# Supplementary material for: Methods to characterize type, relevance, and interactions of organic matter and microorganisms in fluids along the flow path of a geothermal facility
Source: Copernicus journal article supplement (doi:10.5194/bg-2023-159), 2023-09-22
Supplement: Supplementary file 1 [file Suplements_FTICRMS_APPI_data.xlsx]

## Sheet: Data
CalculatedMass_ion	SumFormula_ion	C	H	N	O	S	ObservedMass_ion_Production	ObservedMass_ion_Heat Central	ObservedMass_ion_Injection	ObservedMass_ion_Inhibitor	ObservedMass_ion_Blank	Abundance_Production	Abundance_Heat Central	Abundance_Injection	Abundance_Inhibitor	Abundance_Blank	Comments
181.05	C9 H9 O4	9	9	0	4	0	NA	NA	NA	181.05	NA	0	0	0	5562880	0	NA means under detection limit
185.081	C9 H13 O4	9	13	0	4	0	NA	NA	NA	185.081	NA	0	0	0	3267874	0	NA means under detection limit
187.06	C8 H11 O5	8	11	0	5	0	NA	NA	NA	187.06	NA	0	0	0	2135656	0	NA means under detection limit
193.013	C9 H5 O5	9	5	0	5	0	NA	193.013	NA	NA	NA	0	2243183	0	0	0	NA means under detection limit
195.029	C9 H7 O5	9	7	0	5	0	NA	NA	NA	195.029	NA	0	0	0	4300499	0	NA means under detection limit
195.065	C10 H11 O4	10	11	0	4	0	NA	NA	NA	195.065	NA	0	0	0	3654791	0	NA means under detection limit
199.06	C9 H11 O5	9	11	0	5	0	NA	NA	NA	199.06	NA	0	0	0	3857850	0	NA means under detection limit
203.107	C13 H15 O2	13	15	0	2	0	NA	NA	NA	NA	203.107	0	0	0	0	2196685	NA means under detection limit
209.081	C11 H13 O4	11	13	0	4	0	NA	NA	209.081	NA	NA	0	0	2430514	0	0	NA means under detection limit
209.081	C11 H13 O4	11	13	0	4	0	209.081	NA	NA	NA	NA	3708312	0	0	0	0	NA means under detection limit
213.076	C10 H13 O5	10	13	0	5	0	NA	NA	NA	213.076	NA	0	0	0	11403183	0	NA means under detection limit
215.091	C10 H15 O5	10	15	0	5	0	NA	NA	NA	215.091	NA	0	0	0	2238570	0	NA means under detection limit
219.102	C13 H15 O3	13	15	0	3	0	219.101	NA	NA	NA	NA	2377727	0	0	0	0	NA means under detection limit
221.044	C11 H9 O5	11	9	0	5	0	NA	NA	NA	221.044	NA	0	0	0	2467909	0	NA means under detection limit
221.081	C12 H13 O4	12	13	0	4	0	NA	NA	NA	221.081	NA	0	0	0	2386274	0	NA means under detection limit
223.024	C10 H7 O6	10	7	0	6	0	NA	NA	NA	223.024	NA	0	0	0	2313823	0	NA means under detection limit
223.096	C12 H15 O4	12	15	0	4	0	NA	223.096	NA	NA	NA	0	3420334	0	0	0	NA means under detection limit
227.055	C10 H11 O6	10	11	0	6	0	NA	NA	NA	227.055	NA	0	0	0	10086671	0	NA means under detection limit
227.091	C11 H15 O5	11	15	0	5	0	NA	NA	NA	227.091	NA	0	0	0	4893869	0	NA means under detection limit
233.081	C13 H13 O4	13	13	0	4	0	NA	NA	NA	233.081	NA	0	0	0	3242643	0	NA means under detection limit
233.117	C14 H17 O3	14	17	0	3	0	233.117	NA	NA	NA	NA	4053748	0	0	0	0	NA means under detection limit
233.117	C14 H17 O3	14	17	0	3	0	NA	233.117	NA	NA	NA	0	2644587	0	0	0	NA means under detection limit
235.06	C12 H11 O5	12	11	0	5	0	235.06	NA	NA	NA	NA	2962756	0	0	0	0	NA means under detection limit
235.06	C12 H11 O5	12	11	0	5	0	NA	235.06	NA	NA	NA	0	3126398	0	0	0	NA means under detection limit
235.096	C13 H15 O4	13	15	0	4	0	NA	NA	NA	235.096	NA	0	0	0	2551236	0	NA means under detection limit
235.096	C13 H15 O4	13	15	0	4	0	NA	NA	235.097	NA	NA	0	0	2342259	0	0	NA means under detection limit
235.096	C13 H15 O4	13	15	0	4	0	NA	235.096	NA	NA	NA	0	3208602	0	0	0	NA means under detection limit
237.039	C11 H9 O6	11	9	0	6	0	NA	NA	NA	237.039	NA	0	0	0	3898653	0	NA means under detection limit
237.076	C12 H13 O5	12	13	0	5	0	237.076	NA	NA	NA	NA	2779953	0	0	0	0	NA means under detection limit
237.112	C13 H17 O4	13	17	0	4	0	NA	NA	237.112	NA	NA	0	0	2865164	0	0	NA means under detection limit
239.055	C11 H11 O6	11	11	0	6	0	NA	NA	NA	239.055	NA	0	0	0	4303627	0	NA means under detection limit
239.076	C8 H15 O8	8	15	0	8	0	NA	NA	NA	NA	239.076	0	0	0	0	2412767	NA means under detection limit
241.071	C11 H13 O6	11	13	0	6	0	NA	NA	NA	241.071	NA	0	0	0	24257998	0	NA means under detection limit
241.107	C12 H17 O5	12	17	0	5	0	NA	NA	NA	241.107	NA	0	0	0	5479144	0	NA means under detection limit
241.107	C12 H17 O5	12	17	0	5	0	241.107	NA	NA	NA	NA	2931995	0	0	0	0	NA means under detection limit
243.123	C12 H19 O5	12	19	0	5	0	NA	NA	243.123	NA	NA	0	0	2690667	0	0	NA means under detection limit
243.123	C12 H19 O5	12	19	0	5	0	NA	243.123	NA	NA	NA	0	3183711	0	0	0	NA means under detection limit
245.081	C14 H13 O4	14	13	0	4	0	NA	NA	245.081	NA	NA	0	0	2898239	0	0	NA means under detection limit
245.081	C14 H13 O4	14	13	0	4	0	245.081	NA	NA	NA	NA	3147683	0	0	0	0	NA means under detection limit
245.102	C11 H17 O6	11	17	0	6	0	NA	NA	NA	245.102	NA	0	0	0	5570240	0	NA means under detection limit
247.133	C15 H19 O3	15	19	0	3	0	247.133	NA	NA	NA	NA	2418048	0	0	0	0	NA means under detection limit
249.039	C12 H9 O6	12	9	0	6	0	NA	NA	NA	249.039	NA	0	0	0	2792333	0	NA means under detection limit
249.076	C13 H13 O5	13	13	0	5	0	NA	NA	NA	249.076	NA	0	0	0	2934819	0	NA means under detection limit
249.076	C13 H13 O5	13	13	0	5	0	NA	NA	249.076	NA	NA	0	0	4011263	0	0	NA means under detection limit
249.076	C13 H13 O5	13	13	0	5	0	249.076	NA	NA	NA	NA	3884568	0	0	0	0	NA means under detection limit
249.076	C13 H13 O5	13	13	0	5	0	NA	249.076	NA	NA	NA	0	4121362	0	0	0	NA means under detection limit
249.112	C14 H17 O4	14	17	0	4	0	NA	NA	249.112	NA	NA	0	0	2951701	0	0	NA means under detection limit
249.112	C14 H17 O4	14	17	0	4	0	249.112	NA	NA	NA	NA	4302191	0	0	0	0	NA means under detection limit
249.112	C14 H17 O4	14	17	0	4	0	NA	249.112	NA	NA	NA	0	2723753	0	0	0	NA means under detection limit
251.055	C12 H11 O6	12	11	0	6	0	NA	NA	NA	251.055	NA	0	0	0	7176494	0	NA means under detection limit
251.055	C12 H11 O6	12	11	0	6	0	251.055	NA	NA	NA	NA	2543622	0	0	0	0	NA means under detection limit
251.055	C12 H11 O6	12	11	0	6	0	NA	251.055	NA	NA	NA	0	3092177	0	0	0	NA means under detection limit
251.091	C13 H15 O5	13	15	0	5	0	NA	NA	NA	251.091	NA	0	0	0	3002690	0	NA means under detection limit
251.091	C13 H15 O5	13	15	0	5	0	NA	NA	251.091	NA	NA	0	0	2736335	0	0	NA means under detection limit
251.091	C13 H15 O5	13	15	0	5	0	251.091	NA	NA	NA	NA	2746268	0	0	0	0	NA means under detection limit
251.128	C14 H19 O4	14	19	0	4	0	NA	NA	251.128	NA	NA	0	0	3130085	0	0	NA means under detection limit
251.128	C14 H19 O4	14	19	0	4	0	NA	251.128	NA	NA	NA	0	3155196	0	0	0	NA means under detection limit
253.034	C11 H9 O7	11	9	0	7	0	NA	NA	NA	253.034	NA	0	0	0	2769519	0	NA means under detection limit
253.071	C12 H13 O6	12	13	0	6	0	NA	NA	NA	253.071	NA	0	0	0	9338242	0	NA means under detection limit
253.071	C12 H13 O6	12	13	0	6	0	NA	NA	253.071	NA	NA	0	0	2835399	0	0	NA means under detection limit
253.071	C12 H13 O6	12	13	0	6	0	NA	253.071	NA	NA	NA	0	2422623	0	0	0	NA means under detection limit
253.107	C13 H17 O5	13	17	0	5	0	NA	NA	NA	253.107	NA	0	0	0	2728342	0	NA means under detection limit
253.107	C13 H17 O5	13	17	0	5	0	NA	NA	253.107	NA	NA	0	0	2341467	0	0	NA means under detection limit
253.107	C13 H17 O5	13	17	0	5	0	253.107	NA	NA	NA	NA	2380949	0	0	0	0	NA means under detection limit
255.05	C11 H11 O7	11	11	0	7	0	NA	NA	NA	255.05	NA	0	0	0	5243767	0	NA means under detection limit
255.086	C12 H15 O6	12	15	0	6	0	NA	NA	NA	255.086	NA	0	0	0	8988041	0	NA means under detection limit
255.086	C12 H15 O6	12	15	0	6	0	NA	NA	255.086	NA	NA	0	0	2352781	0	0	NA means under detection limit
255.086	C12 H15 O6	12	15	0	6	0	255.086	NA	NA	NA	NA	2926767	0	0	0	0	NA means under detection limit
255.138	C17 H19 O2	17	19	0	2	0	NA	NA	NA	255.138	NA	0	0	0	12077475	0	NA means under detection limit
257.066	C11 H13 O7	11	13	0	7	0	NA	NA	NA	257.066	NA	0	0	0	4982708	0	NA means under detection limit
257.138	C13 H21 O5	13	21	0	5	0	NA	NA	257.138	NA	NA	0	0	4612769	0	0	NA means under detection limit
257.138	C13 H21 O5	13	21	0	5	0	257.138	NA	NA	NA	NA	5154979	0	0	0	0	NA means under detection limit
257.138	C13 H21 O5	13	21	0	5	0	NA	257.138	NA	NA	NA	0	4886193	0	0	0	NA means under detection limit
259.081	C11 H15 O7	11	15	0	7	0	NA	NA	NA	259.081	NA	0	0	0	6973608	0	NA means under detection limit
259.096	C15 H15 O4	15	15	0	4	0	NA	NA	259.097	NA	NA	0	0	2531396	0	0	NA means under detection limit
259.096	C15 H15 O4	15	15	0	4	0	259.096	NA	NA	NA	NA	4347940	0	0	0	0	NA means under detection limit
259.096	C15 H15 O4	15	15	0	4	0	NA	259.097	NA	NA	NA	0	3301195	0	0	0	NA means under detection limit
259.169	C17 H23 O2	17	23	0	2	0	NA	NA	NA	259.169	NA	0	0	0	2542477	0	NA means under detection limit
259.19	C14 H27 O4	14	27	0	4	0	NA	259.19	NA	NA	NA	0	3022454	0	0	0	NA means under detection limit
261.076	C14 H13 O5	14	13	0	5	0	NA	NA	NA	261.076	NA	0	0	0	5024463	0	NA means under detection limit
261.076	C14 H13 O5	14	13	0	5	0	NA	NA	261.076	NA	NA	0	0	2406837	0	0	NA means under detection limit
261.076	C14 H13 O5	14	13	0	5	0	NA	261.076	NA	NA	NA	0	3065136	0	0	0	NA means under detection limit
261.112	C15 H17 O4	15	17	0	4	0	261.112	NA	NA	NA	NA	2736381	0	0	0	0	NA means under detection limit
261.112	C15 H17 O4	15	17	0	4	0	NA	261.112	NA	NA	NA	0	2588607	0	0	0	NA means under detection limit
263.055	C13 H11 O6	13	11	0	6	0	NA	NA	NA	263.055	NA	0	0	0	4322224	0	NA means under detection limit
263.055	C13 H11 O6	13	11	0	6	0	263.055	NA	NA	NA	NA	2364536	0	0	0	0	NA means under detection limit
263.091	C14 H15 O5	14	15	0	5	0	NA	NA	NA	263.091	NA	0	0	0	5060797	0	NA means under detection limit
263.091	C14 H15 O5	14	15	0	5	0	NA	NA	263.091	NA	NA	0	0	5927162	0	0	NA means under detection limit
263.091	C14 H15 O5	14	15	0	5	0	263.091	NA	NA	NA	NA	5824646	0	0	0	0	NA means under detection limit
263.091	C14 H15 O5	14	15	0	5	0	NA	263.091	NA	NA	NA	0	5989605	0	0	0	NA means under detection limit
263.128	C15 H19 O4	15	19	0	4	0	NA	NA	263.128	NA	NA	0	0	4175624	0	0	NA means under detection limit
263.128	C15 H19 O4	15	19	0	4	0	263.128	NA	NA	NA	NA	3621524	0	0	0	0	NA means under detection limit
263.237	C18 H31 O	18	31	0	1	0	NA	NA	NA	NA	263.237	0	0	0	0	3385630	NA means under detection limit
264.105	C14 H18 N O2 S	14	18	1	2	1	NA	NA	NA	264.105	NA	0	0	0	2523167	0	NA means under detection limit
264.118	C15 H20 O2 S	15	20	0	2	1	NA	NA	NA	264.118	NA	0	0	0	3090979	0	NA means under detection limit
264.983	C7 H5 O11	7	5	0	11	0	NA	NA	264.983	NA	NA	0	0	5344214	0	0	NA means under detection limit
265.001	C8 H9 O8 S	8	9	0	8	1	NA	NA	265.001	NA	NA	0	0	2811741	0	0	NA means under detection limit
265.017	C12 H9 O5 S	12	9	0	5	1	NA	NA	265.017	NA	NA	0	0	2880483	0	0	NA means under detection limit
265.034	C12 H9 O7	12	9	0	7	0	NA	NA	NA	265.034	NA	0	0	0	5233493	0	NA means under detection limit
265.034	C12 H9 O7	12	9	0	7	0	NA	265.034	NA	NA	NA	0	4496835	0	0	0	NA means under detection limit
265.071	C13 H13 O6	13	13	0	6	0	NA	NA	NA	265.071	NA	0	0	0	11394401	0	NA means under detection limit
265.071	C13 H13 O6	13	13	0	6	0	NA	NA	265.071	NA	NA	0	0	3632119	0	0	NA means under detection limit
265.071	C13 H13 O6	13	13	0	6	0	265.071	NA	NA	NA	NA	4269396	0	0	0	0	NA means under detection limit
265.071	C13 H13 O6	13	13	0	6	0	NA	265.071	NA	NA	NA	0	3108817	0	0	0	NA means under detection limit
265.107	C14 H17 O5	14	17	0	5	0	NA	NA	NA	265.107	NA	0	0	0	3442797	0	NA means under detection limit
265.107	C14 H17 O5	14	17	0	5	0	NA	NA	265.107	NA	NA	0	0	3754501	0	0	NA means under detection limit
265.107	C14 H17 O5	14	17	0	5	0	265.107	NA	NA	NA	NA	4110688	0	0	0	0	NA means under detection limit
265.107	C14 H17 O5	14	17	0	5	0	NA	265.107	NA	NA	NA	0	3626462	0	0	0	NA means under detection limit
265.143	C15 H21 O4	15	21	0	4	0	NA	NA	265.143	NA	NA	0	0	2637842	0	0	NA means under detection limit
265.143	C15 H21 O4	15	21	0	4	0	265.143	NA	NA	NA	NA	3413869	0	0	0	0	NA means under detection limit
265.143	C15 H21 O4	15	21	0	4	0	NA	265.143	NA	NA	NA	0	3225579	0	0	0	NA means under detection limit
265.159	C19 H21 O	19	21	0	1	0	NA	NA	NA	265.159	NA	0	0	0	2691198	0	NA means under detection limit
265.18	C16 H25 O3	16	25	0	3	0	NA	NA	NA	NA	265.18	0	0	0	0	2338682	NA means under detection limit
265.253	C18 H33 O	18	33	0	1	0	NA	NA	NA	NA	265.253	0	0	0	0	2660923	NA means under detection limit
265.253	C18 H33 O	18	33	0	1	0	NA	NA	NA	NA	265.253	0	0	0	0	2792083	NA means under detection limit
265.253	C18 H33 O	18	33	0	1	0	NA	NA	NA	NA	265.253	0	0	0	0	3279122	NA means under detection limit
265.253	C18 H33 O	18	33	0	1	0	NA	NA	NA	NA	265.253	0	0	0	0	2644124	NA means under detection limit
266.102	C13 H16 N O5	13	16	1	5	0	NA	266.102	NA	NA	NA	0	2545728	0	0	0	NA means under detection limit
267.05	C12 H11 O7	12	11	0	7	0	NA	NA	NA	267.05	NA	0	0	0	4825035	0	NA means under detection limit
267.05	C12 H11 O7	12	11	0	7	0	NA	NA	267.05	NA	NA	0	0	2566591	0	0	NA means under detection limit
267.05	C12 H11 O7	12	11	0	7	0	267.05	NA	NA	NA	NA	3443433	0	0	0	0	NA means under detection limit
267.086	C13 H15 O6	13	15	0	6	0	NA	NA	NA	267.086	NA	0	0	0	18265046	0	NA means under detection limit
267.086	C13 H15 O6	13	15	0	6	0	NA	NA	267.086	NA	NA	0	0	5402316	0	0	NA means under detection limit
267.086	C13 H15 O6	13	15	0	6	0	267.086	NA	NA	NA	NA	7448052	0	0	0	0	NA means under detection limit
267.086	C13 H15 O6	13	15	0	6	0	NA	267.086	NA	NA	NA	0	5083792	0	0	0	NA means under detection limit
267.123	C14 H19 O5	14	19	0	5	0	NA	NA	NA	267.123	NA	0	0	0	2907361	0	NA means under detection limit
267.123	C14 H19 O5	14	19	0	5	0	NA	NA	267.123	NA	NA	0	0	3156697	0	0	NA means under detection limit
267.123	C14 H19 O5	14	19	0	5	0	267.123	NA	NA	NA	NA	4159232	0	0	0	0	NA means under detection limit
267.123	C14 H19 O5	14	19	0	5	0	NA	267.123	NA	NA	NA	0	3008412	0	0	0	NA means under detection limit
267.174	C19 H23 O	19	23	0	1	0	NA	NA	NA	267.174	NA	0	0	0	4383216	0	NA means under detection limit
268.118	C13 H18 N O5	13	18	1	5	0	NA	NA	268.118	NA	NA	0	0	3074346	0	0	NA means under detection limit
268.118	C13 H18 N O5	13	18	1	5	0	268.118	NA	NA	NA	NA	3401271	0	0	0	0	NA means under detection limit
268.118	C13 H18 N O5	13	18	1	5	0	NA	268.118	NA	NA	NA	0	3410658	0	0	0	NA means under detection limit
269.029	C11 H9 O8	11	9	0	8	0	NA	NA	NA	269.029	NA	0	0	0	6553088	0	NA means under detection limit
269.066	C12 H13 O7	12	13	0	7	0	NA	NA	NA	269.066	NA	0	0	0	13779465	0	NA means under detection limit
269.066	C12 H13 O7	12	13	0	7	0	NA	NA	269.066	NA	NA	0	0	2556000	0	0	NA means under detection limit
269.066	C12 H13 O7	12	13	0	7	0	269.066	NA	NA	NA	NA	4078162	0	0	0	0	NA means under detection limit
269.066	C12 H13 O7	12	13	0	7	0	NA	269.066	NA	NA	NA	0	3089421	0	0	0	NA means under detection limit
269.102	C13 H17 O6	13	17	0	6	0	NA	NA	NA	269.102	NA	0	0	0	5701652	0	NA means under detection limit
269.102	C13 H17 O6	13	17	0	6	0	NA	NA	269.102	NA	NA	0	0	2616684	0	0	NA means under detection limit
269.102	C13 H17 O6	13	17	0	6	0	269.102	NA	NA	NA	NA	2417501	0	0	0	0	NA means under detection limit
269.102	C13 H17 O6	13	17	0	6	0	NA	269.102	NA	NA	NA	0	2915736	0	0	0	NA means under detection limit
269.154	C18 H21 O2	18	21	0	2	0	NA	NA	NA	269.154	NA	0	0	0	2617633	0	NA means under detection limit
269.19	C19 H25 O	19	25	0	1	0	NA	NA	NA	269.19	NA	0	0	0	3832363	0	NA means under detection limit
269.248	C17 H33 O2	17	33	0	2	0	NA	NA	NA	NA	269.247	0	0	0	0	2458427	NA means under detection limit
270.279	C17 H36 N O	17	36	1	1	0	NA	NA	NA	270.279	NA	0	0	0	2877258	0	NA means under detection limit
271.045	C11 H11 O8	11	11	0	8	0	NA	NA	NA	271.045	NA	0	0	0	3044618	0	NA means under detection limit
271.081	C12 H15 O7	12	15	0	7	0	NA	NA	NA	271.081	NA	0	0	0	8217619	0	NA means under detection limit
271.081	C12 H15 O7	12	15	0	7	0	271.081	NA	NA	NA	NA	2516103	0	0	0	0	NA means under detection limit
271.096	C16 H15 O4	16	15	0	4	0	NA	NA	271.097	NA	NA	0	0	2564309	0	0	NA means under detection limit
271.096	C16 H15 O4	16	15	0	4	0	271.097	NA	NA	NA	NA	2865803	0	0	0	0	NA means under detection limit
271.096	C16 H15 O4	16	15	0	4	0	NA	271.096	NA	NA	NA	0	3083366	0	0	0	NA means under detection limit
271.154	C14 H23 O5	14	23	0	5	0	NA	NA	271.154	NA	NA	0	0	3579366	0	0	NA means under detection limit
271.154	C14 H23 O5	14	23	0	5	0	271.154	NA	NA	NA	NA	4224154	0	0	0	0	NA means under detection limit
271.154	C14 H23 O5	14	23	0	5	0	NA	271.154	NA	NA	NA	0	5011318	0	0	0	NA means under detection limit
271.263	C17 H35 O2	17	35	0	2	0	NA	NA	NA	NA	271.263	0	0	0	0	2539526	NA means under detection limit
271.263	C17 H35 O2	17	35	0	2	0	NA	NA	NA	NA	271.263	0	0	0	0	2435647	NA means under detection limit
273.076	C15 H13 O5	15	13	0	5	0	273.076	NA	NA	NA	NA	2514053	0	0	0	0	NA means under detection limit
273.097	C12 H17 O7	12	17	0	7	0	NA	NA	NA	273.097	NA	0	0	0	163827184	0	NA means under detection limit
273.112	C16 H17 O4	16	17	0	4	0	NA	NA	273.112	NA	NA	0	0	3427861	0	0	NA means under detection limit
273.112	C16 H17 O4	16	17	0	4	0	273.112	NA	NA	NA	NA	3785870	0	0	0	0	NA means under detection limit
273.112	C16 H17 O4	16	17	0	4	0	NA	273.112	NA	NA	NA	0	3344265	0	0	0	NA means under detection limit
273.133	C13 H21 O6	13	21	0	6	0	NA	NA	NA	273.133	NA	0	0	0	3210227	0	NA means under detection limit
273.149	C17 H21 O3	17	21	0	3	0	NA	NA	273.149	NA	NA	0	0	2398239	0	0	NA means under detection limit
273.206	C15 H29 O4	15	29	0	4	0	NA	273.206	NA	NA	NA	0	2538145	0	0	0	NA means under detection limit
275.091	C15 H15 O5	15	15	0	5	0	NA	NA	NA	275.091	NA	0	0	0	3534736	0	NA means under detection limit
275.091	C15 H15 O5	15	15	0	5	0	NA	NA	275.091	NA	NA	0	0	3496992	0	0	NA means under detection limit
275.091	C15 H15 O5	15	15	0	5	0	275.091	NA	NA	NA	NA	3208282	0	0	0	0	NA means under detection limit
275.091	C15 H15 O5	15	15	0	5	0	NA	275.091	NA	NA	NA	0	2882420	0	0	0	NA means under detection limit
275.128	C16 H19 O4	16	19	0	4	0	NA	NA	275.128	NA	NA	0	0	4042281	0	0	NA means under detection limit
275.128	C16 H19 O4	16	19	0	4	0	275.128	NA	NA	NA	NA	3674210	0	0	0	0	NA means under detection limit
275.128	C16 H19 O4	16	19	0	4	0	NA	275.128	NA	NA	NA	0	3369341	0	0	0	NA means under detection limit
275.164	C17 H23 O3	17	23	0	3	0	NA	NA	NA	275.164	NA	0	0	0	2655135	0	NA means under detection limit
275.164	C17 H23 O3	17	23	0	3	0	275.164	NA	NA	NA	NA	2579818	0	0	0	0	NA means under detection limit
277.034	C13 H9 O7	13	9	0	7	0	NA	NA	NA	277.034	NA	0	0	0	2824450	0	NA means under detection limit
277.038	C10 H13 O7 S	10	13	0	7	1	NA	NA	NA	277.038	NA	0	0	0	22931714	0	NA means under detection limit
277.071	C14 H13 O6	14	13	0	6	0	NA	NA	NA	277.071	NA	0	0	0	4868360	0	NA means under detection limit
277.071	C14 H13 O6	14	13	0	6	0	NA	NA	277.071	NA	NA	0	0	2544131	0	0	NA means under detection limit
277.071	C14 H13 O6	14	13	0	6	0	277.071	NA	NA	NA	NA	3177980	0	0	0	0	NA means under detection limit
277.071	C14 H13 O6	14	13	0	6	0	NA	277.071	NA	NA	NA	0	2365237	0	0	0	NA means under detection limit
277.107	C15 H17 O5	15	17	0	5	0	NA	NA	NA	277.107	NA	0	0	0	3399183	0	NA means under detection limit
277.107	C15 H17 O5	15	17	0	5	0	NA	NA	277.107	NA	NA	0	0	5624331	0	0	NA means under detection limit
277.107	C15 H17 O5	15	17	0	5	0	277.107	NA	NA	NA	NA	6823940	0	0	0	0	NA means under detection limit
277.107	C15 H17 O5	15	17	0	5	0	NA	277.107	NA	NA	NA	0	5765437	0	0	0	NA means under detection limit
277.143	C16 H21 O4	16	21	0	4	0	NA	NA	277.143	NA	NA	0	0	4678164	0	0	NA means under detection limit
277.143	C16 H21 O4	16	21	0	4	0	277.143	NA	NA	NA	NA	4571659	0	0	0	0	NA means under detection limit
277.143	C16 H21 O4	16	21	0	4	0	NA	277.143	NA	NA	NA	0	4206917	0	0	0	NA means under detection limit
277.18	C17 H25 O3	17	25	0	3	0	NA	NA	NA	NA	277.18	0	0	0	0	3314204	NA means under detection limit
277.18	C17 H25 O3	17	25	0	3	0	NA	NA	NA	NA	277.18	0	0	0	0	3642898	NA means under detection limit
277.18	C17 H25 O3	17	25	0	3	0	NA	NA	NA	NA	277.18	0	0	0	0	3776845	NA means under detection limit
277.18	C17 H25 O3	17	25	0	3	0	NA	NA	NA	NA	277.18	0	0	0	0	4183836	NA means under detection limit
277.216	C18 H29 O2	18	29	0	2	0	NA	NA	NA	NA	277.216	0	0	0	0	9390420	NA means under detection limit
279.05	C13 H11 O7	13	11	0	7	0	NA	NA	NA	279.05	NA	0	0	0	12632666	0	NA means under detection limit
279.086	C14 H15 O6	14	15	0	6	0	NA	NA	NA	279.086	NA	0	0	0	11089504	0	NA means under detection limit
279.086	C14 H15 O6	14	15	0	6	0	NA	NA	279.086	NA	NA	0	0	5577672	0	0	NA means under detection limit
279.086	C14 H15 O6	14	15	0	6	0	279.086	NA	NA	NA	NA	7136638	0	0	0	0	NA means under detection limit
279.086	C14 H15 O6	14	15	0	6	0	NA	279.086	NA	NA	NA	0	5310166	0	0	0	NA means under detection limit
279.123	C15 H19 O5	15	19	0	5	0	NA	NA	NA	279.123	NA	0	0	0	2641254	0	NA means under detection limit
279.123	C15 H19 O5	15	19	0	5	0	NA	NA	279.123	NA	NA	0	0	4484048	0	0	NA means under detection limit
279.123	C15 H19 O5	15	19	0	5	0	279.123	NA	NA	NA	NA	4878725	0	0	0	0	NA means under detection limit
279.123	C15 H19 O5	15	19	0	5	0	NA	279.123	NA	NA	NA	0	3652317	0	0	0	NA means under detection limit
279.159	C16 H23 O4	16	23	0	4	0	NA	NA	NA	NA	279.159	0	0	0	0	2858968	NA means under detection limit
279.159	C16 H23 O4	16	23	0	4	0	NA	NA	NA	NA	279.159	0	0	0	0	3110372	NA means under detection limit
279.159	C16 H23 O4	16	23	0	4	0	NA	NA	NA	NA	279.159	0	0	0	0	2679916	NA means under detection limit
279.232	C18 H31 O2	18	31	0	2	0	NA	NA	NA	NA	279.232	0	0	0	0	2743015	NA means under detection limit
279.232	C18 H31 O2	18	31	0	2	0	NA	NA	NA	NA	279.232	0	0	0	0	3229426	NA means under detection limit
280.097	C17 H14 N O3	17	14	1	3	0	NA	NA	NA	NA	280.097	0	0	0	0	18767006	NA means under detection limit
280.097	C17 H14 N O3	17	14	1	3	0	NA	NA	NA	NA	280.097	0	0	0	0	17946162	NA means under detection limit
280.097	C17 H14 N O3	17	14	1	3	0	NA	NA	NA	NA	280.097	0	0	0	0	18040728	NA means under detection limit
280.097	C17 H14 N O3	17	14	1	3	0	NA	NA	NA	NA	280.097	0	0	0	0	17756926	NA means under detection limit
280.118	C14 H18 N O5	14	18	1	5	0	NA	NA	280.118	NA	NA	0	0	3739810	0	0	NA means under detection limit
280.118	C14 H18 N O5	14	18	1	5	0	280.118	NA	NA	NA	NA	3662389	0	0	0	0	NA means under detection limit
280.118	C14 H18 N O5	14	18	1	5	0	NA	280.118	NA	NA	NA	0	3306908	0	0	0	NA means under detection limit
281.029	C12 H9 O8	12	9	0	8	0	NA	NA	NA	281.029	NA	0	0	0	5035913	0	NA means under detection limit
281.066	C13 H13 O7	13	13	0	7	0	NA	NA	NA	281.066	NA	0	0	0	14245774	0	NA means under detection limit
281.066	C13 H13 O7	13	13	0	7	0	NA	NA	281.066	NA	NA	0	0	3665251	0	0	NA means under detection limit
281.066	C13 H13 O7	13	13	0	7	0	281.066	NA	NA	NA	NA	5651157	0	0	0	0	NA means under detection limit
281.066	C13 H13 O7	13	13	0	7	0	NA	281.066	NA	NA	NA	0	3707466	0	0	0	NA means under detection limit
281.102	C14 H17 O6	14	17	0	6	0	NA	NA	NA	281.102	NA	0	0	0	10809235	0	NA means under detection limit
281.102	C14 H17 O6	14	17	0	6	0	NA	NA	281.102	NA	NA	0	0	7628138	0	0	NA means under detection limit
281.102	C14 H17 O6	14	17	0	6	0	281.102	NA	NA	NA	NA	7518939	0	0	0	0	NA means under detection limit
281.102	C14 H17 O6	14	17	0	6	0	NA	281.102	NA	NA	NA	0	7236688	0	0	0	NA means under detection limit
281.138	C15 H21 O5	15	21	0	5	0	NA	NA	281.138	NA	NA	0	0	3071857	0	0	NA means under detection limit
281.138	C15 H21 O5	15	21	0	5	0	281.138	NA	NA	NA	NA	3543777	0	0	0	0	NA means under detection limit
281.138	C15 H21 O5	15	21	0	5	0	NA	281.138	NA	NA	NA	0	2637143	0	0	0	NA means under detection limit
281.248	C18 H33 O2	18	33	0	2	0	NA	NA	NA	NA	281.248	0	0	0	0	3483754	NA means under detection limit
281.248	C18 H33 O2	18	33	0	2	0	NA	NA	NA	NA	281.248	0	0	0	0	3028136	NA means under detection limit
282.134	C14 H20 N O5	14	20	1	5	0	NA	NA	282.134	NA	NA	0	0	3668019	0	0	NA means under detection limit
282.134	C14 H20 N O5	14	20	1	5	0	282.134	NA	NA	NA	NA	4025216	0	0	0	0	NA means under detection limit
282.134	C14 H20 N O5	14	20	1	5	0	NA	282.134	NA	NA	NA	0	3685124	0	0	0	NA means under detection limit
282.191	C12 H28 N O6	12	28	1	6	0	NA	NA	NA	282.191	NA	0	0	0	2608428	0	NA means under detection limit
282.279	C18 H36 N O	18	36	1	1	0	NA	NA	NA	282.279	NA	0	0	0	2823479	0	NA means under detection limit
283.045	C12 H11 O8	12	11	0	8	0	NA	NA	NA	283.045	NA	0	0	0	20065436	0	NA means under detection limit
283.045	C12 H11 O8	12	11	0	8	0	NA	NA	283.045	NA	NA	0	0	4070621	0	0	NA means under detection limit
283.045	C12 H11 O8	12	11	0	8	0	283.045	NA	NA	NA	NA	6984715	0	0	0	0	NA means under detection limit
283.045	C12 H11 O8	12	11	0	8	0	NA	283.045	NA	NA	NA	0	3772828	0	0	0	NA means under detection limit
283.06	C16 H11 O5	16	11	0	5	0	NA	NA	283.06	NA	NA	0	0	4494048	0	0	NA means under detection limit
283.06	C16 H11 O5	16	11	0	5	0	283.06	NA	NA	NA	NA	4599309	0	0	0	0	NA means under detection limit
283.06	C16 H11 O5	16	11	0	5	0	NA	283.06	NA	NA	NA	0	3315358	0	0	0	NA means under detection limit
283.081	C13 H15 O7	13	15	0	7	0	NA	NA	NA	283.081	NA	0	0	0	19989664	0	NA means under detection limit
283.081	C13 H15 O7	13	15	0	7	0	NA	NA	283.081	NA	NA	0	0	3570916	0	0	NA means under detection limit
283.081	C13 H15 O7	13	15	0	7	0	283.081	NA	NA	NA	NA	4227600	0	0	0	0	NA means under detection limit
283.081	C13 H15 O7	13	15	0	7	0	NA	283.081	NA	NA	NA	0	3853730	0	0	0	NA means under detection limit
283.118	C14 H19 O6	14	19	0	6	0	NA	NA	NA	283.118	NA	0	0	0	5505190	0	NA means under detection limit
283.118	C14 H19 O6	14	19	0	6	0	NA	NA	283.118	NA	NA	0	0	3134186	0	0	NA means under detection limit
283.118	C14 H19 O6	14	19	0	6	0	283.118	NA	NA	NA	NA	3201046	0	0	0	0	NA means under detection limit
283.118	C14 H19 O6	14	19	0	6	0	NA	283.118	NA	NA	NA	0	2868903	0	0	0	NA means under detection limit
283.169	C19 H23 O2	19	23	0	2	0	NA	NA	NA	283.169	NA	0	0	0	5604524	0	NA means under detection limit
283.263	C18 H35 O2	18	35	0	2	0	NA	NA	NA	NA	283.263	0	0	0	0	3067141	NA means under detection limit
283.263	C18 H35 O2	18	35	0	2	0	NA	NA	NA	NA	283.263	0	0	0	0	2885163	NA means under detection limit
283.263	C18 H35 O2	18	35	0	2	0	NA	NA	NA	NA	283.263	0	0	0	0	3180479	NA means under detection limit
283.263	C18 H35 O2	18	35	0	2	0	NA	NA	NA	NA	283.263	0	0	0	0	7415992	NA means under detection limit
284.055	C15 H10 N O5	15	10	1	5	0	NA	NA	284.055	NA	NA	0	0	3669907	0	0	NA means under detection limit
284.055	C15 H10 N O5	15	10	1	5	0	284.055	NA	NA	NA	NA	2598045	0	0	0	0	NA means under detection limit
284.055	C15 H10 N O5	15	10	1	5	0	NA	284.055	NA	NA	NA	0	2754620	0	0	0	NA means under detection limit
284.295	C18 H38 N O	18	38	1	1	0	NA	NA	NA	NA	284.295	0	0	0	0	2829757	NA means under detection limit
284.295	C18 H38 N O	18	38	1	1	0	NA	NA	NA	NA	284.295	0	0	0	0	3258047	NA means under detection limit
284.295	C18 H38 N O	18	38	1	1	0	NA	NA	NA	NA	284.295	0	0	0	0	2653793	NA means under detection limit
284.295	C18 H38 N O	18	38	1	1	0	NA	NA	NA	NA	284.295	0	0	0	0	6855992	NA means under detection limit
285.06	C12 H13 O8	12	13	0	8	0	NA	NA	NA	285.061	NA	0	0	0	11042193	0	NA means under detection limit
285.06	C12 H13 O8	12	13	0	8	0	285.06	NA	NA	NA	NA	3070760	0	0	0	0	NA means under detection limit
285.076	C16 H13 O5	16	13	0	5	0	NA	NA	285.076	NA	NA	0	0	2538051	0	0	NA means under detection limit
285.097	C13 H17 O7	13	17	0	7	0	NA	NA	NA	285.097	NA	0	0	0	20061590	0	NA means under detection limit
285.097	C13 H17 O7	13	17	0	7	0	NA	NA	285.097	NA	NA	0	0	3775558	0	0	NA means under detection limit
285.097	C13 H17 O7	13	17	0	7	0	285.097	NA	NA	NA	NA	5210413	0	0	0	0	NA means under detection limit
285.097	C13 H17 O7	13	17	0	7	0	NA	285.097	NA	NA	NA	0	3538137	0	0	0	NA means under detection limit
285.112	C17 H17 O4	17	17	0	4	0	NA	NA	285.112	NA	NA	0	0	2661449	0	0	NA means under detection limit
285.112	C17 H17 O4	17	17	0	4	0	NA	285.112	NA	NA	NA	0	3265755	0	0	0	NA means under detection limit
285.17	C15 H25 O5	15	25	0	5	0	NA	NA	285.17	NA	NA	0	0	2729043	0	0	NA means under detection limit
285.17	C15 H25 O5	15	25	0	5	0	285.17	NA	NA	NA	NA	2894134	0	0	0	0	NA means under detection limit
285.17	C15 H25 O5	15	25	0	5	0	NA	285.17	NA	NA	NA	0	2612196	0	0	0	NA means under detection limit
285.185	C19 H25 O2	19	25	0	2	0	NA	NA	NA	285.185	NA	0	0	0	4206752	0	NA means under detection limit
286.31	C18 H40 N O	18	40	1	1	0	NA	NA	NA	286.31	NA	0	0	0	6278684	0	NA means under detection limit
287.04	C11 H11 O9	11	11	0	9	0	NA	NA	NA	287.04	NA	0	0	0	3115880	0	NA means under detection limit
287.076	C12 H15 O8	12	15	0	8	0	NA	NA	NA	287.076	NA	0	0	0	4136043	0	NA means under detection limit
287.091	C16 H15 O5	16	15	0	5	0	NA	NA	287.091	NA	NA	0	0	5875082	0	0	NA means under detection limit
287.091	C16 H15 O5	16	15	0	5	0	287.091	NA	NA	NA	NA	6116906	0	0	0	0	NA means under detection limit
287.091	C16 H15 O5	16	15	0	5	0	NA	287.091	NA	NA	NA	0	6492144	0	0	0	NA means under detection limit
287.113	C13 H19 O7	13	19	0	7	0	NA	NA	NA	287.113	NA	0	0	0	13740655	0	NA means under detection limit
287.113	C13 H19 O7	13	19	0	7	0	NA	NA	287.112	NA	NA	0	0	3227021	0	0	NA means under detection limit
287.113	C13 H19 O7	13	19	0	7	0	287.113	NA	NA	NA	NA	3821101	0	0	0	0	NA means under detection limit
287.113	C13 H19 O7	13	19	0	7	0	NA	287.113	NA	NA	NA	0	3011571	0	0	0	NA means under detection limit
287.128	C17 H19 O4	17	19	0	4	0	NA	NA	287.128	NA	NA	0	0	2948496	0	0	NA means under detection limit
287.128	C17 H19 O4	17	19	0	4	0	287.128	NA	NA	NA	NA	3930671	0	0	0	0	NA means under detection limit
287.128	C17 H19 O4	17	19	0	4	0	NA	287.128	NA	NA	NA	0	3521525	0	0	0	NA means under detection limit
287.201	C19 H27 O2	19	27	0	2	0	NA	NA	NA	287.201	NA	0	0	0	2764408	0	NA means under detection limit
287.222	C16 H31 O4	16	31	0	4	0	287.222	NA	NA	NA	NA	3230778	0	0	0	0	NA means under detection limit
287.222	C16 H31 O4	16	31	0	4	0	NA	287.222	NA	NA	NA	0	3130369	0	0	0	NA means under detection limit
289.071	C15 H13 O6	15	13	0	6	0	NA	NA	NA	289.071	NA	0	0	0	2981164	0	NA means under detection limit
289.071	C15 H13 O6	15	13	0	6	0	289.071	NA	NA	NA	NA	2395150	0	0	0	0	NA means under detection limit
289.071	C15 H13 O6	15	13	0	6	0	NA	289.071	NA	NA	NA	0	2441195	0	0	0	NA means under detection limit
289.107	C16 H17 O5	16	17	0	5	0	NA	NA	NA	289.107	NA	0	0	0	2834223	0	NA means under detection limit
289.107	C16 H17 O5	16	17	0	5	0	NA	NA	289.107	NA	NA	0	0	4297401	0	0	NA means under detection limit
289.107	C16 H17 O5	16	17	0	5	0	289.107	NA	NA	NA	NA	4204306	0	0	0	0	NA means under detection limit
289.107	C16 H17 O5	16	17	0	5	0	NA	289.107	NA	NA	NA	0	2934511	0	0	0	NA means under detection limit
289.143	C17 H21 O4	17	21	0	4	0	NA	NA	NA	289.143	NA	0	0	0	3193395	0	NA means under detection limit
289.143	C17 H21 O4	17	21	0	4	0	NA	NA	289.143	NA	NA	0	0	3936446	0	0	NA means under detection limit
289.143	C17 H21 O4	17	21	0	4	0	289.143	NA	NA	NA	NA	4202774	0	0	0	0	NA means under detection limit
289.143	C17 H21 O4	17	21	0	4	0	NA	289.143	NA	NA	NA	0	3857652	0	0	0	NA means under detection limit
289.18	C18 H25 O3	18	25	0	3	0	NA	NA	NA	289.18	NA	0	0	0	2365238	0	NA means under detection limit
291.05	C14 H11 O7	14	11	0	7	0	NA	NA	NA	291.05	NA	0	0	0	3506648	0	NA means under detection limit
291.086	C15 H15 O6	15	15	0	6	0	NA	NA	NA	291.086	NA	0	0	0	3912667	0	NA means under detection limit
291.086	C15 H15 O6	15	15	0	6	0	NA	NA	291.086	NA	NA	0	0	3276236	0	0	NA means under detection limit
291.086	C15 H15 O6	15	15	0	6	0	291.086	NA	NA	NA	NA	4151777	0	0	0	0	NA means under detection limit
291.086	C15 H15 O6	15	15	0	6	0	NA	291.086	NA	NA	NA	0	3697619	0	0	0	NA means under detection limit
291.123	C16 H19 O5	16	19	0	5	0	NA	NA	291.123	NA	NA	0	0	5919697	0	0	NA means under detection limit
291.123	C16 H19 O5	16	19	0	5	0	291.123	NA	NA	NA	NA	6221797	0	0	0	0	NA means under detection limit
291.123	C16 H19 O5	16	19	0	5	0	NA	291.123	NA	NA	NA	0	5477847	0	0	0	NA means under detection limit
291.159	C17 H23 O4	17	23	0	4	0	NA	NA	NA	291.159	NA	0	0	0	10033121	0	NA means under detection limit
291.159	C17 H23 O4	17	23	0	4	0	NA	NA	291.159	NA	NA	0	0	3068374	0	0	NA means under detection limit
291.159	C17 H23 O4	17	23	0	4	0	291.159	NA	NA	NA	NA	2881256	0	0	0	0	NA means under detection limit
291.195	C18 H27 O3	18	27	0	3	0	NA	NA	NA	291.195	NA	0	0	0	2522980	0	NA means under detection limit
291.195	C18 H27 O3	18	27	0	3	0	NA	291.195	NA	NA	NA	0	5224927	0	0	0	NA means under detection limit
292.118	C15 H18 N O5	15	18	1	5	0	NA	NA	292.118	NA	NA	0	0	2633300	0	0	NA means under detection limit
292.118	C15 H18 N O5	15	18	1	5	0	292.118	NA	NA	NA	NA	2595909	0	0	0	0	NA means under detection limit
292.118	C15 H18 N O5	15	18	1	5	0	NA	292.118	NA	NA	NA	0	2415169	0	0	0	NA means under detection limit
293.029	C13 H9 O8	13	9	0	8	0	NA	NA	NA	293.029	NA	0	0	0	2641523	0	NA means under detection limit
293.066	C14 H13 O7	14	13	0	7	0	NA	NA	NA	293.066	NA	0	0	0	16898166	0	NA means under detection limit
293.066	C14 H13 O7	14	13	0	7	0	NA	NA	293.066	NA	NA	0	0	4192973	0	0	NA means under detection limit
293.066	C14 H13 O7	14	13	0	7	0	293.066	NA	NA	NA	NA	7212190	0	0	0	0	NA means under detection limit
293.066	C14 H13 O7	14	13	0	7	0	NA	293.066	NA	NA	NA	0	4968098	0	0	0	NA means under detection limit
293.102	C15 H17 O6	15	17	0	6	0	NA	NA	NA	293.102	NA	0	0	0	16187512	0	NA means under detection limit
293.102	C15 H17 O6	15	17	0	6	0	NA	NA	293.102	NA	NA	0	0	7635154	0	0	NA means under detection limit
293.102	C15 H17 O6	15	17	0	6	0	293.102	NA	NA	NA	NA	9524385	0	0	0	0	NA means under detection limit
293.102	C15 H17 O6	15	17	0	6	0	NA	293.102	NA	NA	NA	0	7284389	0	0	0	NA means under detection limit
293.138	C16 H21 O5	16	21	0	5	0	NA	NA	293.138	NA	NA	0	0	4429014	0	0	NA means under detection limit
293.138	C16 H21 O5	16	21	0	5	0	293.138	NA	NA	NA	NA	4438180	0	0	0	0	NA means under detection limit
293.138	C16 H21 O5	16	21	0	5	0	NA	293.138	NA	NA	NA	0	4176041	0	0	0	NA means under detection limit
293.175	C17 H25 O4	17	25	0	4	0	NA	NA	NA	NA	293.175	0	0	0	0	2439899	NA means under detection limit
293.211	C18 H29 O3	18	29	0	3	0	NA	293.211	NA	NA	NA	0	2927280	0	0	0	NA means under detection limit
294.134	C15 H20 N O5	15	20	1	5	0	NA	NA	294.134	NA	NA	0	0	4667729	0	0	NA means under detection limit
294.134	C15 H20 N O5	15	20	1	5	0	294.134	NA	NA	NA	NA	4612349	0	0	0	0	NA means under detection limit
294.134	C15 H20 N O5	15	20	1	5	0	NA	294.134	NA	NA	NA	0	5116682	0	0	0	NA means under detection limit
295.045	C13 H11 O8	13	11	0	8	0	NA	NA	NA	295.045	NA	0	0	0	13897987	0	NA means under detection limit
295.081	C14 H15 O7	14	15	0	7	0	NA	NA	NA	295.081	NA	0	0	0	19106054	0	NA means under detection limit
295.081	C14 H15 O7	14	15	0	7	0	NA	NA	295.081	NA	NA	0	0	7919042	0	0	NA means under detection limit
295.081	C14 H15 O7	14	15	0	7	0	295.081	NA	NA	NA	NA	9919822	0	0	0	0	NA means under detection limit
295.081	C14 H15 O7	14	15	0	7	0	NA	295.081	NA	NA	NA	0	7349091	0	0	0	NA means under detection limit
295.118	C15 H19 O6	15	19	0	6	0	NA	NA	NA	295.118	NA	0	0	0	18780424	0	NA means under detection limit
295.118	C15 H19 O6	15	19	0	6	0	NA	NA	295.118	NA	NA	0	0	12871110	0	0	NA means under detection limit
295.118	C15 H19 O6	15	19	0	6	0	295.118	NA	NA	NA	NA	12844369	0	0	0	0	NA means under detection limit
295.118	C15 H19 O6	15	19	0	6	0	NA	295.118	NA	NA	NA	0	11595622	0	0	0	NA means under detection limit
295.154	C16 H23 O5	16	23	0	5	0	295.154	NA	NA	NA	NA	2767700	0	0	0	0	NA means under detection limit
295.154	C16 H23 O5	16	23	0	5	0	NA	295.154	NA	NA	NA	0	2712681	0	0	0	NA means under detection limit
295.227	C18 H31 O3	18	31	0	3	0	NA	NA	NA	NA	295.227	0	0	0	0	2543571	NA means under detection limit
295.227	C18 H31 O3	18	31	0	3	0	NA	NA	NA	NA	295.227	0	0	0	0	2387803	NA means under detection limit
295.227	C18 H31 O3	18	31	0	3	0	NA	NA	NA	NA	295.227	0	0	0	0	35489648	NA means under detection limit
295.227	C18 H31 O3	18	31	0	3	0	NA	NA	NA	NA	295.227	0	0	0	0	5142288	NA means under detection limit
296.113	C14 H18 N O6	14	18	1	6	0	296.113	NA	NA	NA	NA	2462628	0	0	0	0	NA means under detection limit
296.149	C15 H22 N O5	15	22	1	5	0	NA	NA	296.149	NA	NA	0	0	4326974	0	0	NA means under detection limit
296.149	C15 H22 N O5	15	22	1	5	0	296.149	NA	NA	NA	NA	4251047	0	0	0	0	NA means under detection limit
296.149	C15 H22 N O5	15	22	1	5	0	NA	296.149	NA	NA	NA	0	4231106	0	0	0	NA means under detection limit
296.295	C19 H38 N O	19	38	1	1	0	NA	NA	NA	296.295	NA	0	0	0	6515543	0	NA means under detection limit
297.06	C13 H13 O8	13	13	0	8	0	NA	NA	NA	297.06	NA	0	0	0	31402376	0	NA means under detection limit
297.06	C13 H13 O8	13	13	0	8	0	NA	NA	297.061	NA	NA	0	0	6692518	0	0	NA means under detection limit
297.06	C13 H13 O8	13	13	0	8	0	297.061	NA	NA	NA	NA	8730096	0	0	0	0	NA means under detection limit
297.06	C13 H13 O8	13	13	0	8	0	NA	297.061	NA	NA	NA	0	5509137	0	0	0	NA means under detection limit
297.076	C17 H13 O5	17	13	0	5	0	NA	NA	297.076	NA	NA	0	0	4997799	0	0	NA means under detection limit
297.076	C17 H13 O5	17	13	0	5	0	297.076	NA	NA	NA	NA	4684273	0	0	0	0	NA means under detection limit
297.076	C17 H13 O5	17	13	0	5	0	NA	297.076	NA	NA	NA	0	4688914	0	0	0	NA means under detection limit
297.097	C14 H17 O7	14	17	0	7	0	NA	NA	NA	297.097	NA	0	0	0	23632266	0	NA means under detection limit
297.097	C14 H17 O7	14	17	0	7	0	NA	NA	297.097	NA	NA	0	0	3874474	0	0	NA means under detection limit
297.097	C14 H17 O7	14	17	0	7	0	297.097	NA	NA	NA	NA	5391859	0	0	0	0	NA means under detection limit
297.097	C14 H17 O7	14	17	0	7	0	NA	297.097	NA	NA	NA	0	5713940	0	0	0	NA means under detection limit
297.133	C15 H21 O6	15	21	0	6	0	NA	NA	NA	297.133	NA	0	0	0	2632589	0	NA means under detection limit
297.133	C15 H21 O6	15	21	0	6	0	NA	NA	297.133	NA	NA	0	0	3915950	0	0	NA means under detection limit
297.133	C15 H21 O6	15	21	0	6	0	297.133	NA	NA	NA	NA	4730358	0	0	0	0	NA means under detection limit
297.133	C15 H21 O6	15	21	0	6	0	NA	297.133	NA	NA	NA	0	2859031	0	0	0	NA means under detection limit
297.149	C19 H21 O3	19	21	0	3	0	NA	NA	NA	297.149	NA	0	0	0	2658190	0	NA means under detection limit
297.185	C20 H25 O2	20	25	0	2	0	NA	NA	NA	297.185	NA	0	0	0	11369872	0	NA means under detection limit
297.279	C19 H37 O2	19	37	0	2	0	NA	NA	NA	NA	297.279	0	0	0	0	2526721	NA means under detection limit
297.279	C19 H37 O2	19	37	0	2	0	NA	NA	NA	NA	297.279	0	0	0	0	2850851	NA means under detection limit
297.279	C19 H37 O2	19	37	0	2	0	NA	NA	NA	NA	297.279	0	0	0	0	7402903	NA means under detection limit
298.092	C13 H16 N O7	13	16	1	7	0	298.092	NA	NA	NA	NA	2922048	0	0	0	0	NA means under detection limit
298.31	C19 H40 N O	19	40	1	1	0	NA	NA	NA	298.31	NA	0	0	0	7920088	0	NA means under detection limit
299.04	C12 H11 O9	12	11	0	9	0	NA	NA	NA	299.04	NA	0	0	0	6299141	0	NA means under detection limit
299.055	C16 H11 O6	16	11	0	6	0	299.055	NA	NA	NA	NA	3263114	0	0	0	0	NA means under detection limit
299.076	C13 H15 O8	13	15	0	8	0	NA	NA	NA	299.076	NA	0	0	0	17771014	0	NA means under detection limit
299.076	C13 H15 O8	13	15	0	8	0	NA	NA	299.076	NA	NA	0	0	3043714	0	0	NA means under detection limit
299.076	C13 H15 O8	13	15	0	8	0	299.076	NA	NA	NA	NA	5377675	0	0	0	0	NA means under detection limit
299.076	C13 H15 O8	13	15	0	8	0	NA	299.076	NA	NA	NA	0	2935990	0	0	0	NA means under detection limit
299.091	C17 H15 O5	17	15	0	5	0	NA	NA	299.091	NA	NA	0	0	2933636	0	0	NA means under detection limit
299.113	C14 H19 O7	14	19	0	7	0	NA	NA	NA	299.113	NA	0	0	0	23267848	0	NA means under detection limit
299.113	C14 H19 O7	14	19	0	7	0	NA	NA	299.113	NA	NA	0	0	3447174	0	0	NA means under detection limit
299.113	C14 H19 O7	14	19	0	7	0	299.113	NA	NA	NA	NA	5095054	0	0	0	0	NA means under detection limit
299.113	C14 H19 O7	14	19	0	7	0	NA	299.113	NA	NA	NA	0	4130489	0	0	0	NA means under detection limit
299.164	C19 H23 O3	19	23	0	3	0	NA	NA	NA	299.164	NA	0	0	0	3527692	0	NA means under detection limit
299.201	C20 H27 O2	20	27	0	2	0	NA	NA	NA	299.201	NA	0	0	0	15630862	0	NA means under detection limit
299.258	C18 H35 O3	18	35	0	3	0	NA	NA	NA	NA	299.258	0	0	0	0	4861125	NA means under detection limit
299.258	C18 H35 O3	18	35	0	3	0	NA	NA	NA	NA	299.258	0	0	0	0	2378002	NA means under detection limit
299.294	C19 H39 O2	19	39	0	2	0	NA	NA	NA	NA	299.295	0	0	0	0	2757529	NA means under detection limit
299.294	C19 H39 O2	19	39	0	2	0	NA	NA	NA	NA	299.294	0	0	0	0	2405532	NA means under detection limit
299.294	C19 H39 O2	19	39	0	2	0	NA	NA	NA	NA	299.294	0	0	0	0	3343892	NA means under detection limit
300.108	C13 H18 N O7	13	18	1	7	0	300.108	NA	NA	NA	NA	2517464	0	0	0	0	NA means under detection limit
301.055	C12 H13 O9	12	13	0	9	0	NA	NA	NA	301.055	NA	0	0	0	29903486	0	NA means under detection limit
301.055	C12 H13 O9	12	13	0	9	0	301.055	NA	NA	NA	NA	5066526	0	0	0	0	NA means under detection limit
301.071	C16 H13 O6	16	13	0	6	0	NA	NA	301.071	NA	NA	0	0	2668628	0	0	NA means under detection limit
301.092	C13 H17 O8	13	17	0	8	0	NA	NA	NA	301.092	NA	0	0	0	5749377	0	NA means under detection limit
301.107	C17 H17 O5	17	17	0	5	0	NA	NA	301.107	NA	NA	0	0	5776472	0	0	NA means under detection limit
301.107	C17 H17 O5	17	17	0	5	0	301.107	NA	NA	NA	NA	7264034	0	0	0	0	NA means under detection limit
301.107	C17 H17 O5	17	17	0	5	0	NA	301.107	NA	NA	NA	0	5473619	0	0	0	NA means under detection limit
301.128	C14 H21 O7	14	21	0	7	0	NA	NA	NA	301.128	NA	0	0	0	24353412	0	NA means under detection limit
301.128	C14 H21 O7	14	21	0	7	0	NA	NA	301.128	NA	NA	0	0	10074202	0	0	NA means under detection limit
301.128	C14 H21 O7	14	21	0	7	0	301.128	NA	NA	NA	NA	9137955	0	0	0	0	NA means under detection limit
301.128	C14 H21 O7	14	21	0	7	0	NA	301.128	NA	NA	NA	0	11063636	0	0	0	NA means under detection limit
301.143	C18 H21 O4	18	21	0	4	0	NA	NA	301.143	NA	NA	0	0	3236443	0	0	NA means under detection limit
301.143	C18 H21 O4	18	21	0	4	0	301.143	NA	NA	NA	NA	2801188	0	0	0	0	NA means under detection limit
301.143	C18 H21 O4	18	21	0	4	0	NA	301.143	NA	NA	NA	0	3006293	0	0	0	NA means under detection limit
301.18	C19 H25 O3	19	25	0	3	0	NA	NA	NA	301.18	NA	0	0	0	4102278	0	NA means under detection limit
301.216	C20 H29 O2	20	29	0	2	0	NA	NA	NA	301.216	NA	0	0	0	3577992	0	NA means under detection limit
301.237	C17 H33 O4	17	33	0	4	0	NA	NA	301.237	NA	NA	0	0	3129445	0	0	NA means under detection limit
301.237	C17 H33 O4	17	33	0	4	0	NA	301.237	NA	NA	NA	0	3657052	0	0	0	NA means under detection limit
303.053	C12 H15 O7 S	12	15	0	7	1	NA	NA	NA	303.053	NA	0	0	0	3450359	0	NA means under detection limit
303.086	C16 H15 O6	16	15	0	6	0	NA	NA	NA	303.086	NA	0	0	0	3011321	0	NA means under detection limit
303.086	C16 H15 O6	16	15	0	6	0	NA	NA	303.086	NA	NA	0	0	4406050	0	0	NA means under detection limit
303.086	C16 H15 O6	16	15	0	6	0	303.086	NA	NA	NA	NA	5299121	0	0	0	0	NA means under detection limit
303.086	C16 H15 O6	16	15	0	6	0	NA	303.086	NA	NA	NA	0	4501989	0	0	0	NA means under detection limit
303.123	C17 H19 O5	17	19	0	5	0	NA	NA	303.123	NA	NA	0	0	5338406	0	0	NA means under detection limit
303.123	C17 H19 O5	17	19	0	5	0	303.123	NA	NA	NA	NA	5375924	0	0	0	0	NA means under detection limit
303.123	C17 H19 O5	17	19	0	5	0	NA	303.123	NA	NA	NA	0	4675047	0	0	0	NA means under detection limit
303.159	C18 H23 O4	18	23	0	4	0	NA	NA	NA	303.159	NA	0	0	0	3950845	0	NA means under detection limit
303.159	C18 H23 O4	18	23	0	4	0	NA	NA	303.159	NA	NA	0	0	3424042	0	0	NA means under detection limit
303.159	C18 H23 O4	18	23	0	4	0	303.159	NA	NA	NA	NA	3367862	0	0	0	0	NA means under detection limit
303.159	C18 H23 O4	18	23	0	4	0	NA	303.159	NA	NA	NA	0	2940394	0	0	0	NA means under detection limit
303.195	C19 H27 O3	19	27	0	3	0	NA	NA	NA	303.196	NA	0	0	0	2722304	0	NA means under detection limit
303.232	C20 H31 O2	20	31	0	2	0	NA	NA	NA	303.232	NA	0	0	0	2565890	0	NA means under detection limit
304.118	C16 H18 N O5	16	18	1	5	0	NA	304.118	NA	NA	NA	0	2411055	0	0	0	NA means under detection limit
305.066	C15 H13 O7	15	13	0	7	0	NA	NA	NA	305.066	NA	0	0	0	5403507	0	NA means under detection limit
305.066	C15 H13 O7	15	13	0	7	0	305.066	NA	NA	NA	NA	2967616	0	0	0	0	NA means under detection limit
305.066	C15 H13 O7	15	13	0	7	0	NA	305.066	NA	NA	NA	0	2726003	0	0	0	NA means under detection limit
305.102	C16 H17 O6	16	17	0	6	0	NA	NA	NA	305.102	NA	0	0	0	3528053	0	NA means under detection limit
305.102	C16 H17 O6	16	17	0	6	0	NA	NA	305.102	NA	NA	0	0	6537710	0	0	NA means under detection limit
305.102	C16 H17 O6	16	17	0	6	0	305.102	NA	NA	NA	NA	6234179	0	0	0	0	NA means under detection limit
305.102	C16 H17 O6	16	17	0	6	0	NA	305.102	NA	NA	NA	0	4382325	0	0	0	NA means under detection limit
305.138	C17 H21 O5	17	21	0	5	0	NA	NA	305.138	NA	NA	0	0	4838898	0	0	NA means under detection limit
305.138	C17 H21 O5	17	21	0	5	0	305.138	NA	NA	NA	NA	5438534	0	0	0	0	NA means under detection limit
305.138	C17 H21 O5	17	21	0	5	0	NA	305.138	NA	NA	NA	0	4699256	0	0	0	NA means under detection limit
305.175	C18 H25 O4	18	25	0	4	0	NA	NA	NA	305.175	NA	0	0	0	12698489	0	NA means under detection limit
306.134	C16 H20 N O5	16	20	1	5	0	NA	NA	306.134	NA	NA	0	0	3480150	0	0	NA means under detection limit
306.134	C16 H20 N O5	16	20	1	5	0	306.134	NA	NA	NA	NA	3376783	0	0	0	0	NA means under detection limit
306.134	C16 H20 N O5	16	20	1	5	0	NA	306.134	NA	NA	NA	0	2769087	0	0	0	NA means under detection limit
307.045	C14 H11 O8	14	11	0	8	0	NA	NA	NA	307.045	NA	0	0	0	7206898	0	NA means under detection limit
307.081	C15 H15 O7	15	15	0	7	0	NA	NA	NA	307.081	NA	0	0	0	20188148	0	NA means under detection limit
307.081	C15 H15 O7	15	15	0	7	0	NA	NA	307.081	NA	NA	0	0	9568950	0	0	NA means under detection limit
307.081	C15 H15 O7	15	15	0	7	0	307.081	NA	NA	NA	NA	12046550	0	0	0	0	NA means under detection limit
307.081	C15 H15 O7	15	15	0	7	0	NA	307.081	NA	NA	NA	0	9528066	0	0	0	NA means under detection limit
307.118	C16 H19 O6	16	19	0	6	0	NA	NA	NA	307.118	NA	0	0	0	8111095	0	NA means under detection limit
307.118	C16 H19 O6	16	19	0	6	0	NA	NA	307.118	NA	NA	0	0	6809274	0	0	NA means under detection limit
307.118	C16 H19 O6	16	19	0	6	0	307.118	NA	NA	NA	NA	8990936	0	0	0	0	NA means under detection limit
307.118	C16 H19 O6	16	19	0	6	0	NA	307.118	NA	NA	NA	0	7452421	0	0	0	NA means under detection limit
307.154	C17 H23 O5	17	23	0	5	0	NA	NA	307.154	NA	NA	0	0	3035837	0	0	NA means under detection limit
307.154	C17 H23 O5	17	23	0	5	0	307.154	NA	NA	NA	NA	3225307	0	0	0	0	NA means under detection limit
307.154	C17 H23 O5	17	23	0	5	0	NA	307.154	NA	NA	NA	0	2999560	0	0	0	NA means under detection limit
307.19	C18 H27 O4	18	27	0	4	0	NA	NA	NA	307.19	NA	0	0	0	4038651	0	NA means under detection limit
308.149	C16 H22 N O5	16	22	1	5	0	NA	NA	308.149	NA	NA	0	0	3612451	0	0	NA means under detection limit
308.149	C16 H22 N O5	16	22	1	5	0	308.149	NA	NA	NA	NA	4801831	0	0	0	0	NA means under detection limit
308.149	C16 H22 N O5	16	22	1	5	0	NA	308.149	NA	NA	NA	0	3787087	0	0	0	NA means under detection limit
308.207	C14 H30 N O6	14	30	1	6	0	NA	NA	NA	308.207	NA	0	0	0	2451520	0	NA means under detection limit
309.024	C13 H9 O9	13	9	0	9	0	NA	NA	NA	309.024	NA	0	0	0	3720569	0	NA means under detection limit
309.06	C14 H13 O8	14	13	0	8	0	NA	NA	NA	309.061	NA	0	0	0	24190076	0	NA means under detection limit
309.06	C14 H13 O8	14	13	0	8	0	NA	NA	309.06	NA	NA	0	0	7103361	0	0	NA means under detection limit
309.06	C14 H13 O8	14	13	0	8	0	309.06	NA	NA	NA	NA	9234798	0	0	0	0	NA means under detection limit
309.06	C14 H13 O8	14	13	0	8	0	NA	309.061	NA	NA	NA	0	7453585	0	0	0	NA means under detection limit
309.064	C11 H17 O8 S	11	17	0	8	1	NA	NA	NA	309.064	NA	0	0	0	5056636	0	NA means under detection limit
309.097	C15 H17 O7	15	17	0	7	0	NA	NA	NA	309.097	NA	0	0	0	14423166	0	NA means under detection limit
309.097	C15 H17 O7	15	17	0	7	0	NA	NA	309.097	NA	NA	0	0	7056261	0	0	NA means under detection limit
309.097	C15 H17 O7	15	17	0	7	0	309.097	NA	NA	NA	NA	8026481	0	0	0	0	NA means under detection limit
309.097	C15 H17 O7	15	17	0	7	0	NA	309.097	NA	NA	NA	0	6164372	0	0	0	NA means under detection limit
309.133	C16 H21 O6	16	21	0	6	0	NA	NA	NA	309.133	NA	0	0	0	4253313	0	NA means under detection limit
309.133	C16 H21 O6	16	21	0	6	0	NA	NA	309.133	NA	NA	0	0	5497736	0	0	NA means under detection limit
309.133	C16 H21 O6	16	21	0	6	0	309.133	NA	NA	NA	NA	6946164	0	0	0	0	NA means under detection limit
309.133	C16 H21 O6	16	21	0	6	0	NA	309.133	NA	NA	NA	0	6339478	0	0	0	NA means under detection limit
309.17	C17 H25 O5	17	25	0	5	0	309.17	NA	NA	NA	NA	2490743	0	0	0	0	NA means under detection limit
309.206	C18 H29 O4	18	29	0	4	0	NA	NA	NA	NA	309.206	0	0	0	0	2433436	NA means under detection limit
309.242	C19 H33 O3	19	33	0	3	0	NA	NA	NA	NA	309.242	0	0	0	0	10505118	NA means under detection limit
309.242	C19 H33 O3	19	33	0	3	0	NA	NA	NA	NA	309.242	0	0	0	0	3037577	NA means under detection limit
310.092	C14 H16 N O7	14	16	1	7	0	310.092	NA	NA	NA	NA	2547137	0	0	0	0	NA means under detection limit
310.129	C15 H20 N O6	15	20	1	6	0	310.129	NA	NA	NA	NA	2470852	0	0	0	0	NA means under detection limit
310.129	C15 H20 N O6	15	20	1	6	0	NA	310.129	NA	NA	NA	0	3197408	0	0	0	NA means under detection limit
310.165	C16 H24 N O5	16	24	1	5	0	310.165	NA	NA	NA	NA	3205063	0	0	0	0	NA means under detection limit
310.274	C19 H36 N O2	19	36	1	2	0	NA	NA	NA	310.274	NA	0	0	0	2643669	0	NA means under detection limit
310.31	C20 H40 N O	20	40	1	1	0	NA	NA	NA	310.31	NA	0	0	0	8035544	0	NA means under detection limit
311.04	C13 H11 O9	13	11	0	9	0	NA	NA	NA	311.04	NA	0	0	0	5951760	0	NA means under detection limit
311.076	C14 H15 O8	14	15	0	8	0	NA	NA	NA	311.076	NA	0	0	0	64970004	0	NA means under detection limit
311.076	C14 H15 O8	14	15	0	8	0	NA	NA	311.076	NA	NA	0	0	8533076	0	0	NA means under detection limit
311.076	C14 H15 O8	14	15	0	8	0	311.076	NA	NA	NA	NA	11657747	0	0	0	0	NA means under detection limit
311.076	C14 H15 O8	14	15	0	8	0	NA	311.076	NA	NA	NA	0	8416295	0	0	0	NA means under detection limit
311.091	C18 H15 O5	18	15	0	5	0	NA	NA	311.091	NA	NA	0	0	6601814	0	0	NA means under detection limit
311.091	C18 H15 O5	18	15	0	5	0	311.091	NA	NA	NA	NA	6656533	0	0	0	0	NA means under detection limit
311.091	C18 H15 O5	18	15	0	5	0	NA	311.091	NA	NA	NA	0	5877800	0	0	0	NA means under detection limit
311.113	C15 H19 O7	15	19	0	7	0	NA	NA	NA	311.113	NA	0	0	0	16477461	0	NA means under detection limit
311.113	C15 H19 O7	15	19	0	7	0	NA	NA	311.113	NA	NA	0	0	6955096	0	0	NA means under detection limit
311.113	C15 H19 O7	15	19	0	7	0	311.113	NA	NA	NA	NA	7281174	0	0	0	0	NA means under detection limit
311.113	C15 H19 O7	15	19	0	7	0	NA	311.113	NA	NA	NA	0	5738538	0	0	0	NA means under detection limit
311.128	C19 H19 O4	19	19	0	4	0	311.128	NA	NA	NA	NA	2777623	0	0	0	0	NA means under detection limit
311.149	C16 H23 O6	16	23	0	6	0	NA	NA	NA	311.149	NA	0	0	0	2492696	0	NA means under detection limit
311.149	C16 H23 O6	16	23	0	6	0	NA	311.149	NA	NA	NA	0	2652204	0	0	0	NA means under detection limit
311.164	C20 H23 O3	20	23	0	3	0	NA	NA	NA	NA	311.164	0	0	0	0	2753819	NA means under detection limit
311.164	C20 H23 O3	20	23	0	3	0	NA	NA	NA	NA	311.164	0	0	0	0	2624558	NA means under detection limit
311.164	C20 H23 O3	20	23	0	3	0	NA	NA	NA	NA	311.164	0	0	0	0	3713305	NA means under detection limit
311.164	C20 H23 O3	20	23	0	3	0	NA	NA	311.164	NA	NA	0	0	3328094	0	0	NA means under detection limit
311.222	C18 H31 O4	18	31	0	4	0	NA	311.222	NA	NA	NA	0	2577970	0	0	0	NA means under detection limit
311.258	C19 H35 O3	19	35	0	3	0	NA	NA	NA	NA	311.258	0	0	0	0	2881589	NA means under detection limit
311.294	C20 H39 O2	20	39	0	2	0	NA	NA	NA	NA	311.294	0	0	0	0	4281964	NA means under detection limit
311.294	C20 H39 O2	20	39	0	2	0	NA	NA	NA	NA	311.294	0	0	0	0	4042278	NA means under detection limit
311.294	C20 H39 O2	20	39	0	2	0	NA	NA	NA	NA	311.294	0	0	0	0	2523447	NA means under detection limit
312.108	C14 H18 N O7	14	18	1	7	0	NA	NA	312.108	NA	NA	0	0	3847364	0	0	NA means under detection limit
312.108	C14 H18 N O7	14	18	1	7	0	312.108	NA	NA	NA	NA	4685420	0	0	0	0	NA means under detection limit
312.108	C14 H18 N O7	14	18	1	7	0	NA	312.108	NA	NA	NA	0	2710646	0	0	0	NA means under detection limit
312.29	C19 H38 N O2	19	38	1	2	0	NA	NA	NA	312.29	NA	0	0	0	5894516	0	NA means under detection limit
312.326	C20 H42 N O	20	42	1	1	0	NA	NA	NA	312.326	NA	0	0	0	20155766	0	NA means under detection limit
313.055	C13 H13 O9	13	13	0	9	0	NA	NA	NA	313.055	NA	0	0	0	13837749	0	NA means under detection limit
313.055	C13 H13 O9	13	13	0	9	0	NA	NA	313.055	NA	NA	0	0	2671916	0	0	NA means under detection limit
313.055	C13 H13 O9	13	13	0	9	0	313.055	NA	NA	NA	NA	5390017	0	0	0	0	NA means under detection limit
313.055	C13 H13 O9	13	13	0	9	0	NA	313.055	NA	NA	NA	0	2448577	0	0	0	NA means under detection limit
313.071	C17 H13 O6	17	13	0	6	0	NA	NA	313.071	NA	NA	0	0	2933550	0	0	NA means under detection limit
313.071	C17 H13 O6	17	13	0	6	0	313.071	NA	NA	NA	NA	3493570	0	0	0	0	NA means under detection limit
313.092	C14 H17 O8	14	17	0	8	0	NA	NA	NA	313.092	NA	0	0	0	44514744	0	NA means under detection limit
313.092	C14 H17 O8	14	17	0	8	0	NA	NA	313.092	NA	NA	0	0	5939504	0	0	NA means under detection limit
313.092	C14 H17 O8	14	17	0	8	0	313.092	NA	NA	NA	NA	8276676	0	0	0	0	NA means under detection limit
313.092	C14 H17 O8	14	17	0	8	0	NA	313.092	NA	NA	NA	0	6561988	0	0	0	NA means under detection limit
313.128	C15 H21 O7	15	21	0	7	0	NA	NA	NA	313.128	NA	0	0	0	20508092	0	NA means under detection limit
313.128	C15 H21 O7	15	21	0	7	0	NA	NA	313.128	NA	NA	0	0	6232373	0	0	NA means under detection limit
313.128	C15 H21 O7	15	21	0	7	0	313.128	NA	NA	NA	NA	7253704	0	0	0	0	NA means under detection limit
313.128	C15 H21 O7	15	21	0	7	0	NA	313.128	NA	NA	NA	0	5092551	0	0	0	NA means under detection limit
313.143	C19 H21 O4	19	21	0	4	0	NA	NA	313.143	NA	NA	0	0	2795830	0	0	NA means under detection limit
313.143	C19 H21 O4	19	21	0	4	0	313.143	NA	NA	NA	NA	2932425	0	0	0	0	NA means under detection limit
313.18	C20 H25 O3	20	25	0	3	0	NA	NA	NA	313.18	NA	0	0	0	26594752	0	NA means under detection limit
313.237	C18 H33 O4	18	33	0	4	0	NA	313.237	NA	NA	NA	0	4275408	0	0	0	NA means under detection limit
313.274	C19 H37 O3	19	37	0	3	0	NA	NA	NA	NA	313.274	0	0	0	0	6443333	NA means under detection limit
313.274	C19 H37 O3	19	37	0	3	0	NA	NA	NA	NA	313.274	0	0	0	0	4400853	NA means under detection limit
313.274	C19 H37 O3	19	37	0	3	0	NA	NA	NA	NA	313.274	0	0	0	0	7078099	NA means under detection limit
313.274	C19 H37 O3	19	37	0	3	0	NA	NA	NA	NA	313.274	0	0	0	0	5876680	NA means under detection limit
314.305	C19 H40 N O2	19	40	1	2	0	NA	NA	NA	314.305	NA	0	0	0	2904613	0	NA means under detection limit
314.342	C20 H44 N O	20	44	1	1	0	NA	NA	NA	314.342	NA	0	0	0	8827432	0	NA means under detection limit
315.071	C13 H15 O9	13	15	0	9	0	NA	NA	NA	315.071	NA	0	0	0	55230060	0	NA means under detection limit
315.071	C13 H15 O9	13	15	0	9	0	NA	NA	315.071	NA	NA	0	0	4164115	0	0	NA means under detection limit
315.071	C13 H15 O9	13	15	0	9	0	315.071	NA	NA	NA	NA	7877506	0	0	0	0	NA means under detection limit
315.071	C13 H15 O9	13	15	0	9	0	NA	315.071	NA	NA	NA	0	4504937	0	0	0	NA means under detection limit
315.086	C17 H15 O6	17	15	0	6	0	NA	NA	315.086	NA	NA	0	0	3887637	0	0	NA means under detection limit
315.086	C17 H15 O6	17	15	0	6	0	315.086	NA	NA	NA	NA	3765123	0	0	0	0	NA means under detection limit
315.086	C17 H15 O6	17	15	0	6	0	NA	315.086	NA	NA	NA	0	3785066	0	0	0	NA means under detection limit
315.107	C14 H19 O8	14	19	0	8	0	NA	NA	NA	315.107	NA	0	0	0	13319793	0	NA means under detection limit
315.107	C14 H19 O8	14	19	0	8	0	315.107	NA	NA	NA	NA	2655109	0	0	0	0	NA means under detection limit
315.123	C18 H19 O5	18	19	0	5	0	NA	NA	315.123	NA	NA	0	0	4886041	0	0	NA means under detection limit
315.123	C18 H19 O5	18	19	0	5	0	315.123	NA	NA	NA	NA	5723015	0	0	0	0	NA means under detection limit
315.123	C18 H19 O5	18	19	0	5	0	NA	315.123	NA	NA	NA	0	4656493	0	0	0	NA means under detection limit
315.144	C15 H23 O7	15	23	0	7	0	NA	NA	NA	315.144	NA	0	0	0	2457204	0	NA means under detection limit
315.159	C19 H23 O4	19	23	0	4	0	NA	NA	NA	315.159	NA	0	0	0	5224566	0	NA means under detection limit
315.159	C19 H23 O4	19	23	0	4	0	NA	NA	315.159	NA	NA	0	0	3573789	0	0	NA means under detection limit
315.159	C19 H23 O4	19	23	0	4	0	315.159	NA	NA	NA	NA	3159434	0	0	0	0	NA means under detection limit
315.159	C19 H23 O4	19	23	0	4	0	NA	315.159	NA	NA	NA	0	2608752	0	0	0	NA means under detection limit
315.195	C20 H27 O3	20	27	0	3	0	NA	NA	NA	315.195	NA	0	0	0	24448634	0	NA means under detection limit
315.195	C20 H27 O3	20	27	0	3	0	NA	NA	315.195	NA	NA	0	0	2594338	0	0	NA means under detection limit
315.253	C18 H35 O4	18	35	0	4	0	NA	315.253	NA	NA	NA	0	3681656	0	0	0	NA means under detection limit
317.033	C12 H13 O8 S	12	13	0	8	1	NA	NA	NA	317.033	NA	0	0	0	4187957	0	NA means under detection limit
317.05	C12 H13 O10	12	13	0	10	0	NA	NA	NA	317.05	NA	0	0	0	2434103	0	NA means under detection limit
317.069	C13 H17 O7 S	13	17	0	7	1	NA	NA	NA	317.069	NA	0	0	0	2543929	0	NA means under detection limit
317.087	C13 H17 O9	13	17	0	9	0	NA	NA	NA	317.087	NA	0	0	0	2585403	0	NA means under detection limit
317.102	C17 H17 O6	17	17	0	6	0	NA	NA	NA	317.102	NA	0	0	0	4333373	0	NA means under detection limit
317.102	C17 H17 O6	17	17	0	6	0	NA	NA	317.102	NA	NA	0	0	6100745	0	0	NA means under detection limit
317.102	C17 H17 O6	17	17	0	6	0	317.102	NA	NA	NA	NA	6347862	0	0	0	0	NA means under detection limit
317.102	C17 H17 O6	17	17	0	6	0	NA	317.102	NA	NA	NA	0	5498398	0	0	0	NA means under detection limit
317.123	C14 H21 O8	14	21	0	8	0	NA	NA	NA	317.123	NA	0	0	0	2455871	0	NA means under detection limit
317.138	C18 H21 O5	18	21	0	5	0	NA	NA	317.138	NA	NA	0	0	4511502	0	0	NA means under detection limit
317.138	C18 H21 O5	18	21	0	5	0	317.138	NA	NA	NA	NA	5697626	0	0	0	0	NA means under detection limit
317.138	C18 H21 O5	18	21	0	5	0	NA	317.138	NA	NA	NA	0	5037602	0	0	0	NA means under detection limit
317.175	C19 H25 O4	19	25	0	4	0	NA	NA	NA	317.175	NA	0	0	0	2779973	0	NA means under detection limit
317.175	C19 H25 O4	19	25	0	4	0	NA	NA	317.175	NA	NA	0	0	2859282	0	0	NA means under detection limit
317.175	C19 H25 O4	19	25	0	4	0	NA	317.175	NA	NA	NA	0	2924581	0	0	0	NA means under detection limit
317.211	C20 H29 O3	20	29	0	3	0	NA	NA	NA	317.211	NA	0	0	0	18026312	0	NA means under detection limit
318.134	C17 H20 N O5	17	20	1	5	0	NA	NA	318.134	NA	NA	0	0	3025805	0	0	NA means under detection limit
318.134	C17 H20 N O5	17	20	1	5	0	318.134	NA	NA	NA	NA	2704075	0	0	0	0	NA means under detection limit
318.134	C17 H20 N O5	17	20	1	5	0	NA	318.134	NA	NA	NA	0	3307649	0	0	0	NA means under detection limit
319.045	C15 H11 O8	15	11	0	8	0	NA	NA	NA	319.045	NA	0	0	0	2915356	0	NA means under detection limit
319.081	C16 H15 O7	16	15	0	7	0	NA	NA	NA	319.081	NA	0	0	0	7960608	0	NA means under detection limit
319.081	C16 H15 O7	16	15	0	7	0	NA	NA	319.081	NA	NA	0	0	3915273	0	0	NA means under detection limit
319.081	C16 H15 O7	16	15	0	7	0	319.081	NA	NA	NA	NA	5193019	0	0	0	0	NA means under detection limit
319.081	C16 H15 O7	16	15	0	7	0	NA	319.081	NA	NA	NA	0	4805343	0	0	0	NA means under detection limit
319.118	C17 H19 O6	17	19	0	6	0	NA	NA	NA	319.118	NA	0	0	0	3132964	0	NA means under detection limit
319.118	C17 H19 O6	17	19	0	6	0	NA	NA	319.118	NA	NA	0	0	6626318	0	0	NA means under detection limit
319.118	C17 H19 O6	17	19	0	6	0	319.118	NA	NA	NA	NA	7224639	0	0	0	0	NA means under detection limit
319.118	C17 H19 O6	17	19	0	6	0	NA	319.118	NA	NA	NA	0	6464227	0	0	0	NA means under detection limit
319.154	C18 H23 O5	18	23	0	5	0	NA	NA	319.154	NA	NA	0	0	5476371	0	0	NA means under detection limit
319.154	C18 H23 O5	18	23	0	5	0	319.154	NA	NA	NA	NA	5629252	0	0	0	0	NA means under detection limit
319.154	C18 H23 O5	18	23	0	5	0	NA	319.154	NA	NA	NA	0	4869863	0	0	0	NA means under detection limit
319.19	C19 H27 O4	19	27	0	4	0	NA	NA	NA	319.19	NA	0	0	0	2644781	0	NA means under detection limit
319.19	C19 H27 O4	19	27	0	4	0	NA	NA	319.19	NA	NA	0	0	2441240	0	0	NA means under detection limit
320.113	C16 H18 N O6	16	18	1	6	0	NA	NA	320.113	NA	NA	0	0	2418326	0	0	NA means under detection limit
320.113	C16 H18 N O6	16	18	1	6	0	320.113	NA	NA	NA	NA	2880955	0	0	0	0	NA means under detection limit
320.149	C17 H22 N O5	17	22	1	5	0	NA	NA	320.149	NA	NA	0	0	3913371	0	0	NA means under detection limit
320.149	C17 H22 N O5	17	22	1	5	0	320.149	NA	NA	NA	NA	3591616	0	0	0	0	NA means under detection limit
320.149	C17 H22 N O5	17	22	1	5	0	NA	320.149	NA	NA	NA	0	3310415	0	0	0	NA means under detection limit
321.06	C15 H13 O8	15	13	0	8	0	NA	NA	NA	321.061	NA	0	0	0	12130590	0	NA means under detection limit
321.06	C15 H13 O8	15	13	0	8	0	NA	NA	321.061	NA	NA	0	0	11245852	0	0	NA means under detection limit
321.06	C15 H13 O8	15	13	0	8	0	321.061	NA	NA	NA	NA	13878840	0	0	0	0	NA means under detection limit
321.06	C15 H13 O8	15	13	0	8	0	NA	321.06	NA	NA	NA	0	11300786	0	0	0	NA means under detection limit
321.097	C16 H17 O7	16	17	0	7	0	NA	NA	NA	321.097	NA	0	0	0	27578660	0	NA means under detection limit
321.097	C16 H17 O7	16	17	0	7	0	NA	NA	321.097	NA	NA	0	0	12386593	0	0	NA means under detection limit
321.097	C16 H17 O7	16	17	0	7	0	321.097	NA	NA	NA	NA	16014908	0	0	0	0	NA means under detection limit
321.097	C16 H17 O7	16	17	0	7	0	NA	321.097	NA	NA	NA	0	13363126	0	0	0	NA means under detection limit
321.133	C17 H21 O6	17	21	0	6	0	NA	NA	NA	321.133	NA	0	0	0	4368681	0	NA means under detection limit
321.133	C17 H21 O6	17	21	0	6	0	NA	NA	321.133	NA	NA	0	0	7986471	0	0	NA means under detection limit
321.133	C17 H21 O6	17	21	0	6	0	321.133	NA	NA	NA	NA	7773762	0	0	0	0	NA means under detection limit
321.133	C17 H21 O6	17	21	0	6	0	NA	321.133	NA	NA	NA	0	6662074	0	0	0	NA means under detection limit
321.17	C18 H25 O5	18	25	0	5	0	NA	NA	321.17	NA	NA	0	0	2520364	0	0	NA means under detection limit
321.17	C18 H25 O5	18	25	0	5	0	321.17	NA	NA	NA	NA	3358278	0	0	0	0	NA means under detection limit
321.17	C18 H25 O5	18	25	0	5	0	NA	321.17	NA	NA	NA	0	2737598	0	0	0	NA means under detection limit
322.096	C12 H20 N O7 S	12	20	1	7	1	NA	NA	NA	322.095	NA	0	0	0	6817200	0	NA means under detection limit
322.129	C16 H20 N O6	16	20	1	6	0	322.128	NA	NA	NA	NA	3333835	0	0	0	0	NA means under detection limit
322.129	C16 H20 N O6	16	20	1	6	0	NA	322.129	NA	NA	NA	0	2428460	0	0	0	NA means under detection limit
322.165	C17 H24 N O5	17	24	1	5	0	NA	NA	322.165	NA	NA	0	0	2519486	0	0	NA means under detection limit
322.165	C17 H24 N O5	17	24	1	5	0	NA	322.165	NA	NA	NA	0	2972209	0	0	0	NA means under detection limit
322.31	C21 H40 N O	21	40	1	1	0	NA	NA	NA	322.31	NA	0	0	0	3428815	0	NA means under detection limit
323.04	C14 H11 O9	14	11	0	9	0	NA	NA	NA	323.04	NA	0	0	0	5015100	0	NA means under detection limit
323.076	C15 H15 O8	15	15	0	8	0	NA	NA	NA	323.076	NA	0	0	0	26042946	0	NA means under detection limit
323.076	C15 H15 O8	15	15	0	8	0	NA	NA	323.076	NA	NA	0	0	9550409	0	0	NA means under detection limit
323.076	C15 H15 O8	15	15	0	8	0	323.076	NA	NA	NA	NA	11800405	0	0	0	0	NA means under detection limit
323.076	C15 H15 O8	15	15	0	8	0	NA	323.076	NA	NA	NA	0	8216734	0	0	0	NA means under detection limit
323.08	C12 H19 O8 S	12	19	0	8	1	NA	NA	NA	323.08	NA	0	0	0	3109442	0	NA means under detection limit
323.113	C16 H19 O7	16	19	0	7	0	NA	NA	NA	323.113	NA	0	0	0	12057159	0	NA means under detection limit
323.113	C16 H19 O7	16	19	0	7	0	NA	NA	323.113	NA	NA	0	0	8874575	0	0	NA means under detection limit
323.113	C16 H19 O7	16	19	0	7	0	323.113	NA	NA	NA	NA	8290138	0	0	0	0	NA means under detection limit
323.113	C16 H19 O7	16	19	0	7	0	NA	323.113	NA	NA	NA	0	7208099	0	0	0	NA means under detection limit
323.149	C17 H23 O6	17	23	0	6	0	NA	NA	323.149	NA	NA	0	0	4099669	0	0	NA means under detection limit
323.149	C17 H23 O6	17	23	0	6	0	323.149	NA	NA	NA	NA	5221216	0	0	0	0	NA means under detection limit
323.149	C17 H23 O6	17	23	0	6	0	NA	323.149	NA	NA	NA	0	4230311	0	0	0	NA means under detection limit
323.185	C18 H27 O5	18	27	0	5	0	NA	323.185	NA	NA	NA	0	2512044	0	0	0	NA means under detection limit
323.258	C20 H35 O3	20	35	0	3	0	NA	NA	NA	NA	323.258	0	0	0	0	3129958	NA means under detection limit
323.258	C20 H35 O3	20	35	0	3	0	NA	NA	NA	NA	323.258	0	0	0	0	2619760	NA means under detection limit
323.258	C20 H35 O3	20	35	0	3	0	NA	NA	NA	NA	323.258	0	0	0	0	3397301	NA means under detection limit
324.108	C15 H18 N O7	15	18	1	7	0	NA	NA	324.108	NA	NA	0	0	3689197	0	0	NA means under detection limit
324.108	C15 H18 N O7	15	18	1	7	0	324.108	NA	NA	NA	NA	4233202	0	0	0	0	NA means under detection limit
324.108	C15 H18 N O7	15	18	1	7	0	NA	324.108	NA	NA	NA	0	2764576	0	0	0	NA means under detection limit
324.144	C16 H22 N O6	16	22	1	6	0	324.144	NA	NA	NA	NA	2606584	0	0	0	0	NA means under detection limit
324.29	C20 H38 N O2	20	38	1	2	0	NA	NA	NA	324.29	NA	0	0	0	3989249	0	NA means under detection limit
324.326	C21 H42 N O	21	42	1	1	0	NA	NA	NA	324.326	NA	0	0	0	9979654	0	NA means under detection limit
325.055	C14 H13 O9	14	13	0	9	0	NA	NA	NA	325.055	NA	0	0	0	40625024	0	NA means under detection limit
325.055	C14 H13 O9	14	13	0	9	0	NA	NA	325.055	NA	NA	0	0	3350921	0	0	NA means under detection limit
325.055	C14 H13 O9	14	13	0	9	0	325.055	NA	NA	NA	NA	4149898	0	0	0	0	NA means under detection limit
325.055	C14 H13 O9	14	13	0	9	0	NA	325.055	NA	NA	NA	0	2685853	0	0	0	NA means under detection limit
325.092	C15 H17 O8	15	17	0	8	0	NA	NA	NA	325.092	NA	0	0	0	77456264	0	NA means under detection limit
325.092	C15 H17 O8	15	17	0	8	0	NA	NA	325.092	NA	NA	0	0	13134735	0	0	NA means under detection limit
325.092	C15 H17 O8	15	17	0	8	0	325.092	NA	NA	NA	NA	16175248	0	0	0	0	NA means under detection limit
325.092	C15 H17 O8	15	17	0	8	0	NA	325.092	NA	NA	NA	0	13138338	0	0	0	NA means under detection limit
325.107	C19 H17 O5	19	17	0	5	0	NA	NA	325.107	NA	NA	0	0	3408273	0	0	NA means under detection limit
325.107	C19 H17 O5	19	17	0	5	0	325.107	NA	NA	NA	NA	4007058	0	0	0	0	NA means under detection limit
325.107	C19 H17 O5	19	17	0	5	0	NA	325.107	NA	NA	NA	0	3148708	0	0	0	NA means under detection limit
325.128	C16 H21 O7	16	21	0	7	0	NA	NA	NA	325.128	NA	0	0	0	12020620	0	NA means under detection limit
325.128	C16 H21 O7	16	21	0	7	0	NA	NA	325.128	NA	NA	0	0	5690261	0	0	NA means under detection limit
325.128	C16 H21 O7	16	21	0	7	0	325.128	NA	NA	NA	NA	6152342	0	0	0	0	NA means under detection limit
325.128	C16 H21 O7	16	21	0	7	0	NA	325.128	NA	NA	NA	0	5415335	0	0	0	NA means under detection limit
325.31	C21 H41 O2	21	41	0	2	0	NA	NA	NA	NA	325.31	0	0	0	0	2505908	NA means under detection limit
325.31	C21 H41 O2	21	41	0	2	0	NA	NA	NA	NA	325.31	0	0	0	0	2697408	NA means under detection limit
326.123	C15 H20 N O7	15	20	1	7	0	NA	NA	326.123	NA	NA	0	0	4202559	0	0	NA means under detection limit
326.123	C15 H20 N O7	15	20	1	7	0	326.123	NA	NA	NA	NA	4373821	0	0	0	0	NA means under detection limit
326.123	C15 H20 N O7	15	20	1	7	0	NA	326.123	NA	NA	NA	0	4156976	0	0	0	NA means under detection limit
326.217	C14 H32 N O7	14	32	1	7	0	NA	NA	NA	326.217	NA	0	0	0	4893769	0	NA means under detection limit
326.305	C20 H40 N O2	20	40	1	2	0	NA	NA	NA	326.305	NA	0	0	0	6215769	0	NA means under detection limit
326.342	C21 H44 N O	21	44	1	1	0	NA	NA	NA	326.342	NA	0	0	0	3709024	0	NA means under detection limit
327.035	C13 H11 O10	13	11	0	10	0	NA	NA	NA	327.035	NA	0	0	0	10503390	0	NA means under detection limit
327.05	C17 H11 O7	17	11	0	7	0	NA	NA	327.05	NA	NA	0	0	3152097	0	0	NA means under detection limit
327.05	C17 H11 O7	17	11	0	7	0	NA	327.05	NA	NA	NA	0	2524853	0	0	0	NA means under detection limit
327.071	C14 H15 O9	14	15	0	9	0	NA	NA	NA	327.071	NA	0	0	0	30794980	0	NA means under detection limit
327.071	C14 H15 O9	14	15	0	9	0	NA	NA	327.071	NA	NA	0	0	6229221	0	0	NA means under detection limit
327.071	C14 H15 O9	14	15	0	9	0	327.071	NA	NA	NA	NA	8929762	0	0	0	0	NA means under detection limit
327.071	C14 H15 O9	14	15	0	9	0	NA	327.071	NA	NA	NA	0	6286008	0	0	0	NA means under detection limit
327.086	C18 H15 O6	18	15	0	6	0	NA	NA	327.086	NA	NA	0	0	2660584	0	0	NA means under detection limit
327.086	C18 H15 O6	18	15	0	6	0	NA	327.086	NA	NA	NA	0	2996410	0	0	0	NA means under detection limit
327.107	C15 H19 O8	15	19	0	8	0	NA	NA	NA	327.107	NA	0	0	0	31274220	0	NA means under detection limit
327.107	C15 H19 O8	15	19	0	8	0	NA	NA	327.107	NA	NA	0	0	8502507	0	0	NA means under detection limit
327.107	C15 H19 O8	15	19	0	8	0	327.107	NA	NA	NA	NA	10320360	0	0	0	0	NA means under detection limit
327.107	C15 H19 O8	15	19	0	8	0	NA	327.107	NA	NA	NA	0	7862973	0	0	0	NA means under detection limit
327.123	C19 H19 O5	19	19	0	5	0	NA	NA	327.123	NA	NA	0	0	2960622	0	0	NA means under detection limit
327.123	C19 H19 O5	19	19	0	5	0	327.123	NA	NA	NA	NA	2810859	0	0	0	0	NA means under detection limit
327.144	C16 H23 O7	16	23	0	7	0	NA	NA	NA	327.144	NA	0	0	0	16313586	0	NA means under detection limit
327.144	C16 H23 O7	16	23	0	7	0	NA	NA	327.144	NA	NA	0	0	4770034	0	0	NA means under detection limit
327.144	C16 H23 O7	16	23	0	7	0	327.144	NA	NA	NA	NA	5199343	0	0	0	0	NA means under detection limit
327.144	C16 H23 O7	16	23	0	7	0	NA	327.144	NA	NA	NA	0	4430531	0	0	0	NA means under detection limit
327.159	C20 H23 O4	20	23	0	4	0	NA	NA	NA	327.159	NA	0	0	0	2798325	0	NA means under detection limit
327.159	C20 H23 O4	20	23	0	4	0	NA	NA	327.159	NA	NA	0	0	3055861	0	0	NA means under detection limit
327.159	C20 H23 O4	20	23	0	4	0	327.159	NA	NA	NA	NA	3291121	0	0	0	0	NA means under detection limit
327.253	C19 H35 O4	19	35	0	4	0	NA	NA	NA	NA	327.253	0	0	0	0	5584134	NA means under detection limit
327.253	C19 H35 O4	19	35	0	4	0	NA	NA	NA	NA	327.253	0	0	0	0	5086722	NA means under detection limit
327.253	C19 H35 O4	19	35	0	4	0	NA	NA	NA	NA	327.253	0	0	0	0	7253715	NA means under detection limit
327.253	C19 H35 O4	19	35	0	4	0	NA	NA	NA	NA	327.253	0	0	0	0	3184390	NA means under detection limit
327.289	C20 H39 O3	20	39	0	3	0	NA	NA	NA	NA	327.289	0	0	0	0	3112664	NA means under detection limit
328.321	C20 H42 N O2	20	42	1	2	0	NA	NA	NA	328.321	NA	0	0	0	8934866	0	NA means under detection limit
329.087	C14 H17 O9	14	17	0	9	0	NA	NA	NA	329.087	NA	0	0	0	54134376	0	NA means under detection limit
329.087	C14 H17 O9	14	17	0	9	0	NA	NA	329.087	NA	NA	0	0	6256216	0	0	NA means under detection limit
329.087	C14 H17 O9	14	17	0	9	0	329.087	NA	NA	NA	NA	8876885	0	0	0	0	NA means under detection limit
329.087	C14 H17 O9	14	17	0	9	0	NA	329.087	NA	NA	NA	0	6584297	0	0	0	NA means under detection limit
329.102	C18 H17 O6	18	17	0	6	0	NA	NA	329.102	NA	NA	0	0	7165531	0	0	NA means under detection limit
329.102	C18 H17 O6	18	17	0	6	0	329.102	NA	NA	NA	NA	8440664	0	0	0	0	NA means under detection limit
329.102	C18 H17 O6	18	17	0	6	0	NA	329.102	NA	NA	NA	0	7032812	0	0	0	NA means under detection limit
329.123	C15 H21 O8	15	21	0	8	0	NA	NA	NA	329.123	NA	0	0	0	9010800	0	NA means under detection limit
329.138	C19 H21 O5	19	21	0	5	0	NA	NA	329.138	NA	NA	0	0	3356257	0	0	NA means under detection limit
329.138	C19 H21 O5	19	21	0	5	0	329.138	NA	NA	NA	NA	4032351	0	0	0	0	NA means under detection limit
329.138	C19 H21 O5	19	21	0	5	0	NA	329.138	NA	NA	NA	0	4041713	0	0	0	NA means under detection limit
329.175	C20 H25 O4	20	25	0	4	0	NA	NA	NA	329.175	NA	0	0	0	4649083	0	NA means under detection limit
329.175	C20 H25 O4	20	25	0	4	0	NA	NA	329.175	NA	NA	0	0	3264104	0	0	NA means under detection limit
329.175	C20 H25 O4	20	25	0	4	0	NA	329.175	NA	NA	NA	0	2614775	0	0	0	NA means under detection limit
329.211	C21 H29 O3	21	29	0	3	0	NA	NA	NA	329.211	NA	0	0	0	3513986	0	NA means under detection limit
329.269	C19 H37 O4	19	37	0	4	0	329.269	NA	NA	NA	NA	2779000	0	0	0	0	NA means under detection limit
329.269	C19 H37 O4	19	37	0	4	0	NA	329.269	NA	NA	NA	0	2998790	0	0	0	NA means under detection limit
330.337	C20 H44 N O2	20	44	1	2	0	NA	NA	NA	330.337	NA	0	0	0	10565482	0	NA means under detection limit
331.048	C13 H15 O8 S	13	15	0	8	1	NA	NA	NA	331.048	NA	0	0	0	5160961	0	NA means under detection limit
331.066	C13 H15 O10	13	15	0	10	0	NA	NA	NA	331.066	NA	0	0	0	7618565	0	NA means under detection limit
331.081	C17 H15 O7	17	15	0	7	0	NA	NA	NA	331.081	NA	0	0	0	2450952	0	NA means under detection limit
331.081	C17 H15 O7	17	15	0	7	0	NA	NA	331.081	NA	NA	0	0	2952667	0	0	NA means under detection limit
331.081	C17 H15 O7	17	15	0	7	0	331.081	NA	NA	NA	NA	4050144	0	0	0	0	NA means under detection limit
331.081	C17 H15 O7	17	15	0	7	0	NA	331.081	NA	NA	NA	0	3384108	0	0	0	NA means under detection limit
331.102	C14 H19 O9	14	19	0	9	0	NA	NA	NA	331.102	NA	0	0	0	21760012	0	NA means under detection limit
331.118	C18 H19 O6	18	19	0	6	0	NA	NA	NA	331.118	NA	0	0	0	2672656	0	NA means under detection limit
331.118	C18 H19 O6	18	19	0	6	0	NA	NA	331.118	NA	NA	0	0	5418979	0	0	NA means under detection limit
331.118	C18 H19 O6	18	19	0	6	0	331.118	NA	NA	NA	NA	5645543	0	0	0	0	NA means under detection limit
331.118	C18 H19 O6	18	19	0	6	0	NA	331.118	NA	NA	NA	0	5901618	0	0	0	NA means under detection limit
331.139	C15 H23 O8	15	23	0	8	0	NA	NA	NA	331.139	NA	0	0	0	3412500	0	NA means under detection limit
331.154	C19 H23 O5	19	23	0	5	0	NA	NA	331.154	NA	NA	0	0	4474858	0	0	NA means under detection limit
331.154	C19 H23 O5	19	23	0	5	0	331.154	NA	NA	NA	NA	4191471	0	0	0	0	NA means under detection limit
331.154	C19 H23 O5	19	23	0	5	0	NA	331.154	NA	NA	NA	0	3235128	0	0	0	NA means under detection limit
331.19	C20 H27 O4	20	27	0	4	0	NA	NA	NA	331.19	NA	0	0	0	9820191	0	NA means under detection limit
332.149	C18 H22 N O5	18	22	1	5	0	NA	NA	332.149	NA	NA	0	0	2471091	0	0	NA means under detection limit
333.049	C9 H17 O11 S	9	17	0	11	1	NA	NA	333.048	NA	NA	0	0	2778477	0	0	NA means under detection limit
333.06	C16 H13 O8	16	13	0	8	0	NA	NA	NA	333.061	NA	0	0	0	6709696	0	NA means under detection limit
333.097	C17 H17 O7	17	17	0	7	0	NA	NA	NA	333.097	NA	0	0	0	4927944	0	NA means under detection limit
333.097	C17 H17 O7	17	17	0	7	0	NA	NA	333.097	NA	NA	0	0	6357368	0	0	NA means under detection limit
333.097	C17 H17 O7	17	17	0	7	0	333.097	NA	NA	NA	NA	6282887	0	0	0	0	NA means under detection limit
333.097	C17 H17 O7	17	17	0	7	0	NA	333.097	NA	NA	NA	0	4937351	0	0	0	NA means under detection limit
333.133	C18 H21 O6	18	21	0	6	0	NA	NA	333.133	NA	NA	0	0	7610751	0	0	NA means under detection limit
333.133	C18 H21 O6	18	21	0	6	0	333.133	NA	NA	NA	NA	7753359	0	0	0	0	NA means under detection limit
333.133	C18 H21 O6	18	21	0	6	0	NA	333.133	NA	NA	NA	0	6082190	0	0	0	NA means under detection limit
333.17	C19 H25 O5	19	25	0	5	0	NA	NA	333.17	NA	NA	0	0	2635655	0	0	NA means under detection limit
333.17	C19 H25 O5	19	25	0	5	0	333.17	NA	NA	NA	NA	3487383	0	0	0	0	NA means under detection limit
333.17	C19 H25 O5	19	25	0	5	0	NA	333.17	NA	NA	NA	0	3422868	0	0	0	NA means under detection limit
333.206	C20 H29 O4	20	29	0	4	0	NA	NA	NA	333.206	NA	0	0	0	9421281	0	NA means under detection limit
334.129	C17 H20 N O6	17	20	1	6	0	NA	NA	334.129	NA	NA	0	0	3874386	0	0	NA means under detection limit
334.129	C17 H20 N O6	17	20	1	6	0	334.129	NA	NA	NA	NA	3914601	0	0	0	0	NA means under detection limit
334.129	C17 H20 N O6	17	20	1	6	0	NA	334.129	NA	NA	NA	0	3071297	0	0	0	NA means under detection limit
334.165	C18 H24 N O5	18	24	1	5	0	NA	NA	334.165	NA	NA	0	0	2523738	0	0	NA means under detection limit
334.165	C18 H24 N O5	18	24	1	5	0	334.165	NA	NA	NA	NA	3162994	0	0	0	0	NA means under detection limit
335.04	C15 H11 O9	15	11	0	9	0	NA	NA	NA	335.04	NA	0	0	0	4046739	0	NA means under detection limit
335.076	C16 H15 O8	16	15	0	8	0	NA	NA	NA	335.076	NA	0	0	0	15498140	0	NA means under detection limit
335.076	C16 H15 O8	16	15	0	8	0	NA	NA	335.076	NA	NA	0	0	8147743	0	0	NA means under detection limit
335.076	C16 H15 O8	16	15	0	8	0	335.076	NA	NA	NA	NA	10061887	0	0	0	0	NA means under detection limit
335.076	C16 H15 O8	16	15	0	8	0	NA	335.076	NA	NA	NA	0	8312816	0	0	0	NA means under detection limit
335.08	C13 H19 O8 S	13	19	0	8	1	NA	NA	NA	335.08	NA	0	0	0	19696540	0	NA means under detection limit
335.113	C17 H19 O7	17	19	0	7	0	NA	NA	NA	335.113	NA	0	0	0	14914468	0	NA means under detection limit
335.113	C17 H19 O7	17	19	0	7	0	NA	NA	335.113	NA	NA	0	0	11522855	0	0	NA means under detection limit
335.113	C17 H19 O7	17	19	0	7	0	335.113	NA	NA	NA	NA	13918279	0	0	0	0	NA means under detection limit
335.113	C17 H19 O7	17	19	0	7	0	NA	335.113	NA	NA	NA	0	10250230	0	0	0	NA means under detection limit
335.149	C18 H23 O6	18	23	0	6	0	NA	NA	335.149	NA	NA	0	0	6528815	0	0	NA means under detection limit
335.149	C18 H23 O6	18	23	0	6	0	335.149	NA	NA	NA	NA	6676559	0	0	0	0	NA means under detection limit
335.149	C18 H23 O6	18	23	0	6	0	NA	335.149	NA	NA	NA	0	6135805	0	0	0	NA means under detection limit
335.185	C19 H27 O5	19	27	0	5	0	NA	NA	335.185	NA	NA	0	0	2550583	0	0	NA means under detection limit
335.222	C20 H31 O4	20	31	0	4	0	NA	NA	NA	335.222	NA	0	0	0	2702783	0	NA means under detection limit
335.294	C22 H39 O2	22	39	0	2	0	NA	NA	NA	NA	335.294	0	0	0	0	2579056	NA means under detection limit
336.108	C16 H18 N O7	16	18	1	7	0	NA	NA	336.108	NA	NA	0	0	3275779	0	0	NA means under detection limit
336.108	C16 H18 N O7	16	18	1	7	0	336.108	NA	NA	NA	NA	3886380	0	0	0	0	NA means under detection limit
336.108	C16 H18 N O7	16	18	1	7	0	NA	336.108	NA	NA	NA	0	2953906	0	0	0	NA means under detection limit
336.111	C13 H22 N O7 S	13	22	1	7	1	NA	NA	NA	336.111	NA	0	0	0	17771674	0	NA means under detection limit
336.144	C17 H22 N O6	17	22	1	6	0	336.144	NA	NA	NA	NA	3551541	0	0	0	0	NA means under detection limit
336.144	C17 H22 N O6	17	22	1	6	0	NA	336.144	NA	NA	NA	0	3285177	0	0	0	NA means under detection limit
336.181	C18 H26 N O5	18	26	1	5	0	NA	336.18	NA	NA	NA	0	2488512	0	0	0	NA means under detection limit
336.326	C22 H42 N O	22	42	1	1	0	NA	NA	NA	336.326	NA	0	0	0	2709200	0	NA means under detection limit
336.326	C22 H42 N O	22	42	1	1	0	NA	NA	336.326	NA	NA	0	0	6887476	0	0	NA means under detection limit
336.326	C22 H42 N O	22	42	1	1	0	336.326	NA	NA	NA	NA	5430624	0	0	0	0	NA means under detection limit
336.326	C22 H42 N O	22	42	1	1	0	NA	336.326	NA	NA	NA	0	6784220	0	0	0	NA means under detection limit
337.055	C15 H13 O9	15	13	0	9	0	NA	NA	NA	337.055	NA	0	0	0	16407945	0	NA means under detection limit
337.055	C15 H13 O9	15	13	0	9	0	NA	NA	337.055	NA	NA	0	0	5433561	0	0	NA means under detection limit
337.055	C15 H13 O9	15	13	0	9	0	337.055	NA	NA	NA	NA	8112652	0	0	0	0	NA means under detection limit
337.055	C15 H13 O9	15	13	0	9	0	NA	337.055	NA	NA	NA	0	5609834	0	0	0	NA means under detection limit
337.092	C16 H17 O8	16	17	0	8	0	NA	NA	NA	337.092	NA	0	0	0	25808274	0	NA means under detection limit
337.092	C16 H17 O8	16	17	0	8	0	NA	NA	337.092	NA	NA	0	0	9876705	0	0	NA means under detection limit
337.092	C16 H17 O8	16	17	0	8	0	337.092	NA	NA	NA	NA	13222421	0	0	0	0	NA means under detection limit
337.092	C16 H17 O8	16	17	0	8	0	NA	337.092	NA	NA	NA	0	9630065	0	0	0	NA means under detection limit
337.128	C17 H21 O7	17	21	0	7	0	NA	NA	NA	337.128	NA	0	0	0	8187292	0	NA means under detection limit
337.128	C17 H21 O7	17	21	0	7	0	NA	NA	337.128	NA	NA	0	0	7648490	0	0	NA means under detection limit
337.128	C17 H21 O7	17	21	0	7	0	337.128	NA	NA	NA	NA	8630813	0	0	0	0	NA means under detection limit
337.128	C17 H21 O7	17	21	0	7	0	NA	337.128	NA	NA	NA	0	6835576	0	0	0	NA means under detection limit
337.165	C18 H25 O6	18	25	0	6	0	NA	NA	337.165	NA	NA	0	0	3302130	0	0	NA means under detection limit
337.165	C18 H25 O6	18	25	0	6	0	337.165	NA	NA	NA	NA	3950118	0	0	0	0	NA means under detection limit
337.165	C18 H25 O6	18	25	0	6	0	NA	337.164	NA	NA	NA	0	3226495	0	0	0	NA means under detection limit
337.274	C21 H37 O3	21	37	0	3	0	NA	NA	NA	NA	337.274	0	0	0	0	2558731	NA means under detection limit
337.274	C21 H37 O3	21	37	0	3	0	NA	NA	NA	NA	337.274	0	0	0	0	2839104	NA means under detection limit
337.274	C21 H37 O3	21	37	0	3	0	NA	NA	NA	NA	337.274	0	0	0	0	3277717	NA means under detection limit
338.123	C16 H20 N O7	16	20	1	7	0	NA	NA	338.123	NA	NA	0	0	4101582	0	0	NA means under detection limit
338.123	C16 H20 N O7	16	20	1	7	0	338.123	NA	NA	NA	NA	5990158	0	0	0	0	NA means under detection limit
338.123	C16 H20 N O7	16	20	1	7	0	NA	338.123	NA	NA	NA	0	4050493	0	0	0	NA means under detection limit
338.305	C21 H40 N O2	21	40	1	2	0	NA	NA	NA	338.305	NA	0	0	0	4123341	0	NA means under detection limit
338.342	C22 H44 N O	22	44	1	1	0	NA	NA	NA	NA	338.342	0	0	0	0	9424385	NA means under detection limit
338.342	C22 H44 N O	22	44	1	1	0	NA	NA	NA	NA	338.342	0	0	0	0	7582531	NA means under detection limit
338.342	C22 H44 N O	22	44	1	1	0	NA	NA	NA	NA	338.342	0	0	0	0	9452137	NA means under detection limit
338.342	C22 H44 N O	22	44	1	1	0	NA	NA	NA	NA	338.342	0	0	0	0	14503639	NA means under detection limit
339.035	C14 H11 O10	14	11	0	10	0	NA	NA	NA	339.035	NA	0	0	0	5062543	0	NA means under detection limit
339.035	C14 H11 O10	14	11	0	10	0	339.035	NA	NA	NA	NA	2580974	0	0	0	0	NA means under detection limit
339.071	C15 H15 O9	15	15	0	9	0	NA	NA	NA	339.071	NA	0	0	0	82440088	0	NA means under detection limit
339.071	C15 H15 O9	15	15	0	9	0	NA	NA	339.071	NA	NA	0	0	13844140	0	0	NA means under detection limit
339.071	C15 H15 O9	15	15	0	9	0	339.071	NA	NA	NA	NA	19610614	0	0	0	0	NA means under detection limit
339.071	C15 H15 O9	15	15	0	9	0	NA	339.071	NA	NA	NA	0	14394109	0	0	0	NA means under detection limit
339.107	C16 H19 O8	16	19	0	8	0	NA	NA	NA	339.107	NA	0	0	0	87273376	0	NA means under detection limit
339.107	C16 H19 O8	16	19	0	8	0	NA	NA	339.107	NA	NA	0	0	17485492	0	0	NA means under detection limit
339.107	C16 H19 O8	16	19	0	8	0	339.107	NA	NA	NA	NA	24665088	0	0	0	0	NA means under detection limit
339.107	C16 H19 O8	16	19	0	8	0	NA	339.107	NA	NA	NA	0	18950916	0	0	0	NA means under detection limit
339.144	C17 H23 O7	17	23	0	7	0	NA	NA	NA	339.144	NA	0	0	0	8130476	0	NA means under detection limit
339.144	C17 H23 O7	17	23	0	7	0	NA	NA	339.144	NA	NA	0	0	4677309	0	0	NA means under detection limit
339.144	C17 H23 O7	17	23	0	7	0	339.144	NA	NA	NA	NA	4805641	0	0	0	0	NA means under detection limit
339.144	C17 H23 O7	17	23	0	7	0	NA	339.144	NA	NA	NA	0	3231500	0	0	0	NA means under detection limit
339.174	C25 H23 O	25	23	0	1	0	NA	NA	NA	NA	339.174	0	0	0	0	3872785	NA means under detection limit
339.174	C25 H23 O	25	23	0	1	0	NA	NA	NA	NA	339.174	0	0	0	0	5972755	NA means under detection limit
339.289	C21 H39 O3	21	39	0	3	0	NA	NA	NA	NA	339.289	0	0	0	0	2801376	NA means under detection limit
339.289	C21 H39 O3	21	39	0	3	0	NA	NA	NA	NA	339.289	0	0	0	0	3460906	NA means under detection limit
339.326	C22 H43 O2	22	43	0	2	0	NA	NA	NA	NA	339.326	0	0	0	0	3286760	NA means under detection limit
339.326	C22 H43 O2	22	43	0	2	0	NA	NA	NA	NA	339.326	0	0	0	0	2776631	NA means under detection limit
339.326	C22 H43 O2	22	43	0	2	0	NA	NA	NA	NA	339.326	0	0	0	0	3841842	NA means under detection limit
340.139	C16 H22 N O7	16	22	1	7	0	NA	NA	340.139	NA	NA	0	0	5429163	0	0	NA means under detection limit
340.139	C16 H22 N O7	16	22	1	7	0	340.139	NA	NA	NA	NA	5088516	0	0	0	0	NA means under detection limit
340.139	C16 H22 N O7	16	22	1	7	0	NA	340.139	NA	NA	NA	0	4092890	0	0	0	NA means under detection limit
340.321	C21 H42 N O2	21	42	1	2	0	NA	NA	NA	340.321	NA	0	0	0	6496492	0	NA means under detection limit
340.357	C22 H46 N O	22	46	1	1	0	NA	NA	NA	NA	340.357	0	0	0	0	9648374	NA means under detection limit
341.05	C14 H13 O10	14	13	0	10	0	NA	NA	NA	341.05	NA	0	0	0	40776120	0	NA means under detection limit
341.05	C14 H13 O10	14	13	0	10	0	341.05	NA	NA	NA	NA	3745261	0	0	0	0	NA means under detection limit
341.066	C18 H13 O7	18	13	0	7	0	NA	NA	341.066	NA	NA	0	0	7905419	0	0	NA means under detection limit
341.066	C18 H13 O7	18	13	0	7	0	341.066	NA	NA	NA	NA	7601649	0	0	0	0	NA means under detection limit
341.066	C18 H13 O7	18	13	0	7	0	NA	341.066	NA	NA	NA	0	6146206	0	0	0	NA means under detection limit
341.087	C15 H17 O9	15	17	0	9	0	NA	NA	NA	341.087	NA	0	0	0	64377280	0	NA means under detection limit
341.087	C15 H17 O9	15	17	0	9	0	NA	NA	341.087	NA	NA	0	0	13926544	0	0	NA means under detection limit
341.087	C15 H17 O9	15	17	0	9	0	341.087	NA	NA	NA	NA	17878518	0	0	0	0	NA means under detection limit
341.087	C15 H17 O9	15	17	0	9	0	NA	341.087	NA	NA	NA	0	12594338	0	0	0	NA means under detection limit
341.102	C19 H17 O6	19	17	0	6	0	NA	NA	341.102	NA	NA	0	0	2483860	0	0	NA means under detection limit
341.102	C19 H17 O6	19	17	0	6	0	NA	341.102	NA	NA	NA	0	2554021	0	0	0	NA means under detection limit
341.123	C16 H21 O8	16	21	0	8	0	NA	NA	NA	341.123	NA	0	0	0	25915850	0	NA means under detection limit
341.123	C16 H21 O8	16	21	0	8	0	NA	NA	341.123	NA	NA	0	0	9726105	0	0	NA means under detection limit
341.123	C16 H21 O8	16	21	0	8	0	341.123	NA	NA	NA	NA	11365888	0	0	0	0	NA means under detection limit
341.123	C16 H21 O8	16	21	0	8	0	NA	341.123	NA	NA	NA	0	8715434	0	0	0	NA means under detection limit
341.138	C20 H21 O5	20	21	0	5	0	NA	NA	341.138	NA	NA	0	0	3021980	0	0	NA means under detection limit
341.138	C20 H21 O5	20	21	0	5	0	341.138	NA	NA	NA	NA	3518980	0	0	0	0	NA means under detection limit
341.138	C20 H21 O5	20	21	0	5	0	NA	341.138	NA	NA	NA	0	2797741	0	0	0	NA means under detection limit
341.159	C17 H25 O7	17	25	0	7	0	NA	NA	NA	341.16	NA	0	0	0	4530645	0	NA means under detection limit
341.175	C21 H25 O4	21	25	0	4	0	341.175	NA	NA	NA	NA	2456589	0	0	0	0	NA means under detection limit
341.269	C20 H37 O4	20	37	0	4	0	NA	NA	NA	NA	341.269	0	0	0	0	2567881	NA means under detection limit
341.305	C21 H41 O3	21	41	0	3	0	NA	NA	NA	NA	341.305	0	0	0	0	3892421	NA means under detection limit
341.305	C21 H41 O3	21	41	0	3	0	NA	NA	NA	NA	341.305	0	0	0	0	2613807	NA means under detection limit
341.305	C21 H41 O3	21	41	0	3	0	NA	NA	NA	NA	341.305	0	0	0	0	3287249	NA means under detection limit
341.305	C21 H41 O3	21	41	0	3	0	NA	NA	NA	NA	341.305	0	0	0	0	4962814	NA means under detection limit
342.337	C21 H44 N O2	21	44	1	2	0	NA	NA	NA	342.337	NA	0	0	0	5474083	0	NA means under detection limit
343.03	C13 H11 O11	13	11	0	11	0	NA	NA	NA	343.03	NA	0	0	0	3919851	0	NA means under detection limit
343.066	C14 H15 O10	14	15	0	10	0	NA	NA	NA	343.066	NA	0	0	0	21664756	0	NA means under detection limit
343.066	C14 H15 O10	14	15	0	10	0	343.066	NA	NA	NA	NA	2829311	0	0	0	0	NA means under detection limit
343.102	C15 H19 O9	15	19	0	9	0	NA	NA	NA	343.102	NA	0	0	0	61305856	0	NA means under detection limit
343.102	C15 H19 O9	15	19	0	9	0	NA	NA	343.102	NA	NA	0	0	6118019	0	0	NA means under detection limit
343.102	C15 H19 O9	15	19	0	9	0	343.102	NA	NA	NA	NA	9480201	0	0	0	0	NA means under detection limit
343.102	C15 H19 O9	15	19	0	9	0	NA	343.102	NA	NA	NA	0	6208088	0	0	0	NA means under detection limit
343.118	C19 H19 O6	19	19	0	6	0	NA	NA	343.118	NA	NA	0	0	6274695	0	0	NA means under detection limit
343.118	C19 H19 O6	19	19	0	6	0	343.118	NA	NA	NA	NA	6649869	0	0	0	0	NA means under detection limit
343.118	C19 H19 O6	19	19	0	6	0	NA	343.118	NA	NA	NA	0	6398555	0	0	0	NA means under detection limit
343.139	C16 H23 O8	16	23	0	8	0	NA	NA	NA	343.139	NA	0	0	0	7665674	0	NA means under detection limit
343.139	C16 H23 O8	16	23	0	8	0	NA	NA	343.139	NA	NA	0	0	2469004	0	0	NA means under detection limit
343.154	C20 H23 O5	20	23	0	5	0	NA	NA	343.154	NA	NA	0	0	4345488	0	0	NA means under detection limit
343.154	C20 H23 O5	20	23	0	5	0	343.154	NA	NA	NA	NA	4156439	0	0	0	0	NA means under detection limit
343.154	C20 H23 O5	20	23	0	5	0	NA	343.154	NA	NA	NA	0	3760739	0	0	0	NA means under detection limit
343.284	C20 H39 O4	20	39	0	4	0	NA	343.284	NA	NA	NA	0	2785920	0	0	0	NA means under detection limit
345.045	C13 H13 O11	13	13	0	11	0	NA	NA	NA	345.045	NA	0	0	0	6565439	0	NA means under detection limit
345.049	C10 H17 O11 S	10	17	0	11	1	NA	NA	NA	NA	345.049	0	0	0	0	2532877	NA means under detection limit
345.064	C14 H17 O8 S	14	17	0	8	1	NA	NA	NA	345.064	NA	0	0	0	2909764	0	NA means under detection limit
345.082	C14 H17 O10	14	17	0	10	0	NA	NA	NA	345.082	NA	0	0	0	9977417	0	NA means under detection limit
345.097	C18 H17 O7	18	17	0	7	0	NA	NA	345.097	NA	NA	0	0	7169152	0	0	NA means under detection limit
345.097	C18 H17 O7	18	17	0	7	0	345.097	NA	NA	NA	NA	8692263	0	0	0	0	NA means under detection limit
345.097	C18 H17 O7	18	17	0	7	0	NA	345.097	NA	NA	NA	0	7491608	0	0	0	NA means under detection limit
345.118	C15 H21 O9	15	21	0	9	0	NA	NA	NA	345.118	NA	0	0	0	21128788	0	NA means under detection limit
345.133	C19 H21 O6	19	21	0	6	0	NA	NA	345.133	NA	NA	0	0	5779594	0	0	NA means under detection limit
345.133	C19 H21 O6	19	21	0	6	0	345.133	NA	NA	NA	NA	5689905	0	0	0	0	NA means under detection limit
345.133	C19 H21 O6	19	21	0	6	0	NA	345.133	NA	NA	NA	0	5915680	0	0	0	NA means under detection limit
345.154	C16 H25 O8	16	25	0	8	0	NA	NA	NA	345.154	NA	0	0	0	2477151	0	NA means under detection limit
345.17	C20 H25 O5	20	25	0	5	0	NA	NA	345.17	NA	NA	0	0	3873939	0	0	NA means under detection limit
345.17	C20 H25 O5	20	25	0	5	0	345.17	NA	NA	NA	NA	3736635	0	0	0	0	NA means under detection limit
345.17	C20 H25 O5	20	25	0	5	0	NA	345.17	NA	NA	NA	0	3589672	0	0	0	NA means under detection limit
345.206	C21 H29 O4	21	29	0	4	0	NA	NA	NA	345.206	NA	0	0	0	3580527	0	NA means under detection limit
346.129	C18 H20 N O6	18	20	1	6	0	346.128	NA	NA	NA	NA	2506566	0	0	0	0	NA means under detection limit
346.165	C19 H24 N O5	19	24	1	5	0	NA	NA	346.165	NA	NA	0	0	3274646	0	0	NA means under detection limit
347.043	C13 H15 O9 S	13	15	0	9	1	NA	NA	NA	347.043	NA	0	0	0	9570465	0	NA means under detection limit
347.076	C17 H15 O8	17	15	0	8	0	NA	NA	NA	347.076	NA	0	0	0	6624428	0	NA means under detection limit
347.076	C17 H15 O8	17	15	0	8	0	NA	NA	347.076	NA	NA	0	0	3487878	0	0	NA means under detection limit
347.076	C17 H15 O8	17	15	0	8	0	347.076	NA	NA	NA	NA	5434449	0	0	0	0	NA means under detection limit
347.076	C17 H15 O8	17	15	0	8	0	NA	347.076	NA	NA	NA	0	4005347	0	0	0	NA means under detection limit
347.08	C14 H19 O8 S	14	19	0	8	1	NA	NA	NA	347.079	NA	0	0	0	2615725	0	NA means under detection limit
347.08	C14 H19 O8 S	14	19	0	8	1	NA	NA	347.08	NA	NA	0	0	2484359	0	0	NA means under detection limit
347.097	C14 H19 O10	14	19	0	10	0	NA	NA	NA	347.097	NA	0	0	0	8605874	0	NA means under detection limit
347.113	C18 H19 O7	18	19	0	7	0	NA	NA	NA	347.113	NA	0	0	0	4994231	0	NA means under detection limit
347.113	C18 H19 O7	18	19	0	7	0	NA	NA	347.113	NA	NA	0	0	6554256	0	0	NA means under detection limit
347.113	C18 H19 O7	18	19	0	7	0	347.113	NA	NA	NA	NA	7441499	0	0	0	0	NA means under detection limit
347.113	C18 H19 O7	18	19	0	7	0	NA	347.113	NA	NA	NA	0	5322220	0	0	0	NA means under detection limit
347.149	C19 H23 O6	19	23	0	6	0	NA	NA	347.149	NA	NA	0	0	6129306	0	0	NA means under detection limit
347.149	C19 H23 O6	19	23	0	6	0	347.149	NA	NA	NA	NA	6036581	0	0	0	0	NA means under detection limit
347.149	C19 H23 O6	19	23	0	6	0	NA	347.149	NA	NA	NA	0	6253044	0	0	0	NA means under detection limit
347.185	C20 H27 O5	20	27	0	5	0	NA	NA	NA	347.185	NA	0	0	0	4000974	0	NA means under detection limit
347.185	C20 H27 O5	20	27	0	5	0	NA	NA	347.185	NA	NA	0	0	3219107	0	0	NA means under detection limit
347.222	C21 H31 O4	21	31	0	4	0	NA	NA	NA	347.222	NA	0	0	0	5364953	0	NA means under detection limit
348.108	C17 H18 N O7	17	18	1	7	0	348.108	NA	NA	NA	NA	2754935	0	0	0	0	NA means under detection limit
348.144	C18 H22 N O6	18	22	1	6	0	NA	NA	348.144	NA	NA	0	0	2955171	0	0	NA means under detection limit
348.144	C18 H22 N O6	18	22	1	6	0	348.144	NA	NA	NA	NA	3029377	0	0	0	0	NA means under detection limit
348.144	C18 H22 N O6	18	22	1	6	0	NA	348.144	NA	NA	NA	0	3548896	0	0	0	NA means under detection limit
348.181	C19 H26 N O5	19	26	1	5	0	NA	348.181	NA	NA	NA	0	2469097	0	0	0	NA means under detection limit
348.326	C23 H42 N O	23	42	1	1	0	NA	NA	NA	348.326	NA	0	0	0	2617396	0	NA means under detection limit
349.055	C16 H13 O9	16	13	0	9	0	NA	NA	NA	349.055	NA	0	0	0	5976860	0	NA means under detection limit
349.055	C16 H13 O9	16	13	0	9	0	NA	NA	349.055	NA	NA	0	0	2919577	0	0	NA means under detection limit
349.055	C16 H13 O9	16	13	0	9	0	349.055	NA	NA	NA	NA	4479625	0	0	0	0	NA means under detection limit
349.055	C16 H13 O9	16	13	0	9	0	NA	349.055	NA	NA	NA	0	2865083	0	0	0	NA means under detection limit
349.059	C13 H17 O9 S	13	17	0	9	1	NA	NA	NA	349.059	NA	0	0	0	13425437	0	NA means under detection limit
349.092	C17 H17 O8	17	17	0	8	0	NA	NA	NA	349.092	NA	0	0	0	14684968	0	NA means under detection limit
349.092	C17 H17 O8	17	17	0	8	0	NA	NA	349.092	NA	NA	0	0	9601186	0	0	NA means under detection limit
349.092	C17 H17 O8	17	17	0	8	0	349.092	NA	NA	NA	NA	11456147	0	0	0	0	NA means under detection limit
349.092	C17 H17 O8	17	17	0	8	0	NA	349.092	NA	NA	NA	0	9845700	0	0	0	NA means under detection limit
349.128	C18 H21 O7	18	21	0	7	0	NA	NA	NA	349.128	NA	0	0	0	13394739	0	NA means under detection limit
349.128	C18 H21 O7	18	21	0	7	0	NA	NA	349.128	NA	NA	0	0	11116716	0	0	NA means under detection limit
349.128	C18 H21 O7	18	21	0	7	0	349.128	NA	NA	NA	NA	11968158	0	0	0	0	NA means under detection limit
349.128	C18 H21 O7	18	21	0	7	0	NA	349.128	NA	NA	NA	0	10703821	0	0	0	NA means under detection limit
349.165	C19 H25 O6	19	25	0	6	0	NA	NA	349.165	NA	NA	0	0	4275382	0	0	NA means under detection limit
349.165	C19 H25 O6	19	25	0	6	0	349.165	NA	NA	NA	NA	4705961	0	0	0	0	NA means under detection limit
349.165	C19 H25 O6	19	25	0	6	0	NA	349.165	NA	NA	NA	0	4572118	0	0	0	NA means under detection limit
349.201	C20 H29 O5	20	29	0	5	0	NA	NA	NA	349.201	NA	0	0	0	3862347	0	NA means under detection limit
350.123	C17 H20 N O7	17	20	1	7	0	NA	NA	350.123	NA	NA	0	0	3392956	0	0	NA means under detection limit
350.123	C17 H20 N O7	17	20	1	7	0	350.123	NA	NA	NA	NA	4480961	0	0	0	0	NA means under detection limit
350.123	C17 H20 N O7	17	20	1	7	0	NA	350.123	NA	NA	NA	0	3684544	0	0	0	NA means under detection limit
350.127	C14 H24 N O7 S	14	24	1	7	1	NA	NA	NA	350.127	NA	0	0	0	2982517	0	NA means under detection limit
350.16	C18 H24 N O6	18	24	1	6	0	NA	NA	350.16	NA	NA	0	0	2909126	0	0	NA means under detection limit
350.16	C18 H24 N O6	18	24	1	6	0	350.16	NA	NA	NA	NA	2625484	0	0	0	0	NA means under detection limit
350.342	C23 H44 N O	23	44	1	1	0	NA	NA	NA	350.342	NA	0	0	0	4081851	0	NA means under detection limit
351.035	C15 H11 O10	15	11	0	10	0	NA	NA	NA	351.035	NA	0	0	0	2590622	0	NA means under detection limit
351.071	C16 H15 O9	16	15	0	9	0	NA	NA	NA	351.071	NA	0	0	0	34069928	0	NA means under detection limit
351.071	C16 H15 O9	16	15	0	9	0	NA	NA	351.071	NA	NA	0	0	7254721	0	0	NA means under detection limit
351.071	C16 H15 O9	16	15	0	9	0	351.071	NA	NA	NA	NA	10193113	0	0	0	0	NA means under detection limit
351.071	C16 H15 O9	16	15	0	9	0	NA	351.071	NA	NA	NA	0	6946218	0	0	0	NA means under detection limit
351.107	C17 H19 O8	17	19	0	8	0	NA	NA	NA	351.107	NA	0	0	0	22879670	0	NA means under detection limit
351.107	C17 H19 O8	17	19	0	8	0	NA	NA	351.107	NA	NA	0	0	10910411	0	0	NA means under detection limit
351.107	C17 H19 O8	17	19	0	8	0	351.107	NA	NA	NA	NA	13482212	0	0	0	0	NA means under detection limit
351.107	C17 H19 O8	17	19	0	8	0	NA	351.107	NA	NA	NA	0	10995123	0	0	0	NA means under detection limit
351.144	C18 H23 O7	18	23	0	7	0	NA	NA	NA	351.144	NA	0	0	0	4313538	0	NA means under detection limit
351.144	C18 H23 O7	18	23	0	7	0	NA	NA	351.144	NA	NA	0	0	6319829	0	0	NA means under detection limit
351.144	C18 H23 O7	18	23	0	7	0	351.144	NA	NA	NA	NA	5873903	0	0	0	0	NA means under detection limit
351.144	C18 H23 O7	18	23	0	7	0	NA	351.144	NA	NA	NA	0	6131132	0	0	0	NA means under detection limit
351.289	C22 H39 O3	22	39	0	3	0	NA	NA	NA	NA	351.289	0	0	0	0	2751258	NA means under detection limit
351.289	C22 H39 O3	22	39	0	3	0	NA	NA	NA	NA	351.289	0	0	0	0	2895328	NA means under detection limit
352.106	C13 H22 N O8 S	13	22	1	8	1	NA	NA	NA	352.106	NA	0	0	0	4480768	0	NA means under detection limit
352.139	C17 H22 N O7	17	22	1	7	0	NA	NA	352.139	NA	NA	0	0	4794346	0	0	NA means under detection limit
352.139	C17 H22 N O7	17	22	1	7	0	352.139	NA	NA	NA	NA	5703192	0	0	0	0	NA means under detection limit
352.139	C17 H22 N O7	17	22	1	7	0	NA	352.139	NA	NA	NA	0	4244149	0	0	0	NA means under detection limit
352.233	C16 H34 N O7	16	34	1	7	0	NA	NA	NA	352.233	NA	0	0	0	3216682	0	NA means under detection limit
352.321	C22 H42 N O2	22	42	1	2	0	NA	NA	NA	352.321	NA	0	0	0	5294920	0	NA means under detection limit
352.357	C23 H46 N O	23	46	1	1	0	NA	NA	NA	352.357	NA	0	0	0	7642964	0	NA means under detection limit
353.05	C15 H13 O10	15	13	0	10	0	NA	NA	NA	353.05	NA	0	0	0	21540924	0	NA means under detection limit
353.05	C15 H13 O10	15	13	0	10	0	NA	NA	353.05	NA	NA	0	0	4137193	0	0	NA means under detection limit
353.05	C15 H13 O10	15	13	0	10	0	353.05	NA	NA	NA	NA	5236523	0	0	0	0	NA means under detection limit
353.05	C15 H13 O10	15	13	0	10	0	NA	353.05	NA	NA	NA	0	3046299	0	0	0	NA means under detection limit
353.087	C16 H17 O9	16	17	0	9	0	NA	NA	NA	353.087	NA	0	0	0	86097992	0	NA means under detection limit
353.087	C16 H17 O9	16	17	0	9	0	NA	NA	353.087	NA	NA	0	0	39226612	0	0	NA means under detection limit
353.087	C16 H17 O9	16	17	0	9	0	353.087	NA	NA	NA	NA	49204020	0	0	0	0	NA means under detection limit
353.087	C16 H17 O9	16	17	0	9	0	NA	353.087	NA	NA	NA	0	39249828	0	0	0	NA means under detection limit
353.123	C17 H21 O8	17	21	0	8	0	NA	NA	NA	353.123	NA	0	0	0	105693272	0	NA means under detection limit
353.123	C17 H21 O8	17	21	0	8	0	NA	NA	353.123	NA	NA	0	0	19881214	0	0	NA means under detection limit
353.123	C17 H21 O8	17	21	0	8	0	353.123	NA	NA	NA	NA	26561344	0	0	0	0	NA means under detection limit
353.123	C17 H21 O8	17	21	0	8	0	NA	353.123	NA	NA	NA	0	19208110	0	0	0	NA means under detection limit
353.159	C18 H25 O7	18	25	0	7	0	NA	NA	NA	353.16	NA	0	0	0	4791393	0	NA means under detection limit
353.159	C18 H25 O7	18	25	0	7	0	NA	NA	353.159	NA	NA	0	0	3785992	0	0	NA means under detection limit
353.159	C18 H25 O7	18	25	0	7	0	353.159	NA	NA	NA	NA	3026764	0	0	0	0	NA means under detection limit
353.159	C18 H25 O7	18	25	0	7	0	NA	353.159	NA	NA	NA	0	2992567	0	0	0	NA means under detection limit
353.269	C21 H37 O4	21	37	0	4	0	NA	353.269	NA	NA	NA	0	2548691	0	0	0	NA means under detection limit
353.341	C23 H45 O2	23	45	0	2	0	NA	NA	NA	NA	353.341	0	0	0	0	3474235	NA means under detection limit
353.341	C23 H45 O2	23	45	0	2	0	NA	NA	NA	NA	353.341	0	0	0	0	3463555	NA means under detection limit
353.341	C23 H45 O2	23	45	0	2	0	NA	NA	NA	NA	353.341	0	0	0	0	2988005	NA means under detection limit
354.122	C13 H24 N O8 S	13	24	1	8	1	NA	NA	NA	354.122	NA	0	0	0	18244006	0	NA means under detection limit
354.155	C17 H24 N O7	17	24	1	7	0	NA	NA	354.155	NA	NA	0	0	3358754	0	0	NA means under detection limit
354.155	C17 H24 N O7	17	24	1	7	0	354.155	NA	NA	NA	NA	3373179	0	0	0	0	NA means under detection limit
354.155	C17 H24 N O7	17	24	1	7	0	NA	354.155	NA	NA	NA	0	2714806	0	0	0	NA means under detection limit
354.212	C15 H32 N O8	15	32	1	8	0	NA	NA	NA	354.212	NA	0	0	0	2511301	0	NA means under detection limit
354.3	C21 H40 N O3	21	40	1	3	0	NA	NA	NA	354.3	NA	0	0	0	3664355	0	NA means under detection limit
354.337	C22 H44 N O2	22	44	1	2	0	NA	NA	NA	NA	354.337	0	0	0	0	3621462	NA means under detection limit
354.337	C22 H44 N O2	22	44	1	2	0	NA	NA	NA	NA	354.337	0	0	0	0	3113139	NA means under detection limit
354.337	C22 H44 N O2	22	44	1	2	0	NA	NA	NA	NA	354.337	0	0	0	0	4252901	NA means under detection limit
354.337	C22 H44 N O2	22	44	1	2	0	NA	NA	NA	NA	354.337	0	0	0	0	18330096	NA means under detection limit
355.066	C15 H15 O10	15	15	0	10	0	NA	NA	NA	355.066	NA	0	0	0	54231784	0	NA means under detection limit
355.066	C15 H15 O10	15	15	0	10	0	NA	NA	355.066	NA	NA	0	0	8060710	0	0	NA means under detection limit
355.066	C15 H15 O10	15	15	0	10	0	355.066	NA	NA	NA	NA	12174739	0	0	0	0	NA means under detection limit
355.066	C15 H15 O10	15	15	0	10	0	NA	355.066	NA	NA	NA	0	7848353	0	0	0	NA means under detection limit
355.081	C19 H15 O7	19	15	0	7	0	NA	NA	355.081	NA	NA	0	0	5097258	0	0	NA means under detection limit
355.081	C19 H15 O7	19	15	0	7	0	355.081	NA	NA	NA	NA	4637080	0	0	0	0	NA means under detection limit
355.081	C19 H15 O7	19	15	0	7	0	NA	355.081	NA	NA	NA	0	4455845	0	0	0	NA means under detection limit
355.102	C16 H19 O9	16	19	0	9	0	NA	NA	NA	355.102	NA	0	0	0	61653748	0	NA means under detection limit
355.102	C16 H19 O9	16	19	0	9	0	NA	NA	355.102	NA	NA	0	0	13025072	0	0	NA means under detection limit
355.102	C16 H19 O9	16	19	0	9	0	355.102	NA	NA	NA	NA	13415838	0	0	0	0	NA means under detection limit
355.102	C16 H19 O9	16	19	0	9	0	NA	355.102	NA	NA	NA	0	11391403	0	0	0	NA means under detection limit
355.139	C17 H23 O8	17	23	0	8	0	NA	NA	NA	355.139	NA	0	0	0	16143106	0	NA means under detection limit
355.139	C17 H23 O8	17	23	0	8	0	NA	NA	355.139	NA	NA	0	0	5555003	0	0	NA means under detection limit
355.139	C17 H23 O8	17	23	0	8	0	355.139	NA	NA	NA	NA	5065129	0	0	0	0	NA means under detection limit
355.139	C17 H23 O8	17	23	0	8	0	NA	355.139	NA	NA	NA	0	3720116	0	0	0	NA means under detection limit
355.154	C21 H23 O5	21	23	0	5	0	NA	NA	355.154	NA	NA	0	0	3154751	0	0	NA means under detection limit
355.154	C21 H23 O5	21	23	0	5	0	355.154	NA	NA	NA	NA	3182510	0	0	0	0	NA means under detection limit
355.154	C21 H23 O5	21	23	0	5	0	NA	355.154	NA	NA	NA	0	2980280	0	0	0	NA means under detection limit
355.284	C21 H39 O4	21	39	0	4	0	NA	NA	NA	NA	355.284	0	0	0	0	10440548	NA means under detection limit
355.284	C21 H39 O4	21	39	0	4	0	NA	NA	NA	NA	355.284	0	0	0	0	9911766	NA means under detection limit
355.284	C21 H39 O4	21	39	0	4	0	NA	NA	NA	NA	355.284	0	0	0	0	11823578	NA means under detection limit
355.284	C21 H39 O4	21	39	0	4	0	NA	NA	NA	NA	355.284	0	0	0	0	8252213	NA means under detection limit
356.316	C21 H42 N O3	21	42	1	3	0	NA	NA	NA	356.316	NA	0	0	0	4732058	0	NA means under detection limit
356.352	C22 H46 N O2	22	46	1	2	0	NA	NA	NA	356.352	NA	0	0	0	10591398	0	NA means under detection limit
357.045	C14 H13 O11	14	13	0	11	0	NA	NA	NA	357.045	NA	0	0	0	6808985	0	NA means under detection limit
357.064	C15 H17 O8 S	15	17	0	8	1	NA	NA	NA	357.064	NA	0	0	0	3684255	0	NA means under detection limit
357.082	C15 H17 O10	15	17	0	10	0	NA	NA	NA	357.082	NA	0	0	0	145048992	0	NA means under detection limit
357.082	C15 H17 O10	15	17	0	10	0	NA	NA	357.082	NA	NA	0	0	5271916	0	0	NA means under detection limit
357.082	C15 H17 O10	15	17	0	10	0	357.082	NA	NA	NA	NA	7323652	0	0	0	0	NA means under detection limit
357.082	C15 H17 O10	15	17	0	10	0	NA	357.082	NA	NA	NA	0	4943794	0	0	0	NA means under detection limit
357.118	C16 H21 O9	16	21	0	9	0	NA	NA	NA	357.118	NA	0	0	0	50070964	0	NA means under detection limit
357.118	C16 H21 O9	16	21	0	9	0	NA	NA	357.118	NA	NA	0	0	9961846	0	0	NA means under detection limit
357.118	C16 H21 O9	16	21	0	9	0	357.118	NA	NA	NA	NA	12992528	0	0	0	0	NA means under detection limit
357.118	C16 H21 O9	16	21	0	9	0	NA	357.118	NA	NA	NA	0	9296828	0	0	0	NA means under detection limit
357.133	C20 H21 O6	20	21	0	6	0	NA	NA	357.133	NA	NA	0	0	5612923	0	0	NA means under detection limit
357.133	C20 H21 O6	20	21	0	6	0	357.133	NA	NA	NA	NA	4661269	0	0	0	0	NA means under detection limit
357.133	C20 H21 O6	20	21	0	6	0	NA	357.133	NA	NA	NA	0	4395968	0	0	0	NA means under detection limit
357.154	C17 H25 O8	17	25	0	8	0	NA	NA	NA	357.154	NA	0	0	0	4208063	0	NA means under detection limit
357.17	C21 H25 O5	21	25	0	5	0	NA	NA	357.17	NA	NA	0	0	3115397	0	0	NA means under detection limit
357.17	C21 H25 O5	21	25	0	5	0	357.17	NA	NA	NA	NA	3455008	0	0	0	0	NA means under detection limit
357.282	C21 H41 O2 S	21	41	0	2	1	NA	NA	NA	NA	357.282	0	0	0	0	4749734	NA means under detection limit
357.282	C21 H41 O2 S	21	41	0	2	1	NA	NA	NA	NA	357.282	0	0	0	0	4892739	NA means under detection limit
357.282	C21 H41 O2 S	21	41	0	2	1	NA	NA	NA	NA	357.282	0	0	0	0	4914151	NA means under detection limit
357.282	C21 H41 O2 S	21	41	0	2	1	NA	NA	NA	NA	357.282	0	0	0	0	5512684	NA means under detection limit
357.3	C21 H41 O4	21	41	0	4	0	NA	NA	357.3	NA	NA	0	0	2986411	0	0	NA means under detection limit
358.129	C19 H20 N O6	19	20	1	6	0	358.129	NA	NA	NA	NA	2608461	0	0	0	0	NA means under detection limit
358.332	C21 H44 N O3	21	44	1	3	0	NA	NA	NA	358.332	NA	0	0	0	4739934	0	NA means under detection limit
358.368	C22 H48 N O2	22	48	1	2	0	NA	NA	NA	NA	358.368	0	0	0	0	13461355	NA means under detection limit
359.061	C14 H15 O11	14	15	0	11	0	NA	NA	NA	359.061	NA	0	0	0	28620898	0	NA means under detection limit
359.064	C11 H19 O11 S	11	19	0	11	1	NA	NA	NA	359.064	NA	0	0	0	2740834	0	NA means under detection limit
359.076	C18 H15 O8	18	15	0	8	0	NA	NA	359.076	NA	NA	0	0	3339187	0	0	NA means under detection limit
359.076	C18 H15 O8	18	15	0	8	0	359.076	NA	NA	NA	NA	4542072	0	0	0	0	NA means under detection limit
359.076	C18 H15 O8	18	15	0	8	0	NA	359.076	NA	NA	NA	0	3074503	0	0	0	NA means under detection limit
359.097	C15 H19 O10	15	19	0	10	0	NA	NA	NA	359.097	NA	0	0	0	22169710	0	NA means under detection limit
359.097	C15 H19 O10	15	19	0	10	0	359.097	NA	NA	NA	NA	2770559	0	0	0	0	NA means under detection limit
359.113	C19 H19 O7	19	19	0	7	0	NA	NA	NA	359.112	NA	0	0	0	3964020	0	NA means under detection limit
359.113	C19 H19 O7	19	19	0	7	0	NA	NA	359.113	NA	NA	0	0	6249406	0	0	NA means under detection limit
359.113	C19 H19 O7	19	19	0	7	0	359.113	NA	NA	NA	NA	6179460	0	0	0	0	NA means under detection limit
359.113	C19 H19 O7	19	19	0	7	0	NA	359.113	NA	NA	NA	0	5196241	0	0	0	NA means under detection limit
359.134	C16 H23 O9	16	23	0	9	0	NA	NA	NA	359.134	NA	0	0	0	68339832	0	NA means under detection limit
359.134	C16 H23 O9	16	23	0	9	0	NA	NA	359.134	NA	NA	0	0	4169668	0	0	NA means under detection limit
359.134	C16 H23 O9	16	23	0	9	0	359.134	NA	NA	NA	NA	10498698	0	0	0	0	NA means under detection limit
359.134	C16 H23 O9	16	23	0	9	0	NA	359.134	NA	NA	NA	0	5912023	0	0	0	NA means under detection limit
359.149	C20 H23 O6	20	23	0	6	0	NA	NA	359.149	NA	NA	0	0	5749704	0	0	NA means under detection limit
359.149	C20 H23 O6	20	23	0	6	0	359.149	NA	NA	NA	NA	6221455	0	0	0	0	NA means under detection limit
359.149	C20 H23 O6	20	23	0	6	0	NA	359.149	NA	NA	NA	0	5846491	0	0	0	NA means under detection limit
359.17	C17 H27 O8	17	27	0	8	0	NA	NA	NA	359.17	NA	0	0	0	7954568	0	NA means under detection limit
359.17	C17 H27 O8	17	27	0	8	0	NA	NA	359.17	NA	NA	0	0	3784655	0	0	NA means under detection limit
359.17	C17 H27 O8	17	27	0	8	0	359.17	NA	NA	NA	NA	4418198	0	0	0	0	NA means under detection limit
359.17	C17 H27 O8	17	27	0	8	0	NA	359.17	NA	NA	NA	0	3615712	0	0	0	NA means under detection limit
359.185	C21 H27 O5	21	27	0	5	0	NA	NA	359.185	NA	NA	0	0	2831827	0	0	NA means under detection limit
359.185	C21 H27 O5	21	27	0	5	0	359.185	NA	NA	NA	NA	3508890	0	0	0	0	NA means under detection limit
359.185	C21 H27 O5	21	27	0	5	0	NA	359.185	NA	NA	NA	0	2789348	0	0	0	NA means under detection limit
360.108	C18 H18 N O7	18	18	1	7	0	360.108	NA	NA	NA	NA	2701759	0	0	0	0	NA means under detection limit
360.144	C19 H22 N O6	19	22	1	6	0	NA	NA	360.144	NA	NA	0	0	2658542	0	0	NA means under detection limit
360.144	C19 H22 N O6	19	22	1	6	0	360.144	NA	NA	NA	NA	2499019	0	0	0	0	NA means under detection limit
361.055	C17 H13 O9	17	13	0	9	0	NA	NA	NA	361.055	NA	0	0	0	2981166	0	NA means under detection limit
361.059	C14 H17 O9 S	14	17	0	9	1	NA	NA	NA	361.059	NA	0	0	0	6978351	0	NA means under detection limit
361.08	C11 H21 O11 S	11	21	0	11	1	NA	NA	NA	NA	361.08	0	0	0	0	4377092	NA means under detection limit
361.08	C11 H21 O11 S	11	21	0	11	1	NA	NA	NA	NA	361.08	0	0	0	0	4521206	NA means under detection limit
361.08	C11 H21 O11 S	11	21	0	11	1	NA	NA	NA	NA	361.08	0	0	0	0	5001191	NA means under detection limit
361.08	C11 H21 O11 S	11	21	0	11	1	NA	NA	NA	NA	361.08	0	0	0	0	147868464	NA means under detection limit
361.092	C18 H17 O8	18	17	0	8	0	NA	NA	NA	361.092	NA	0	0	0	5793595	0	NA means under detection limit
361.092	C18 H17 O8	18	17	0	8	0	NA	NA	361.092	NA	NA	0	0	5788168	0	0	NA means under detection limit
361.092	C18 H17 O8	18	17	0	8	0	361.092	NA	NA	NA	NA	7337210	0	0	0	0	NA means under detection limit
361.092	C18 H17 O8	18	17	0	8	0	NA	361.092	NA	NA	NA	0	5259242	0	0	0	NA means under detection limit
361.113	C15 H21 O10	15	21	0	10	0	NA	NA	NA	361.113	NA	0	0	0	10083139	0	NA means under detection limit
361.128	C19 H21 O7	19	21	0	7	0	NA	NA	NA	361.128	NA	0	0	0	4986697	0	NA means under detection limit
361.128	C19 H21 O7	19	21	0	7	0	NA	NA	361.128	NA	NA	0	0	8680978	0	0	NA means under detection limit
361.128	C19 H21 O7	19	21	0	7	0	361.128	NA	NA	NA	NA	7949573	0	0	0	0	NA means under detection limit
361.128	C19 H21 O7	19	21	0	7	0	NA	361.128	NA	NA	NA	0	6491124	0	0	0	NA means under detection limit
361.165	C20 H25 O6	20	25	0	6	0	NA	NA	361.165	NA	NA	0	0	6534685	0	0	NA means under detection limit
361.165	C20 H25 O6	20	25	0	6	0	361.165	NA	NA	NA	NA	5141777	0	0	0	0	NA means under detection limit
361.165	C20 H25 O6	20	25	0	6	0	NA	361.165	NA	NA	NA	0	4734974	0	0	0	NA means under detection limit
361.201	C21 H29 O5	21	29	0	5	0	NA	NA	NA	361.201	NA	0	0	0	3604323	0	NA means under detection limit
361.201	C21 H29 O5	21	29	0	5	0	NA	NA	361.201	NA	NA	0	0	2918952	0	0	NA means under detection limit
362.123	C18 H20 N O7	18	20	1	7	0	NA	NA	362.123	NA	NA	0	0	3734331	0	0	NA means under detection limit
362.123	C18 H20 N O7	18	20	1	7	0	362.123	NA	NA	NA	NA	3510852	0	0	0	0	NA means under detection limit
362.127	C15 H24 N O7 S	15	24	1	7	1	NA	NA	NA	362.127	NA	0	0	0	2681011	0	NA means under detection limit
362.16	C19 H24 N O6	19	24	1	6	0	362.16	NA	NA	NA	NA	2908240	0	0	0	0	NA means under detection limit
362.16	C19 H24 N O6	19	24	1	6	0	NA	362.16	NA	NA	NA	0	2607888	0	0	0	NA means under detection limit
363.059	C10 H19 O12 S	10	19	0	12	1	NA	NA	NA	NA	363.059	0	0	0	0	2582897	NA means under detection limit
363.071	C17 H15 O9	17	15	0	9	0	NA	NA	363.071	NA	NA	0	0	6107224	0	0	NA means under detection limit
363.071	C17 H15 O9	17	15	0	9	0	363.071	NA	NA	NA	NA	7358325	0	0	0	0	NA means under detection limit
363.071	C17 H15 O9	17	15	0	9	0	NA	363.071	NA	NA	NA	0	5960204	0	0	0	NA means under detection limit
363.074	C14 H19 O9 S	14	19	0	9	1	NA	NA	NA	363.074	NA	0	0	0	477416960	0	NA means under detection limit
363.107	C18 H19 O8	18	19	0	8	0	NA	NA	NA	363.107	NA	0	0	0	14507546	0	NA means under detection limit
363.107	C18 H19 O8	18	19	0	8	0	NA	NA	363.107	NA	NA	0	0	10897506	0	0	NA means under detection limit
363.107	C18 H19 O8	18	19	0	8	0	363.107	NA	NA	NA	NA	11257729	0	0	0	0	NA means under detection limit
363.107	C18 H19 O8	18	19	0	8	0	NA	363.107	NA	NA	NA	0	8831510	0	0	0	NA means under detection limit
363.144	C19 H23 O7	19	23	0	7	0	NA	NA	363.144	NA	NA	0	0	8003693	0	0	NA means under detection limit
363.144	C19 H23 O7	19	23	0	7	0	363.144	NA	NA	NA	NA	8288141	0	0	0	0	NA means under detection limit
363.144	C19 H23 O7	19	23	0	7	0	NA	363.144	NA	NA	NA	0	6914592	0	0	0	NA means under detection limit
363.18	C20 H27 O6	20	27	0	6	0	NA	NA	363.18	NA	NA	0	0	2835064	0	0	NA means under detection limit
363.18	C20 H27 O6	20	27	0	6	0	363.18	NA	NA	NA	NA	3701656	0	0	0	0	NA means under detection limit
363.18	C20 H27 O6	20	27	0	6	0	NA	363.18	NA	NA	NA	0	2775082	0	0	0	NA means under detection limit
364.139	C18 H22 N O7	18	22	1	7	0	NA	NA	364.139	NA	NA	0	0	3298713	0	0	NA means under detection limit
364.139	C18 H22 N O7	18	22	1	7	0	364.139	NA	NA	NA	NA	5523662	0	0	0	0	NA means under detection limit
364.139	C18 H22 N O7	18	22	1	7	0	NA	364.139	NA	NA	NA	0	4212533	0	0	0	NA means under detection limit
365.05	C16 H13 O10	16	13	0	10	0	NA	NA	NA	365.05	NA	0	0	0	15380711	0	NA means under detection limit
365.05	C16 H13 O10	16	13	0	10	0	NA	NA	365.05	NA	NA	0	0	2673836	0	0	NA means under detection limit
365.05	C16 H13 O10	16	13	0	10	0	365.05	NA	NA	NA	NA	6191606	0	0	0	0	NA means under detection limit
365.05	C16 H13 O10	16	13	0	10	0	NA	365.05	NA	NA	NA	0	3252276	0	0	0	NA means under detection limit
365.087	C17 H17 O9	17	17	0	9	0	NA	NA	NA	365.087	NA	0	0	0	62673140	0	NA means under detection limit
365.087	C17 H17 O9	17	17	0	9	0	NA	NA	365.087	NA	NA	0	0	12266167	0	0	NA means under detection limit
365.087	C17 H17 O9	17	17	0	9	0	365.087	NA	NA	NA	NA	14465537	0	0	0	0	NA means under detection limit
365.087	C17 H17 O9	17	17	0	9	0	NA	365.087	NA	NA	NA	0	10279998	0	0	0	NA means under detection limit
365.123	C18 H21 O8	18	21	0	8	0	NA	NA	NA	365.123	NA	0	0	0	17621250	0	NA means under detection limit
365.123	C18 H21 O8	18	21	0	8	0	NA	NA	365.123	NA	NA	0	0	11446978	0	0	NA means under detection limit
365.123	C18 H21 O8	18	21	0	8	0	365.123	NA	NA	NA	NA	12888589	0	0	0	0	NA means under detection limit
365.123	C18 H21 O8	18	21	0	8	0	NA	365.123	NA	NA	NA	0	10583113	0	0	0	NA means under detection limit
365.159	C19 H25 O7	19	25	0	7	0	NA	NA	NA	365.159	NA	0	0	0	3642640	0	NA means under detection limit
365.159	C19 H25 O7	19	25	0	7	0	NA	NA	365.159	NA	NA	0	0	4405965	0	0	NA means under detection limit
365.159	C19 H25 O7	19	25	0	7	0	365.16	NA	NA	NA	NA	4745753	0	0	0	0	NA means under detection limit
365.159	C19 H25 O7	19	25	0	7	0	NA	365.159	NA	NA	NA	0	3729491	0	0	0	NA means under detection limit
366.122	C14 H24 N O8 S	14	24	1	8	1	NA	NA	NA	366.122	NA	0	0	0	5401206	0	NA means under detection limit
366.155	C18 H24 N O7	18	24	1	7	0	NA	NA	366.155	NA	NA	0	0	3248123	0	0	NA means under detection limit
366.155	C18 H24 N O7	18	24	1	7	0	366.155	NA	NA	NA	NA	4236125	0	0	0	0	NA means under detection limit
366.155	C18 H24 N O7	18	24	1	7	0	NA	366.155	NA	NA	NA	0	3981676	0	0	0	NA means under detection limit
366.249	C17 H36 N O7	17	36	1	7	0	NA	NA	NA	366.249	NA	0	0	0	4277926	0	NA means under detection limit
366.337	C23 H44 N O2	23	44	1	2	0	NA	NA	NA	366.337	NA	0	0	0	8757958	0	NA means under detection limit
367.066	C16 H15 O10	16	15	0	10	0	NA	NA	NA	367.066	NA	0	0	0	39687128	0	NA means under detection limit
367.066	C16 H15 O10	16	15	0	10	0	NA	NA	367.066	NA	NA	0	0	7480592	0	0	NA means under detection limit
367.066	C16 H15 O10	16	15	0	10	0	367.066	NA	NA	NA	NA	11904133	0	0	0	0	NA means under detection limit
367.066	C16 H15 O10	16	15	0	10	0	NA	367.066	NA	NA	NA	0	7810670	0	0	0	NA means under detection limit
367.102	C17 H19 O9	17	19	0	9	0	NA	NA	NA	367.102	NA	0	0	0	69620712	0	NA means under detection limit
367.102	C17 H19 O9	17	19	0	9	0	NA	NA	367.102	NA	NA	0	0	23674140	0	0	NA means under detection limit
367.102	C17 H19 O9	17	19	0	9	0	367.102	NA	NA	NA	NA	27614352	0	0	0	0	NA means under detection limit
367.102	C17 H19 O9	17	19	0	9	0	NA	367.102	NA	NA	NA	0	21694072	0	0	0	NA means under detection limit
367.139	C18 H23 O8	18	23	0	8	0	NA	NA	NA	367.139	NA	0	0	0	35836916	0	NA means under detection limit
367.139	C18 H23 O8	18	23	0	8	0	NA	NA	367.139	NA	NA	0	0	11885862	0	0	NA means under detection limit
367.139	C18 H23 O8	18	23	0	8	0	367.139	NA	NA	NA	NA	12346525	0	0	0	0	NA means under detection limit
367.139	C18 H23 O8	18	23	0	8	0	NA	367.139	NA	NA	NA	0	11189890	0	0	0	NA means under detection limit
367.175	C19 H27 O7	19	27	0	7	0	367.175	NA	NA	NA	NA	2775209	0	0	0	0	NA means under detection limit
367.206	C27 H27 O	27	27	0	1	0	NA	NA	NA	NA	367.206	0	0	0	0	4415803	NA means under detection limit
367.206	C27 H27 O	27	27	0	1	0	NA	NA	NA	NA	367.206	0	0	0	0	8543410	NA means under detection limit
367.206	C27 H27 O	27	27	0	1	0	NA	NA	NA	NA	367.206	0	0	0	0	12560021	NA means under detection limit
367.357	C24 H47 O2	24	47	0	2	0	NA	NA	NA	NA	367.357	0	0	0	0	2655593	NA means under detection limit
367.357	C24 H47 O2	24	47	0	2	0	NA	NA	NA	NA	367.357	0	0	0	0	2764992	NA means under detection limit
368.101	C13 H22 N O9 S	13	22	1	9	1	NA	NA	NA	368.101	NA	0	0	0	10716508	0	NA means under detection limit
368.137	C14 H26 N O8 S	14	26	1	8	1	NA	NA	NA	368.137	NA	0	0	0	48059752	0	NA means under detection limit
368.316	C22 H42 N O3	22	42	1	3	0	NA	NA	NA	368.316	NA	0	0	0	4574637	0	NA means under detection limit
368.352	C23 H46 N O2	23	46	1	2	0	NA	NA	NA	368.352	NA	0	0	0	4161979	0	NA means under detection limit
369.045	C15 H13 O11	15	13	0	11	0	NA	NA	NA	369.045	NA	0	0	0	3921600	0	NA means under detection limit
369.082	C16 H17 O10	16	17	0	10	0	NA	NA	NA	369.082	NA	0	0	0	72046288	0	NA means under detection limit
369.082	C16 H17 O10	16	17	0	10	0	NA	NA	369.082	NA	NA	0	0	13033335	0	0	NA means under detection limit
369.082	C16 H17 O10	16	17	0	10	0	369.082	NA	NA	NA	NA	18136854	0	0	0	0	NA means under detection limit
369.082	C16 H17 O10	16	17	0	10	0	NA	369.082	NA	NA	NA	0	12482732	0	0	0	NA means under detection limit
369.118	C17 H21 O9	17	21	0	9	0	NA	NA	NA	369.118	NA	0	0	0	47912668	0	NA means under detection limit
369.118	C17 H21 O9	17	21	0	9	0	NA	NA	369.118	NA	NA	0	0	8869763	0	0	NA means under detection limit
369.118	C17 H21 O9	17	21	0	9	0	369.118	NA	NA	NA	NA	10010403	0	0	0	0	NA means under detection limit
369.118	C17 H21 O9	17	21	0	9	0	NA	369.118	NA	NA	NA	0	9242807	0	0	0	NA means under detection limit
369.154	C18 H25 O8	18	25	0	8	0	NA	NA	NA	369.154	NA	0	0	0	10354409	0	NA means under detection limit
369.154	C18 H25 O8	18	25	0	8	0	NA	NA	369.154	NA	NA	0	0	3127182	0	0	NA means under detection limit
369.154	C18 H25 O8	18	25	0	8	0	369.154	NA	NA	NA	NA	3236655	0	0	0	0	NA means under detection limit
369.17	C22 H25 O5	22	25	0	5	0	NA	NA	369.17	NA	NA	0	0	2706323	0	0	NA means under detection limit
369.17	C22 H25 O5	22	25	0	5	0	369.17	NA	NA	NA	NA	2920244	0	0	0	0	NA means under detection limit
369.17	C22 H25 O5	22	25	0	5	0	NA	369.17	NA	NA	NA	0	2692294	0	0	0	NA means under detection limit
369.264	C21 H37 O5	21	37	0	5	0	NA	369.264	NA	NA	NA	0	2685153	0	0	0	NA means under detection limit
369.3	C22 H41 O4	22	41	0	4	0	NA	NA	NA	NA	369.3	0	0	0	0	3975098	NA means under detection limit
369.3	C22 H41 O4	22	41	0	4	0	NA	NA	NA	NA	369.3	0	0	0	0	3325790	NA means under detection limit
369.3	C22 H41 O4	22	41	0	4	0	NA	NA	NA	NA	369.3	0	0	0	0	3042539	NA means under detection limit
370.244	C16 H36 N O8	16	36	1	8	0	NA	NA	NA	370.243	NA	0	0	0	5138566	0	NA means under detection limit
370.332	C22 H44 N O3	22	44	1	3	0	NA	NA	NA	370.332	NA	0	0	0	6306983	0	NA means under detection limit
370.368	C23 H48 N O2	23	48	1	2	0	NA	NA	NA	370.368	NA	0	0	0	4019381	0	NA means under detection limit
371.061	C15 H15 O11	15	15	0	11	0	NA	NA	NA	371.061	NA	0	0	0	32291260	0	NA means under detection limit
371.097	C16 H19 O10	16	19	0	10	0	NA	NA	NA	NA	371.097	0	0	0	0	428988864	NA means under detection limit
371.113	C20 H19 O7	20	19	0	7	0	NA	NA	371.113	NA	NA	0	0	3132390	0	0	NA means under detection limit
371.113	C20 H19 O7	20	19	0	7	0	371.112	NA	NA	NA	NA	2711982	0	0	0	0	NA means under detection limit
371.134	C17 H23 O9	17	23	0	9	0	NA	NA	NA	371.134	NA	0	0	0	86792664	0	NA means under detection limit
371.134	C17 H23 O9	17	23	0	9	0	NA	NA	371.134	NA	NA	0	0	17474028	0	0	NA means under detection limit
371.134	C17 H23 O9	17	23	0	9	0	371.134	NA	NA	NA	NA	22057398	0	0	0	0	NA means under detection limit
371.134	C17 H23 O9	17	23	0	9	0	NA	371.134	NA	NA	NA	0	17074938	0	0	0	NA means under detection limit
371.149	C21 H23 O6	21	23	0	6	0	NA	NA	371.149	NA	NA	0	0	4077041	0	0	NA means under detection limit
371.149	C21 H23 O6	21	23	0	6	0	371.149	NA	NA	NA	NA	3593658	0	0	0	0	NA means under detection limit
371.149	C21 H23 O6	21	23	0	6	0	NA	371.149	NA	NA	NA	0	3715839	0	0	0	NA means under detection limit
371.17	C18 H27 O8	18	27	0	8	0	NA	NA	NA	371.17	NA	0	0	0	2876390	0	NA means under detection limit
371.316	C22 H43 O4	22	43	0	4	0	NA	NA	NA	NA	371.316	0	0	0	0	4776484	NA means under detection limit
371.316	C22 H43 O4	22	43	0	4	0	NA	NA	NA	NA	371.316	0	0	0	0	4499953	NA means under detection limit
371.316	C22 H43 O4	22	43	0	4	0	NA	NA	NA	NA	371.316	0	0	0	0	5183279	NA means under detection limit
371.316	C22 H43 O4	22	43	0	4	0	NA	NA	NA	NA	371.316	0	0	0	0	2765853	NA means under detection limit
372.144	C20 H22 N O6	20	22	1	6	0	372.144	NA	NA	NA	NA	2594047	0	0	0	0	NA means under detection limit
372.347	C22 H46 N O3	22	46	1	3	0	NA	NA	NA	372.347	NA	0	0	0	16186278	0	NA means under detection limit
372.384	C23 H50 N O2	23	50	1	2	0	NA	NA	NA	372.384	NA	0	0	0	2699700	0	NA means under detection limit
373.077	C15 H17 O11	15	17	0	11	0	373.077	NA	NA	NA	NA	4230192	0	0	0	0	NA means under detection limit
373.077	C15 H17 O11	15	17	0	11	0	NA	NA	NA	373.077	NA	0	0	0	105487552	0	NA means under detection limit
373.08	C12 H21 O11 S	12	21	0	11	1	NA	NA	373.08	NA	NA	0	0	3278914	0	0	NA means under detection limit
373.08	C12 H21 O11 S	12	21	0	11	1	373.08	NA	NA	NA	NA	3280945	0	0	0	0	NA means under detection limit
373.092	C19 H17 O8	19	17	0	8	0	NA	NA	NA	373.092	NA	0	0	0	3148482	0	NA means under detection limit
373.092	C19 H17 O8	19	17	0	8	0	NA	NA	373.092	NA	NA	0	0	3408966	0	0	NA means under detection limit
373.092	C19 H17 O8	19	17	0	8	0	373.092	NA	NA	NA	NA	4356149	0	0	0	0	NA means under detection limit
373.092	C19 H17 O8	19	17	0	8	0	NA	373.092	NA	NA	NA	0	3205426	0	0	0	NA means under detection limit
373.113	C16 H21 O10	16	21	0	10	0	NA	NA	NA	373.113	NA	0	0	0	24706250	0	NA means under detection limit
373.113	C16 H21 O10	16	21	0	10	0	NA	NA	373.113	NA	NA	0	0	2536524	0	0	NA means under detection limit
373.113	C16 H21 O10	16	21	0	10	0	373.113	NA	NA	NA	NA	2702907	0	0	0	0	NA means under detection limit
373.128	C20 H21 O7	20	21	0	7	0	NA	NA	373.128	NA	NA	0	0	4444241	0	0	NA means under detection limit
373.128	C20 H21 O7	20	21	0	7	0	373.128	NA	NA	NA	NA	4440128	0	0	0	0	NA means under detection limit
373.128	C20 H21 O7	20	21	0	7	0	NA	373.128	NA	NA	NA	0	3674428	0	0	0	NA means under detection limit
373.149	C17 H25 O9	17	25	0	9	0	NA	NA	NA	373.149	NA	0	0	0	29117656	0	NA means under detection limit
373.149	C17 H25 O9	17	25	0	9	0	NA	NA	373.149	NA	NA	0	0	6378583	0	0	NA means under detection limit
373.149	C17 H25 O9	17	25	0	9	0	373.149	NA	NA	NA	NA	7545927	0	0	0	0	NA means under detection limit
373.149	C17 H25 O9	17	25	0	9	0	NA	373.149	NA	NA	NA	0	6303042	0	0	0	NA means under detection limit
373.165	C21 H25 O6	21	25	0	6	0	NA	NA	373.165	NA	NA	0	0	3493980	0	0	NA means under detection limit
373.165	C21 H25 O6	21	25	0	6	0	373.165	NA	NA	NA	NA	4017228	0	0	0	0	NA means under detection limit
373.165	C21 H25 O6	21	25	0	6	0	NA	373.165	NA	NA	NA	0	3208007	0	0	0	NA means under detection limit
373.201	C22 H29 O5	22	29	0	5	0	NA	NA	373.201	NA	NA	0	0	2784359	0	0	NA means under detection limit
374.123	C19 H20 N O7	19	20	1	7	0	NA	NA	374.123	NA	NA	0	0	2566018	0	0	NA means under detection limit
374.363	C22 H48 N O3	22	48	1	3	0	NA	NA	NA	374.363	NA	0	0	0	18181800	0	NA means under detection limit
375.071	C18 H15 O9	18	15	0	9	0	NA	NA	NA	375.071	NA	0	0	0	4112312	0	NA means under detection limit
375.071	C18 H15 O9	18	15	0	9	0	NA	NA	375.071	NA	NA	0	0	3114662	0	0	NA means under detection limit
375.071	C18 H15 O9	18	15	0	9	0	375.071	NA	NA	NA	NA	3568313	0	0	0	0	NA means under detection limit
375.071	C18 H15 O9	18	15	0	9	0	NA	375.071	NA	NA	NA	0	2933618	0	0	0	NA means under detection limit
375.092	C15 H19 O11	15	19	0	11	0	NA	NA	NA	375.092	NA	0	0	0	7182272	0	NA means under detection limit
375.107	C19 H19 O8	19	19	0	8	0	NA	NA	NA	375.107	NA	0	0	0	6297542	0	NA means under detection limit
375.107	C19 H19 O8	19	19	0	8	0	NA	NA	375.107	NA	NA	0	0	5480113	0	0	NA means under detection limit
375.107	C19 H19 O8	19	19	0	8	0	375.107	NA	NA	NA	NA	6402757	0	0	0	0	NA means under detection limit
375.107	C19 H19 O8	19	19	0	8	0	NA	375.107	NA	NA	NA	0	5323644	0	0	0	NA means under detection limit
375.129	C16 H23 O10	16	23	0	10	0	NA	NA	NA	375.129	NA	0	0	0	8863693	0	NA means under detection limit
375.144	C20 H23 O7	20	23	0	7	0	NA	NA	NA	375.144	NA	0	0	0	5261268	0	NA means under detection limit
375.144	C20 H23 O7	20	23	0	7	0	NA	NA	375.144	NA	NA	0	0	5628604	0	0	NA means under detection limit
375.144	C20 H23 O7	20	23	0	7	0	375.144	NA	NA	NA	NA	6039249	0	0	0	0	NA means under detection limit
375.144	C20 H23 O7	20	23	0	7	0	NA	375.144	NA	NA	NA	0	5857159	0	0	0	NA means under detection limit
375.18	C21 H27 O6	21	27	0	6	0	NA	NA	375.18	NA	NA	0	0	3445447	0	0	NA means under detection limit
375.18	C21 H27 O6	21	27	0	6	0	375.18	NA	NA	NA	NA	4275933	0	0	0	0	NA means under detection limit
375.18	C21 H27 O6	21	27	0	6	0	NA	375.18	NA	NA	NA	0	3122066	0	0	0	NA means under detection limit
376.139	C19 H22 N O7	19	22	1	7	0	NA	NA	376.139	NA	NA	0	0	3337198	0	0	NA means under detection limit
376.139	C19 H22 N O7	19	22	1	7	0	376.139	NA	NA	NA	NA	4377620	0	0	0	0	NA means under detection limit
376.139	C19 H22 N O7	19	22	1	7	0	NA	376.139	NA	NA	NA	0	3097770	0	0	0	NA means under detection limit
377.05	C17 H13 O10	17	13	0	10	0	NA	NA	NA	377.05	NA	0	0	0	4266671	0	NA means under detection limit
377.075	C11 H21 O12 S	11	21	0	12	1	NA	NA	NA	377.075	NA	0	0	0	3078328	0	NA means under detection limit
377.087	C18 H17 O9	18	17	0	9	0	NA	NA	NA	377.087	NA	0	0	0	12647100	0	NA means under detection limit
377.087	C18 H17 O9	18	17	0	9	0	NA	NA	377.087	NA	NA	0	0	8233233	0	0	NA means under detection limit
377.087	C18 H17 O9	18	17	0	9	0	377.087	NA	NA	NA	NA	8130887	0	0	0	0	NA means under detection limit
377.087	C18 H17 O9	18	17	0	9	0	NA	377.087	NA	NA	NA	0	6603199	0	0	0	NA means under detection limit
377.123	C19 H21 O8	19	21	0	8	0	NA	NA	NA	377.123	NA	0	0	0	11297482	0	NA means under detection limit
377.123	C19 H21 O8	19	21	0	8	0	NA	NA	377.123	NA	NA	0	0	8679707	0	0	NA means under detection limit
377.123	C19 H21 O8	19	21	0	8	0	377.123	NA	NA	NA	NA	10271058	0	0	0	0	NA means under detection limit
377.123	C19 H21 O8	19	21	0	8	0	NA	377.123	NA	NA	NA	0	8597961	0	0	0	NA means under detection limit
377.159	C20 H25 O7	20	25	0	7	0	NA	NA	NA	377.159	NA	0	0	0	2691800	0	NA means under detection limit
377.159	C20 H25 O7	20	25	0	7	0	NA	NA	377.159	NA	NA	0	0	5337383	0	0	NA means under detection limit
377.159	C20 H25 O7	20	25	0	7	0	377.159	NA	NA	NA	NA	5237086	0	0	0	0	NA means under detection limit
377.159	C20 H25 O7	20	25	0	7	0	NA	377.159	NA	NA	NA	0	4097492	0	0	0	NA means under detection limit
378.122	C15 H24 N O8 S	15	24	1	8	1	NA	NA	NA	378.122	NA	0	0	0	8055882	0	NA means under detection limit
378.155	C19 H24 N O7	19	24	1	7	0	NA	NA	378.155	NA	NA	0	0	2891352	0	0	NA means under detection limit
378.155	C19 H24 N O7	19	24	1	7	0	378.155	NA	NA	NA	NA	3457695	0	0	0	0	NA means under detection limit
378.155	C19 H24 N O7	19	24	1	7	0	NA	378.155	NA	NA	NA	0	2813687	0	0	0	NA means under detection limit
379.066	C17 H15 O10	17	15	0	10	0	NA	NA	NA	379.066	NA	0	0	0	32916916	0	NA means under detection limit
379.066	C17 H15 O10	17	15	0	10	0	NA	NA	379.066	NA	NA	0	0	5687151	0	0	NA means under detection limit
379.066	C17 H15 O10	17	15	0	10	0	379.066	NA	NA	NA	NA	7123908	0	0	0	0	NA means under detection limit
379.066	C17 H15 O10	17	15	0	10	0	NA	379.066	NA	NA	NA	0	5601283	0	0	0	NA means under detection limit
379.069	C14 H19 O10 S	14	19	0	10	1	NA	NA	NA	379.069	NA	0	0	0	17896884	0	NA means under detection limit
379.102	C18 H19 O9	18	19	0	9	0	NA	NA	NA	379.102	NA	0	0	0	40887744	0	NA means under detection limit
379.102	C18 H19 O9	18	19	0	9	0	NA	NA	379.102	NA	NA	0	0	13020026	0	0	NA means under detection limit
379.102	C18 H19 O9	18	19	0	9	0	379.102	NA	NA	NA	NA	14539727	0	0	0	0	NA means under detection limit
379.102	C18 H19 O9	18	19	0	9	0	NA	379.102	NA	NA	NA	0	11742221	0	0	0	NA means under detection limit
379.139	C19 H23 O8	19	23	0	8	0	NA	NA	NA	379.139	NA	0	0	0	14116304	0	NA means under detection limit
379.139	C19 H23 O8	19	23	0	8	0	NA	NA	379.139	NA	NA	0	0	8655749	0	0	NA means under detection limit
379.139	C19 H23 O8	19	23	0	8	0	379.139	NA	NA	NA	NA	9464795	0	0	0	0	NA means under detection limit
379.139	C19 H23 O8	19	23	0	8	0	NA	379.139	NA	NA	NA	0	7418904	0	0	0	NA means under detection limit
379.175	C20 H27 O7	20	27	0	7	0	NA	NA	379.175	NA	NA	0	0	3633040	0	0	NA means under detection limit
379.175	C20 H27 O7	20	27	0	7	0	379.175	NA	NA	NA	NA	3342311	0	0	0	0	NA means under detection limit
379.175	C20 H27 O7	20	27	0	7	0	NA	379.175	NA	NA	NA	0	2747426	0	0	0	NA means under detection limit
379.321	C24 H43 O3	24	43	0	3	0	NA	NA	NA	NA	379.321	0	0	0	0	2616909	NA means under detection limit
380.101	C14 H22 N O9 S	14	22	1	9	1	NA	NA	NA	380.101	NA	0	0	0	21354304	0	NA means under detection limit
380.137	C15 H26 N O8 S	15	26	1	8	1	NA	NA	NA	380.137	NA	0	0	0	3198287	0	NA means under detection limit
380.17	C19 H26 N O7	19	26	1	7	0	380.17	NA	NA	NA	NA	3029285	0	0	0	0	NA means under detection limit
381.045	C16 H13 O11	16	13	0	11	0	381.045	NA	NA	NA	NA	3310652	0	0	0	0	NA means under detection limit
381.045	C16 H13 O11	16	13	0	11	0	NA	NA	NA	381.045	NA	0	0	0	11057322	0	NA means under detection limit
381.082	C17 H17 O10	17	17	0	10	0	NA	NA	NA	381.082	NA	0	0	0	54847672	0	NA means under detection limit
381.082	C17 H17 O10	17	17	0	10	0	NA	NA	381.082	NA	NA	0	0	15105493	0	0	NA means under detection limit
381.082	C17 H17 O10	17	17	0	10	0	381.082	NA	NA	NA	NA	17231432	0	0	0	0	NA means under detection limit
381.082	C17 H17 O10	17	17	0	10	0	NA	381.082	NA	NA	NA	0	15070801	0	0	0	NA means under detection limit
381.085	C14 H21 O10 S	14	21	0	10	1	NA	NA	NA	381.085	NA	0	0	0	12093626	0	NA means under detection limit
381.118	C18 H21 O9	18	21	0	9	0	NA	NA	NA	381.118	NA	0	0	0	62613704	0	NA means under detection limit
381.118	C18 H21 O9	18	21	0	9	0	NA	NA	381.118	NA	NA	0	0	17079776	0	0	NA means under detection limit
381.118	C18 H21 O9	18	21	0	9	0	381.118	NA	NA	NA	NA	20459090	0	0	0	0	NA means under detection limit
381.118	C18 H21 O9	18	21	0	9	0	NA	381.118	NA	NA	NA	0	17540700	0	0	0	NA means under detection limit
381.154	C19 H25 O8	19	25	0	8	0	NA	NA	NA	381.154	NA	0	0	0	34900180	0	NA means under detection limit
381.154	C19 H25 O8	19	25	0	8	0	NA	NA	381.154	NA	NA	0	0	9377259	0	0	NA means under detection limit
381.154	C19 H25 O8	19	25	0	8	0	381.154	NA	NA	NA	NA	11159134	0	0	0	0	NA means under detection limit
381.154	C19 H25 O8	19	25	0	8	0	NA	381.154	NA	NA	NA	0	9455207	0	0	0	NA means under detection limit
381.336	C24 H45 O3	24	45	0	3	0	NA	NA	NA	NA	381.336	0	0	0	0	2961052	NA means under detection limit
381.373	C25 H49 O2	25	49	0	2	0	NA	NA	NA	NA	381.373	0	0	0	0	2757799	NA means under detection limit
382.117	C14 H24 N O9 S	14	24	1	9	1	NA	NA	NA	382.117	NA	0	0	0	2994244	0	NA means under detection limit
382.153	C15 H28 N O8 S	15	28	1	8	1	NA	NA	NA	382.153	NA	0	0	0	6477394	0	NA means under detection limit
382.332	C23 H44 N O3	23	44	1	3	0	NA	NA	NA	382.332	NA	0	0	0	2795159	0	NA means under detection limit
383.061	C16 H15 O11	16	15	0	11	0	NA	NA	383.061	NA	NA	0	0	3954734	0	0	NA means under detection limit
383.061	C16 H15 O11	16	15	0	11	0	383.061	NA	NA	NA	NA	9281721	0	0	0	0	NA means under detection limit
383.061	C16 H15 O11	16	15	0	11	0	NA	383.061	NA	NA	NA	0	5096598	0	0	0	NA means under detection limit
383.061	C16 H15 O11	16	15	0	11	0	NA	NA	NA	383.061	NA	0	0	0	24013740	0	NA means under detection limit
383.097	C17 H19 O10	17	19	0	10	0	NA	NA	NA	383.097	NA	0	0	0	136211392	0	NA means under detection limit
383.097	C17 H19 O10	17	19	0	10	0	NA	NA	383.097	NA	NA	0	0	18251832	0	0	NA means under detection limit
383.097	C17 H19 O10	17	19	0	10	0	383.097	NA	NA	NA	NA	22270148	0	0	0	0	NA means under detection limit
383.097	C17 H19 O10	17	19	0	10	0	NA	383.097	NA	NA	NA	0	16717984	0	0	0	NA means under detection limit
383.134	C18 H23 O9	18	23	0	9	0	NA	NA	NA	383.134	NA	0	0	0	39119816	0	NA means under detection limit
383.134	C18 H23 O9	18	23	0	9	0	NA	NA	383.134	NA	NA	0	0	11159620	0	0	NA means under detection limit
383.134	C18 H23 O9	18	23	0	9	0	383.134	NA	NA	NA	NA	12370127	0	0	0	0	NA means under detection limit
383.134	C18 H23 O9	18	23	0	9	0	NA	383.134	NA	NA	NA	0	10954923	0	0	0	NA means under detection limit
383.149	C22 H23 O6	22	23	0	6	0	NA	NA	383.149	NA	NA	0	0	3012680	0	0	NA means under detection limit
383.149	C22 H23 O6	22	23	0	6	0	NA	383.149	NA	NA	NA	0	3134128	0	0	0	NA means under detection limit
383.17	C19 H27 O8	19	27	0	8	0	NA	NA	NA	383.17	NA	0	0	0	3926487	0	NA means under detection limit
383.316	C23 H43 O4	23	43	0	4	0	NA	NA	NA	NA	383.316	0	0	0	0	5060731	NA means under detection limit
383.316	C23 H43 O4	23	43	0	4	0	NA	NA	NA	NA	383.316	0	0	0	0	5145865	NA means under detection limit
383.316	C23 H43 O4	23	43	0	4	0	NA	NA	NA	NA	383.316	0	0	0	0	6351073	NA means under detection limit
383.316	C23 H43 O4	23	43	0	4	0	NA	NA	NA	NA	383.316	0	0	0	0	3863566	NA means under detection limit
383.331	C27 H43 O	27	43	0	1	0	NA	NA	NA	NA	383.331	0	0	0	0	3411071	NA means under detection limit
383.331	C27 H43 O	27	43	0	1	0	NA	NA	NA	NA	383.331	0	0	0	0	2604301	NA means under detection limit
383.331	C27 H43 O	27	43	0	1	0	NA	NA	NA	NA	383.331	0	0	0	0	3042021	NA means under detection limit
383.331	C27 H43 O	27	43	0	1	0	NA	NA	NA	NA	383.331	0	0	0	0	4555796	NA means under detection limit
384.132	C14 H26 N O9 S	14	26	1	9	1	NA	NA	NA	384.132	NA	0	0	0	3777861	0	NA means under detection limit
384.347	C23 H46 N O3	23	46	1	3	0	NA	NA	NA	384.347	NA	0	0	0	6005143	0	NA means under detection limit
385.077	C16 H17 O11	16	17	0	11	0	NA	NA	385.077	NA	NA	0	0	9366157	0	0	NA means under detection limit
385.077	C16 H17 O11	16	17	0	11	0	385.077	NA	NA	NA	NA	13390637	0	0	0	0	NA means under detection limit
385.077	C16 H17 O11	16	17	0	11	0	NA	385.077	NA	NA	NA	0	8692452	0	0	0	NA means under detection limit
385.077	C16 H17 O11	16	17	0	11	0	NA	NA	NA	385.077	NA	0	0	0	81817264	0	NA means under detection limit
385.092	C20 H17 O8	20	17	0	8	0	NA	385.092	NA	NA	NA	0	2634472	0	0	0	NA means under detection limit
385.113	C17 H21 O10	17	21	0	10	0	NA	NA	NA	385.113	NA	0	0	0	213577408	0	NA means under detection limit
385.113	C17 H21 O10	17	21	0	10	0	NA	NA	385.113	NA	NA	0	0	43029144	0	0	NA means under detection limit
385.113	C17 H21 O10	17	21	0	10	0	385.113	NA	NA	NA	NA	56963896	0	0	0	0	NA means under detection limit
385.113	C17 H21 O10	17	21	0	10	0	NA	385.113	NA	NA	NA	0	43174640	0	0	0	NA means under detection limit
385.128	C21 H21 O7	21	21	0	7	0	NA	NA	385.128	NA	NA	0	0	3362460	0	0	NA means under detection limit
385.128	C21 H21 O7	21	21	0	7	0	385.128	NA	NA	NA	NA	3300157	0	0	0	0	NA means under detection limit
385.128	C21 H21 O7	21	21	0	7	0	NA	385.128	NA	NA	NA	0	3603187	0	0	0	NA means under detection limit
385.149	C18 H25 O9	18	25	0	9	0	NA	NA	NA	385.149	NA	0	0	0	72330952	0	NA means under detection limit
385.149	C18 H25 O9	18	25	0	9	0	NA	NA	385.149	NA	NA	0	0	7926435	0	0	NA means under detection limit
385.149	C18 H25 O9	18	25	0	9	0	385.149	NA	NA	NA	NA	8997700	0	0	0	0	NA means under detection limit
385.149	C18 H25 O9	18	25	0	9	0	NA	385.149	NA	NA	NA	0	7584505	0	0	0	NA means under detection limit
385.331	C23 H45 O4	23	45	0	4	0	NA	NA	385.331	NA	NA	0	0	3069657	0	0	NA means under detection limit
385.331	C23 H45 O4	23	45	0	4	0	385.331	NA	NA	NA	NA	3033980	0	0	0	0	NA means under detection limit
385.331	C23 H45 O4	23	45	0	4	0	NA	385.331	NA	NA	NA	0	2826542	0	0	0	NA means under detection limit
385.346	C27 H45 O	27	45	0	1	0	NA	NA	NA	NA	385.346	0	0	0	0	2872030	NA means under detection limit
385.346	C27 H45 O	27	45	0	1	0	NA	NA	NA	NA	385.346	0	0	0	0	3356545	NA means under detection limit
385.346	C27 H45 O	27	45	0	1	0	NA	NA	NA	NA	385.346	0	0	0	0	4011795	NA means under detection limit
386.326	C22 H44 N O4	22	44	1	4	0	NA	NA	NA	386.326	NA	0	0	0	3101830	0	NA means under detection limit
386.363	C23 H48 N O3	23	48	1	3	0	NA	NA	NA	386.363	NA	0	0	0	7956628	0	NA means under detection limit
387.056	C15 H15 O12	15	15	0	12	0	NA	NA	NA	387.056	NA	0	0	0	2822553	0	NA means under detection limit
387.092	C16 H19 O11	16	19	0	11	0	NA	NA	387.092	NA	NA	0	0	8199399	0	0	NA means under detection limit
387.092	C16 H19 O11	16	19	0	11	0	387.092	NA	NA	NA	NA	11478424	0	0	0	0	NA means under detection limit
387.092	C16 H19 O11	16	19	0	11	0	NA	387.092	NA	NA	NA	0	6294832	0	0	0	NA means under detection limit
387.092	C16 H19 O11	16	19	0	11	0	NA	NA	NA	387.092	NA	0	0	0	87945640	0	NA means under detection limit
387.107	C20 H19 O8	20	19	0	8	0	NA	NA	387.107	NA	NA	0	0	7888107	0	0	NA means under detection limit
387.107	C20 H19 O8	20	19	0	8	0	387.107	NA	NA	NA	NA	7234973	0	0	0	0	NA means under detection limit
387.107	C20 H19 O8	20	19	0	8	0	NA	387.107	NA	NA	NA	0	6451508	0	0	0	NA means under detection limit
387.119	C13 H25 N O10 S	13	25	1	10	1	NA	NA	NA	387.12	NA	0	0	0	3162545	0	NA means under detection limit
387.129	C17 H23 O10	17	23	0	10	0	387.129	NA	NA	NA	NA	2872740	0	0	0	0	NA means under detection limit
387.129	C17 H23 O10	17	23	0	10	0	NA	387.129	NA	NA	NA	0	3370298	0	0	0	NA means under detection limit
387.129	C17 H23 O10	17	23	0	10	0	NA	NA	NA	387.129	NA	0	0	0	25850292	0	NA means under detection limit
387.144	C21 H23 O7	21	23	0	7	0	NA	NA	387.144	NA	NA	0	0	4917494	0	0	NA means under detection limit
387.144	C21 H23 O7	21	23	0	7	0	387.144	NA	NA	NA	NA	5045672	0	0	0	0	NA means under detection limit
387.144	C21 H23 O7	21	23	0	7	0	NA	387.144	NA	NA	NA	0	4326719	0	0	0	NA means under detection limit
387.165	C18 H27 O9	18	27	0	9	0	NA	NA	NA	387.165	NA	0	0	0	76001728	0	NA means under detection limit
387.165	C18 H27 O9	18	27	0	9	0	NA	NA	387.165	NA	NA	0	0	29422844	0	0	NA means under detection limit
387.165	C18 H27 O9	18	27	0	9	0	387.165	NA	NA	NA	NA	32945582	0	0	0	0	NA means under detection limit
387.165	C18 H27 O9	18	27	0	9	0	NA	387.165	NA	NA	NA	0	27970884	0	0	0	NA means under detection limit
387.18	C22 H27 O6	22	27	0	6	0	NA	NA	387.18	NA	NA	0	0	3022593	0	0	NA means under detection limit
387.18	C22 H27 O6	22	27	0	6	0	387.18	NA	NA	NA	NA	3919283	0	0	0	0	NA means under detection limit
387.18	C22 H27 O6	22	27	0	6	0	NA	387.18	NA	NA	NA	0	3085641	0	0	0	NA means under detection limit
387.201	C19 H31 O8	19	31	0	8	0	NA	NA	387.201	NA	NA	0	0	2679559	0	0	NA means under detection limit
387.201	C19 H31 O8	19	31	0	8	0	387.201	NA	NA	NA	NA	2830266	0	0	0	0	NA means under detection limit
387.201	C19 H31 O8	19	31	0	8	0	NA	387.201	NA	NA	NA	0	3250512	0	0	0	NA means under detection limit
388.139	C20 H22 N O7	20	22	1	7	0	388.139	NA	NA	NA	NA	3122902	0	0	0	0	NA means under detection limit
388.342	C22 H46 N O4	22	46	1	4	0	NA	NA	NA	388.342	NA	0	0	0	2670973	0	NA means under detection limit
388.379	C23 H50 N O3	23	50	1	3	0	NA	NA	NA	388.379	NA	0	0	0	4909963	0	NA means under detection limit
389.071	C15 H17 O12	15	17	0	12	0	NA	NA	NA	389.071	NA	0	0	0	10433678	0	NA means under detection limit
389.087	C19 H17 O9	19	17	0	9	0	NA	NA	NA	389.087	NA	0	0	0	5366932	0	NA means under detection limit
389.087	C19 H17 O9	19	17	0	9	0	NA	NA	389.087	NA	NA	0	0	4861748	0	0	NA means under detection limit
389.087	C19 H17 O9	19	17	0	9	0	389.087	NA	NA	NA	NA	4468723	0	0	0	0	NA means under detection limit
389.087	C19 H17 O9	19	17	0	9	0	NA	389.087	NA	NA	NA	0	4491123	0	0	0	NA means under detection limit
389.09	C16 H21 O9 S	16	21	0	9	1	NA	NA	NA	389.09	NA	0	0	0	10423445	0	NA means under detection limit
389.108	C16 H21 O11	16	21	0	11	0	NA	NA	NA	389.108	NA	0	0	0	17122460	0	NA means under detection limit
389.123	C20 H21 O8	20	21	0	8	0	NA	NA	NA	389.123	NA	0	0	0	6001826	0	NA means under detection limit
389.123	C20 H21 O8	20	21	0	8	0	NA	NA	389.123	NA	NA	0	0	7118655	0	0	NA means under detection limit
389.123	C20 H21 O8	20	21	0	8	0	389.123	NA	NA	NA	NA	7919614	0	0	0	0	NA means under detection limit
389.123	C20 H21 O8	20	21	0	8	0	NA	389.123	NA	NA	NA	0	6012798	0	0	0	NA means under detection limit
389.144	C17 H25 O10	17	25	0	10	0	NA	NA	NA	389.144	NA	0	0	0	7889066	0	NA means under detection limit
389.159	C21 H25 O7	21	25	0	7	0	NA	NA	389.16	NA	NA	0	0	4950857	0	0	NA means under detection limit
389.159	C21 H25 O7	21	25	0	7	0	389.159	NA	NA	NA	NA	6597641	0	0	0	0	NA means under detection limit
389.159	C21 H25 O7	21	25	0	7	0	NA	389.159	NA	NA	NA	0	5056392	0	0	0	NA means under detection limit
389.196	C22 H29 O6	22	29	0	6	0	389.196	NA	NA	NA	NA	3247123	0	0	0	0	NA means under detection limit
390.155	C20 H24 N O7	20	24	1	7	0	NA	NA	390.155	NA	NA	0	0	2606188	0	0	NA means under detection limit
390.155	C20 H24 N O7	20	24	1	7	0	390.155	NA	NA	NA	NA	3028784	0	0	0	0	NA means under detection limit
390.155	C20 H24 N O7	20	24	1	7	0	NA	390.155	NA	NA	NA	0	3981480	0	0	0	NA means under detection limit
391.066	C18 H15 O10	18	15	0	10	0	NA	NA	391.066	NA	NA	0	0	4065653	0	0	NA means under detection limit
391.066	C18 H15 O10	18	15	0	10	0	391.066	NA	NA	NA	NA	4570685	0	0	0	0	NA means under detection limit
391.066	C18 H15 O10	18	15	0	10	0	NA	391.066	NA	NA	NA	0	4238766	0	0	0	NA means under detection limit
391.066	C18 H15 O10	18	15	0	10	0	NA	NA	NA	391.066	NA	0	0	0	4674421	0	NA means under detection limit
391.087	C15 H19 O12	15	19	0	12	0	NA	NA	NA	391.087	NA	0	0	0	5536636	0	NA means under detection limit
391.09	C12 H23 O12 S	12	23	0	12	1	NA	NA	NA	NA	391.09	0	0	0	0	5040509	NA means under detection limit
391.09	C12 H23 O12 S	12	23	0	12	1	NA	NA	NA	NA	391.09	0	0	0	0	6330948	NA means under detection limit
391.09	C12 H23 O12 S	12	23	0	12	1	NA	NA	NA	NA	391.09	0	0	0	0	4666805	NA means under detection limit
391.102	C19 H19 O9	19	19	0	9	0	NA	NA	NA	391.102	NA	0	0	0	13700994	0	NA means under detection limit
391.102	C19 H19 O9	19	19	0	9	0	NA	NA	391.102	NA	NA	0	0	8876416	0	0	NA means under detection limit
391.102	C19 H19 O9	19	19	0	9	0	391.102	NA	NA	NA	NA	9499207	0	0	0	0	NA means under detection limit
391.102	C19 H19 O9	19	19	0	9	0	NA	391.102	NA	NA	NA	0	7930297	0	0	0	NA means under detection limit
391.139	C20 H23 O8	20	23	0	8	0	NA	NA	NA	391.139	NA	0	0	0	7813008	0	NA means under detection limit
391.139	C20 H23 O8	20	23	0	8	0	NA	NA	391.139	NA	NA	0	0	8069515	0	0	NA means under detection limit
391.139	C20 H23 O8	20	23	0	8	0	391.139	NA	NA	NA	NA	9558610	0	0	0	0	NA means under detection limit
391.139	C20 H23 O8	20	23	0	8	0	NA	391.139	NA	NA	NA	0	7457219	0	0	0	NA means under detection limit
391.175	C21 H27 O7	21	27	0	7	0	NA	NA	391.175	NA	NA	0	0	3989909	0	0	NA means under detection limit
391.175	C21 H27 O7	21	27	0	7	0	391.175	NA	NA	NA	NA	4506205	0	0	0	0	NA means under detection limit
391.175	C21 H27 O7	21	27	0	7	0	NA	391.175	NA	NA	NA	0	2653646	0	0	0	NA means under detection limit
391.284	C24 H39 O4	24	39	0	4	0	NA	NA	NA	NA	391.284	0	0	0	0	3824053	NA means under detection limit
391.284	C24 H39 O4	24	39	0	4	0	NA	NA	NA	NA	391.284	0	0	0	0	4068988	NA means under detection limit
391.284	C24 H39 O4	24	39	0	4	0	NA	NA	NA	NA	391.284	0	0	0	0	4560365	NA means under detection limit
391.284	C24 H39 O4	24	39	0	4	0	NA	NA	NA	NA	391.284	0	0	0	0	4925381	NA means under detection limit
393.045	C17 H13 O11	17	13	0	11	0	NA	NA	NA	393.045	NA	0	0	0	3549773	0	NA means under detection limit
393.082	C18 H17 O10	18	17	0	10	0	NA	NA	393.082	NA	NA	0	0	10159033	0	0	NA means under detection limit
393.082	C18 H17 O10	18	17	0	10	0	393.082	NA	NA	NA	NA	10640516	0	0	0	0	NA means under detection limit
393.082	C18 H17 O10	18	17	0	10	0	NA	393.082	NA	NA	NA	0	8485872	0	0	0	NA means under detection limit
393.082	C18 H17 O10	18	17	0	10	0	NA	NA	NA	393.082	NA	0	0	0	32225882	0	NA means under detection limit
393.085	C15 H21 O10 S	15	21	0	10	1	NA	NA	NA	393.085	NA	0	0	0	14604891	0	NA means under detection limit
393.118	C19 H21 O9	19	21	0	9	0	NA	NA	NA	393.118	NA	0	0	0	23513704	0	NA means under detection limit
393.118	C19 H21 O9	19	21	0	9	0	NA	NA	393.118	NA	NA	0	0	12196804	0	0	NA means under detection limit
393.118	C19 H21 O9	19	21	0	9	0	393.118	NA	NA	NA	NA	14154894	0	0	0	0	NA means under detection limit
393.118	C19 H21 O9	19	21	0	9	0	NA	393.118	NA	NA	NA	0	11025402	0	0	0	NA means under detection limit
393.154	C20 H25 O8	20	25	0	8	0	NA	NA	NA	393.154	NA	0	0	0	7977589	0	NA means under detection limit
393.154	C20 H25 O8	20	25	0	8	0	NA	NA	393.154	NA	NA	0	0	6577103	0	0	NA means under detection limit
393.154	C20 H25 O8	20	25	0	8	0	393.154	NA	NA	NA	NA	6155417	0	0	0	0	NA means under detection limit
393.154	C20 H25 O8	20	25	0	8	0	NA	393.154	NA	NA	NA	0	5176325	0	0	0	NA means under detection limit
393.191	C21 H29 O7	21	29	0	7	0	NA	NA	393.191	NA	NA	0	0	2763737	0	0	NA means under detection limit
394.117	C15 H24 N O9 S	15	24	1	9	1	NA	NA	NA	394.117	NA	0	0	0	19745748	0	NA means under detection limit
395.061	C17 H15 O11	17	15	0	11	0	NA	NA	395.061	NA	NA	0	0	4922859	0	0	NA means under detection limit
395.061	C17 H15 O11	17	15	0	11	0	395.061	NA	NA	NA	NA	7681715	0	0	0	0	NA means under detection limit
395.061	C17 H15 O11	17	15	0	11	0	NA	395.061	NA	NA	NA	0	4483618	0	0	0	NA means under detection limit
395.061	C17 H15 O11	17	15	0	11	0	NA	NA	NA	395.061	NA	0	0	0	26934570	0	NA means under detection limit
395.097	C18 H19 O10	18	19	0	10	0	NA	NA	395.097	NA	NA	0	0	16379381	0	0	NA means under detection limit
395.097	C18 H19 O10	18	19	0	10	0	395.097	NA	NA	NA	NA	17264316	0	0	0	0	NA means under detection limit
395.097	C18 H19 O10	18	19	0	10	0	NA	395.097	NA	NA	NA	0	16414252	0	0	0	NA means under detection limit
395.097	C18 H19 O10	18	19	0	10	0	NA	NA	NA	395.097	NA	0	0	0	45940024	0	NA means under detection limit
395.101	C15 H23 O10 S	15	23	0	10	1	NA	NA	NA	395.101	NA	0	0	0	139689264	0	NA means under detection limit
395.134	C19 H23 O9	19	23	0	9	0	NA	NA	NA	395.134	NA	0	0	0	31538500	0	NA means under detection limit
395.134	C19 H23 O9	19	23	0	9	0	NA	NA	395.134	NA	NA	0	0	8730111	0	0	NA means under detection limit
395.134	C19 H23 O9	19	23	0	9	0	395.134	NA	NA	NA	NA	9752263	0	0	0	0	NA means under detection limit
395.134	C19 H23 O9	19	23	0	9	0	NA	395.134	NA	NA	NA	0	9115190	0	0	0	NA means under detection limit
395.17	C20 H27 O8	20	27	0	8	0	NA	NA	NA	395.17	NA	0	0	0	4600145	0	NA means under detection limit
395.17	C20 H27 O8	20	27	0	8	0	NA	NA	395.17	NA	NA	0	0	2949129	0	0	NA means under detection limit
395.17	C20 H27 O8	20	27	0	8	0	395.17	NA	NA	NA	NA	3940049	0	0	0	0	NA means under detection limit
395.17	C20 H27 O8	20	27	0	8	0	NA	395.17	NA	NA	NA	0	2950209	0	0	0	NA means under detection limit
395.425	C27 H55 O	27	55	0	1	0	NA	NA	395.425	NA	NA	0	0	3879505	0	0	NA means under detection limit
396.259	C18 H38 N O8	18	38	1	8	0	NA	NA	NA	396.259	NA	0	0	0	3031769	0	NA means under detection limit
397.04	C16 H13 O12	16	13	0	12	0	NA	NA	NA	397.04	NA	0	0	0	5790704	0	NA means under detection limit
397.077	C17 H17 O11	17	17	0	11	0	NA	NA	397.076	NA	NA	0	0	7217181	0	0	NA means under detection limit
397.077	C17 H17 O11	17	17	0	11	0	397.077	NA	NA	NA	NA	14196958	0	0	0	0	NA means under detection limit
397.077	C17 H17 O11	17	17	0	11	0	NA	397.077	NA	NA	NA	0	8935513	0	0	0	NA means under detection limit
397.077	C17 H17 O11	17	17	0	11	0	NA	NA	NA	397.077	NA	0	0	0	101122048	0	NA means under detection limit
397.113	C18 H21 O10	18	21	0	10	0	NA	NA	397.113	NA	NA	0	0	16453671	0	0	NA means under detection limit
397.113	C18 H21 O10	18	21	0	10	0	397.113	NA	NA	NA	NA	19362024	0	0	0	0	NA means under detection limit
397.113	C18 H21 O10	18	21	0	10	0	NA	397.113	NA	NA	NA	0	16124004	0	0	0	NA means under detection limit
397.113	C18 H21 O10	18	21	0	10	0	NA	NA	NA	397.113	NA	0	0	0	82722824	0	NA means under detection limit
397.149	C19 H25 O9	19	25	0	9	0	NA	NA	NA	397.149	NA	0	0	0	26034198	0	NA means under detection limit
397.149	C19 H25 O9	19	25	0	9	0	NA	NA	397.149	NA	NA	0	0	6633521	0	0	NA means under detection limit
397.149	C19 H25 O9	19	25	0	9	0	397.149	NA	NA	NA	NA	6832370	0	0	0	0	NA means under detection limit
397.149	C19 H25 O9	19	25	0	9	0	NA	397.149	NA	NA	NA	0	6594670	0	0	0	NA means under detection limit
398.112	C14 H24 N O10 S	14	24	1	10	1	NA	NA	NA	398.112	NA	0	0	0	3653997	0	NA means under detection limit
398.148	C15 H28 N O9 S	15	28	1	9	1	NA	NA	NA	398.148	NA	0	0	0	3085178	0	NA means under detection limit
398.363	C24 H48 N O3	24	48	1	3	0	NA	NA	NA	398.363	NA	0	0	0	3823046	0	NA means under detection limit
399.056	C16 H15 O12	16	15	0	12	0	NA	NA	NA	399.056	NA	0	0	0	10160826	0	NA means under detection limit
399.092	C17 H19 O11	17	19	0	11	0	NA	NA	399.092	NA	NA	0	0	8577607	0	0	NA means under detection limit
399.092	C17 H19 O11	17	19	0	11	0	399.092	NA	NA	NA	NA	11531004	0	0	0	0	NA means under detection limit
399.092	C17 H19 O11	17	19	0	11	0	NA	399.092	NA	NA	NA	0	8260236	0	0	0	NA means under detection limit
399.092	C17 H19 O11	17	19	0	11	0	NA	NA	NA	399.092	NA	0	0	0	79397576	0	NA means under detection limit
399.107	C21 H19 O8	21	19	0	8	0	NA	399.107	NA	NA	NA	0	2808976	0	0	0	NA means under detection limit
399.129	C18 H23 O10	18	23	0	10	0	NA	NA	399.129	NA	NA	0	0	56230480	0	0	NA means under detection limit
399.129	C18 H23 O10	18	23	0	10	0	399.129	NA	NA	NA	NA	69567240	0	0	0	0	NA means under detection limit
399.129	C18 H23 O10	18	23	0	10	0	NA	399.129	NA	NA	NA	0	55687828	0	0	0	NA means under detection limit
399.129	C18 H23 O10	18	23	0	10	0	NA	NA	NA	399.129	NA	0	0	0	368706272	0	NA means under detection limit
399.144	C22 H23 O7	22	23	0	7	0	NA	NA	399.144	NA	NA	0	0	2622549	0	0	NA means under detection limit
399.144	C22 H23 O7	22	23	0	7	0	399.144	NA	NA	NA	NA	3113738	0	0	0	0	NA means under detection limit
399.144	C22 H23 O7	22	23	0	7	0	NA	399.144	NA	NA	NA	0	2693274	0	0	0	NA means under detection limit
399.165	C19 H27 O9	19	27	0	9	0	NA	NA	NA	399.165	NA	0	0	0	34906848	0	NA means under detection limit
399.165	C19 H27 O9	19	27	0	9	0	NA	NA	399.165	NA	NA	0	0	7967323	0	0	NA means under detection limit
399.165	C19 H27 O9	19	27	0	9	0	399.165	NA	NA	NA	NA	9933583	0	0	0	0	NA means under detection limit
399.165	C19 H27 O9	19	27	0	9	0	NA	399.165	NA	NA	NA	0	7398048	0	0	0	NA means under detection limit
399.18	C23 H27 O6	23	27	0	6	0	399.18	NA	NA	NA	NA	2856212	0	0	0	0	NA means under detection limit
400.342	C23 H46 N O4	23	46	1	4	0	NA	NA	NA	400.342	NA	0	0	0	3698301	0	NA means under detection limit
400.379	C24 H50 N O3	24	50	1	3	0	NA	NA	NA	400.379	NA	0	0	0	8969354	0	NA means under detection limit
401.071	C16 H17 O12	16	17	0	12	0	NA	NA	NA	401.071	NA	0	0	0	7908732	0	NA means under detection limit
401.108	C17 H21 O11	17	21	0	11	0	NA	NA	401.108	NA	NA	0	0	8313960	0	0	NA means under detection limit
401.108	C17 H21 O11	17	21	0	11	0	401.108	NA	NA	NA	NA	11631885	0	0	0	0	NA means under detection limit
401.108	C17 H21 O11	17	21	0	11	0	NA	401.108	NA	NA	NA	0	7726265	0	0	0	NA means under detection limit
401.108	C17 H21 O11	17	21	0	11	0	NA	NA	NA	401.108	NA	0	0	0	86001032	0	NA means under detection limit
401.123	C21 H21 O8	21	21	0	8	0	NA	NA	401.123	NA	NA	0	0	4063340	0	0	NA means under detection limit
401.123	C21 H21 O8	21	21	0	8	0	401.123	NA	NA	NA	NA	5096722	0	0	0	0	NA means under detection limit
401.123	C21 H21 O8	21	21	0	8	0	NA	401.123	NA	NA	NA	0	5100733	0	0	0	NA means under detection limit
401.144	C18 H25 O10	18	25	0	10	0	NA	NA	NA	401.144	NA	0	0	0	21018004	0	NA means under detection limit
401.159	C22 H25 O7	22	25	0	7	0	NA	NA	401.159	NA	NA	0	0	3725430	0	0	NA means under detection limit
401.159	C22 H25 O7	22	25	0	7	0	401.16	NA	NA	NA	NA	3051803	0	0	0	0	NA means under detection limit
401.181	C19 H29 O9	19	29	0	9	0	NA	NA	NA	401.181	NA	0	0	0	5757346	0	NA means under detection limit
401.196	C23 H29 O6	23	29	0	6	0	NA	NA	401.196	NA	NA	0	0	2757760	0	0	NA means under detection limit
401.217	C20 H33 O8	20	33	0	8	0	NA	NA	401.217	NA	NA	0	0	3780741	0	0	NA means under detection limit
401.217	C20 H33 O8	20	33	0	8	0	401.217	NA	NA	NA	NA	5226794	0	0	0	0	NA means under detection limit
401.217	C20 H33 O8	20	33	0	8	0	NA	401.217	NA	NA	NA	0	4913367	0	0	0	NA means under detection limit
402.155	C21 H24 N O7	21	24	1	7	0	402.155	NA	NA	NA	NA	2575900	0	0	0	0	NA means under detection limit
402.358	C23 H48 N O4	23	48	1	4	0	NA	NA	NA	402.358	NA	0	0	0	4494137	0	NA means under detection limit
402.394	C24 H52 N O3	24	52	1	3	0	NA	NA	NA	402.394	NA	0	0	0	12136262	0	NA means under detection limit
403.069	C16 H19 O10 S	16	19	0	10	1	NA	NA	NA	403.069	NA	0	0	0	8554542	0	NA means under detection limit
403.087	C16 H19 O12	16	19	0	12	0	NA	NA	NA	403.087	NA	0	0	0	37701684	0	NA means under detection limit
403.102	C20 H19 O9	20	19	0	9	0	NA	NA	NA	403.102	NA	0	0	0	4580410	0	NA means under detection limit
403.102	C20 H19 O9	20	19	0	9	0	NA	NA	403.102	NA	NA	0	0	4730492	0	0	NA means under detection limit
403.102	C20 H19 O9	20	19	0	9	0	403.102	NA	NA	NA	NA	4026125	0	0	0	0	NA means under detection limit
403.102	C20 H19 O9	20	19	0	9	0	NA	403.102	NA	NA	NA	0	3785436	0	0	0	NA means under detection limit
403.106	C17 H23 O9 S	17	23	0	9	1	NA	NA	NA	403.106	NA	0	0	0	4724795	0	NA means under detection limit
403.123	C17 H23 O11	17	23	0	11	0	NA	NA	NA	403.123	NA	0	0	0	41240640	0	NA means under detection limit
403.139	C21 H23 O8	21	23	0	8	0	NA	NA	NA	403.139	NA	0	0	0	10870854	0	NA means under detection limit
403.139	C21 H23 O8	21	23	0	8	0	NA	NA	403.139	NA	NA	0	0	6235781	0	0	NA means under detection limit
403.139	C21 H23 O8	21	23	0	8	0	403.139	NA	NA	NA	NA	6272791	0	0	0	0	NA means under detection limit
403.139	C21 H23 O8	21	23	0	8	0	NA	403.139	NA	NA	NA	0	5902054	0	0	0	NA means under detection limit
403.16	C18 H27 O10	18	27	0	10	0	NA	NA	NA	403.16	NA	0	0	0	10838093	0	NA means under detection limit
403.175	C22 H27 O7	22	27	0	7	0	403.175	NA	NA	NA	NA	3162912	0	0	0	0	NA means under detection limit
403.175	C22 H27 O7	22	27	0	7	0	NA	403.175	NA	NA	NA	0	2796271	0	0	0	NA means under detection limit
405.082	C19 H17 O10	19	17	0	10	0	NA	NA	405.082	NA	NA	0	0	4222083	0	0	NA means under detection limit
405.082	C19 H17 O10	19	17	0	10	0	405.082	NA	NA	NA	NA	4665598	0	0	0	0	NA means under detection limit
405.082	C19 H17 O10	19	17	0	10	0	NA	405.082	NA	NA	NA	0	3908853	0	0	0	NA means under detection limit
405.082	C19 H17 O10	19	17	0	10	0	NA	NA	NA	405.082	NA	0	0	0	7162589	0	NA means under detection limit
405.103	C16 H21 O12	16	21	0	12	0	NA	NA	NA	405.103	NA	0	0	0	11637476	0	NA means under detection limit
405.118	C20 H21 O9	20	21	0	9	0	NA	NA	NA	405.118	NA	0	0	0	11494121	0	NA means under detection limit
405.118	C20 H21 O9	20	21	0	9	0	NA	NA	405.118	NA	NA	0	0	6383756	0	0	NA means under detection limit
405.118	C20 H21 O9	20	21	0	9	0	405.118	NA	NA	NA	NA	7229703	0	0	0	0	NA means under detection limit
405.118	C20 H21 O9	20	21	0	9	0	NA	405.118	NA	NA	NA	0	7420159	0	0	0	NA means under detection limit
405.154	C21 H25 O8	21	25	0	8	0	NA	NA	NA	405.154	NA	0	0	0	5548790	0	NA means under detection limit
405.154	C21 H25 O8	21	25	0	8	0	NA	NA	405.154	NA	NA	0	0	4994198	0	0	NA means under detection limit
405.154	C21 H25 O8	21	25	0	8	0	405.154	NA	NA	NA	NA	5129488	0	0	0	0	NA means under detection limit
405.154	C21 H25 O8	21	25	0	8	0	NA	405.154	NA	NA	NA	0	5195017	0	0	0	NA means under detection limit
405.191	C22 H29 O7	22	29	0	7	0	NA	NA	405.191	NA	NA	0	0	2887839	0	0	NA means under detection limit
406.117	C16 H24 N O9 S	16	24	1	9	1	NA	NA	NA	406.117	NA	0	0	0	3664955	0	NA means under detection limit
407.061	C18 H15 O11	18	15	0	11	0	NA	NA	407.061	NA	NA	0	0	3723906	0	0	NA means under detection limit
407.061	C18 H15 O11	18	15	0	11	0	407.061	NA	NA	NA	NA	4707044	0	0	0	0	NA means under detection limit
407.061	C18 H15 O11	18	15	0	11	0	NA	407.061	NA	NA	NA	0	3246858	0	0	0	NA means under detection limit
407.061	C18 H15 O11	18	15	0	11	0	NA	NA	NA	407.061	NA	0	0	0	9241976	0	NA means under detection limit
407.097	C19 H19 O10	19	19	0	10	0	NA	NA	407.097	NA	NA	0	0	9900684	0	0	NA means under detection limit
407.097	C19 H19 O10	19	19	0	10	0	407.097	NA	NA	NA	NA	10349293	0	0	0	0	NA means under detection limit
407.097	C19 H19 O10	19	19	0	10	0	NA	407.097	NA	NA	NA	0	9124627	0	0	0	NA means under detection limit
407.097	C19 H19 O10	19	19	0	10	0	NA	NA	NA	407.097	NA	0	0	0	26094980	0	NA means under detection limit
407.134	C20 H23 O9	20	23	0	9	0	NA	NA	NA	407.134	NA	0	0	0	21388688	0	NA means under detection limit
407.134	C20 H23 O9	20	23	0	9	0	NA	NA	407.134	NA	NA	0	0	8585877	0	0	NA means under detection limit
407.134	C20 H23 O9	20	23	0	9	0	407.134	NA	NA	NA	NA	9030390	0	0	0	0	NA means under detection limit
407.134	C20 H23 O9	20	23	0	9	0	NA	407.134	NA	NA	NA	0	7942941	0	0	0	NA means under detection limit
407.17	C21 H27 O8	21	27	0	8	0	NA	NA	NA	407.17	NA	0	0	0	6655389	0	NA means under detection limit
407.17	C21 H27 O8	21	27	0	8	0	NA	NA	407.17	NA	NA	0	0	3893918	0	0	NA means under detection limit
407.17	C21 H27 O8	21	27	0	8	0	407.17	NA	NA	NA	NA	4581119	0	0	0	0	NA means under detection limit
407.17	C21 H27 O8	21	27	0	8	0	NA	407.17	NA	NA	NA	0	4250407	0	0	0	NA means under detection limit
407.352	C26 H47 O3	26	47	0	3	0	NA	NA	NA	NA	407.352	0	0	0	0	2577752	NA means under detection limit
408.132	C16 H26 N O9 S	16	26	1	9	1	NA	NA	NA	408.132	NA	0	0	0	8371935	0	NA means under detection limit
409.077	C18 H17 O11	18	17	0	11	0	NA	NA	409.076	NA	NA	0	0	9952388	0	0	NA means under detection limit
409.077	C18 H17 O11	18	17	0	11	0	409.077	NA	NA	NA	NA	12086473	0	0	0	0	NA means under detection limit
409.077	C18 H17 O11	18	17	0	11	0	NA	409.077	NA	NA	NA	0	8940835	0	0	0	NA means under detection limit
409.077	C18 H17 O11	18	17	0	11	0	NA	NA	NA	409.077	NA	0	0	0	33828888	0	NA means under detection limit
409.113	C19 H21 O10	19	21	0	10	0	NA	NA	409.113	NA	NA	0	0	14494861	0	0	NA means under detection limit
409.113	C19 H21 O10	19	21	0	10	0	409.113	NA	NA	NA	NA	16772306	0	0	0	0	NA means under detection limit
409.113	C19 H21 O10	19	21	0	10	0	NA	409.113	NA	NA	NA	0	14607661	0	0	0	NA means under detection limit
409.113	C19 H21 O10	19	21	0	10	0	NA	NA	NA	409.113	NA	0	0	0	56414244	0	NA means under detection limit
409.116	C16 H25 O10 S	16	25	0	10	1	NA	NA	NA	409.116	NA	0	0	0	52203556	0	NA means under detection limit
409.149	C20 H25 O9	20	25	0	9	0	NA	NA	NA	409.149	NA	0	0	0	26177584	0	NA means under detection limit
409.149	C20 H25 O9	20	25	0	9	0	NA	NA	409.149	NA	NA	0	0	6263958	0	0	NA means under detection limit
409.149	C20 H25 O9	20	25	0	9	0	409.149	NA	NA	NA	NA	6259930	0	0	0	0	NA means under detection limit
409.149	C20 H25 O9	20	25	0	9	0	NA	409.149	NA	NA	NA	0	6937911	0	0	0	NA means under detection limit
410.112	C15 H24 N O10 S	15	24	1	10	1	NA	NA	NA	410.112	NA	0	0	0	6637934	0	NA means under detection limit
410.148	C16 H28 N O9 S	16	28	1	9	1	NA	NA	NA	410.148	NA	0	0	0	18690426	0	NA means under detection limit
410.275	C19 H40 N O8	19	40	1	8	0	NA	NA	NA	410.275	NA	0	0	0	7227812	0	NA means under detection limit
411.056	C17 H15 O12	17	15	0	12	0	NA	NA	411.056	NA	NA	0	0	3111540	0	0	NA means under detection limit
411.056	C17 H15 O12	17	15	0	12	0	411.056	NA	NA	NA	NA	3909276	0	0	0	0	NA means under detection limit
411.056	C17 H15 O12	17	15	0	12	0	NA	411.056	NA	NA	NA	0	2728751	0	0	0	NA means under detection limit
411.056	C17 H15 O12	17	15	0	12	0	NA	NA	NA	411.056	NA	0	0	0	15209124	0	NA means under detection limit
411.092	C18 H19 O11	18	19	0	11	0	NA	NA	411.092	NA	NA	0	0	16289405	0	0	NA means under detection limit
411.092	C18 H19 O11	18	19	0	11	0	411.092	NA	NA	NA	NA	25603748	0	0	0	0	NA means under detection limit
411.092	C18 H19 O11	18	19	0	11	0	NA	411.092	NA	NA	NA	0	17721144	0	0	0	NA means under detection limit
411.092	C18 H19 O11	18	19	0	11	0	NA	NA	NA	411.092	NA	0	0	0	370872992	0	NA means under detection limit
411.129	C19 H23 O10	19	23	0	10	0	NA	NA	411.129	NA	NA	0	0	16215686	0	0	NA means under detection limit
411.129	C19 H23 O10	19	23	0	10	0	411.129	NA	NA	NA	NA	19029676	0	0	0	0	NA means under detection limit
411.129	C19 H23 O10	19	23	0	10	0	NA	411.129	NA	NA	NA	0	14849858	0	0	0	NA means under detection limit
411.129	C19 H23 O10	19	23	0	10	0	NA	NA	NA	411.129	NA	0	0	0	85660344	0	NA means under detection limit
411.165	C20 H27 O9	20	27	0	9	0	NA	NA	NA	411.165	NA	0	0	0	17068744	0	NA means under detection limit
411.165	C20 H27 O9	20	27	0	9	0	NA	NA	411.165	NA	NA	0	0	4571792	0	0	NA means under detection limit
411.165	C20 H27 O9	20	27	0	9	0	411.165	NA	NA	NA	NA	5077685	0	0	0	0	NA means under detection limit
411.165	C20 H27 O9	20	27	0	9	0	NA	411.165	NA	NA	NA	0	3956555	0	0	0	NA means under detection limit
411.18	C24 H27 O6	24	27	0	6	0	NA	NA	411.18	NA	NA	0	0	3506835	0	0	NA means under detection limit
411.18	C24 H27 O6	24	27	0	6	0	411.18	NA	NA	NA	NA	3115705	0	0	0	0	NA means under detection limit
411.362	C29 H47 O	29	47	0	1	0	NA	NA	NA	NA	411.362	0	0	0	0	3529409	NA means under detection limit
411.362	C29 H47 O	29	47	0	1	0	NA	NA	NA	NA	411.362	0	0	0	0	3074787	NA means under detection limit
411.362	C29 H47 O	29	47	0	1	0	NA	NA	NA	NA	411.362	0	0	0	0	3196799	NA means under detection limit
411.362	C29 H47 O	29	47	0	1	0	NA	NA	NA	NA	411.362	0	0	0	0	3302152	NA means under detection limit
411.383	C26 H51 O3	26	51	0	3	0	NA	NA	NA	NA	411.383	0	0	0	0	2680709	NA means under detection limit
412.127	C15 H26 N O10 S	15	26	1	10	1	NA	NA	NA	412.127	NA	0	0	0	36508672	0	NA means under detection limit
412.379	C25 H50 N O3	25	50	1	3	0	NA	NA	NA	412.379	NA	0	0	0	4206675	0	NA means under detection limit
413.071	C17 H17 O12	17	17	0	12	0	NA	NA	413.071	NA	NA	0	0	4913255	0	0	NA means under detection limit
413.071	C17 H17 O12	17	17	0	12	0	413.072	NA	NA	NA	NA	7213166	0	0	0	0	NA means under detection limit
413.071	C17 H17 O12	17	17	0	12	0	NA	413.071	NA	NA	NA	0	4538687	0	0	0	NA means under detection limit
413.071	C17 H17 O12	17	17	0	12	0	NA	NA	NA	413.071	NA	0	0	0	53269812	0	NA means under detection limit
413.108	C18 H21 O11	18	21	0	11	0	NA	NA	413.108	NA	NA	0	0	12402800	0	0	NA means under detection limit
413.108	C18 H21 O11	18	21	0	11	0	413.108	NA	NA	NA	NA	13844598	0	0	0	0	NA means under detection limit
413.108	C18 H21 O11	18	21	0	11	0	NA	413.108	NA	NA	NA	0	11671880	0	0	0	NA means under detection limit
413.108	C18 H21 O11	18	21	0	11	0	NA	NA	NA	413.108	NA	0	0	0	109843776	0	NA means under detection limit
413.144	C19 H25 O10	19	25	0	10	0	NA	NA	413.144	NA	NA	0	0	18972792	0	0	NA means under detection limit
413.144	C19 H25 O10	19	25	0	10	0	413.144	NA	NA	NA	NA	21647486	0	0	0	0	NA means under detection limit
413.144	C19 H25 O10	19	25	0	10	0	NA	413.144	NA	NA	NA	0	19192146	0	0	0	NA means under detection limit
413.144	C19 H25 O10	19	25	0	10	0	NA	NA	NA	413.144	NA	0	0	0	115414344	0	NA means under detection limit
413.159	C23 H25 O7	23	25	0	7	0	NA	NA	413.159	NA	NA	0	0	2849916	0	0	NA means under detection limit
413.159	C23 H25 O7	23	25	0	7	0	413.159	NA	NA	NA	NA	3540098	0	0	0	0	NA means under detection limit
413.159	C23 H25 O7	23	25	0	7	0	NA	413.16	NA	NA	NA	0	3308886	0	0	0	NA means under detection limit
413.181	C20 H29 O9	20	29	0	9	0	NA	NA	NA	413.181	NA	0	0	0	31872342	0	NA means under detection limit
413.181	C20 H29 O9	20	29	0	9	0	NA	NA	413.181	NA	NA	0	0	5373058	0	0	NA means under detection limit
413.181	C20 H29 O9	20	29	0	9	0	413.181	NA	NA	NA	NA	5460103	0	0	0	0	NA means under detection limit
413.181	C20 H29 O9	20	29	0	9	0	NA	413.181	NA	NA	NA	0	5060955	0	0	0	NA means under detection limit
413.196	C24 H29 O6	24	29	0	6	0	NA	NA	413.196	NA	NA	0	0	3871877	0	0	NA means under detection limit
413.196	C24 H29 O6	24	29	0	6	0	413.196	NA	NA	NA	NA	5607562	0	0	0	0	NA means under detection limit
413.308	C24 H45 O3 S	24	45	0	3	1	NA	NA	NA	NA	413.308	0	0	0	0	3726497	NA means under detection limit
413.308	C24 H45 O3 S	24	45	0	3	1	NA	NA	NA	NA	413.308	0	0	0	0	4838564	NA means under detection limit
413.308	C24 H45 O3 S	24	45	0	3	1	NA	NA	NA	NA	413.308	0	0	0	0	3774844	NA means under detection limit
413.308	C24 H45 O3 S	24	45	0	3	1	NA	NA	NA	NA	413.308	0	0	0	0	6475136	NA means under detection limit
413.363	C25 H49 O4	25	49	0	4	0	NA	NA	NA	NA	413.363	0	0	0	0	2726062	NA means under detection limit
413.363	C25 H49 O4	25	49	0	4	0	NA	NA	NA	NA	413.363	0	0	0	0	2617520	NA means under detection limit
413.363	C25 H49 O4	25	49	0	4	0	NA	NA	NA	NA	413.362	0	0	0	0	2731914	NA means under detection limit
413.378	C29 H49 O	29	49	0	1	0	NA	NA	NA	NA	413.378	0	0	0	0	3532980	NA means under detection limit
413.378	C29 H49 O	29	49	0	1	0	NA	NA	NA	NA	413.378	0	0	0	0	3188110	NA means under detection limit
414.358	C24 H48 N O4	24	48	1	4	0	NA	NA	NA	414.358	NA	0	0	0	5748434	0	NA means under detection limit
414.394	C25 H52 N O3	25	52	1	3	0	NA	NA	NA	414.394	NA	0	0	0	3619550	0	NA means under detection limit
415.051	C16 H15 O13	16	15	0	13	0	NA	NA	NA	415.051	NA	0	0	0	8814512	0	NA means under detection limit
415.087	C17 H19 O12	17	19	0	12	0	NA	NA	415.087	NA	NA	0	0	2964050	0	0	NA means under detection limit
415.087	C17 H19 O12	17	19	0	12	0	415.087	NA	NA	NA	NA	3635767	0	0	0	0	NA means under detection limit
415.087	C17 H19 O12	17	19	0	12	0	NA	NA	NA	415.087	NA	0	0	0	30365628	0	NA means under detection limit
415.102	C21 H19 O9	21	19	0	9	0	NA	NA	415.102	NA	NA	0	0	2606678	0	0	NA means under detection limit
415.102	C21 H19 O9	21	19	0	9	0	415.102	NA	NA	NA	NA	2899003	0	0	0	0	NA means under detection limit
415.102	C21 H19 O9	21	19	0	9	0	NA	415.102	NA	NA	NA	0	2926414	0	0	0	NA means under detection limit
415.123	C18 H23 O11	18	23	0	11	0	NA	NA	415.123	NA	NA	0	0	10322523	0	0	NA means under detection limit
415.123	C18 H23 O11	18	23	0	11	0	415.123	NA	NA	NA	NA	13320767	0	0	0	0	NA means under detection limit
415.123	C18 H23 O11	18	23	0	11	0	NA	415.123	NA	NA	NA	0	9737043	0	0	0	NA means under detection limit
415.123	C18 H23 O11	18	23	0	11	0	NA	NA	NA	415.123	NA	0	0	0	118462408	0	NA means under detection limit
415.139	C22 H23 O8	22	23	0	8	0	NA	NA	415.139	NA	NA	0	0	3945055	0	0	NA means under detection limit
415.139	C22 H23 O8	22	23	0	8	0	415.139	NA	NA	NA	NA	3921475	0	0	0	0	NA means under detection limit
415.139	C22 H23 O8	22	23	0	8	0	NA	415.139	NA	NA	NA	0	4384599	0	0	0	NA means under detection limit
415.151	C15 H29 N O10 S	15	29	1	10	1	NA	NA	NA	415.151	NA	0	0	0	2662864	0	NA means under detection limit
415.16	C19 H27 O10	19	27	0	10	0	NA	NA	NA	415.16	NA	0	0	0	22108114	0	NA means under detection limit
415.175	C23 H27 O7	23	27	0	7	0	NA	NA	415.175	NA	NA	0	0	3228263	0	0	NA means under detection limit
415.175	C23 H27 O7	23	27	0	7	0	415.175	NA	NA	NA	NA	3018827	0	0	0	0	NA means under detection limit
415.212	C24 H31 O6	24	31	0	6	0	415.212	NA	NA	NA	NA	3223123	0	0	0	0	NA means under detection limit
415.233	C21 H35 O8	21	35	0	8	0	NA	NA	415.233	NA	NA	0	0	12030581	0	0	NA means under detection limit
415.233	C21 H35 O8	21	35	0	8	0	415.233	NA	NA	NA	NA	28906072	0	0	0	0	NA means under detection limit
415.233	C21 H35 O8	21	35	0	8	0	NA	415.233	NA	NA	NA	0	15666031	0	0	0	NA means under detection limit
415.254	C25 H37 N O2 S	25	37	1	2	1	NA	NA	NA	415.254	NA	0	0	0	22960112	0	NA means under detection limit
416.373	C24 H50 N O4	24	50	1	4	0	NA	NA	NA	416.373	NA	0	0	0	15415637	0	NA means under detection limit
416.41	C25 H54 N O3	25	54	1	3	0	NA	NA	NA	416.41	NA	0	0	0	2926945	0	NA means under detection limit
417.033	C12 H17 O14 S	12	17	0	14	1	NA	NA	NA	NA	417.034	0	0	0	0	2644006	NA means under detection limit
417.066	C16 H17 O13	16	17	0	13	0	NA	NA	NA	417.066	NA	0	0	0	3396145	0	NA means under detection limit
417.082	C20 H17 O10	20	17	0	10	0	NA	NA	417.082	NA	NA	0	0	3212337	0	0	NA means under detection limit
417.082	C20 H17 O10	20	17	0	10	0	417.082	NA	NA	NA	NA	3897332	0	0	0	0	NA means under detection limit
417.082	C20 H17 O10	20	17	0	10	0	NA	417.082	NA	NA	NA	0	2794827	0	0	0	NA means under detection limit
417.082	C20 H17 O10	20	17	0	10	0	NA	NA	NA	417.082	NA	0	0	0	3534389	0	NA means under detection limit
417.085	C17 H21 O10 S	17	21	0	10	1	NA	NA	NA	417.085	NA	0	0	0	3574326	0	NA means under detection limit
417.103	C17 H21 O12	17	21	0	12	0	NA	NA	NA	417.103	NA	0	0	0	77552184	0	NA means under detection limit
417.118	C21 H21 O9	21	21	0	9	0	NA	NA	NA	417.118	NA	0	0	0	6433345	0	NA means under detection limit
417.118	C21 H21 O9	21	21	0	9	0	NA	NA	417.118	NA	NA	0	0	5931066	0	0	NA means under detection limit
417.118	C21 H21 O9	21	21	0	9	0	417.118	NA	NA	NA	NA	5615612	0	0	0	0	NA means under detection limit
417.118	C21 H21 O9	21	21	0	9	0	NA	417.118	NA	NA	NA	0	4976980	0	0	0	NA means under detection limit
417.139	C18 H25 O11	18	25	0	11	0	NA	NA	417.139	NA	NA	0	0	3104831	0	0	NA means under detection limit
417.139	C18 H25 O11	18	25	0	11	0	417.139	NA	NA	NA	NA	4147201	0	0	0	0	NA means under detection limit
417.139	C18 H25 O11	18	25	0	11	0	NA	417.139	NA	NA	NA	0	3499353	0	0	0	NA means under detection limit
417.139	C18 H25 O11	18	25	0	11	0	NA	NA	NA	417.139	NA	0	0	0	104438344	0	NA means under detection limit
417.154	C22 H25 O8	22	25	0	8	0	NA	NA	NA	417.154	NA	0	0	0	5398093	0	NA means under detection limit
417.154	C22 H25 O8	22	25	0	8	0	NA	NA	417.154	NA	NA	0	0	5368899	0	0	NA means under detection limit
417.154	C22 H25 O8	22	25	0	8	0	417.154	NA	NA	NA	NA	5083140	0	0	0	0	NA means under detection limit
417.154	C22 H25 O8	22	25	0	8	0	NA	417.154	NA	NA	NA	0	4720990	0	0	0	NA means under detection limit
417.176	C19 H29 O10	19	29	0	10	0	NA	NA	NA	417.176	NA	0	0	0	13695571	0	NA means under detection limit
417.191	C23 H29 O7	23	29	0	7	0	NA	NA	417.191	NA	NA	0	0	2823243	0	0	NA means under detection limit
418.389	C24 H52 N O4	24	52	1	4	0	NA	NA	NA	418.389	NA	0	0	0	14506961	0	NA means under detection limit
419.061	C19 H15 O11	19	15	0	11	0	419.061	NA	NA	NA	NA	4389286	0	0	0	0	NA means under detection limit
419.061	C19 H15 O11	19	15	0	11	0	NA	419.061	NA	NA	NA	0	2913603	0	0	0	NA means under detection limit
419.061	C19 H15 O11	19	15	0	11	0	NA	NA	NA	419.061	NA	0	0	0	3038883	0	NA means under detection limit
419.082	C16 H19 O13	16	19	0	13	0	NA	NA	NA	419.082	NA	0	0	0	3908778	0	NA means under detection limit
419.097	C20 H19 O10	20	19	0	10	0	NA	NA	419.097	NA	NA	0	0	5731855	0	0	NA means under detection limit
419.097	C20 H19 O10	20	19	0	10	0	419.097	NA	NA	NA	NA	7372206	0	0	0	0	NA means under detection limit
419.097	C20 H19 O10	20	19	0	10	0	NA	419.097	NA	NA	NA	0	6301517	0	0	0	NA means under detection limit
419.097	C20 H19 O10	20	19	0	10	0	NA	NA	NA	419.097	NA	0	0	0	12868783	0	NA means under detection limit
419.118	C17 H23 O12	17	23	0	12	0	NA	NA	NA	419.118	NA	0	0	0	11377845	0	NA means under detection limit
419.134	C21 H23 O9	21	23	0	9	0	NA	NA	NA	419.134	NA	0	0	0	12131514	0	NA means under detection limit
419.134	C21 H23 O9	21	23	0	9	0	NA	NA	419.134	NA	NA	0	0	8117783	0	0	NA means under detection limit
419.134	C21 H23 O9	21	23	0	9	0	419.134	NA	NA	NA	NA	7925174	0	0	0	0	NA means under detection limit
419.134	C21 H23 O9	21	23	0	9	0	NA	419.134	NA	NA	NA	0	6334294	0	0	0	NA means under detection limit
419.17	C22 H27 O8	22	27	0	8	0	NA	NA	419.17	NA	NA	0	0	4196896	0	0	NA means under detection limit
419.17	C22 H27 O8	22	27	0	8	0	419.17	NA	NA	NA	NA	4236734	0	0	0	0	NA means under detection limit
419.17	C22 H27 O8	22	27	0	8	0	NA	419.17	NA	NA	NA	0	3626847	0	0	0	NA means under detection limit
419.206	C23 H31 O7	23	31	0	7	0	NA	NA	419.207	NA	NA	0	0	2748968	0	0	NA means under detection limit
419.316	C26 H43 O4	26	43	0	4	0	NA	NA	NA	NA	419.316	0	0	0	0	6258242	NA means under detection limit
419.316	C26 H43 O4	26	43	0	4	0	NA	NA	NA	NA	419.316	0	0	0	0	6565342	NA means under detection limit
419.316	C26 H43 O4	26	43	0	4	0	NA	NA	NA	NA	419.316	0	0	0	0	5813124	NA means under detection limit
419.316	C26 H43 O4	26	43	0	4	0	NA	NA	NA	NA	419.316	0	0	0	0	8789235	NA means under detection limit
420.132	C17 H26 N O9 S	17	26	1	9	1	NA	NA	NA	420.132	NA	0	0	0	4204017	0	NA means under detection limit
421.077	C19 H17 O11	19	17	0	11	0	NA	NA	421.077	NA	NA	0	0	6533085	0	0	NA means under detection limit
421.077	C19 H17 O11	19	17	0	11	0	421.077	NA	NA	NA	NA	8081242	0	0	0	0	NA means under detection limit
421.077	C19 H17 O11	19	17	0	11	0	NA	421.077	NA	NA	NA	0	7268672	0	0	0	NA means under detection limit
421.077	C19 H17 O11	19	17	0	11	0	NA	NA	NA	421.077	NA	0	0	0	17399574	0	NA means under detection limit
421.113	C20 H21 O10	20	21	0	10	0	NA	NA	421.113	NA	NA	0	0	10520549	0	0	NA means under detection limit
421.113	C20 H21 O10	20	21	0	10	0	421.113	NA	NA	NA	NA	10688354	0	0	0	0	NA means under detection limit
421.113	C20 H21 O10	20	21	0	10	0	NA	421.113	NA	NA	NA	0	9238857	0	0	0	NA means under detection limit
421.113	C20 H21 O10	20	21	0	10	0	NA	NA	NA	421.113	NA	0	0	0	24297248	0	NA means under detection limit
421.116	C17 H25 O10 S	17	25	0	10	1	NA	NA	NA	421.116	NA	0	0	0	15220514	0	NA means under detection limit
421.149	C21 H25 O9	21	25	0	9	0	NA	NA	NA	421.149	NA	0	0	0	20541228	0	NA means under detection limit
421.149	C21 H25 O9	21	25	0	9	0	NA	NA	421.149	NA	NA	0	0	7706606	0	0	NA means under detection limit
421.149	C21 H25 O9	21	25	0	9	0	421.149	NA	NA	NA	NA	8298346	0	0	0	0	NA means under detection limit
421.149	C21 H25 O9	21	25	0	9	0	NA	421.149	NA	NA	NA	0	7536979	0	0	0	NA means under detection limit
422.148	C17 H28 N O9 S	17	28	1	9	1	NA	NA	NA	422.148	NA	0	0	0	34504800	0	NA means under detection limit
423.056	C18 H15 O12	18	15	0	12	0	NA	NA	NA	423.056	NA	0	0	0	8935797	0	NA means under detection limit
423.092	C19 H19 O11	19	19	0	11	0	NA	NA	423.092	NA	NA	0	0	14485933	0	0	NA means under detection limit
423.092	C19 H19 O11	19	19	0	11	0	423.092	NA	NA	NA	NA	15599879	0	0	0	0	NA means under detection limit
423.092	C19 H19 O11	19	19	0	11	0	NA	423.092	NA	NA	NA	0	11313977	0	0	0	NA means under detection limit
423.092	C19 H19 O11	19	19	0	11	0	NA	NA	NA	423.092	NA	0	0	0	37265792	0	NA means under detection limit
423.129	C20 H23 O10	20	23	0	10	0	NA	NA	423.129	NA	NA	0	0	10414517	0	0	NA means under detection limit
423.129	C20 H23 O10	20	23	0	10	0	423.129	NA	NA	NA	NA	11229455	0	0	0	0	NA means under detection limit
423.129	C20 H23 O10	20	23	0	10	0	NA	423.129	NA	NA	NA	0	9823042	0	0	0	NA means under detection limit
423.129	C20 H23 O10	20	23	0	10	0	NA	NA	NA	423.129	NA	0	0	0	38732172	0	NA means under detection limit
423.165	C21 H27 O9	21	27	0	9	0	NA	NA	NA	423.165	NA	0	0	0	14774679	0	NA means under detection limit
423.165	C21 H27 O9	21	27	0	9	0	NA	NA	423.165	NA	NA	0	0	3578302	0	0	NA means under detection limit
423.165	C21 H27 O9	21	27	0	9	0	423.165	NA	NA	NA	NA	3804439	0	0	0	0	NA means under detection limit
423.165	C21 H27 O9	21	27	0	9	0	NA	423.165	NA	NA	NA	0	3320651	0	0	0	NA means under detection limit
424.127	C16 H26 N O10 S	16	26	1	10	1	NA	NA	NA	424.127	NA	0	0	0	13046460	0	NA means under detection limit
424.164	C17 H30 N O9 S	17	30	1	9	1	NA	NA	NA	424.164	NA	0	0	0	6247111	0	NA means under detection limit
425.071	C18 H17 O12	18	17	0	12	0	NA	NA	425.071	NA	NA	0	0	5509999	0	0	NA means under detection limit
425.071	C18 H17 O12	18	17	0	12	0	425.071	NA	NA	NA	NA	9704103	0	0	0	0	NA means under detection limit
425.071	C18 H17 O12	18	17	0	12	0	NA	425.071	NA	NA	NA	0	5339428	0	0	0	NA means under detection limit
425.071	C18 H17 O12	18	17	0	12	0	NA	NA	NA	425.071	NA	0	0	0	32318426	0	NA means under detection limit
425.102	C26 H17 O6	26	17	0	6	0	NA	NA	NA	425.102	NA	0	0	0	3251683	0	NA means under detection limit
425.108	C19 H21 O11	19	21	0	11	0	NA	NA	425.108	NA	NA	0	0	14973815	0	0	NA means under detection limit
425.108	C19 H21 O11	19	21	0	11	0	425.108	NA	NA	NA	NA	19511984	0	0	0	0	NA means under detection limit
425.108	C19 H21 O11	19	21	0	11	0	NA	425.108	NA	NA	NA	0	14980397	0	0	0	NA means under detection limit
425.108	C19 H21 O11	19	21	0	11	0	NA	NA	NA	425.108	NA	0	0	0	140878816	0	NA means under detection limit
425.144	C20 H25 O10	20	25	0	10	0	NA	NA	425.144	NA	NA	0	0	11041663	0	0	NA means under detection limit
425.144	C20 H25 O10	20	25	0	10	0	425.144	NA	NA	NA	NA	11315895	0	0	0	0	NA means under detection limit
425.144	C20 H25 O10	20	25	0	10	0	NA	425.144	NA	NA	NA	0	10831157	0	0	0	NA means under detection limit
425.144	C20 H25 O10	20	25	0	10	0	NA	NA	NA	425.144	NA	0	0	0	44680176	0	NA means under detection limit
425.181	C21 H29 O9	21	29	0	9	0	NA	NA	NA	425.181	NA	0	0	0	7807995	0	NA means under detection limit
425.326	C25 H45 O5	25	45	0	5	0	NA	NA	NA	NA	425.326	0	0	0	0	2638691	NA means under detection limit
425.363	C26 H49 O4	26	49	0	4	0	NA	NA	NA	NA	425.363	0	0	0	0	2847460	NA means under detection limit
426.143	C16 H28 N O10 S	16	28	1	10	1	NA	NA	NA	426.143	NA	0	0	0	38978844	0	NA means under detection limit
427.081	C25 H15 O7	25	15	0	7	0	NA	NA	NA	427.081	NA	0	0	0	2713142	0	NA means under detection limit
427.087	C18 H19 O12	18	19	0	12	0	NA	NA	427.087	NA	NA	0	0	8420659	0	0	NA means under detection limit
427.087	C18 H19 O12	18	19	0	12	0	427.087	NA	NA	NA	NA	11435082	0	0	0	0	NA means under detection limit
427.087	C18 H19 O12	18	19	0	12	0	NA	427.087	NA	NA	NA	0	8185619	0	0	0	NA means under detection limit
427.087	C18 H19 O12	18	19	0	12	0	NA	NA	NA	427.087	NA	0	0	0	100247096	0	NA means under detection limit
427.114	C15 H25 N O11 S	15	25	1	11	1	NA	NA	NA	427.114	NA	0	0	0	3008576	0	NA means under detection limit
427.123	C19 H23 O11	19	23	0	11	0	NA	NA	427.123	NA	NA	0	0	11042107	0	0	NA means under detection limit
427.123	C19 H23 O11	19	23	0	11	0	427.123	NA	NA	NA	NA	14134354	0	0	0	0	NA means under detection limit
427.123	C19 H23 O11	19	23	0	11	0	NA	427.123	NA	NA	NA	0	10983196	0	0	0	NA means under detection limit
427.123	C19 H23 O11	19	23	0	11	0	NA	NA	NA	427.123	NA	0	0	0	88155712	0	NA means under detection limit
427.127	C16 H27 O11 S	16	27	0	11	1	NA	NA	NA	427.127	NA	0	0	0	11750980	0	NA means under detection limit
427.16	C20 H27 O10	20	27	0	10	0	NA	NA	427.16	NA	NA	0	0	9168195	0	0	NA means under detection limit
427.16	C20 H27 O10	20	27	0	10	0	427.16	NA	NA	NA	NA	10810457	0	0	0	0	NA means under detection limit
427.16	C20 H27 O10	20	27	0	10	0	NA	427.16	NA	NA	NA	0	9096997	0	0	0	NA means under detection limit
427.16	C20 H27 O10	20	27	0	10	0	NA	NA	NA	427.16	NA	0	0	0	55174732	0	NA means under detection limit
427.175	C24 H27 O7	24	27	0	7	0	427.175	NA	NA	NA	NA	3041373	0	0	0	0	NA means under detection limit
428.373	C25 H50 N O4	25	50	1	4	0	NA	NA	NA	428.373	NA	0	0	0	4082615	0	NA means under detection limit
429.066	C17 H17 O13	17	17	0	13	0	429.066	NA	NA	NA	NA	3106274	0	0	0	0	NA means under detection limit
429.066	C17 H17 O13	17	17	0	13	0	NA	NA	NA	429.066	NA	0	0	0	34367620	0	NA means under detection limit
429.103	C18 H21 O12	18	21	0	12	0	NA	NA	429.103	NA	NA	0	0	4244209	0	0	NA means under detection limit
429.103	C18 H21 O12	18	21	0	12	0	429.103	NA	NA	NA	NA	7413225	0	0	0	0	NA means under detection limit
429.103	C18 H21 O12	18	21	0	12	0	NA	429.103	NA	NA	NA	0	4516094	0	0	0	NA means under detection limit
429.103	C18 H21 O12	18	21	0	12	0	NA	NA	NA	429.103	NA	0	0	0	101755024	0	NA means under detection limit
429.118	C22 H21 O9	22	21	0	9	0	NA	NA	429.118	NA	NA	0	0	2752244	0	0	NA means under detection limit
429.118	C22 H21 O9	22	21	0	9	0	429.118	NA	NA	NA	NA	2694636	0	0	0	0	NA means under detection limit
429.118	C22 H21 O9	22	21	0	9	0	NA	429.118	NA	NA	NA	0	2781441	0	0	0	NA means under detection limit
429.139	C19 H25 O11	19	25	0	11	0	NA	NA	429.139	NA	NA	0	0	6504185	0	0	NA means under detection limit
429.139	C19 H25 O11	19	25	0	11	0	429.139	NA	NA	NA	NA	8232433	0	0	0	0	NA means under detection limit
429.139	C19 H25 O11	19	25	0	11	0	NA	429.139	NA	NA	NA	0	7772423	0	0	0	NA means under detection limit
429.139	C19 H25 O11	19	25	0	11	0	NA	NA	NA	429.139	NA	0	0	0	84027544	0	NA means under detection limit
429.154	C23 H25 O8	23	25	0	8	0	NA	NA	429.154	NA	NA	0	0	3271420	0	0	NA means under detection limit
429.154	C23 H25 O8	23	25	0	8	0	429.154	NA	NA	NA	NA	4200948	0	0	0	0	NA means under detection limit
429.154	C23 H25 O8	23	25	0	8	0	NA	429.154	NA	NA	NA	0	2597642	0	0	0	NA means under detection limit
429.176	C20 H29 O10	20	29	0	10	0	NA	NA	NA	429.176	NA	0	0	0	12212389	0	NA means under detection limit
429.191	C24 H29 O7	24	29	0	7	0	NA	NA	NA	NA	429.191	0	0	0	0	7261957	NA means under detection limit
429.191	C24 H29 O7	24	29	0	7	0	NA	NA	NA	NA	429.191	0	0	0	0	9268731	NA means under detection limit
429.191	C24 H29 O7	24	29	0	7	0	NA	NA	NA	NA	429.191	0	0	0	0	3333395	NA means under detection limit
429.248	C22 H37 O8	22	37	0	8	0	NA	NA	429.248	NA	NA	0	0	6393617	0	0	NA means under detection limit
429.248	C22 H37 O8	22	37	0	8	0	429.248	NA	NA	NA	NA	19136006	0	0	0	0	NA means under detection limit
429.248	C22 H37 O8	22	37	0	8	0	NA	429.248	NA	NA	NA	0	11675937	0	0	0	NA means under detection limit
429.319	C28 H45 O S	28	45	0	1	1	NA	NA	429.319	NA	NA	0	0	4015905	0	0	NA means under detection limit
429.319	C28 H45 O S	28	45	0	1	1	429.319	NA	NA	NA	NA	2755093	0	0	0	0	NA means under detection limit
429.319	C28 H45 O S	28	45	0	1	1	NA	429.319	NA	NA	NA	0	3220786	0	0	0	NA means under detection limit
430.389	C25 H52 N O4	25	52	1	4	0	NA	NA	NA	430.389	NA	0	0	0	7993867	0	NA means under detection limit
431.082	C17 H19 O13	17	19	0	13	0	NA	NA	NA	431.082	NA	0	0	0	14490326	0	NA means under detection limit
431.097	C21 H19 O10	21	19	0	10	0	NA	NA	431.097	NA	NA	0	0	2727077	0	0	NA means under detection limit
431.097	C21 H19 O10	21	19	0	10	0	431.097	NA	NA	NA	NA	4506496	0	0	0	0	NA means under detection limit
431.097	C21 H19 O10	21	19	0	10	0	NA	431.097	NA	NA	NA	0	2838751	0	0	0	NA means under detection limit
431.097	C21 H19 O10	21	19	0	10	0	NA	NA	NA	431.097	NA	0	0	0	5042907	0	NA means under detection limit
431.118	C18 H23 O12	18	23	0	12	0	NA	NA	NA	431.118	NA	0	0	0	67660512	0	NA means under detection limit
431.134	C22 H23 O9	22	23	0	9	0	NA	NA	431.134	NA	NA	0	0	3419309	0	0	NA means under detection limit
431.134	C22 H23 O9	22	23	0	9	0	431.134	NA	NA	NA	NA	3944327	0	0	0	0	NA means under detection limit
431.134	C22 H23 O9	22	23	0	9	0	NA	431.134	NA	NA	NA	0	3440360	0	0	0	NA means under detection limit
431.134	C22 H23 O9	22	23	0	9	0	NA	NA	NA	431.134	NA	0	0	0	6111973	0	NA means under detection limit
431.155	C19 H27 O11	19	27	0	11	0	NA	NA	431.155	NA	NA	0	0	4065457	0	0	NA means under detection limit
431.155	C19 H27 O11	19	27	0	11	0	431.155	NA	NA	NA	NA	6166411	0	0	0	0	NA means under detection limit
431.155	C19 H27 O11	19	27	0	11	0	NA	431.155	NA	NA	NA	0	4708077	0	0	0	NA means under detection limit
431.155	C19 H27 O11	19	27	0	11	0	NA	NA	NA	431.155	NA	0	0	0	50277100	0	NA means under detection limit
431.17	C23 H27 O8	23	27	0	8	0	NA	NA	431.17	NA	NA	0	0	3296437	0	0	NA means under detection limit
431.191	C20 H31 O10	20	31	0	10	0	NA	NA	NA	431.191	NA	0	0	0	4170486	0	NA means under detection limit
432.405	C25 H54 N O4	25	54	1	4	0	NA	NA	NA	432.405	NA	0	0	0	3377240	0	NA means under detection limit
433.028	C12 H17 O15 S	12	17	0	15	1	NA	NA	433.028	NA	NA	0	0	2663494	0	0	NA means under detection limit
433.077	C20 H17 O11	20	17	0	11	0	NA	NA	433.077	NA	NA	0	0	2950736	0	0	NA means under detection limit
433.077	C20 H17 O11	20	17	0	11	0	433.077	NA	NA	NA	NA	3850512	0	0	0	0	NA means under detection limit
433.077	C20 H17 O11	20	17	0	11	0	NA	433.077	NA	NA	NA	0	3050680	0	0	0	NA means under detection limit
433.077	C20 H17 O11	20	17	0	11	0	NA	NA	NA	433.077	NA	0	0	0	5190939	0	NA means under detection limit
433.08	C17 H21 O11 S	17	21	0	11	1	NA	NA	NA	433.08	NA	0	0	0	8219932	0	NA means under detection limit
433.113	C21 H21 O10	21	21	0	10	0	NA	NA	433.113	NA	NA	0	0	5380696	0	0	NA means under detection limit
433.113	C21 H21 O10	21	21	0	10	0	433.113	NA	NA	NA	NA	6025496	0	0	0	0	NA means under detection limit
433.113	C21 H21 O10	21	21	0	10	0	NA	433.113	NA	NA	NA	0	5440705	0	0	0	NA means under detection limit
433.113	C21 H21 O10	21	21	0	10	0	NA	NA	NA	433.113	NA	0	0	0	10833190	0	NA means under detection limit
433.116	C18 H25 O10 S	18	25	0	10	1	NA	NA	433.116	NA	NA	0	0	3181145	0	0	NA means under detection limit
433.116	C18 H25 O10 S	18	25	0	10	1	433.116	NA	NA	NA	NA	3244312	0	0	0	0	NA means under detection limit
433.116	C18 H25 O10 S	18	25	0	10	1	NA	433.116	NA	NA	NA	0	2718914	0	0	0	NA means under detection limit
433.116	C18 H25 O10 S	18	25	0	10	1	NA	NA	NA	433.116	NA	0	0	0	4846887	0	NA means under detection limit
433.134	C18 H25 O12	18	25	0	12	0	NA	NA	NA	433.134	NA	0	0	0	13233452	0	NA means under detection limit
433.149	C22 H25 O9	22	25	0	9	0	NA	NA	433.149	NA	NA	0	0	4472416	0	0	NA means under detection limit
433.149	C22 H25 O9	22	25	0	9	0	433.149	NA	NA	NA	NA	5124383	0	0	0	0	NA means under detection limit
433.149	C22 H25 O9	22	25	0	9	0	NA	433.149	NA	NA	NA	0	4245706	0	0	0	NA means under detection limit
433.149	C22 H25 O9	22	25	0	9	0	NA	NA	NA	433.149	NA	0	0	0	10575152	0	NA means under detection limit
433.207	C20 H33 O10	20	33	0	10	0	NA	433.207	NA	NA	NA	0	6434007	0	0	0	NA means under detection limit
433.331	C27 H45 O4	27	45	0	4	0	NA	NA	NA	NA	433.331	0	0	0	0	2651271	NA means under detection limit
434.112	C17 H24 N O10 S	17	24	1	10	1	NA	NA	NA	434.111	NA	0	0	0	2860102	0	NA means under detection limit
435.092	C20 H19 O11	20	19	0	11	0	NA	NA	435.092	NA	NA	0	0	7453694	0	0	NA means under detection limit
435.092	C20 H19 O11	20	19	0	11	0	435.092	NA	NA	NA	NA	9036453	0	0	0	0	NA means under detection limit
435.092	C20 H19 O11	20	19	0	11	0	NA	435.092	NA	NA	NA	0	7278230	0	0	0	NA means under detection limit
435.092	C20 H19 O11	20	19	0	11	0	NA	NA	NA	435.092	NA	0	0	0	21049184	0	NA means under detection limit
435.096	C17 H23 O11 S	17	23	0	11	1	NA	NA	NA	435.096	NA	0	0	0	26267490	0	NA means under detection limit
435.113	C17 H23 O13	17	23	0	13	0	NA	NA	NA	435.113	NA	0	0	0	3488615	0	NA means under detection limit
435.129	C21 H23 O10	21	23	0	10	0	NA	NA	435.129	NA	NA	0	0	8111109	0	0	NA means under detection limit
435.129	C21 H23 O10	21	23	0	10	0	435.129	NA	NA	NA	NA	8702636	0	0	0	0	NA means under detection limit
435.129	C21 H23 O10	21	23	0	10	0	NA	435.129	NA	NA	NA	0	6762142	0	0	0	NA means under detection limit
435.129	C21 H23 O10	21	23	0	10	0	NA	NA	NA	435.129	NA	0	0	0	23539562	0	NA means under detection limit
435.15	C18 H27 O12	18	27	0	12	0	NA	NA	NA	435.15	NA	0	0	0	3124081	0	NA means under detection limit
435.165	C22 H27 O9	22	27	0	9	0	NA	NA	435.165	NA	NA	0	0	6804493	0	0	NA means under detection limit
435.165	C22 H27 O9	22	27	0	9	0	435.165	NA	NA	NA	NA	7416500	0	0	0	0	NA means under detection limit
435.165	C22 H27 O9	22	27	0	9	0	NA	435.165	NA	NA	NA	0	6401703	0	0	0	NA means under detection limit
435.165	C22 H27 O9	22	27	0	9	0	NA	NA	NA	435.165	NA	0	0	0	35147636	0	NA means under detection limit
436.127	C17 H26 N O10 S	17	26	1	10	1	NA	NA	NA	436.127	NA	0	0	0	6250633	0	NA means under detection limit
436.164	C18 H30 N O9 S	18	30	1	9	1	NA	NA	NA	436.164	NA	0	0	0	5102739	0	NA means under detection limit
437.071	C19 H17 O12	19	17	0	12	0	NA	NA	437.071	NA	NA	0	0	5154207	0	0	NA means under detection limit
437.071	C19 H17 O12	19	17	0	12	0	437.071	NA	NA	NA	NA	6552625	0	0	0	0	NA means under detection limit
437.071	C19 H17 O12	19	17	0	12	0	NA	437.071	NA	NA	NA	0	5634150	0	0	0	NA means under detection limit
437.071	C19 H17 O12	19	17	0	12	0	NA	NA	NA	437.071	NA	0	0	0	19755414	0	NA means under detection limit
437.108	C20 H21 O11	20	21	0	11	0	NA	NA	437.108	NA	NA	0	0	11982246	0	0	NA means under detection limit
437.108	C20 H21 O11	20	21	0	11	0	437.108	NA	NA	NA	NA	13517880	0	0	0	0	NA means under detection limit
437.108	C20 H21 O11	20	21	0	11	0	NA	437.108	NA	NA	NA	0	10303598	0	0	0	NA means under detection limit
437.108	C20 H21 O11	20	21	0	11	0	NA	NA	NA	437.108	NA	0	0	0	45724064	0	NA means under detection limit
437.144	C21 H25 O10	21	25	0	10	0	NA	NA	437.144	NA	NA	0	0	8871342	0	0	NA means under detection limit
437.144	C21 H25 O10	21	25	0	10	0	437.144	NA	NA	NA	NA	9288768	0	0	0	0	NA means under detection limit
437.144	C21 H25 O10	21	25	0	10	0	NA	437.144	NA	NA	NA	0	9072759	0	0	0	NA means under detection limit
437.144	C21 H25 O10	21	25	0	10	0	NA	NA	NA	437.144	NA	0	0	0	33501610	0	NA means under detection limit
437.181	C22 H29 O9	22	29	0	9	0	NA	NA	NA	437.181	NA	0	0	0	6238645	0	NA means under detection limit
437.236	C24 H37 O5 S	24	37	0	5	1	NA	NA	NA	NA	437.236	0	0	0	0	2655169	NA means under detection limit
437.236	C24 H37 O5 S	24	37	0	5	1	NA	NA	NA	NA	437.236	0	0	0	0	2773132	NA means under detection limit
437.435	C29 H57 O2	29	57	0	2	0	NA	NA	NA	NA	437.435	0	0	0	0	2653163	NA means under detection limit
437.435	C29 H57 O2	29	57	0	2	0	NA	NA	NA	NA	437.435	0	0	0	0	2681978	NA means under detection limit
437.472	C30 H61 O	30	61	0	1	0	NA	NA	437.472	NA	NA	0	0	3194354	0	0	NA means under detection limit
438.143	C17 H28 N O10 S	17	28	1	10	1	NA	NA	NA	438.143	NA	0	0	0	33542854	0	NA means under detection limit
439.051	C18 H15 O13	18	15	0	13	0	NA	NA	NA	439.051	NA	0	0	0	3004358	0	NA means under detection limit
439.087	C19 H19 O12	19	19	0	12	0	NA	NA	439.087	NA	NA	0	0	11884354	0	0	NA means under detection limit
439.087	C19 H19 O12	19	19	0	12	0	439.087	NA	NA	NA	NA	17253828	0	0	0	0	NA means under detection limit
439.087	C19 H19 O12	19	19	0	12	0	NA	439.087	NA	NA	NA	0	11616827	0	0	0	NA means under detection limit
439.087	C19 H19 O12	19	19	0	12	0	NA	NA	NA	439.087	NA	0	0	0	80327632	0	NA means under detection limit
439.123	C20 H23 O11	20	23	0	11	0	NA	NA	439.123	NA	NA	0	0	15861577	0	0	NA means under detection limit
439.123	C20 H23 O11	20	23	0	11	0	439.123	NA	NA	NA	NA	18101706	0	0	0	0	NA means under detection limit
439.123	C20 H23 O11	20	23	0	11	0	NA	439.124	NA	NA	NA	0	14336579	0	0	0	NA means under detection limit
439.123	C20 H23 O11	20	23	0	11	0	NA	NA	NA	439.123	NA	0	0	0	94254040	0	NA means under detection limit
439.16	C21 H27 O10	21	27	0	10	0	NA	NA	439.16	NA	NA	0	0	7382865	0	0	NA means under detection limit
439.16	C21 H27 O10	21	27	0	10	0	439.16	NA	NA	NA	NA	7067090	0	0	0	0	NA means under detection limit
439.16	C21 H27 O10	21	27	0	10	0	NA	439.16	NA	NA	NA	0	7920204	0	0	0	NA means under detection limit
439.16	C21 H27 O10	21	27	0	10	0	NA	NA	NA	439.16	NA	0	0	0	39293924	0	NA means under detection limit
439.196	C22 H31 O9	22	31	0	9	0	NA	NA	NA	439.196	NA	0	0	0	7222255	0	NA means under detection limit
439.378	C27 H51 O4	27	51	0	4	0	NA	NA	NA	NA	439.378	0	0	0	0	3048318	NA means under detection limit
439.378	C27 H51 O4	27	51	0	4	0	NA	NA	NA	NA	439.378	0	0	0	0	4109950	NA means under detection limit
440.122	C16 H26 N O11 S	16	26	1	11	1	NA	NA	NA	440.122	NA	0	0	0	3064050	0	NA means under detection limit
440.158	C17 H30 N O10 S	17	30	1	10	1	NA	NA	NA	440.158	NA	0	0	0	19936508	0	NA means under detection limit
441.066	C18 H17 O13	18	17	0	13	0	NA	NA	NA	441.066	NA	0	0	0	12756474	0	NA means under detection limit
441.103	C19 H21 O12	19	21	0	12	0	NA	NA	441.103	NA	NA	0	0	13265121	0	0	NA means under detection limit
441.103	C19 H21 O12	19	21	0	12	0	441.103	NA	NA	NA	NA	17520468	0	0	0	0	NA means under detection limit
441.103	C19 H21 O12	19	21	0	12	0	NA	441.103	NA	NA	NA	0	12772363	0	0	0	NA means under detection limit
441.103	C19 H21 O12	19	21	0	12	0	NA	NA	NA	441.103	NA	0	0	0	148846080	0	NA means under detection limit
441.139	C20 H25 O11	20	25	0	11	0	NA	NA	441.139	NA	NA	0	0	11495656	0	0	NA means under detection limit
441.139	C20 H25 O11	20	25	0	11	0	441.139	NA	NA	NA	NA	13481819	0	0	0	0	NA means under detection limit
441.139	C20 H25 O11	20	25	0	11	0	NA	441.139	NA	NA	NA	0	10376212	0	0	0	NA means under detection limit
441.139	C20 H25 O11	20	25	0	11	0	NA	NA	NA	441.139	NA	0	0	0	94549520	0	NA means under detection limit
441.176	C21 H29 O10	21	29	0	10	0	441.176	NA	NA	NA	NA	2759523	0	0	0	0	NA means under detection limit
441.176	C21 H29 O10	21	29	0	10	0	NA	441.176	NA	NA	NA	0	2800668	0	0	0	NA means under detection limit
441.176	C21 H29 O10	21	29	0	10	0	NA	NA	NA	441.176	NA	0	0	0	25654808	0	NA means under detection limit
441.321	C25 H45 O6	25	45	0	6	0	NA	441.321	NA	NA	NA	0	2811453	0	0	0	NA means under detection limit
441.394	C27 H53 O4	27	53	0	4	0	NA	441.394	NA	NA	NA	0	2709582	0	0	0	NA means under detection limit
442.138	C16 H28 N O11 S	16	28	1	11	1	NA	NA	NA	442.138	NA	0	0	0	2865445	0	NA means under detection limit
442.389	C26 H52 N O4	26	52	1	4	0	NA	NA	NA	442.389	NA	0	0	0	3061610	0	NA means under detection limit
443.082	C18 H19 O13	18	19	0	13	0	NA	NA	NA	443.082	NA	0	0	0	61896744	0	NA means under detection limit
443.097	C22 H19 O10	22	19	0	10	0	443.097	NA	NA	NA	NA	3207393	0	0	0	0	NA means under detection limit
443.101	C19 H23 O10 S	19	23	0	10	1	NA	NA	NA	443.101	NA	0	0	0	9261103	0	NA means under detection limit
443.118	C19 H23 O12	19	23	0	12	0	NA	NA	443.118	NA	NA	0	0	10826363	0	0	NA means under detection limit
443.118	C19 H23 O12	19	23	0	12	0	443.118	NA	NA	NA	NA	28330214	0	0	0	0	NA means under detection limit
443.118	C19 H23 O12	19	23	0	12	0	NA	443.118	NA	NA	NA	0	15042007	0	0	0	NA means under detection limit
443.118	C19 H23 O12	19	23	0	12	0	NA	NA	NA	443.118	NA	0	0	0	402864192	0	NA means under detection limit
443.134	C23 H23 O9	23	23	0	9	0	NA	NA	443.134	NA	NA	0	0	3313278	0	0	NA means under detection limit
443.134	C23 H23 O9	23	23	0	9	0	443.134	NA	NA	NA	NA	3561704	0	0	0	0	NA means under detection limit
443.134	C23 H23 O9	23	23	0	9	0	NA	443.134	NA	NA	NA	0	3234267	0	0	0	NA means under detection limit
443.155	C20 H27 O11	20	27	0	11	0	NA	NA	443.155	NA	NA	0	0	9284226	0	0	NA means under detection limit
443.155	C20 H27 O11	20	27	0	11	0	443.155	NA	NA	NA	NA	9763052	0	0	0	0	NA means under detection limit
443.155	C20 H27 O11	20	27	0	11	0	NA	443.155	NA	NA	NA	0	8785376	0	0	0	NA means under detection limit
443.155	C20 H27 O11	20	27	0	11	0	NA	NA	NA	443.155	NA	0	0	0	87439424	0	NA means under detection limit
443.191	C21 H31 O10	21	31	0	10	0	NA	NA	NA	443.191	NA	0	0	0	7073864	0	NA means under detection limit
443.264	C23 H39 O8	23	39	0	8	0	NA	NA	443.264	NA	NA	0	0	5096089	0	0	NA means under detection limit
443.264	C23 H39 O8	23	39	0	8	0	443.264	NA	NA	NA	NA	11696386	0	0	0	0	NA means under detection limit
443.264	C23 H39 O8	23	39	0	8	0	NA	443.264	NA	NA	NA	0	6989305	0	0	0	NA means under detection limit
444.368	C25 H50 N O5	25	50	1	5	0	NA	NA	NA	444.368	NA	0	0	0	4009357	0	NA means under detection limit
444.405	C26 H54 N O4	26	54	1	4	0	NA	NA	NA	444.405	NA	0	0	0	7188887	0	NA means under detection limit
445.098	C18 H21 O13	18	21	0	13	0	NA	NA	NA	445.098	NA	0	0	0	58718804	0	NA means under detection limit
445.113	C22 H21 O10	22	21	0	10	0	445.113	NA	NA	NA	NA	4826739	0	0	0	0	NA means under detection limit
445.113	C22 H21 O10	22	21	0	10	0	NA	445.113	NA	NA	NA	0	3834778	0	0	0	NA means under detection limit
445.113	C22 H21 O10	22	21	0	10	0	NA	NA	NA	445.113	NA	0	0	0	7713369	0	NA means under detection limit
445.116	C19 H25 O10 S	19	25	0	10	1	NA	NA	445.116	NA	NA	0	0	3689485	0	0	NA means under detection limit
445.116	C19 H25 O10 S	19	25	0	10	1	445.116	NA	NA	NA	NA	7981683	0	0	0	0	NA means under detection limit
445.116	C19 H25 O10 S	19	25	0	10	1	NA	445.116	NA	NA	NA	0	11147163	0	0	0	NA means under detection limit
445.134	C19 H25 O12	19	25	0	12	0	NA	NA	NA	445.134	NA	0	0	0	46283360	0	NA means under detection limit
445.149	C23 H25 O9	23	25	0	9	0	NA	NA	445.149	NA	NA	0	0	3613716	0	0	NA means under detection limit
445.149	C23 H25 O9	23	25	0	9	0	445.149	NA	NA	NA	NA	3407482	0	0	0	0	NA means under detection limit
445.149	C23 H25 O9	23	25	0	9	0	NA	445.149	NA	NA	NA	0	3135907	0	0	0	NA means under detection limit
445.17	C20 H29 O11	20	29	0	11	0	NA	NA	445.17	NA	NA	0	0	34556952	0	0	NA means under detection limit
445.17	C20 H29 O11	20	29	0	11	0	445.17	NA	NA	NA	NA	39594620	0	0	0	0	NA means under detection limit
445.17	C20 H29 O11	20	29	0	11	0	NA	445.17	NA	NA	NA	0	32425896	0	0	0	NA means under detection limit
445.17	C20 H29 O11	20	29	0	11	0	NA	NA	NA	445.17	NA	0	0	0	268712544	0	NA means under detection limit
445.186	C24 H29 O8	24	29	0	8	0	NA	NA	445.186	NA	NA	0	0	2888731	0	0	NA means under detection limit
445.186	C24 H29 O8	24	29	0	8	0	445.186	NA	NA	NA	NA	2700929	0	0	0	0	NA means under detection limit
445.335	C25 H49 O4 S	25	49	0	4	1	NA	NA	NA	NA	445.335	0	0	0	0	16075833	NA means under detection limit
445.335	C25 H49 O4 S	25	49	0	4	1	NA	NA	NA	NA	445.335	0	0	0	0	12438175	NA means under detection limit
445.335	C25 H49 O4 S	25	49	0	4	1	NA	NA	NA	NA	445.335	0	0	0	0	13613004	NA means under detection limit
445.335	C25 H49 O4 S	25	49	0	4	1	NA	NA	NA	NA	445.335	0	0	0	0	23739030	NA means under detection limit
446.087	C24 H16 N O8	24	16	1	8	0	NA	NA	NA	446.087	NA	0	0	0	6613859	0	NA means under detection limit
446.087	C24 H16 N O8	24	16	1	8	0	NA	NA	446.087	NA	NA	0	0	6315215	0	0	NA means under detection limit
446.087	C24 H16 N O8	24	16	1	8	0	446.087	NA	NA	NA	NA	5503797	0	0	0	0	NA means under detection limit
446.087	C24 H16 N O8	24	16	1	8	0	NA	446.087	NA	NA	NA	0	5415029	0	0	0	NA means under detection limit
446.123	C25 H20 N O7	25	20	1	7	0	NA	NA	446.123	NA	NA	0	0	3627222	0	0	NA means under detection limit
446.123	C25 H20 N O7	25	20	1	7	0	446.123	NA	NA	NA	NA	4079420	0	0	0	0	NA means under detection limit
446.384	C25 H52 N O5	25	52	1	5	0	NA	NA	NA	446.384	NA	0	0	0	4940724	0	NA means under detection limit
446.42	C26 H56 N O4	26	56	1	4	0	NA	NA	NA	446.42	NA	0	0	0	9063358	0	NA means under detection limit
447.077	C17 H19 O14	17	19	0	14	0	NA	NA	NA	447.077	NA	0	0	0	12586096	0	NA means under detection limit
447.08	C14 H23 O14 S	14	23	0	14	1	NA	NA	NA	NA	447.08	0	0	0	0	11505044	NA means under detection limit
447.08	C14 H23 O14 S	14	23	0	14	1	NA	NA	NA	NA	447.08	0	0	0	0	11754491	NA means under detection limit
447.08	C14 H23 O14 S	14	23	0	14	1	NA	NA	NA	NA	447.081	0	0	0	0	11999571	NA means under detection limit
447.08	C14 H23 O14 S	14	23	0	14	1	NA	NA	NA	NA	447.08	0	0	0	0	10413169	NA means under detection limit
447.092	C21 H19 O11	21	19	0	11	0	NA	NA	447.092	NA	NA	0	0	5496215	0	0	NA means under detection limit
447.092	C21 H19 O11	21	19	0	11	0	447.092	NA	NA	NA	NA	5393406	0	0	0	0	NA means under detection limit
447.092	C21 H19 O11	21	19	0	11	0	NA	447.092	NA	NA	NA	0	3784022	0	0	0	NA means under detection limit
447.092	C21 H19 O11	21	19	0	11	0	NA	NA	NA	447.092	NA	0	0	0	8154229	0	NA means under detection limit
447.096	C18 H23 O11 S	18	23	0	11	1	NA	NA	NA	447.096	NA	0	0	0	9389173	0	NA means under detection limit
447.113	C18 H23 O13	18	23	0	13	0	NA	NA	NA	447.113	NA	0	0	0	20339834	0	NA means under detection limit
447.117	C15 H27 O13 S	15	27	0	13	1	NA	NA	NA	NA	447.117	0	0	0	0	5185948	NA means under detection limit
447.117	C15 H27 O13 S	15	27	0	13	1	NA	NA	NA	NA	447.117	0	0	0	0	4488540	NA means under detection limit
447.117	C15 H27 O13 S	15	27	0	13	1	NA	NA	NA	NA	447.117	0	0	0	0	3839611	NA means under detection limit
447.129	C22 H23 O10	22	23	0	10	0	NA	NA	447.129	NA	NA	0	0	5875102	0	0	NA means under detection limit
447.129	C22 H23 O10	22	23	0	10	0	447.129	NA	NA	NA	NA	7222277	0	0	0	0	NA means under detection limit
447.129	C22 H23 O10	22	23	0	10	0	NA	447.129	NA	NA	NA	0	5816670	0	0	0	NA means under detection limit
447.129	C22 H23 O10	22	23	0	10	0	NA	NA	NA	447.129	NA	0	0	0	13991038	0	NA means under detection limit
447.15	C19 H27 O12	19	27	0	12	0	NA	NA	NA	447.15	NA	0	0	0	15907972	0	NA means under detection limit
447.165	C23 H27 O9	23	27	0	9	0	NA	NA	447.165	NA	NA	0	0	3941797	0	0	NA means under detection limit
447.165	C23 H27 O9	23	27	0	9	0	447.165	NA	NA	NA	NA	4799500	0	0	0	0	NA means under detection limit
447.165	C23 H27 O9	23	27	0	9	0	NA	447.165	NA	NA	NA	0	4266342	0	0	0	NA means under detection limit
447.165	C23 H27 O9	23	27	0	9	0	NA	NA	NA	447.165	NA	0	0	0	9077896	0	NA means under detection limit
447.347	C28 H47 O4	28	47	0	4	0	NA	NA	NA	NA	447.347	0	0	0	0	6833610	NA means under detection limit
447.347	C28 H47 O4	28	47	0	4	0	NA	NA	NA	NA	447.347	0	0	0	0	6257713	NA means under detection limit
447.347	C28 H47 O4	28	47	0	4	0	NA	NA	NA	NA	447.347	0	0	0	0	6007183	NA means under detection limit
447.347	C28 H47 O4	28	47	0	4	0	NA	NA	NA	NA	447.347	0	0	0	0	13040826	NA means under detection limit
448.127	C18 H26 N O10 S	18	26	1	10	1	NA	NA	NA	448.127	NA	0	0	0	3837325	0	NA means under detection limit
449.108	C21 H21 O11	21	21	0	11	0	NA	NA	449.108	NA	NA	0	0	9443108	0	0	NA means under detection limit
449.108	C21 H21 O11	21	21	0	11	0	449.108	NA	NA	NA	NA	10286481	0	0	0	0	NA means under detection limit
449.108	C21 H21 O11	21	21	0	11	0	NA	449.108	NA	NA	NA	0	8110870	0	0	0	NA means under detection limit
449.108	C21 H21 O11	21	21	0	11	0	NA	NA	NA	449.108	NA	0	0	0	20686486	0	NA means under detection limit
449.111	C18 H25 O11 S	18	25	0	11	1	NA	NA	NA	449.111	NA	0	0	0	456474272	0	NA means under detection limit
449.129	C18 H25 O13	18	25	0	13	0	NA	NA	NA	449.129	NA	0	0	0	2877084	0	NA means under detection limit
449.144	C22 H25 O10	22	25	0	10	0	NA	NA	449.144	NA	NA	0	0	5953324	0	0	NA means under detection limit
449.144	C22 H25 O10	22	25	0	10	0	449.144	NA	NA	NA	NA	5774745	0	0	0	0	NA means under detection limit
449.144	C22 H25 O10	22	25	0	10	0	NA	449.144	NA	NA	NA	0	5870366	0	0	0	NA means under detection limit
449.144	C22 H25 O10	22	25	0	10	0	NA	NA	NA	449.144	NA	0	0	0	21946016	0	NA means under detection limit
449.165	C19 H29 O12	19	29	0	12	0	NA	NA	NA	449.165	NA	0	0	0	3332773	0	NA means under detection limit
449.181	C23 H29 O9	23	29	0	9	0	NA	NA	449.181	NA	NA	0	0	2958131	0	0	NA means under detection limit
449.181	C23 H29 O9	23	29	0	9	0	449.181	NA	NA	NA	NA	4000160	0	0	0	0	NA means under detection limit
449.181	C23 H29 O9	23	29	0	9	0	NA	NA	NA	449.181	NA	0	0	0	13033129	0	NA means under detection limit
450.116	C21 H22 O11	21	22	0	11	0	NA	NA	NA	450.116	NA	0	0	0	7536549	0	NA means under detection limit
450.143	C18 H28 N O10 S	18	28	1	10	1	NA	NA	NA	450.143	NA	0	0	0	9971628	0	NA means under detection limit
451.087	C20 H19 O12	20	19	0	12	0	NA	NA	451.087	NA	NA	0	0	7305383	0	0	NA means under detection limit
451.087	C20 H19 O12	20	19	0	12	0	451.087	NA	NA	NA	NA	10346272	0	0	0	0	NA means under detection limit
451.087	C20 H19 O12	20	19	0	12	0	NA	451.087	NA	NA	NA	0	7890121	0	0	0	NA means under detection limit
451.087	C20 H19 O12	20	19	0	12	0	NA	NA	NA	451.087	NA	0	0	0	29040808	0	NA means under detection limit
451.123	C21 H23 O11	21	23	0	11	0	NA	NA	451.123	NA	NA	0	0	8620206	0	0	NA means under detection limit
451.123	C21 H23 O11	21	23	0	11	0	451.123	NA	NA	NA	NA	12046120	0	0	0	0	NA means under detection limit
451.123	C21 H23 O11	21	23	0	11	0	NA	451.123	NA	NA	NA	0	9272529	0	0	0	NA means under detection limit
451.123	C21 H23 O11	21	23	0	11	0	NA	NA	NA	451.123	NA	0	0	0	44810420	0	NA means under detection limit
451.16	C22 H27 O10	22	27	0	10	0	NA	NA	451.16	NA	NA	0	0	6009013	0	0	NA means under detection limit
451.16	C22 H27 O10	22	27	0	10	0	451.16	NA	NA	NA	NA	6825775	0	0	0	0	NA means under detection limit
451.16	C22 H27 O10	22	27	0	10	0	NA	451.16	NA	NA	NA	0	6581465	0	0	0	NA means under detection limit
451.16	C22 H27 O10	22	27	0	10	0	NA	NA	NA	451.16	NA	0	0	0	28655804	0	NA means under detection limit
451.451	C30 H59 O2	30	59	0	2	0	NA	NA	NA	NA	451.451	0	0	0	0	3148650	NA means under detection limit
452.122	C17 H26 N O11 S	17	26	1	11	1	NA	NA	NA	452.122	NA	0	0	0	3642813	0	NA means under detection limit
452.158	C18 H30 N O10 S	18	30	1	10	1	NA	NA	NA	452.159	NA	0	0	0	14451142	0	NA means under detection limit
453.066	C19 H17 O13	19	17	0	13	0	NA	NA	453.066	NA	NA	0	0	2891302	0	0	NA means under detection limit
453.066	C19 H17 O13	19	17	0	13	0	453.066	NA	NA	NA	NA	4698290	0	0	0	0	NA means under detection limit
453.066	C19 H17 O13	19	17	0	13	0	NA	453.066	NA	NA	NA	0	3075704	0	0	0	NA means under detection limit
453.103	C20 H21 O12	20	21	0	12	0	NA	NA	453.103	NA	NA	0	0	13394477	0	0	NA means under detection limit
453.103	C20 H21 O12	20	21	0	12	0	453.103	NA	NA	NA	NA	17285306	0	0	0	0	NA means under detection limit
453.103	C20 H21 O12	20	21	0	12	0	NA	453.103	NA	NA	NA	0	13303424	0	0	0	NA means under detection limit
[truncated: 2,096 more rows]
