# Supplementary material for: Methods to characterize type, relevance, and interactions of organic matter and microorganisms in fluids along the flow path of a geothermal facility
Source: Copernicus journal article supplement (doi:10.5194/bg-2023-159), 2023-09-22
Supplement: Supplementary file 2 [file Suplements_FTICRMS_ESI_data.xlsx]

## Sheet: Data
CalculatedMass_ion	SumFormula_ion	C	H	N	O	S	ObservedMass_ion_Production	ObservedMass_ion_Heat Central	ObservedMass_ion_Injection	ObservedMass_ion_Inhibitor	ObservedMass_ion_Blank	ABUNDANCE_Production	ABUNDANCE_Heat Central	ABUNDANCE_Injection	ABUNDANCE_Inhibitor	ABUNDANCE_Blank	Comments
157.014	C6 H5 O5	6	5	0	5	0	NA	NA	NA	157.014	NA	0	0	0	2828486	0	NA mean under detection limit
165.019	C8 H5 O4	8	5	0	4	0	NA	NA	165.019	NA	NA	0	0	2468786	0	0	NA mean under detection limit
165.056	C9 H9 O3	9	9	0	3	0	NA	NA	NA	165.056	NA	0	0	0	2898149	0	NA mean under detection limit
165.128	C11 H17 O	11	17	0	1	0	NA	NA	NA	165.128	NA	0	0	0	1717060	0	NA mean under detection limit
167.071	C9 H11 O3	9	11	0	3	0	NA	NA	NA	167.071	NA	0	0	0	2718109	0	NA mean under detection limit
167.108	C10 H15 O2	10	15	0	2	0	NA	NA	NA	167.108	NA	0	0	0	2641629	0	NA mean under detection limit
169.087	C9 H13 O3	9	13	0	3	0	NA	NA	NA	169.087	NA	0	0	0	5684836	0	NA mean under detection limit
171.03	C7 H7 O5	7	7	0	5		NA	NA	NA	171.03	NA	0	0	0	2168898	0	NA mean under detection limit
171.066	C8 H11 O4	8	11	0	4	0	171.066	NA	NA	NA	NA	1985625	0	0	0	0	NA mean under detection limit
171.066	C8 H11 O4	8	11	0	4	0	NA	NA	NA	171.066	NA	0	0	0	7653766	0	NA mean under detection limit
175.025	C6 H7 O6	6	7	0	6	0	NA	NA	NA	175.025	NA	0	0	0	4865175	0	NA mean under detection limit
175.076	C11 H11 O2	11	11	0	2	0	NA	NA	NA	175.076	NA	0	0	0	1991523	0	NA mean under detection limit
177.092	C11 H13 O2	11	13	0	2	0	NA	NA	NA	177.092	NA	0	0	0	2140670	0	NA mean under detection limit
177.128	C12 H17 O	12	17	0	1	0	NA	NA	NA	177.128	NA	0	0	0	2391625	0	NA mean under detection limit
178.018	C5 H8 N O4 S	5	8	1	4	1	NA	NA	NA	178.018	NA	0	0	0	4500262	0	NA mean under detection limit
179.035	C9 H7 O4	9	7	0	4	0	NA	NA	179.035	NA	NA	0	0	3410388	0	0	NA mean under detection limit
179.035	C9 H7 O4	9	7	0	4	0	NA	179.035	NA	NA	NA	0	2212536	0	0	0	NA mean under detection limit
179.071	C10 H11 O3	10	11	0	3	0	NA	179.071	NA	NA	NA	0	1793317	0	0	0	NA mean under detection limit
179.071	C10 H11 O3	10	11	0	3	0	NA	NA	NA	179.071	NA	0	0	0	3449881	0	NA mean under detection limit
179.108	C11 H15 O2	11	15	0	2	0	NA	NA	179.108	NA	NA	0	0	1697165	0	0	NA mean under detection limit
179.108	C11 H15 O2	11	15	0	2	0	NA	NA	NA	179.108	NA	0	0	0	4326502	0	NA mean under detection limit
181.014	C8 H5 O5	8	5	0	5	0	NA	NA	181.014	NA	NA	0	0	3202740	0	0	NA mean under detection limit
181.014	C8 H5 O5	8	5	0	5	0	NA	181.014	NA	NA	NA	0	2059406	0	0	0	NA mean under detection limit
181.051	C9 H9 O4	9	9	0	4	0	NA	NA	NA	181.051	NA	0	0	0	1762546	0	NA mean under detection limit
181.087	C10 H13 O3	10	13	0	3	0	NA	NA	181.087	NA	NA	0	0	4872721	0	0	NA mean under detection limit
181.087	C10 H13 O3	10	13	0	3	0	181.087	NA	NA	NA	NA	4766244	0	0	0	0	NA mean under detection limit
181.087	C10 H13 O3	10	13	0	3	0	NA	181.087	NA	NA	NA	0	3509228	0	0	0	NA mean under detection limit
181.087	C10 H13 O3	10	13	0	3	0	NA	NA	NA	181.087	NA	0	0	0	13183426	0	NA mean under detection limit
181.123	C11 H17 O2	11	17	0	2	0	NA	NA	NA	181.123	NA	0	0	0	1925778	0	NA mean under detection limit
181.992	C7 H4 N O3 S	7	4	1	3	1	NA	NA	NA	181.992	NA	0	0	0	2557398	0	NA mean under detection limit
183.012	C8 H7 O3 S	8	7	0	3	1	NA	NA	NA	NA	183.012	0	0	0	0	2452683	NA mean under detection limit
183.012	C8 H7 O3 S	8	7	0	3	1	NA	NA	NA	NA	183.012	0	0	0	0	2265472	NA mean under detection limit
183.03	C8 H7 O5	8	7	0	5	0	NA	NA	183.03	NA	NA	0	0	2931859	0	0	NA mean under detection limit
183.03	C8 H7 O5	8	7	0	5	0	NA	183.03	NA	NA	NA	0	4081160	0	0	0	NA mean under detection limit
183.03	C8 H7 O5	8	7	0	5	0	NA	NA	NA	183.03	NA	0	0	0	2547907	0	NA mean under detection limit
183.066	C9 H11 O4	9	11	0	4	0	NA	NA	183.066	NA	NA	0	0	2678243	0	0	NA mean under detection limit
183.066	C9 H11 O4	9	11	0	4	0	183.066	NA	NA	NA	NA	2580369	0	0	0	0	NA mean under detection limit
183.066	C9 H11 O4	9	11	0	4	0	NA	NA	NA	183.066	NA	0	0	0	8571221	0	NA mean under detection limit
183.103	C10 H15 O3	10	15	0	3	0	NA	NA	NA	183.103	NA	0	0	0	1905831	0	NA mean under detection limit
183.139	C11 H19 O2	11	19	0	2	0	NA	NA	NA	183.139	NA	0	0	0	2488633	0	NA mean under detection limit
185.046	C8 H9 O5	8	9	0	5	0	NA	NA	185.046	NA	NA	0	0	2854237	0	0	NA mean under detection limit
185.046	C8 H9 O5	8	9	0	5	0	185.046	NA	NA	NA	NA	3035559	0	0	0	0	NA mean under detection limit
185.046	C8 H9 O5	8	9	0	5	0	NA	185.046	NA	NA	NA	0	1928432	0	0	0	NA mean under detection limit
185.046	C8 H9 O5	8	9	0	5	0	NA	NA	NA	185.046	NA	0	0	0	18713686	0	NA mean under detection limit
185.082	C9 H13 O4	9	13	0	4	0	NA	NA	185.082	NA	NA	0	0	2315311	0	0	NA mean under detection limit
185.082	C9 H13 O4	9	13	0	4	0	NA	NA	NA	185.082	NA	0	0	0	2696234	0	NA mean under detection limit
187.025	C7 H7 O6	7	7	0	6	0	NA	NA	NA	187.025	NA	0	0	0	1754237	0	NA mean under detection limit
187.098	C9 H15 O4	9	15	0	4	0	NA	NA	NA	187.098	NA	0	0	0	3299752	0	NA mean under detection limit
189.04	C7 H9 O6	7	9	0	6	0	NA	NA	NA	189.04	NA	0	0	0	3067032	0	NA mean under detection limit
189.092	C12 H13 O2	12	13	0	2	0	NA	NA	189.092	NA	NA	0	0	1841498	0	0	NA mean under detection limit
189.092	C12 H13 O2	12	13	0	2	0	NA	NA	NA	189.092	NA	0	0	0	3236153	0	NA mean under detection limit
189.128	C13 H17 O	13	17	0	1	0	NA	NA	NA	189.128	NA	0	0	0	1826064	0	NA mean under detection limit
191.071	C11 H11 O3	11	11	0	3	0	NA	NA	NA	191.071	NA	0	0	0	2049493	0	NA mean under detection limit
191.108	C12 H15 O2	12	15	0	2	0	NA	NA	191.108	NA	NA	0	0	2095860	0	0	NA mean under detection limit
191.108	C12 H15 O2	12	15	0	2	0	NA	191.108	NA	NA	NA	0	1997008	0	0	0	NA mean under detection limit
191.108	C12 H15 O2	12	15	0	2	0	NA	NA	NA	191.108	NA	0	0	0	5790190	0	NA mean under detection limit
191.144	C13 H19 O	13	19	0	1	0	NA	NA	NA	191.144	NA	0	0	0	1956806	0	NA mean under detection limit
193.087	C11 H13 O3	11	13	0	3	0	NA	NA	193.087	NA	NA	0	0	2216639	0	0	NA mean under detection limit
193.087	C11 H13 O3	11	13	0	3	0	NA	193.087	NA	NA	NA	0	2376994	0	0	0	NA mean under detection limit
193.087	C11 H13 O3	11	13	0	3	0	NA	NA	NA	193.087	NA	0	0	0	7014999	0	NA mean under detection limit
195.066	C10 H11 O4	10	11	0	4	0	NA	NA	195.066	NA	NA	0	0	2052490	0	0	NA mean under detection limit
195.066	C10 H11 O4	10	11	0	4	0	NA	NA	NA	195.066	NA	0	0	0	5865987	0	NA mean under detection limit
195.103	C11 H15 O3	11	15	0	3	0	NA	NA	195.103	NA	NA	0	0	2356643	0	0	NA mean under detection limit
195.103	C11 H15 O3	11	15	0	3	0	NA	NA	NA	195.103	NA	0	0	0	4845598	0	NA mean under detection limit
195.139	C12 H19 O2	12	19	0	2	0	NA	NA	NA	195.139	NA	0	0	0	2778617	0	NA mean under detection limit
197.046	C9 H9 O5	9	9	0	5	0	NA	NA	197.046	NA	NA	0	0	6217740	0	0	NA mean under detection limit
197.046	C9 H9 O5	9	9	0	5	0	197.046	NA	NA	NA	NA	5292343	0	0	0	0	NA mean under detection limit
197.046	C9 H9 O5	9	9	0	5	0	NA	197.046	NA	NA	NA	0	5338176	0	0	0	NA mean under detection limit
197.046	C9 H9 O5	9	9	0	5	0	NA	NA	NA	197.046	NA	0	0	0	29644776	0	NA mean under detection limit
197.082	C10 H13 O4	10	13	0	4	0	NA	NA	NA	197.082	NA	0	0	0	3480581	0	NA mean under detection limit
197.118	C11 H17 O3	11	17	0	3	0	NA	NA	NA	197.118	NA	0	0	0	6060834	0	NA mean under detection limit
199.061	C9 H11 O5	9	11	0	5	0	NA	NA	199.061	NA	NA	0	0	2250393	0	0	NA mean under detection limit
199.061	C9 H11 O5	9	11	0	5	0	NA	NA	NA	199.061	NA	0	0	0	5383198	0	NA mean under detection limit
199.098	C10 H15 O4	10	15	0	4	0	NA	NA	NA	199.098	NA	0	0	0	8325436	0	NA mean under detection limit
200.002	C7 H6 N O4 S	7	6	1	4	1	NA	NA	NA	200.002	NA	0	0	0	3528340	0	NA mean under detection limit
201.04	C8 H9 O6	8	9	0	6	0	NA	NA	NA	201.04	NA	0	0	0	3667169	0	NA mean under detection limit
203.056	C8 H11 O6	8	11	0	6	0	NA	NA	203.056	NA	NA	0	0	2073674	0	0	NA mean under detection limit
203.056	C8 H11 O6	8	11	0	6	0	203.056	NA	NA	NA	NA	4085369	0	0	0	0	NA mean under detection limit
203.056	C8 H11 O6	8	11	0	6	0	NA	203.056	NA	NA	NA	0	1772224	0	0	0	NA mean under detection limit
203.056	C8 H11 O6	8	11	0	6	0	NA	NA	NA	203.056	NA	0	0	0	16854754	0	NA mean under detection limit
203.108	C13 H15 O2	13	15	0	2	0	NA	203.108	NA	NA	NA	0	1816745	0	0	0	NA mean under detection limit
203.108	C13 H15 O2	13	15	0	2	0	NA	NA	NA	203.108	NA	0	0	0	2801805	0	NA mean under detection limit
205.087	C12 H13 O3	12	13	0	3	0	NA	205.087	NA	NA	NA	0	1831784	0	0	0	NA mean under detection limit
205.087	C12 H13 O3	12	13	0	3	0	NA	NA	NA	205.087	NA	0	0	0	3209481	0	NA mean under detection limit
205.123	C13 H17 O2	13	17	0	2	0	NA	NA	NA	205.123	NA	0	0	0	2508200	0	NA mean under detection limit
206.049	C7 H12 N O4 S	7	12	1	4	1	NA	NA	206.049	NA	NA	0	0	16847616	0	0	NA mean under detection limit
206.049	C7 H12 N O4 S	7	12	1	4	1	206.049	NA	NA	NA	NA	10382835	0	0	0	0	NA mean under detection limit
206.049	C7 H12 N O4 S	7	12	1	4	1	NA	206.049	NA	NA	NA	0	14004983	0	0	0	NA mean under detection limit
206.049	C7 H12 N O4 S	7	12	1	4	1	NA	NA	NA	206.049	NA	0	0	0	29324470	0	NA mean under detection limit
207.012	C10 H7 O3 S	10	7	0	3	1	NA	NA	207.012	NA	NA	0	0	3578879	0	0	NA mean under detection limit
207.012	C10 H7 O3 S	10	7	0	3	1	207.012	NA	NA	NA	NA	2484870	0	0	0	0	NA mean under detection limit
207.012	C10 H7 O3 S	10	7	0	3	1	NA	207.012	NA	NA	NA	0	3111818	0	0	0	NA mean under detection limit
207.066	C11 H11 O4	11	11	0	4	0	NA	207.066	NA	NA	NA	0	2513206	0	0	0	NA mean under detection limit
207.066	C11 H11 O4	11	11	0	4	0	NA	NA	NA	207.066	NA	0	0	0	4892692	0	NA mean under detection limit
207.103	C12 H15 O3	12	15	0	3	0	NA	207.103	NA	NA	NA	0	1849812	0	0	0	NA mean under detection limit
207.103	C12 H15 O3	12	15	0	3	0	NA	NA	NA	207.103	NA	0	0	0	3827763	0	NA mean under detection limit
207.139	C13 H19 O2	13	19	0	2	0	NA	NA	NA	207.139	NA	0	0	0	1974738	0	NA mean under detection limit
209.009	C9 H5 O6	9	5	0	6	0	NA	NA	209.009	NA	NA	0	0	27097144	0	0	NA mean under detection limit
209.009	C9 H5 O6	9	5	0	6	0	209.009	NA	NA	NA	NA	12262253	0	0	0	0	NA mean under detection limit
209.009	C9 H5 O6	9	5	0	6	0	NA	209.009	NA	NA	NA	0	14908526	0	0	0	NA mean under detection limit
209.046	C10 H9 O5	10	9	0	5	0	NA	NA	209.046	NA	NA	0	0	3029589	0	0	NA mean under detection limit
209.046	C10 H9 O5	10	9	0	5	0	209.046	NA	NA	NA	NA	1833867	0	0	0	0	NA mean under detection limit
209.046	C10 H9 O5	10	9	0	5	0	NA	209.046	NA	NA	NA	0	2967948	0	0	0	NA mean under detection limit
209.046	C10 H9 O5	10	9	0	5	0	NA	NA	NA	209.046	NA	0	0	0	6258854	0	NA mean under detection limit
209.082	C11 H13 O4	11	13	0	4	0	NA	NA	NA	209.082	NA	0	0	0	2279749	0	NA mean under detection limit
209.118	C12 H17 O3	12	17	0	3	0	NA	NA	209.118	NA	NA	0	0	2358800	0	0	NA mean under detection limit
209.118	C12 H17 O3	12	17	0	3	0	209.118	NA	NA	NA	NA	2036679	0	0	0	0	NA mean under detection limit
209.118	C12 H17 O3	12	17	0	3	0	NA	NA	NA	209.118	NA	0	0	0	9116900	0	NA mean under detection limit
211.061	C10 H11 O5	10	11	0	5	0	NA	NA	211.061	NA	NA	0	0	2738719	0	0	NA mean under detection limit
211.061	C10 H11 O5	10	11	0	5	0	211.061	NA	NA	NA	NA	2239361	0	0	0	0	NA mean under detection limit
211.061	C10 H11 O5	10	11	0	5	0	NA	211.061	NA	NA	NA	0	4216320	0	0	0	NA mean under detection limit
211.061	C10 H11 O5	10	11	0	5	0	NA	NA	NA	211.061	NA	0	0	0	7235413	0	NA mean under detection limit
211.098	C11 H15 O4	11	15	0	4	0	NA	NA	NA	211.098	NA	0	0	0	4971892	0	NA mean under detection limit
213.04	C9 H9 O6	9	9	0	6	0	NA	NA	NA	213.04	NA	0	0	0	2123739	0	NA mean under detection limit
213.077	C10 H13 O5	10	13	0	5	0	NA	NA	213.077	NA	NA	0	0	3108576	0	0	NA mean under detection limit
213.077	C10 H13 O5	10	13	0	5	0	213.077	NA	NA	NA	NA	3512686	0	0	0	0	NA mean under detection limit
213.077	C10 H13 O5	10	13	0	5	0	NA	213.077	NA	NA	NA	0	3143018	0	0	0	NA mean under detection limit
213.077	C10 H13 O5	10	13	0	5	0	NA	NA	NA	213.077	NA	0	0	0	19520504	0	NA mean under detection limit
213.113	C11 H17 O4	11	17	0	4	0	NA	NA	NA	213.113	NA	0	0	0	2537368	0	NA mean under detection limit
215.02	C8 H7 O7	8	7	0	7	0	215.02	NA	NA	NA	NA	2099728	0	0	0	0	NA mean under detection limit
215.02	C8 H7 O7	8	7	0	7	0	NA	NA	NA	215.02	NA	0	0	0	5200717	0	NA mean under detection limit
215.056	C9 H11 O6	9	11	0	6	0	NA	NA	215.056	NA	NA	0	0	12717813	0	0	NA mean under detection limit
215.056	C9 H11 O6	9	11	0	6	0	215.056	NA	NA	NA	NA	13328557	0	0	0	0	NA mean under detection limit
215.056	C9 H11 O6	9	11	0	6	0	NA	215.056	NA	NA	NA	0	8969637	0	0	0	NA mean under detection limit
215.056	C9 H11 O6	9	11	0	6	0	NA	NA	NA	215.056	NA	0	0	0	32280170	0	NA mean under detection limit
217.035	C8 H9 O7	8	9	0	7	0	NA	NA	NA	217.035	NA	0	0	0	2494401	0	NA mean under detection limit
217.072	C9 H13 O6	9	13	0	6	0	NA	NA	217.072	NA	NA	0	0	4221198	0	0	NA mean under detection limit
217.072	C9 H13 O6	9	13	0	6	0	NA	217.072	NA	NA	NA	0	3566308	0	0	0	NA mean under detection limit
217.072	C9 H13 O6	9	13	0	6	0	NA	NA	NA	217.072	NA	0	0	0	2123486	0	NA mean under detection limit
219.139	C14 H19 O2	14	19	0	2	0	NA	NA	NA	219.139	NA	0	0	0	2787029	0	NA mean under detection limit
221.082	C12 H13 O4	12	13	0	4	0	NA	221.082	NA	NA	NA	0	2021602	0	0	0	NA mean under detection limit
221.082	C12 H13 O4	12	13	0	4	0	NA	NA	NA	221.082	NA	0	0	0	2094907	0	NA mean under detection limit
221.118	C13 H17 O3	13	17	0	3	0	NA	NA	NA	221.118	NA	0	0	0	3999319	0	NA mean under detection limit
223.025	C10 H7 O6	10	7	0	6	0	NA	NA	223.025	NA	NA	0	0	5019958	0	0	NA mean under detection limit
223.025	C10 H7 O6	10	7	0	6	0	223.025	NA	NA	NA	NA	3013000	0	0	0	0	NA mean under detection limit
223.025	C10 H7 O6	10	7	0	6	0	NA	223.025	NA	NA	NA	0	3680109	0	0	0	NA mean under detection limit
223.025	C10 H7 O6	10	7	0	6	0	NA	NA	NA	223.025	NA	0	0	0	2278253	0	NA mean under detection limit
223.061	C11 H11 O5	11	11	0	5	0	NA	223.061	NA	NA	NA	0	2464903	0	0	0	NA mean under detection limit
223.061	C11 H11 O5	11	11	0	5	0	NA	NA	NA	223.061	NA	0	0	0	3258376	0	NA mean under detection limit
223.098	C12 H15 O4	12	15	0	4	0	NA	223.098	NA	NA	NA	0	2299041	0	0	0	NA mean under detection limit
223.098	C12 H15 O4	12	15	0	4	0	NA	NA	NA	223.098	NA	0	0	0	5552931	0	NA mean under detection limit
223.134	C13 H19 O3	13	19	0	3	0	NA	NA	NA	223.134	NA	0	0	0	2428349	0	NA mean under detection limit
225.077	C11 H13 O5	11	13	0	5	0	NA	NA	225.077	NA	NA	0	0	6797239	0	0	NA mean under detection limit
225.077	C11 H13 O5	11	13	0	5	0	225.077	NA	NA	NA	NA	6862379	0	0	0	0	NA mean under detection limit
225.077	C11 H13 O5	11	13	0	5	0	NA	225.077	NA	NA	NA	0	6926090	0	0	0	NA mean under detection limit
225.077	C11 H13 O5	11	13	0	5	0	NA	NA	NA	225.077	NA	0	0	0	26897584	0	NA mean under detection limit
225.113	C12 H17 O4	12	17	0	4	0	NA	NA	NA	225.113	NA	0	0	0	2611657	0	NA mean under detection limit
227.056	C10 H11 O6	10	11	0	6	0	NA	NA	227.056	NA	NA	0	0	2324167	0	0	NA mean under detection limit
227.056	C10 H11 O6	10	11	0	6	0	NA	227.056	NA	NA	NA	0	2499761	0	0	0	NA mean under detection limit
227.056	C10 H11 O6	10	11	0	6	0	NA	NA	NA	227.056	NA	0	0	0	6785014	0	NA mean under detection limit
227.092	C11 H15 O5	11	15	0	5	0	NA	NA	227.092	NA	NA	0	0	2232670	0	0	NA mean under detection limit
227.092	C11 H15 O5	11	15	0	5	0	NA	227.092	NA	NA	NA	0	2756937	0	0	0	NA mean under detection limit
227.092	C11 H15 O5	11	15	0	5	0	NA	NA	NA	227.092	NA	0	0	0	2619662	0	NA mean under detection limit
227.129	C12 H19 O4	12	19	0	4	0	NA	NA	NA	227.129	NA	0	0	0	4103718	0	NA mean under detection limit
229.035	C9 H9 O7	9	9	0	7	0	NA	NA	229.035	NA	NA	0	0	1899792	0	0	NA mean under detection limit
229.035	C9 H9 O7	9	9	0	7	0	NA	NA	NA	229.035	NA	0	0	0	13697773	0	NA mean under detection limit
229.072	C10 H13 O6	10	13	0	6	0	NA	NA	229.072	NA	NA	0	0	12108198	0	0	NA mean under detection limit
229.072	C10 H13 O6	10	13	0	6	0	229.072	NA	NA	NA	NA	3119700	0	0	0	0	NA mean under detection limit
229.072	C10 H13 O6	10	13	0	6	0	NA	229.072	NA	NA	NA	0	9870116	0	0	0	NA mean under detection limit
229.072	C10 H13 O6	10	13	0	6	0	NA	NA	NA	229.072	NA	0	0	0	4504579	0	NA mean under detection limit
231.015	C8 H7 O8	8	7	0	8	0	NA	NA	NA	231.015	NA	0	0	0	2397067	0	NA mean under detection limit
231.051	C9 H11 O7	9	11	0	7	0	NA	NA	NA	231.051	NA	0	0	0	2693024	0	NA mean under detection limit
231.087	C10 H15 O6	10	15	0	6	0	231.087	NA	NA	NA	NA	2499834	0	0	0	0	NA mean under detection limit
231.087	C10 H15 O6	10	15	0	6	0	NA	NA	NA	231.087	NA	0	0	0	4720565	0	NA mean under detection limit
233.03	C8 H9 O8	8	9	0	8	0	NA	NA	NA	233.03	NA	0	0	0	3095772	0	NA mean under detection limit
233.082	C13 H13 O4	13	13	0	4	0	NA	NA	NA	233.082	NA	0	0	0	1904375	0	NA mean under detection limit
235.098	C13 H15 O4	13	15	0	4	0	NA	235.098	NA	NA	NA	0	2769621	0	0	0	NA mean under detection limit
235.098	C13 H15 O4	13	15	0	4	0	NA	NA	NA	235.098	NA	0	0	0	4953053	0	NA mean under detection limit
235.134	C14 H19 O3	14	19	0	3	0	NA	NA	NA	235.134	NA	0	0	0	2154605	0	NA mean under detection limit
237.007	C7 H9 O7 S	7	9	0	7	1	NA	NA	NA	237.007	NA	0	0	0	2300976	0	NA mean under detection limit
237.007	C7 H9 O7 S	7	9	0	7	1	NA	NA	237.007	NA	NA	0	0	2357123	0	0	NA mean under detection limit
237.007	C7 H9 O7 S	7	9	0	7	1	NA	237.007	NA	NA	NA	0	2099880	0	0	0	NA mean under detection limit
237.038	C15 H9 O S	15	9	0	1	1	NA	NA	NA	237.038	NA	0	0	0	2373181	0	NA mean under detection limit
237.077	C12 H13 O5	12	13	0	5	0	NA	NA	237.077	NA	NA	0	0	3813280	0	0	NA mean under detection limit
237.077	C12 H13 O5	12	13	0	5	0	237.077	NA	NA	NA	NA	2640281	0	0	0	0	NA mean under detection limit
237.077	C12 H13 O5	12	13	0	5	0	NA	237.077	NA	NA	NA	0	3612485	0	0	0	NA mean under detection limit
237.077	C12 H13 O5	12	13	0	5	0	NA	NA	NA	237.077	NA	0	0	0	7099213	0	NA mean under detection limit
237.113	C13 H17 O4	13	17	0	4	0	NA	NA	237.113	NA	NA	0	0	2164399	0	0	NA mean under detection limit
237.113	C13 H17 O4	13	17	0	4	0	NA	237.113	NA	NA	NA	0	2227540	0	0	0	NA mean under detection limit
237.15	C14 H21 O3	14	21	0	3	0	NA	NA	NA	237.15	NA	0	0	0	3647339	0	NA mean under detection limit
239.056	C11 H11 O6	11	11	0	6	0	NA	NA	NA	239.056	NA	0	0	0	2302305	0	NA mean under detection limit
239.092	C12 H15 O5	12	15	0	5	0	NA	NA	239.093	NA	NA	0	0	4203208	0	0	NA mean under detection limit
239.092	C12 H15 O5	12	15	0	5	0	239.093	NA	NA	NA	NA	2400971	0	0	0	0	NA mean under detection limit
239.092	C12 H15 O5	12	15	0	5	0	NA	239.092	NA	NA	NA	0	5330028	0	0	0	NA mean under detection limit
239.092	C12 H15 O5	12	15	0	5	0	NA	NA	NA	239.093	NA	0	0	0	5458542	0	NA mean under detection limit
239.129	C13 H19 O4	13	19	0	4	0	NA	NA	NA	239.129	NA	0	0	0	2380668	0	NA mean under detection limit
241.035	C10 H9 O7	10	9	0	7	0	NA	NA	NA	241.035	NA	0	0	0	5038876	0	NA mean under detection limit
241.072	C11 H13 O6	11	13	0	6	0	NA	NA	241.072	NA	NA	0	0	2223505	0	0	NA mean under detection limit
241.072	C11 H13 O6	11	13	0	6	0	NA	NA	NA	241.072	NA	0	0	0	2605608	0	NA mean under detection limit
241.108	C12 H17 O5	12	17	0	5	0	NA	NA	NA	241.108	NA	0	0	0	6565172	0	NA mean under detection limit
243.051	C10 H11 O7	10	11	0	7	0	NA	NA	NA	243.051	NA	0	0	0	3587983	0	NA mean under detection limit
243.087	C11 H15 O6	11	15	0	6	0	NA	NA	243.087	NA	NA	0	0	5052444	0	0	NA mean under detection limit
243.087	C11 H15 O6	11	15	0	6	0	243.087	NA	NA	NA	NA	2791464	0	0	0	0	NA mean under detection limit
243.087	C11 H15 O6	11	15	0	6	0	NA	243.087	NA	NA	NA	0	3286707	0	0	0	NA mean under detection limit
243.087	C11 H15 O6	11	15	0	6	0	NA	NA	NA	243.087	NA	0	0	0	10731417	0	NA mean under detection limit
245.03	C9 H9 O8	9	9	0	8	0	NA	NA	NA	245.03	NA	0	0	0	4487079	0	NA mean under detection limit
245.067	C10 H13 O7	10	13	0	7	0	NA	NA	NA	245.067	NA	0	0	0	2793393	0	NA mean under detection limit
245.103	C11 H17 O6	11	17	0	6	0	NA	NA	245.103	NA	NA	0	0	2501213	0	0	NA mean under detection limit
245.103	C11 H17 O6	11	17	0	6	0	245.103	NA	NA	NA	NA	1927274	0	0	0	0	NA mean under detection limit
247.046	C9 H11 O8	9	11	0	8	0	NA	NA	NA	247.046	NA	0	0	0	82258816	0	NA mean under detection limit
249.113	C14 H17 O4	14	17	0	4	0	NA	NA	NA	NA	249.113	0	0	0	0	2182933	NA mean under detection limit
249.113	C14 H17 O4	14	17	0	4	0	NA	NA	NA	NA	249.113	0	0	0	0	1956991	NA mean under detection limit
251.056	C12 H11 O6	12	11	0	6	0	NA	NA	251.056	NA	NA	0	0	2136715	0	0	NA mean under detection limit
251.092	C13 H15 O5	13	15	0	5	0	NA	NA	251.093	NA	NA	0	0	3000210	0	0	NA mean under detection limit
251.092	C13 H15 O5	13	15	0	5	0	NA	251.093	NA	NA	NA	0	2541800	0	0	0	NA mean under detection limit
251.092	C13 H15 O5	13	15	0	5	0	NA	NA	NA	251.093	NA	0	0	0	4180061	0	NA mean under detection limit
252.999	C10 H5 O8	10	5	0	8	0	NA	NA	252.999	NA	NA	0	0	2059727	0	0	NA mean under detection limit
252.999	C10 H5 O8	10	5	0	8	0	252.999	NA	NA	NA	NA	2510779	0	0	0	0	NA mean under detection limit
253.072	C12 H13 O6	12	13	0	6	0	NA	253.072	NA	NA	NA	0	2807321	0	0	0	NA mean under detection limit
253.108	C13 H17 O5	13	17	0	5	0	NA	NA	253.108	NA	NA	0	0	3738848	0	0	NA mean under detection limit
253.108	C13 H17 O5	13	17	0	5	0	253.108	NA	NA	NA	NA	4065739	0	0	0	0	NA mean under detection limit
253.108	C13 H17 O5	13	17	0	5	0	NA	253.108	NA	NA	NA	0	4177950	0	0	0	NA mean under detection limit
253.108	C13 H17 O5	13	17	0	5	0	NA	NA	NA	253.108	NA	0	0	0	12215148	0	NA mean under detection limit
255.051	C11 H11 O7	11	11	0	7	0	NA	NA	NA	255.051	NA	0	0	0	2809660	0	NA mean under detection limit
255.087	C12 H15 O6	12	15	0	6	0	NA	NA	255.087	NA	NA	0	0	3139063	0	0	NA mean under detection limit
255.087	C12 H15 O6	12	15	0	6	0	255.087	NA	NA	NA	NA	2273491	0	0	0	0	NA mean under detection limit
255.087	C12 H15 O6	12	15	0	6	0	NA	255.087	NA	NA	NA	0	3513116	0	0	0	NA mean under detection limit
255.087	C12 H15 O6	12	15	0	6	0	NA	NA	NA	255.087	NA	0	0	0	3978304	0	NA mean under detection limit
257.067	C11 H13 O7	11	13	0	7	0	NA	NA	257.067	NA	NA	0	0	2983906	0	0	NA mean under detection limit
257.067	C11 H13 O7	11	13	0	7	0	257.067	NA	NA	NA	NA	2642604	0	0	0	0	NA mean under detection limit
257.067	C11 H13 O7	11	13	0	7	0	NA	257.067	NA	NA	NA	0	2287595	0	0	0	NA mean under detection limit
257.067	C11 H13 O7	11	13	0	7	0	NA	NA	NA	257.067	NA	0	0	0	10027234	0	NA mean under detection limit
257.103	C12 H17 O6	12	17	0	6	0	NA	NA	257.103	NA	NA	0	0	4914918	0	0	NA mean under detection limit
257.103	C12 H17 O6	12	17	0	6	0	257.103	NA	NA	NA	NA	2536112	0	0	0	0	NA mean under detection limit
257.103	C12 H17 O6	12	17	0	6	0	NA	257.103	NA	NA	NA	0	4274671	0	0	0	NA mean under detection limit
257.103	C12 H17 O6	12	17	0	6	0	NA	NA	NA	257.103	NA	0	0	0	1997285	0	NA mean under detection limit
259.046	C10 H11 O8	10	11	0	8	0	NA	NA	259.046	NA	NA	0	0	3312037	0	0	NA mean under detection limit
259.046	C10 H11 O8	10	11	0	8	0	259.046	NA	NA	NA	NA	2170202	0	0	0	0	NA mean under detection limit
259.046	C10 H11 O8	10	11	0	8	0	NA	NA	NA	259.046	NA	0	0	0	4904280	0	NA mean under detection limit
259.119	C12 H19 O6	12	19	0	6	0	NA	NA	259.119	NA	NA	0	0	2494892	0	0	NA mean under detection limit
259.119	C12 H19 O6	12	19	0	6	0	259.119	NA	NA	NA	NA	1943904	0	0	0	0	NA mean under detection limit
261.025	C9 H9 O9	9	9	0	9	0	NA	NA	NA	261.025	NA	0	0	0	1920422	0	NA mean under detection limit
261.062	C10 H13 O8	10	13	0	8	0	261.062	NA	NA	NA	NA	3913445	0	0	0	0	NA mean under detection limit
261.062	C10 H13 O8	10	13	0	8	0	NA	NA	NA	261.062	NA	0	0	0	10369448	0	NA mean under detection limit
263.092	C14 H15 O5	14	15	0	5	0	NA	263.092	NA	NA	NA	0	2189941	0	0	0	NA mean under detection limit
263.129	C15 H19 O4	15	19	0	4	0	NA	263.129	NA	NA	NA	0	2812278	0	0	0	NA mean under detection limit
263.129	C15 H19 O4	15	19	0	4	0	NA	NA	NA	263.129	NA	0	0	0	2540500	0	NA mean under detection limit
265.072	C13 H13 O6	13	13	0	6	0	NA	NA	265.072	NA	NA	0	0	2157871	0	0	NA mean under detection limit
265.108	C14 H17 O5	14	17	0	5	0	NA	NA	265.108	NA	NA	0	0	2645296	0	0	NA mean under detection limit
265.108	C14 H17 O5	14	17	0	5	0	265.108	NA	NA	NA	NA	2683286	0	0	0	0	NA mean under detection limit
265.108	C14 H17 O5	14	17	0	5	0	NA	265.108	NA	NA	NA	0	2965432	0	0	0	NA mean under detection limit
265.108	C14 H17 O5	14	17	0	5	0	NA	NA	NA	265.108	NA	0	0	0	5032415	0	NA mean under detection limit
265.148	C12 H25 O4 S	12	25	0	4	1	NA	NA	NA	NA	265.148	0	0	0	0	7576370	NA mean under detection limit
265.148	C12 H25 O4 S	12	25	0	4	1	NA	NA	NA	NA	265.148	0	0	0	0	5197208	NA mean under detection limit
265.148	C12 H25 O4 S	12	25	0	4	1	NA	NA	NA	NA	265.148	0	0	0	0	10570681	NA mean under detection limit
267.087	C13 H15 O6	13	15	0	6	0	NA	NA	267.087	NA	NA	0	0	2146430	0	0	NA mean under detection limit
267.087	C13 H15 O6	13	15	0	6	0	267.087	NA	NA	NA	NA	2467013	0	0	0	0	NA mean under detection limit
267.087	C13 H15 O6	13	15	0	6	0	NA	267.087	NA	NA	NA	0	2005730	0	0	0	NA mean under detection limit
267.087	C13 H15 O6	13	15	0	6	0	NA	NA	NA	267.087	NA	0	0	0	3970001	0	NA mean under detection limit
267.124	C14 H19 O5	14	19	0	5	0	NA	NA	267.124	NA	NA	0	0	2281855	0	0	NA mean under detection limit
267.124	C14 H19 O5	14	19	0	5	0	NA	267.124	NA	NA	NA	0	2511075	0	0	0	NA mean under detection limit
267.124	C14 H19 O5	14	19	0	5	0	NA	NA	NA	267.124	NA	0	0	0	2697681	0	NA mean under detection limit
269.067	C12 H13 O7	12	13	0	7	0	NA	NA	269.067	NA	NA	0	0	5536697	0	0	NA mean under detection limit
269.067	C12 H13 O7	12	13	0	7	0	269.067	NA	NA	NA	NA	7086559	0	0	0	0	NA mean under detection limit
269.067	C12 H13 O7	12	13	0	7	0	NA	269.067	NA	NA	NA	0	5293050	0	0	0	NA mean under detection limit
269.067	C12 H13 O7	12	13	0	7	0	NA	NA	NA	269.067	NA	0	0	0	19313072	0	NA mean under detection limit
269.103	C13 H17 O6	13	17	0	6	0	NA	NA	269.103	NA	NA	0	0	2801850	0	0	NA mean under detection limit
269.103	C13 H17 O6	13	17	0	6	0	NA	269.103	NA	NA	NA	0	2522874	0	0	0	NA mean under detection limit
269.103	C13 H17 O6	13	17	0	6	0	NA	NA	NA	269.103	NA	0	0	0	2123438	0	NA mean under detection limit
271.082	C12 H15 O7	12	15	0	7	0	NA	NA	271.082	NA	NA	0	0	4230120	0	0	NA mean under detection limit
271.082	C12 H15 O7	12	15	0	7	0	271.082	NA	NA	NA	NA	2588650	0	0	0	0	NA mean under detection limit
271.082	C12 H15 O7	12	15	0	7	0	NA	271.082	NA	NA	NA	0	4436994	0	0	0	NA mean under detection limit
271.082	C12 H15 O7	12	15	0	7	0	NA	NA	NA	271.082	NA	0	0	0	3314557	0	NA mean under detection limit
271.119	C13 H19 O6	13	19	0	6	0	NA	NA	271.119	NA	NA	0	0	2392040	0	0	NA mean under detection limit
271.119	C13 H19 O6	13	19	0	6	0	271.119	NA	NA	NA	NA	2028010	0	0	0	0	NA mean under detection limit
271.119	C13 H19 O6	13	19	0	6	0	NA	271.119	NA	NA	NA	0	2866690	0	0	0	NA mean under detection limit
271.119	C13 H19 O6	13	19	0	6	0	NA	NA	NA	271.119	NA	0	0	0	4310908	0	NA mean under detection limit
273.025	C10 H9 O9	10	9	0	9	0	NA	NA	NA	273.025	NA	0	0	0	2296641	0	NA mean under detection limit
273.062	C11 H13 O8	11	13	0	8	0	NA	NA	273.062	NA	NA	0	0	3598859	0	0	NA mean under detection limit
273.062	C11 H13 O8	11	13	0	8	0	273.062	NA	NA	NA	NA	4349928	0	0	0	0	NA mean under detection limit
273.062	C11 H13 O8	11	13	0	8	0	NA	273.062	NA	NA	NA	0	3487232	0	0	0	NA mean under detection limit
273.062	C11 H13 O8	11	13	0	8	0	NA	NA	NA	273.062	NA	0	0	0	3640640	0	NA mean under detection limit
275.077	C11 H15 O8	11	15	0	8	0	NA	NA	275.077	NA	NA	0	0	3939370	0	0	NA mean under detection limit
275.077	C11 H15 O8	11	15	0	8	0	275.077	NA	NA	NA	NA	6854111	0	0	0	0	NA mean under detection limit
275.077	C11 H15 O8	11	15	0	8	0	NA	275.077	NA	NA	NA	0	2708985	0	0	0	NA mean under detection limit
275.077	C11 H15 O8	11	15	0	8	0	NA	NA	NA	275.077	NA	0	0	0	10370301	0	NA mean under detection limit
275.129	C16 H19 O4	16	19	0	4	0	NA	275.129	NA	NA	NA	0	2511865	0	0	0	NA mean under detection limit
278.07	C10 H16 N O6 S	10	16	1	6	1	NA	278.07	NA	NA	NA	0	2154477	0	0	0	NA mean under detection limit
279.087	C14 H15 O6	14	15	0	6	0	NA	NA	279.087	NA	NA	0	0	2376042	0	0	NA mean under detection limit
279.087	C14 H15 O6	14	15	0	6	0	NA	279.087	NA	NA	NA	0	2446316	0	0	0	NA mean under detection limit
279.087	C14 H15 O6	14	15	0	6	0	NA	NA	NA	279.087	NA	0	0	0	2994296	0	NA mean under detection limit
281.067	C13 H13 O7	13	13	0	7	0	NA	NA	281.067	NA	NA	0	0	3093139	0	0	NA mean under detection limit
281.067	C13 H13 O7	13	13	0	7	0	281.067	NA	NA	NA	NA	3354566	0	0	0	0	NA mean under detection limit
281.067	C13 H13 O7	13	13	0	7	0	NA	281.067	NA	NA	NA	0	2912751	0	0	0	NA mean under detection limit
281.067	C13 H13 O7	13	13	0	7	0	NA	NA	NA	281.067	NA	0	0	0	4995650	0	NA mean under detection limit
281.103	C14 H17 O6	14	17	0	6	0	NA	NA	281.103	NA	NA	0	0	2885780	0	0	NA mean under detection limit
281.103	C14 H17 O6	14	17	0	6	0	281.103	NA	NA	NA	NA	2180806	0	0	0	0	NA mean under detection limit
281.103	C14 H17 O6	14	17	0	6	0	NA	281.103	NA	NA	NA	0	3241455	0	0	0	NA mean under detection limit
281.139	C15 H21 O5	15	21	0	5	0	NA	NA	NA	281.139	NA	0	0	0	3657792	0	NA mean under detection limit
283.082	C13 H15 O7	13	15	0	7	0	NA	NA	283.082	NA	NA	0	0	7951561	0	0	NA mean under detection limit
283.082	C13 H15 O7	13	15	0	7	0	283.082	NA	NA	NA	NA	3831244	0	0	0	0	NA mean under detection limit
283.082	C13 H15 O7	13	15	0	7	0	NA	283.082	NA	NA	NA	0	9575423	0	0	0	NA mean under detection limit
283.082	C13 H15 O7	13	15	0	7	0	NA	NA	NA	283.082	NA	0	0	0	4021784	0	NA mean under detection limit
283.119	C14 H19 O6	14	19	0	6	0	NA	NA	283.119	NA	NA	0	0	2184906	0	0	NA mean under detection limit
283.119	C14 H19 O6	14	19	0	6	0	NA	283.119	NA	NA	NA	0	3118080	0	0	0	NA mean under detection limit
283.119	C14 H19 O6	14	19	0	6	0	NA	NA	NA	283.119	NA	0	0	0	2264855	0	NA mean under detection limit
285.062	C12 H13 O8	12	13	0	8	0	NA	285.062	NA	NA	NA	0	1998369	0	0	0	NA mean under detection limit
285.062	C12 H13 O8	12	13	0	8	0	NA	NA	NA	285.062	NA	0	0	0	2089985	0	NA mean under detection limit
285.098	C13 H17 O7	13	17	0	7	0	NA	NA	285.098	NA	NA	0	0	2715408	0	0	NA mean under detection limit
285.098	C13 H17 O7	13	17	0	7	0	285.098	NA	NA	NA	NA	2346210	0	0	0	0	NA mean under detection limit
285.098	C13 H17 O7	13	17	0	7	0	NA	285.098	NA	NA	NA	0	2929186	0	0	0	NA mean under detection limit
285.098	C13 H17 O7	13	17	0	7	0	NA	NA	NA	285.098	NA	0	0	0	5870593	0	NA mean under detection limit
287.077	C12 H15 O8	12	15	0	8	0	NA	NA	287.077	NA	NA	0	0	4969835	0	0	NA mean under detection limit
287.077	C12 H15 O8	12	15	0	8	0	287.077	NA	NA	NA	NA	7382540	0	0	0	0	NA mean under detection limit
287.077	C12 H15 O8	12	15	0	8	0	NA	287.077	NA	NA	NA	0	4775513	0	0	0	NA mean under detection limit
287.077	C12 H15 O8	12	15	0	8	0	NA	NA	NA	287.077	NA	0	0	0	13172738	0	NA mean under detection limit
289.02	C10 H9 O10	10	9	0	10	0	NA	NA	NA	289.02	NA	0	0	0	2372895	0	NA mean under detection limit
289.057	C11 H13 O9	11	13	0	9	0	289.057	NA	NA	NA	NA	2392652	0	0	0	0	NA mean under detection limit
289.057	C11 H13 O9	11	13	0	9	0	NA	NA	NA	289.057	NA	0	0	0	3302943	0	NA mean under detection limit
289.093	C12 H17 O8	12	17	0	8	0	NA	NA	289.093	NA	NA	0	0	4852193	0	0	NA mean under detection limit
289.093	C12 H17 O8	12	17	0	8	0	289.093	NA	NA	NA	NA	2799182	0	0	0	0	NA mean under detection limit
289.093	C12 H17 O8	12	17	0	8	0	NA	289.093	NA	NA	NA	0	3806892	0	0	0	NA mean under detection limit
291.036	C10 H11 O10	10	11	0	10	0	NA	NA	NA	291.036	NA	0	0	0	8404061	0	NA mean under detection limit
291.049	C18 H11 O2 S	18	11	0	2	1	NA	NA	NA	291.049	NA	0	0	0	2769501	0	NA mean under detection limit
291.087	C15 H15 O6	15	15	0	6	0	NA	NA	291.087	NA	NA	0	0	2593908	0	0	NA mean under detection limit
291.124	C16 H19 O5	16	19	0	5	0	NA	291.124	NA	NA	NA	0	1945376	0	0	0	NA mean under detection limit
293.103	C15 H17 O6	15	17	0	6	0	NA	NA	293.103	NA	NA	0	0	2533414	0	0	NA mean under detection limit
293.103	C15 H17 O6	15	17	0	6	0	NA	293.103	NA	NA	NA	0	3387311	0	0	0	NA mean under detection limit
293.139	C16 H21 O5	16	21	0	5	0	NA	NA	NA	NA	293.139	0	0	0	0	2439874	NA mean under detection limit
293.179	C14 H29 O4 S	14	29	0	4	1	NA	NA	NA	NA	293.179	0	0	0	0	3538733	NA mean under detection limit
293.179	C14 H29 O4 S	14	29	0	4	1	NA	NA	NA	NA	293.179	0	0	0	0	3487669	NA mean under detection limit
295.082	C14 H15 O7	14	15	0	7	0	NA	NA	295.082	NA	NA	0	0	2177264	0	0	NA mean under detection limit
295.082	C14 H15 O7	14	15	0	7	0	NA	295.082	NA	NA	NA	0	2422876	0	0	0	NA mean under detection limit
295.082	C14 H15 O7	14	15	0	7	0	NA	NA	NA	295.082	NA	0	0	0	2692415	0	NA mean under detection limit
295.119	C15 H19 O6	15	19	0	6	0	NA	NA	NA	295.119	NA	0	0	0	2277441	0	NA mean under detection limit
297.029	C9 H13 O9 S	9	13	0	9	1	NA	NA	NA	297.029	NA	0	0	0	6433241	0	NA mean under detection limit
297.098	C14 H17 O7	14	17	0	7	0	NA	NA	297.098	NA	NA	0	0	5991642	0	0	NA mean under detection limit
297.098	C14 H17 O7	14	17	0	7	0	297.098	NA	NA	NA	NA	6160493	0	0	0	0	NA mean under detection limit
297.098	C14 H17 O7	14	17	0	7	0	NA	297.098	NA	NA	NA	0	4737833	0	0	0	NA mean under detection limit
297.098	C14 H17 O7	14	17	0	7	0	NA	NA	NA	297.098	NA	0	0	0	12667358	0	NA mean under detection limit
297.153	C16 H25 O3 S	16	25	0	3	1	NA	297.153	NA	NA	NA	0	2593070	0	0	0	NA mean under detection limit
299.077	C13 H15 O8	13	15	0	8	0	NA	NA	299.077	NA	NA	0	0	3912664	0	0	NA mean under detection limit
299.077	C13 H15 O8	13	15	0	8	0	299.077	NA	NA	NA	NA	3148085	0	0	0	0	NA mean under detection limit
299.077	C13 H15 O8	13	15	0	8	0	NA	299.077	NA	NA	NA	0	2931212	0	0	0	NA mean under detection limit
299.077	C13 H15 O8	13	15	0	8	0	NA	NA	NA	299.077	NA	0	0	0	4069528	0	NA mean under detection limit
299.114	C14 H19 O7	14	19	0	7	0	NA	NA	299.114	NA	NA	0	0	2876380	0	0	NA mean under detection limit
299.114	C14 H19 O7	14	19	0	7	0	NA	299.114	NA	NA	NA	0	2790929	0	0	0	NA mean under detection limit
301.057	C12 H13 O9	12	13	0	9	0	NA	NA	NA	301.057	NA	0	0	0	3576172	0	NA mean under detection limit
301.093	C13 H17 O8	13	17	0	8	0	NA	NA	301.093	NA	NA	0	0	10407666	0	0	NA mean under detection limit
301.093	C13 H17 O8	13	17	0	8	0	301.093	NA	NA	NA	NA	3010072	0	0	0	0	NA mean under detection limit
301.093	C13 H17 O8	13	17	0	8	0	NA	301.093	NA	NA	NA	0	12778766	0	0	0	NA mean under detection limit
301.093	C13 H17 O8	13	17	0	8	0	NA	NA	NA	301.093	NA	0	0	0	2362736	0	NA mean under detection limit
303.036	C11 H11 O10	11	11	0	10	0	NA	NA	NA	303.036	NA	0	0	0	20128858	0	NA mean under detection limit
303.036	C11 H11 O10	11	11	0	10	0	303.036	NA	NA	NA	NA	2980105	0	0	0	0	NA mean under detection limit
303.072	C12 H15 O9	12	15	0	9	0	NA	NA	303.072	NA	NA	0	0	2011422	0	0	NA mean under detection limit
303.072	C12 H15 O9	12	15	0	9	0	NA	NA	NA	303.072	NA	0	0	0	2370654	0	NA mean under detection limit
303.109	C13 H19 O8	13	19	0	8	0	NA	NA	303.109	NA	NA	0	0	5601315	0	0	NA mean under detection limit
303.109	C13 H19 O8	13	19	0	8	0	NA	303.109	NA	NA	NA	0	6902313	0	0	0	NA mean under detection limit
303.109	C13 H19 O8	13	19	0	8	0	NA	NA	NA	303.109	NA	0	0	0	2435427	0	NA mean under detection limit
305.051	C11 H13 O10	11	13	0	10	0	NA	NA	NA	305.051	NA	0	0	0	4213605	0	NA mean under detection limit
305.103	C16 H17 O6	16	17	0	6	0	NA	305.103	NA	NA	NA	0	2332504	0	0	0	NA mean under detection limit
307.119	C16 H19 O6	16	19	0	6	0	NA	NA	307.119	NA	NA	0	0	2160576	0	0	NA mean under detection limit
307.119	C16 H19 O6	16	19	0	6	0	307.119	NA	NA	NA	NA	2461252	0	0	0	0	NA mean under detection limit
307.119	C16 H19 O6	16	19	0	6	0	NA	307.119	NA	NA	NA	0	3291809	0	0	0	NA mean under detection limit
307.119	C16 H19 O6	16	19	0	6	0	NA	NA	NA	307.119	NA	0	0	0	2920591	0	NA mean under detection limit
309.029	C10 H13 O9 S	10	13	0	9	1	NA	NA	309.029	NA	NA	0	0	2029848	0	0	NA mean under detection limit
309.029	C10 H13 O9 S	10	13	0	9	1	NA	309.029	NA	NA	NA	0	1983979	0	0	0	NA mean under detection limit
309.098	C15 H17 O7	15	17	0	7	0	NA	NA	309.098	NA	NA	0	0	3222565	0	0	NA mean under detection limit
309.098	C15 H17 O7	15	17	0	7	0	309.098	NA	NA	NA	NA	3677815	0	0	0	0	NA mean under detection limit
309.098	C15 H17 O7	15	17	0	7	0	NA	309.098	NA	NA	NA	0	3353591	0	0	0	NA mean under detection limit
309.098	C15 H17 O7	15	17	0	7	0	NA	NA	NA	309.098	NA	0	0	0	3667906	0	NA mean under detection limit
309.174	C14 H29 O5 S	14	29	0	5	1	NA	NA	NA	NA	309.174	0	0	0	0	9012275	NA mean under detection limit
309.174	C14 H29 O5 S	14	29	0	5	1	NA	NA	NA	NA	309.174	0	0	0	0	5723779	NA mean under detection limit
309.174	C14 H29 O5 S	14	29	0	5	1	NA	NA	NA	NA	309.174	0	0	0	0	10746373	NA mean under detection limit
311.077	C14 H15 O8	14	15	0	8	0	NA	NA	311.077	NA	NA	0	0	1946010	0	0	NA mean under detection limit
311.114	C15 H19 O7	15	19	0	7	0	NA	NA	311.114	NA	NA	0	0	4426145	0	0	NA mean under detection limit
311.114	C15 H19 O7	15	19	0	7	0	311.114	NA	NA	NA	NA	2354626	0	0	0	0	NA mean under detection limit
311.114	C15 H19 O7	15	19	0	7	0	NA	311.114	NA	NA	NA	0	5294952	0	0	0	NA mean under detection limit
311.114	C15 H19 O7	15	19	0	7	0	NA	NA	NA	311.114	NA	0	0	0	3013902	0	NA mean under detection limit
311.169	C17 H27 O3 S	17	27	0	3	1	NA	NA	NA	NA	311.169	0	0	0	0	4127148	NA mean under detection limit
311.169	C17 H27 O3 S	17	27	0	3	1	NA	NA	NA	NA	311.169	0	0	0	0	2761675	NA mean under detection limit
311.169	C17 H27 O3 S	17	27	0	3	1	NA	NA	NA	NA	311.169	0	0	0	0	6486898	NA mean under detection limit
313.093	C14 H17 O8	14	17	0	8	0	NA	NA	313.093	NA	NA	0	0	3015973	0	0	NA mean under detection limit
313.093	C14 H17 O8	14	17	0	8	0	NA	313.093	NA	NA	NA	0	2741475	0	0	0	NA mean under detection limit
313.129	C15 H21 O7	15	21	0	7	0	NA	NA	NA	313.129	NA	0	0	0	2602094	0	NA mean under detection limit
315.072	C13 H15 O9	13	15	0	9	0	NA	NA	315.072	NA	NA	0	0	1984694	0	0	NA mean under detection limit
315.109	C14 H19 O8	14	19	0	8	0	NA	NA	315.109	NA	NA	0	0	2767549	0	0	NA mean under detection limit
315.109	C14 H19 O8	14	19	0	8	0	315.109	NA	NA	NA	NA	3542147	0	0	0	0	NA mean under detection limit
315.109	C14 H19 O8	14	19	0	8	0	NA	315.109	NA	NA	NA	0	4922999	0	0	0	NA mean under detection limit
315.109	C14 H19 O8	14	19	0	8	0	NA	NA	NA	315.109	NA	0	0	0	4425689	0	NA mean under detection limit
317.051	C12 H13 O10	12	13	0	10	0	NA	NA	317.051	NA	NA	0	0	5520979	0	0	NA mean under detection limit
317.051	C12 H13 O10	12	13	0	10	0	317.051	NA	NA	NA	NA	10201072	0	0	0	0	NA mean under detection limit
317.051	C12 H13 O10	12	13	0	10	0	NA	317.051	NA	NA	NA	0	2396682	0	0	0	NA mean under detection limit
317.051	C12 H13 O10	12	13	0	10	0	NA	NA	NA	317.051	NA	0	0	0	10997067	0	NA mean under detection limit
317.088	C13 H17 O9	13	17	0	9	0	NA	NA	317.088	NA	NA	0	0	2663002	0	0	NA mean under detection limit
317.088	C13 H17 O9	13	17	0	9	0	317.088	NA	NA	NA	NA	2377719	0	0	0	0	NA mean under detection limit
319.031	C11 H11 O11	11	11	0	11	0	NA	NA	NA	319.031	NA	0	0	0	2065618	0	NA mean under detection limit
319.067	C12 H15 O10	12	15	0	10	0	319.067	NA	NA	NA	NA	5284216	0	0	0	0	NA mean under detection limit
319.067	C12 H15 O10	12	15	0	10	0	NA	NA	NA	319.067	NA	0	0	0	7691994	0	NA mean under detection limit
319.119	C17 H19 O6	17	19	0	6	0	NA	NA	319.119	NA	NA	0	0	2089996	0	0	NA mean under detection limit
319.119	C17 H19 O6	17	19	0	6	0	319.119	NA	NA	NA	NA	2015618	0	0	0	0	NA mean under detection limit
319.119	C17 H19 O6	17	19	0	6	0	NA	319.119	NA	NA	NA	0	2687429	0	0	0	NA mean under detection limit
321.098	C16 H17 O7	16	17	0	7	0	NA	321.098	NA	NA	NA	0	2259322	0	0	0	NA mean under detection limit
321.134	C17 H21 O6	17	21	0	6	0	NA	NA	321.134	NA	NA	0	0	2211269	0	0	NA mean under detection limit
321.134	C17 H21 O6	17	21	0	6	0	NA	321.134	NA	NA	NA	0	2340227	0	0	0	NA mean under detection limit
323.077	C15 H15 O8	15	15	0	8	0	NA	NA	323.077	NA	NA	0	0	1976180	0	0	NA mean under detection limit
323.077	C15 H15 O8	15	15	0	8	0	NA	323.077	NA	NA	NA	0	2242619	0	0	0	NA mean under detection limit
323.114	C16 H19 O7	16	19	0	7	0	NA	NA	323.114	NA	NA	0	0	2899836	0	0	NA mean under detection limit
323.114	C16 H19 O7	16	19	0	7	0	323.114	NA	NA	NA	NA	2492849	0	0	0	0	NA mean under detection limit
323.114	C16 H19 O7	16	19	0	7	0	NA	323.114	NA	NA	NA	0	3640643	0	0	0	NA mean under detection limit
323.114	C16 H19 O7	16	19	0	7	0	NA	NA	NA	323.114	NA	0	0	0	2026783	0	NA mean under detection limit
325.093	C15 H17 O8	15	17	0	8	0	NA	325.093	NA	NA	NA	0	2333453	0	0	0	NA mean under detection limit
325.129	C16 H21 O7	16	21	0	7	0	NA	NA	325.129	NA	NA	0	0	2547522	0	0	NA mean under detection limit
325.129	C16 H21 O7	16	21	0	7	0	325.129	NA	NA	NA	NA	3273307	0	0	0	0	NA mean under detection limit
325.129	C16 H21 O7	16	21	0	7	0	NA	325.129	NA	NA	NA	0	3878166	0	0	0	NA mean under detection limit
325.129	C16 H21 O7	16	21	0	7	0	NA	NA	NA	325.129	NA	0	0	0	3204048	0	NA mean under detection limit
325.184	C18 H29 O3 S	18	29	0	3	1	NA	NA	NA	NA	325.184	0	0	0	0	4418894	NA mean under detection limit
325.184	C18 H29 O3 S	18	29	0	3	1	NA	NA	NA	NA	325.184	0	0	0	0	2771559	NA mean under detection limit
325.184	C18 H29 O3 S	18	29	0	3	1	NA	NA	NA	NA	325.184	0	0	0	0	8034083	NA mean under detection limit
327.109	C15 H19 O8	15	19	0	8	0	NA	NA	327.109	NA	NA	0	0	2560260	0	0	NA mean under detection limit
327.109	C15 H19 O8	15	19	0	8	0	NA	327.109	NA	NA	NA	0	3473129	0	0	0	NA mean under detection limit
329.051	C13 H13 O10	13	13	0	10	0	NA	NA	329.051	NA	NA	0	0	2156736	0	0	NA mean under detection limit
329.051	C13 H13 O10	13	13	0	10	0	329.051	NA	NA	NA	NA	3702194	0	0	0	0	NA mean under detection limit
329.051	C13 H13 O10	13	13	0	10	0	NA	329.051	NA	NA	NA	0	2024122	0	0	0	NA mean under detection limit
329.051	C13 H13 O10	13	13	0	10	0	NA	NA	NA	329.051	NA	0	0	0	2896690	0	NA mean under detection limit
329.088	C14 H17 O9	14	17	0	9	0	329.088	NA	NA	NA	NA	2547130	0	0	0	0	NA mean under detection limit
329.088	C14 H17 O9	14	17	0	9	0	NA	329.088	NA	NA	NA	0	2085059	0	0	0	NA mean under detection limit
329.124	C15 H21 O8	15	21	0	8	0	NA	NA	329.124	NA	NA	0	0	2121937	0	0	NA mean under detection limit
329.124	C15 H21 O8	15	21	0	8	0	329.124	NA	NA	NA	NA	2438595	0	0	0	0	NA mean under detection limit
329.124	C15 H21 O8	15	21	0	8	0	NA	329.124	NA	NA	NA	0	3474123	0	0	0	NA mean under detection limit
331.067	C13 H15 O10	13	15	0	10	0	NA	NA	331.067	NA	NA	0	0	6477455	0	0	NA mean under detection limit
331.067	C13 H15 O10	13	15	0	10	0	331.067	NA	NA	NA	NA	6049653	0	0	0	0	NA mean under detection limit
331.067	C13 H15 O10	13	15	0	10	0	NA	331.067	NA	NA	NA	0	6018211	0	0	0	NA mean under detection limit
331.067	C13 H15 O10	13	15	0	10	0	NA	NA	NA	331.067	NA	0	0	0	1988087	0	NA mean under detection limit
333.083	C13 H17 O10	13	17	0	10	0	NA	NA	333.083	NA	NA	0	0	2154077	0	0	NA mean under detection limit
333.083	C13 H17 O10	13	17	0	10	0	333.083	NA	NA	NA	NA	4286780	0	0	0	0	NA mean under detection limit
335.114	C17 H19 O7	17	19	0	7	0	NA	335.114	NA	NA	NA	0	2195076	0	0	0	NA mean under detection limit
335.15	C18 H23 O6	18	23	0	6	0	NA	335.15	NA	NA	NA	0	2000525	0	0	0	NA mean under detection limit
337.093	C16 H17 O8	16	17	0	8	0	NA	NA	337.093	NA	NA	0	0	2278384	0	0	NA mean under detection limit
337.093	C16 H17 O8	16	17	0	8	0	NA	337.093	NA	NA	NA	0	2054766	0	0	0	NA mean under detection limit
337.129	C17 H21 O7	17	21	0	7	0	NA	NA	337.129	NA	NA	0	0	2698232	0	0	NA mean under detection limit
337.129	C17 H21 O7	17	21	0	7	0	337.129	NA	NA	NA	NA	2037979	0	0	0	0	NA mean under detection limit
337.129	C17 H21 O7	17	21	0	7	0	NA	337.129	NA	NA	NA	0	3413111	0	0	0	NA mean under detection limit
337.205	C16 H33 O5 S	16	33	0	5	1	NA	NA	NA	NA	337.205	0	0	0	0	2637833	NA mean under detection limit
337.205	C16 H33 O5 S	16	33	0	5	1	NA	NA	NA	NA	337.205	0	0	0	0	2463469	NA mean under detection limit
337.205	C16 H33 O5 S	16	33	0	5	1	NA	NA	NA	NA	337.205	0	0	0	0	3169930	NA mean under detection limit
339.109	C16 H19 O8	16	19	0	8	0	NA	339.108	NA	NA	NA	0	2139746	0	0	0	NA mean under detection limit
339.145	C17 H23 O7	17	23	0	7	0	NA	NA	339.145	NA	NA	0	0	1990078	0	0	NA mean under detection limit
339.145	C17 H23 O7	17	23	0	7	0	NA	339.145	NA	NA	NA	0	2755691	0	0	0	NA mean under detection limit
339.2	C19 H31 O3 S	19	31	0	3	1	NA	NA	NA	NA	339.2	0	0	0	0	2120650	NA mean under detection limit
339.2	C19 H31 O3 S	19	31	0	3	1	NA	NA	NA	NA	339.2	0	0	0	0	2197177	NA mean under detection limit
339.2	C19 H31 O3 S	19	31	0	3	1	NA	NA	NA	NA	339.2	0	0	0	0	3902584	NA mean under detection limit
341.088	C15 H17 O9	15	17	0	9	0	NA	NA	341.088	NA	NA	0	0	3762030	0	0	NA mean under detection limit
341.088	C15 H17 O9	15	17	0	9	0	341.088	NA	NA	NA	NA	7777390	0	0	0	0	NA mean under detection limit
341.088	C15 H17 O9	15	17	0	9	0	NA	341.088	NA	NA	NA	0	4520524	0	0	0	NA mean under detection limit
341.088	C15 H17 O9	15	17	0	9	0	NA	NA	NA	341.088	NA	0	0	0	5284324	0	NA mean under detection limit
341.124	C16 H21 O8	16	21	0	8	0	NA	NA	341.124	NA	NA	0	0	2465910	0	0	NA mean under detection limit
341.124	C16 H21 O8	16	21	0	8	0	NA	341.124	NA	NA	NA	0	2985556	0	0	0	NA mean under detection limit
343.067	C14 H15 O10	14	15	0	10	0	NA	NA	343.067	NA	NA	0	0	3190046	0	0	NA mean under detection limit
343.067	C14 H15 O10	14	15	0	10	0	NA	343.067	NA	NA	NA	0	3299891	0	0	0	NA mean under detection limit
343.103	C15 H19 O9	15	19	0	9	0	343.103	NA	NA	NA	NA	2176320	0	0	0	0	NA mean under detection limit
343.103	C15 H19 O9	15	19	0	9	0	NA	343.103	NA	NA	NA	0	3414076	0	0	0	NA mean under detection limit
343.14	C16 H23 O8	16	23	0	8	0	NA	343.14	NA	NA	NA	0	2872901	0	0	0	NA mean under detection limit
345.046	C13 H13 O11	13	13	0	11	0	NA	NA	NA	345.046	NA	0	0	0	2663261	0	NA mean under detection limit
345.083	C14 H17 O10	14	17	0	10	0	NA	NA	345.083	NA	NA	0	0	4038350	0	0	NA mean under detection limit
345.083	C14 H17 O10	14	17	0	10	0	345.083	NA	NA	NA	NA	4088840	0	0	0	0	NA mean under detection limit
345.083	C14 H17 O10	14	17	0	10	0	NA	345.083	NA	NA	NA	0	5744161	0	0	0	NA mean under detection limit
347.026	C12 H11 O12	12	11	0	12	0	NA	NA	NA	347.026	NA	0	0	0	3467025	0	NA mean under detection limit
347.062	C13 H15 O11	13	15	0	11	0	347.062	NA	NA	NA	NA	5723598	0	0	0	0	NA mean under detection limit
347.062	C13 H15 O11	13	15	0	11	0	NA	NA	NA	347.062	NA	0	0	0	2594073	0	NA mean under detection limit
347.098	C14 H19 O10	14	19	0	10	0	NA	NA	347.098	NA	NA	0	0	2578036	0	0	NA mean under detection limit
347.098	C14 H19 O10	14	19	0	10	0	347.098	NA	NA	NA	NA	9275862	0	0	0	0	NA mean under detection limit
347.098	C14 H19 O10	14	19	0	10	0	NA	347.098	NA	NA	NA	0	3499530	0	0	0	NA mean under detection limit
347.098	C14 H19 O10	14	19	0	10	0	NA	NA	NA	347.098	NA	0	0	0	4177697	0	NA mean under detection limit
350.092	C13 H20 N O8 S	13	20	1	8	1	NA	NA	350.091	NA	NA	0	0	2220241	0	0	NA mean under detection limit
350.092	C13 H20 N O8 S	13	20	1	8	1	350.092	NA	NA	NA	NA	3589247	0	0	0	0	NA mean under detection limit
350.092	C13 H20 N O8 S	13	20	1	8	1	NA	350.091	NA	NA	NA	0	2454742	0	0	0	NA mean under detection limit
351.109	C17 H19 O8	17	19	0	8	0	NA	NA	351.109	NA	NA	0	0	2726810	0	0	NA mean under detection limit
351.109	C17 H19 O8	17	19	0	8	0	351.108	NA	NA	NA	NA	3610980	0	0	0	0	NA mean under detection limit
351.109	C17 H19 O8	17	19	0	8	0	NA	351.109	NA	NA	NA	0	2401735	0	0	0	NA mean under detection limit
353.088	C16 H17 O9	16	17	0	9	0	NA	NA	353.088	NA	NA	0	0	2235161	0	0	NA mean under detection limit
353.088	C16 H17 O9	16	17	0	9	0	353.088	NA	NA	NA	NA	4069153	0	0	0	0	NA mean under detection limit
353.088	C16 H17 O9	16	17	0	9	0	NA	353.088	NA	NA	NA	0	2944919	0	0	0	NA mean under detection limit
353.088	C16 H17 O9	16	17	0	9	0	NA	NA	NA	353.088	NA	0	0	0	1991198	0	NA mean under detection limit
353.2	C16 H33 O6 S	16	33	0	6	1	NA	NA	NA	NA	353.2	0	0	0	0	9236782	NA mean under detection limit
353.2	C16 H33 O6 S	16	33	0	6	1	NA	NA	NA	NA	353.2	0	0	0	0	8691514	NA mean under detection limit
353.2	C16 H33 O6 S	16	33	0	6	1	NA	NA	NA	NA	353.2	0	0	0	0	12849585	NA mean under detection limit
355.103	C16 H19 O9	16	19	0	9	0	NA	NA	355.103	NA	NA	0	0	4847254	0	0	NA mean under detection limit
355.103	C16 H19 O9	16	19	0	9	0	355.103	NA	NA	NA	NA	5147876	0	0	0	0	NA mean under detection limit
355.103	C16 H19 O9	16	19	0	9	0	NA	355.103	NA	NA	NA	0	7240556	0	0	0	NA mean under detection limit
357.083	C15 H17 O10	15	17	0	10	0	357.083	NA	NA	NA	NA	2249884	0	0	0	0	NA mean under detection limit
357.083	C15 H17 O10	15	17	0	10	0	NA	357.083	NA	NA	NA	0	2288435	0	0	0	NA mean under detection limit
357.119	C16 H21 O9	16	21	0	9	0	357.119	NA	NA	NA	NA	3222692	0	0	0	0	NA mean under detection limit
357.119	C16 H21 O9	16	21	0	9	0	NA	357.119	NA	NA	NA	0	3334459	0	0	0	NA mean under detection limit
359.098	C15 H19 O10	15	19	0	10	0	NA	NA	359.098	NA	NA	0	0	5408113	0	0	NA mean under detection limit
359.098	C15 H19 O10	15	19	0	10	0	359.098	NA	NA	NA	NA	12223578	0	0	0	0	NA mean under detection limit
359.098	C15 H19 O10	15	19	0	10	0	NA	359.098	NA	NA	NA	0	5885694	0	0	0	NA mean under detection limit
359.098	C15 H19 O10	15	19	0	10	0	NA	NA	NA	359.098	NA	0	0	0	5716197	0	NA mean under detection limit
361.041	C13 H13 O12	13	13	0	12	0	NA	NA	NA	361.041	NA	0	0	0	8221286	0	NA mean under detection limit
361.041	C13 H13 O12	13	13	0	12	0	361.041	NA	NA	NA	NA	3127813	0	0	0	0	NA mean under detection limit
361.078	C14 H17 O11	14	17	0	11	0	NA	NA	361.078	NA	NA	0	0	3178193	0	0	NA mean under detection limit
361.078	C14 H17 O11	14	17	0	11	0	361.078	NA	NA	NA	NA	6755854	0	0	0	0	NA mean under detection limit
361.078	C14 H17 O11	14	17	0	11	0	NA	361.078	NA	NA	NA	0	3464892	0	0	0	NA mean under detection limit
361.114	C15 H21 O10	15	21	0	10	0	NA	NA	361.114	NA	NA	0	0	4968152	0	0	NA mean under detection limit
361.114	C15 H21 O10	15	21	0	10	0	361.114	NA	NA	NA	NA	6685206	0	0	0	0	NA mean under detection limit
361.114	C15 H21 O10	15	21	0	10	0	NA	361.114	NA	NA	NA	0	4594884	0	0	0	NA mean under detection limit
363.057	C13 H15 O12	13	15	0	12	0	NA	NA	NA	363.057	NA	0	0	0	15512559	0	NA mean under detection limit
363.07	C21 H15 O4 S	21	15	0	4	1	363.07	NA	NA	NA	NA	2175682	0	0	0	0	NA mean under detection limit
363.109	C18 H19 O8	18	19	0	8	0	363.109	NA	NA	NA	NA	2832843	0	0	0	0	NA mean under detection limit
363.109	C18 H19 O8	18	19	0	8	0	NA	363.109	NA	NA	NA	0	2399874	0	0	0	NA mean under detection limit
364.107	C14 H22 N O8 S	14	22	1	8	1	NA	NA	364.107	NA	NA	0	0	2679520	0	0	NA mean under detection limit
364.107	C14 H22 N O8 S	14	22	1	8	1	NA	364.107	NA	NA	NA	0	4761439	0	0	0	NA mean under detection limit
365.124	C18 H21 O8	18	21	0	8	0	NA	NA	365.124	NA	NA	0	0	2624398	0	0	NA mean under detection limit
365.124	C18 H21 O8	18	21	0	8	0	NA	365.124	NA	NA	NA	0	3265600	0	0	0	NA mean under detection limit
366.123	C14 H24 N O8 S	14	24	1	8	1	NA	NA	366.123	NA	NA	0	0	2576439	0	0	NA mean under detection limit
366.123	C14 H24 N O8 S	14	24	1	8	1	NA	366.123	NA	NA	NA	0	6731036	0	0	0	NA mean under detection limit
367.103	C17 H19 O9	17	19	0	9	0	NA	NA	367.103	NA	NA	0	0	2145500	0	0	NA mean under detection limit
367.103	C17 H19 O9	17	19	0	9	0	367.103	NA	NA	NA	NA	2261298	0	0	0	0	NA mean under detection limit
367.103	C17 H19 O9	17	19	0	9	0	NA	367.103	NA	NA	NA	0	3644914	0	0	0	NA mean under detection limit
369.05	C12 H17 O11 S	12	17	0	11	1	NA	NA	NA	369.05	NA	0	0	0	16128098	0	NA mean under detection limit
369.119	C17 H21 O9	17	21	0	9	0	NA	NA	369.119	NA	NA	0	0	3972141	0	0	NA mean under detection limit
369.119	C17 H21 O9	17	21	0	9	0	369.119	NA	NA	NA	NA	7451880	0	0	0	0	NA mean under detection limit
369.119	C17 H21 O9	17	21	0	9	0	NA	369.119	NA	NA	NA	0	6842281	0	0	0	NA mean under detection limit
369.119	C17 H21 O9	17	21	0	9	0	NA	NA	NA	369.119	NA	0	0	0	4378735	0	NA mean under detection limit
371.098	C16 H19 O10	16	19	0	10	0	NA	NA	371.098	NA	NA	0	0	2438004	0	0	NA mean under detection limit
371.098	C16 H19 O10	16	19	0	10	0	371.098	NA	NA	NA	NA	3852949	0	0	0	0	NA mean under detection limit
371.098	C16 H19 O10	16	19	0	10	0	NA	371.098	NA	NA	NA	0	3385684	0	0	0	NA mean under detection limit
371.135	C17 H23 O9	17	23	0	9	0	NA	371.135	NA	NA	NA	0	2656604	0	0	0	NA mean under detection limit
373.041	C14 H13 O12	14	13	0	12	0	NA	NA	373.041	NA	NA	0	0	2538162	0	0	NA mean under detection limit
373.041	C14 H13 O12	14	13	0	12	0	373.041	NA	NA	NA	NA	6516793	0	0	0	0	NA mean under detection limit
373.041	C14 H13 O12	14	13	0	12	0	NA	373.041	NA	NA	NA	0	2117364	0	0	0	NA mean under detection limit
373.041	C14 H13 O12	14	13	0	12	0	NA	NA	NA	373.041	NA	0	0	0	3880771	0	NA mean under detection limit
373.078	C15 H17 O11	15	17	0	11	0	373.078	NA	NA	NA	NA	5884993	0	0	0	0	NA mean under detection limit
373.114	C16 H21 O10	16	21	0	10	0	NA	NA	373.114	NA	NA	0	0	8003262	0	0	NA mean under detection limit
373.114	C16 H21 O10	16	21	0	10	0	373.114	NA	NA	NA	NA	7342153	0	0	0	0	NA mean under detection limit
373.114	C16 H21 O10	16	21	0	10	0	NA	373.114	NA	NA	NA	0	10642179	0	0	0	NA mean under detection limit
375.057	C14 H15 O12	14	15	0	12	0	NA	NA	375.057	NA	NA	0	0	2039290	0	0	NA mean under detection limit
375.057	C14 H15 O12	14	15	0	12	0	375.057	NA	NA	NA	NA	6385132	0	0	0	0	NA mean under detection limit
375.057	C14 H15 O12	14	15	0	12	0	NA	NA	NA	375.057	NA	0	0	0	3338417	0	NA mean under detection limit
375.093	C15 H19 O11	15	19	0	11	0	NA	NA	375.093	NA	NA	0	0	3364864	0	0	NA mean under detection limit
375.093	C15 H19 O11	15	19	0	11	0	375.093	NA	NA	NA	NA	3815924	0	0	0	0	NA mean under detection limit
375.093	C15 H19 O11	15	19	0	11	0	NA	375.093	NA	NA	NA	0	4112552	0	0	0	NA mean under detection limit
375.13	C16 H23 O10	16	23	0	10	0	NA	NA	375.13	NA	NA	0	0	6987782	0	0	NA mean under detection limit
375.13	C16 H23 O10	16	23	0	10	0	375.13	NA	NA	NA	NA	3788284	0	0	0	0	NA mean under detection limit
375.13	C16 H23 O10	16	23	0	10	0	NA	375.13	NA	NA	NA	0	4905136	0	0	0	NA mean under detection limit
377.073	C14 H17 O12	14	17	0	12	0	377.073	NA	NA	NA	NA	2570143	0	0	0	0	NA mean under detection limit
377.073	C14 H17 O12	14	17	0	12	0	NA	NA	NA	377.073	NA	0	0	0	2969116	0	NA mean under detection limit
378.123	C15 H24 N O8 S	15	24	1	8	1	NA	378.123	NA	NA	NA	0	3492646	0	0	0	NA mean under detection limit
379.14	C19 H23 O8	19	23	0	8	0	379.14	NA	NA	NA	NA	2890588	0	0	0	0	NA mean under detection limit
379.14	C19 H23 O8	19	23	0	8	0	NA	379.14	NA	NA	NA	0	2591739	0	0	0	NA mean under detection limit
381.05	C13 H17 O11 S	13	17	0	11	1	381.05	NA	NA	NA	NA	3748600	0	0	0	0	NA mean under detection limit
381.05	C13 H17 O11 S	13	17	0	11	1	NA	381.05	NA	NA	NA	0	2654600	0	0	0	NA mean under detection limit
381.08	C21 H17 O5 S	21	17	0	5	1	381.08	NA	NA	NA	NA	2029311	0	0	0	0	NA mean under detection limit
381.119	C18 H21 O9	18	21	0	9	0	NA	NA	381.119	NA	NA	0	0	2484173	0	0	NA mean under detection limit
381.119	C18 H21 O9	18	21	0	9	0	381.119	NA	NA	NA	NA	4381447	0	0	0	0	NA mean under detection limit
381.119	C18 H21 O9	18	21	0	9	0	NA	381.119	NA	NA	NA	0	4421015	0	0	0	NA mean under detection limit
381.232	C18 H37 O6 S	18	37	0	6	1	NA	NA	NA	NA	381.232	0	0	0	0	2852319	NA mean under detection limit
381.232	C18 H37 O6 S	18	37	0	6	1	NA	NA	NA	NA	381.232	0	0	0	0	2649887	NA mean under detection limit
381.232	C18 H37 O6 S	18	37	0	6	1	NA	NA	NA	NA	381.232	0	0	0	0	3676590	NA mean under detection limit
382.081	C13 H20 N O10 S	13	20	1	10	1	382.081	NA	NA	NA	NA	3733463	0	0	0	0	NA mean under detection limit
382.081	C13 H20 N O10 S	13	20	1	10	1	NA	NA	NA	382.081	NA	0	0	0	3337619	0	NA mean under detection limit
383.135	C18 H23 O9	18	23	0	9	0	NA	NA	383.135	NA	NA	0	0	4063506	0	0	NA mean under detection limit
383.135	C18 H23 O9	18	23	0	9	0	383.135	NA	NA	NA	NA	4050106	0	0	0	0	NA mean under detection limit
383.135	C18 H23 O9	18	23	0	9	0	NA	383.135	NA	NA	NA	0	5622584	0	0	0	NA mean under detection limit
385.114	C17 H21 O10	17	21	0	10	0	NA	NA	385.114	NA	NA	0	0	2370642	0	0	NA mean under detection limit
385.114	C17 H21 O10	17	21	0	10	0	385.114	NA	NA	NA	NA	2921573	0	0	0	0	NA mean under detection limit
385.114	C17 H21 O10	17	21	0	10	0	NA	385.114	NA	NA	NA	0	4177103	0	0	0	NA mean under detection limit
385.15	C18 H25 O9	18	25	0	9	0	NA	385.15	NA	NA	NA	0	2661078	0	0	0	NA mean under detection limit
387.057	C15 H15 O12	15	15	0	12	0	NA	NA	387.057	NA	NA	0	0	4175758	0	0	NA mean under detection limit
387.057	C15 H15 O12	15	15	0	12	0	387.057	NA	NA	NA	NA	5387273	0	0	0	0	NA mean under detection limit
387.057	C15 H15 O12	15	15	0	12	0	NA	387.057	NA	NA	NA	0	3244636	0	0	0	NA mean under detection limit
387.093	C16 H19 O11	16	19	0	11	0	NA	NA	387.093	NA	NA	0	0	3852180	0	0	NA mean under detection limit
387.093	C16 H19 O11	16	19	0	11	0	387.093	NA	NA	NA	NA	4029457	0	0	0	0	NA mean under detection limit
387.093	C16 H19 O11	16	19	0	11	0	NA	387.093	NA	NA	NA	0	4138595	0	0	0	NA mean under detection limit
387.093	C16 H19 O11	16	19	0	11	0	NA	NA	NA	387.093	NA	0	0	0	2126841	0	NA mean under detection limit
387.13	C17 H23 O10	17	23	0	10	0	NA	NA	387.13	NA	NA	0	0	5204890	0	0	NA mean under detection limit
387.13	C17 H23 O10	17	23	0	10	0	387.13	NA	NA	NA	NA	5718041	0	0	0	0	NA mean under detection limit
387.13	C17 H23 O10	17	23	0	10	0	NA	387.13	NA	NA	NA	0	10767979	0	0	0	NA mean under detection limit
387.13	C17 H23 O10	17	23	0	10	0	NA	NA	NA	387.13	NA	0	0	0	2991360	0	NA mean under detection limit
389.073	C15 H17 O12	15	17	0	12	0	NA	NA	389.073	NA	NA	0	0	7557336	0	0	NA mean under detection limit
389.073	C15 H17 O12	15	17	0	12	0	389.073	NA	NA	NA	NA	17849788	0	0	0	0	NA mean under detection limit
389.073	C15 H17 O12	15	17	0	12	0	NA	389.073	NA	NA	NA	0	5713910	0	0	0	NA mean under detection limit
389.073	C15 H17 O12	15	17	0	12	0	NA	NA	NA	389.073	NA	0	0	0	5887566	0	NA mean under detection limit
389.109	C16 H21 O11	16	21	0	11	0	NA	NA	389.109	NA	NA	0	0	4190430	0	0	NA mean under detection limit
389.109	C16 H21 O11	16	21	0	11	0	389.109	NA	NA	NA	NA	5764549	0	0	0	0	NA mean under detection limit
389.109	C16 H21 O11	16	21	0	11	0	NA	389.109	NA	NA	NA	0	4889598	0	0	0	NA mean under detection limit
389.145	C17 H25 O10	17	25	0	10	0	NA	NA	389.145	NA	NA	0	0	6496484	0	0	NA mean under detection limit
389.145	C17 H25 O10	17	25	0	10	0	NA	389.145	NA	NA	NA	0	8036357	0	0	0	NA mean under detection limit
391.052	C14 H15 O13	14	15	0	13	0	NA	NA	NA	391.052	NA	0	0	0	14952352	0	NA mean under detection limit
391.088	C15 H19 O12	15	19	0	12	0	NA	NA	391.088	NA	NA	0	0	5530149	0	0	NA mean under detection limit
391.088	C15 H19 O12	15	19	0	12	0	391.088	NA	NA	NA	NA	62889844	0	0	0	0	NA mean under detection limit
391.088	C15 H19 O12	15	19	0	12	0	NA	391.088	NA	NA	NA	0	2904974	0	0	0	NA mean under detection limit
391.088	C15 H19 O12	15	19	0	12	0	NA	NA	NA	391.088	NA	0	0	0	23938982	0	NA mean under detection limit
391.101	C23 H19 O4 S	23	19	0	4	1	391.101	NA	NA	NA	NA	3095925	0	0	0	0	NA mean under detection limit
391.125	C16 H23 O11	16	23	0	11	0	391.125	NA	NA	NA	NA	2921338	0	0	0	0	NA mean under detection limit
391.14	C20 H23 O8	20	23	0	8	0	391.14	NA	NA	NA	NA	2578302	0	0	0	0	NA mean under detection limit
391.14	C20 H23 O8	20	23	0	8	0	NA	391.14	NA	NA	NA	0	2389401	0	0	0	NA mean under detection limit
393.155	C20 H25 O8	20	25	0	8	0	NA	393.155	NA	NA	NA	0	2451759	0	0	0	NA mean under detection limit
394.118	C15 H24 N O9 S	15	24	1	9	1	394.118	NA	NA	NA	NA	2076166	0	0	0	0	NA mean under detection limit
395.065	C14 H19 O11 S	14	19	0	11	1	NA	395.065	NA	NA	NA	0	2897071	0	0	0	NA mean under detection limit
395.098	C18 H19 O10	18	19	0	10	0	395.098	NA	NA	NA	NA	2736860	0	0	0	0	NA mean under detection limit
395.098	C18 H19 O10	18	19	0	10	0	NA	395.098	NA	NA	NA	0	2417334	0	0	0	NA mean under detection limit
395.135	C19 H23 O9	19	23	0	9	0	NA	NA	395.135	NA	NA	0	0	2626254	0	0	NA mean under detection limit
395.135	C19 H23 O9	19	23	0	9	0	395.135	NA	NA	NA	NA	3110628	0	0	0	0	NA mean under detection limit
395.135	C19 H23 O9	19	23	0	9	0	NA	395.135	NA	NA	NA	0	4986045	0	0	0	NA mean under detection limit
396.097	C14 H22 N O10 S	14	22	1	10	1	396.097	NA	NA	NA	NA	2052022	0	0	0	0	NA mean under detection limit
397.114	C18 H21 O10	18	21	0	10	0	NA	397.114	NA	NA	NA	0	2301513	0	0	0	NA mean under detection limit
397.15	C19 H25 O9	19	25	0	9	0	NA	NA	397.15	NA	NA	0	0	2746920	0	0	NA mean under detection limit
397.15	C19 H25 O9	19	25	0	9	0	397.15	NA	NA	NA	NA	2966685	0	0	0	0	NA mean under detection limit
397.15	C19 H25 O9	19	25	0	9	0	NA	397.15	NA	NA	NA	0	5094992	0	0	0	NA mean under detection limit
397.15	C19 H25 O9	19	25	0	9	0	NA	NA	NA	397.15	NA	0	0	0	2451370	0	NA mean under detection limit
397.227	C18 H37 O7 S	18	37	0	7	1	NA	NA	NA	NA	397.227	0	0	0	0	10079798	NA mean under detection limit
397.227	C18 H37 O7 S	18	37	0	7	1	NA	NA	NA	NA	397.227	0	0	0	0	8922286	NA mean under detection limit
397.227	C18 H37 O7 S	18	37	0	7	1	NA	NA	NA	NA	397.227	0	0	0	0	12981855	NA mean under detection limit
399.057	C16 H15 O12	16	15	0	12	0	NA	NA	NA	399.057	NA	0	0	0	2768620	0	NA mean under detection limit
399.093	C17 H19 O11	17	19	0	11	0	NA	NA	399.093	NA	NA	0	0	2149244	0	0	NA mean under detection limit
399.093	C17 H19 O11	17	19	0	11	0	399.093	NA	NA	NA	NA	2711624	0	0	0	0	NA mean under detection limit
399.13	C18 H23 O10	18	23	0	10	0	NA	NA	399.13	NA	NA	0	0	2569602	0	0	NA mean under detection limit
399.13	C18 H23 O10	18	23	0	10	0	399.13	NA	NA	NA	NA	3941968	0	0	0	0	NA mean under detection limit
399.13	C18 H23 O10	18	23	0	10	0	NA	399.13	NA	NA	NA	0	3877851	0	0	0	NA mean under detection limit
401.073	C16 H17 O12	16	17	0	12	0	NA	NA	401.073	NA	NA	0	0	3204316	0	0	NA mean under detection limit
401.073	C16 H17 O12	16	17	0	12	0	401.073	NA	NA	NA	NA	4985854	0	0	0	0	NA mean under detection limit
401.073	C16 H17 O12	16	17	0	12	0	NA	401.073	NA	NA	NA	0	3813726	0	0	0	NA mean under detection limit
401.073	C16 H17 O12	16	17	0	12	0	NA	NA	NA	401.072	NA	0	0	0	2201663	0	NA mean under detection limit
401.109	C17 H21 O11	17	21	0	11	0	NA	NA	401.109	NA	NA	0	0	4357346	0	0	NA mean under detection limit
401.109	C17 H21 O11	17	21	0	11	0	401.109	NA	NA	NA	NA	6592518	0	0	0	0	NA mean under detection limit
401.109	C17 H21 O11	17	21	0	11	0	NA	401.109	NA	NA	NA	0	4993381	0	0	0	NA mean under detection limit
401.109	C17 H21 O11	17	21	0	11	0	NA	NA	NA	401.109	NA	0	0	0	3044933	0	NA mean under detection limit
401.145	C18 H25 O10	18	25	0	10	0	NA	NA	401.145	NA	NA	0	0	4095209	0	0	NA mean under detection limit
401.145	C18 H25 O10	18	25	0	10	0	401.145	NA	NA	NA	NA	3118094	0	0	0	0	NA mean under detection limit
401.145	C18 H25 O10	18	25	0	10	0	NA	401.145	NA	NA	NA	0	6881644	0	0	0	NA mean under detection limit
403.088	C16 H19 O12	16	19	0	12	0	NA	NA	403.088	NA	NA	0	0	10125897	0	0	NA mean under detection limit
403.088	C16 H19 O12	16	19	0	12	0	403.088	NA	NA	NA	NA	8593852	0	0	0	0	NA mean under detection limit
403.088	C16 H19 O12	16	19	0	12	0	NA	403.088	NA	NA	NA	0	8735470	0	0	0	NA mean under detection limit
403.125	C17 H23 O11	17	23	0	11	0	NA	NA	403.125	NA	NA	0	0	3296848	0	0	NA mean under detection limit
403.125	C17 H23 O11	17	23	0	11	0	403.125	NA	NA	NA	NA	2514885	0	0	0	0	NA mean under detection limit
403.125	C17 H23 O11	17	23	0	11	0	NA	403.125	NA	NA	NA	0	3721973	0	0	0	NA mean under detection limit
405.067	C15 H17 O13	15	17	0	13	0	405.067	NA	NA	NA	NA	4177782	0	0	0	0	NA mean under detection limit
405.067	C15 H17 O13	15	17	0	13	0	NA	NA	NA	405.067	NA	0	0	0	3281120	0	NA mean under detection limit
405.104	C16 H21 O12	16	21	0	12	0	NA	NA	405.104	NA	NA	0	0	30024638	0	0	NA mean under detection limit
405.104	C16 H21 O12	16	21	0	12	0	405.104	NA	NA	NA	NA	24460158	0	0	0	0	NA mean under detection limit
405.104	C16 H21 O12	16	21	0	12	0	NA	405.104	NA	NA	NA	0	17218686	0	0	0	NA mean under detection limit
405.104	C16 H21 O12	16	21	0	12	0	NA	NA	NA	405.104	NA	0	0	0	3116774	0	NA mean under detection limit
405.14	C17 H25 O11	17	25	0	11	0	NA	NA	405.14	NA	NA	0	0	2159045	0	0	NA mean under detection limit
407.135	C20 H23 O9	20	23	0	9	0	NA	407.135	NA	NA	NA	0	2093071	0	0	0	NA mean under detection limit
408.097	C15 H22 N O10 S	15	22	1	10	1	408.097	NA	NA	NA	NA	2363933	0	0	0	0	NA mean under detection limit
408.133	C16 H26 N O9 S	16	26	1	9	1	NA	408.133	NA	NA	NA	0	3705557	0	0	0	NA mean under detection limit
409.081	C15 H21 O11 S	15	21	0	11	1	NA	409.081	NA	NA	NA	0	2403216	0	0	0	NA mean under detection limit
409.114	C19 H21 O10	19	21	0	10	0	NA	409.114	NA	NA	NA	0	2477975	0	0	0	NA mean under detection limit
409.15	C20 H25 O9	20	25	0	9	0	409.15	NA	NA	NA	NA	3009291	0	0	0	0	NA mean under detection limit
409.15	C20 H25 O9	20	25	0	9	0	NA	409.15	NA	NA	NA	0	2992030	0	0	0	NA mean under detection limit
411.093	C18 H19 O11	18	19	0	11	0	411.093	NA	NA	NA	NA	2578626	0	0	0	0	NA mean under detection limit
411.093	C18 H19 O11	18	19	0	11	0	NA	411.093	NA	NA	NA	0	2228511	0	0	0	NA mean under detection limit
411.13	C19 H23 O10	19	23	0	10	0	411.13	NA	NA	NA	NA	3035338	0	0	0	0	NA mean under detection limit
411.13	C19 H23 O10	19	23	0	10	0	NA	411.13	NA	NA	NA	0	3223846	0	0	0	NA mean under detection limit
411.166	C20 H27 O9	20	27	0	9	0	NA	411.166	NA	NA	NA	0	2869549	0	0	0	NA mean under detection limit
413.109	C18 H21 O11	18	21	0	11	0	NA	NA	413.109	NA	NA	0	0	4137424	0	0	NA mean under detection limit
413.109	C18 H21 O11	18	21	0	11	0	413.109	NA	NA	NA	NA	15299211	0	0	0	0	NA mean under detection limit
413.109	C18 H21 O11	18	21	0	11	0	NA	413.109	NA	NA	NA	0	4814511	0	0	0	NA mean under detection limit
413.109	C18 H21 O11	18	21	0	11	0	NA	NA	NA	413.109	NA	0	0	0	9201197	0	NA mean under detection limit
413.145	C19 H25 O10	19	25	0	10	0	NA	NA	413.145	NA	NA	0	0	2222551	0	0	NA mean under detection limit
413.145	C19 H25 O10	19	25	0	10	0	413.145	NA	NA	NA	NA	2541204	0	0	0	0	NA mean under detection limit
413.145	C19 H25 O10	19	25	0	10	0	NA	413.145	NA	NA	NA	0	4182710	0	0	0	NA mean under detection limit
415.088	C17 H19 O12	17	19	0	12	0	NA	NA	415.088	NA	NA	0	0	3788641	0	0	NA mean under detection limit
415.088	C17 H19 O12	17	19	0	12	0	415.088	NA	NA	NA	NA	4173902	0	0	0	0	NA mean under detection limit
415.088	C17 H19 O12	17	19	0	12	0	NA	415.088	NA	NA	NA	0	4577336	0	0	0	NA mean under detection limit
415.125	C18 H23 O11	18	23	0	11	0	NA	NA	415.125	NA	NA	0	0	4640617	0	0	NA mean under detection limit
415.125	C18 H23 O11	18	23	0	11	0	415.125	NA	NA	NA	NA	4626519	0	0	0	0	NA mean under detection limit
415.125	C18 H23 O11	18	23	0	11	0	NA	415.125	NA	NA	NA	0	5882943	0	0	0	NA mean under detection limit
415.161	C19 H27 O10	19	27	0	10	0	NA	NA	415.161	NA	NA	0	0	2361712	0	0	NA mean under detection limit
415.161	C19 H27 O10	19	27	0	10	0	NA	415.161	NA	NA	NA	0	5317703	0	0	0	NA mean under detection limit
417.031	C15 H13 O14	15	13	0	14	0	NA	NA	NA	417.031	NA	0	0	0	3127494	0	NA mean under detection limit
417.031	C15 H13 O14	15	13	0	14	0	417.031	NA	NA	NA	NA	3440138	0	0	0	0	NA mean under detection limit
417.067	C16 H17 O13	16	17	0	13	0	NA	NA	417.067	NA	NA	0	0	3508473	0	0	NA mean under detection limit
417.067	C16 H17 O13	16	17	0	13	0	417.067	NA	NA	NA	NA	7056915	0	0	0	0	NA mean under detection limit
417.067	C16 H17 O13	16	17	0	13	0	NA	417.068	NA	NA	NA	0	2097603	0	0	0	NA mean under detection limit
417.067	C16 H17 O13	16	17	0	13	0	NA	NA	NA	417.067	NA	0	0	0	6424781	0	NA mean under detection limit
417.104	C17 H21 O12	17	21	0	12	0	NA	NA	417.104	NA	NA	0	0	8238336	0	0	NA mean under detection limit
417.104	C17 H21 O12	17	21	0	12	0	417.104	NA	NA	NA	NA	11580955	0	0	0	0	NA mean under detection limit
417.104	C17 H21 O12	17	21	0	12	0	NA	417.104	NA	NA	NA	0	11236810	0	0	0	NA mean under detection limit
417.104	C17 H21 O12	17	21	0	12	0	NA	NA	NA	417.104	NA	0	0	0	2821331	0	NA mean under detection limit
417.14	C18 H25 O11	18	25	0	11	0	NA	NA	417.14	NA	NA	0	0	3492104	0	0	NA mean under detection limit
417.14	C18 H25 O11	18	25	0	11	0	417.14	NA	NA	NA	NA	2910243	0	0	0	0	NA mean under detection limit
417.14	C18 H25 O11	18	25	0	11	0	NA	417.14	NA	NA	NA	0	4104657	0	0	0	NA mean under detection limit
419.047	C15 H15 O14	15	15	0	14	0	NA	NA	NA	419.047	NA	0	0	0	6658590	0	NA mean under detection limit
419.083	C16 H19 O13	16	19	0	13	0	NA	NA	419.083	NA	NA	0	0	3733150	0	0	NA mean under detection limit
419.083	C16 H19 O13	16	19	0	13	0	419.083	NA	NA	NA	NA	12167137	0	0	0	0	NA mean under detection limit
419.083	C16 H19 O13	16	19	0	13	0	NA	419.083	NA	NA	NA	0	3877719	0	0	0	NA mean under detection limit
419.083	C16 H19 O13	16	19	0	13	0	NA	NA	NA	419.083	NA	0	0	0	4442660	0	NA mean under detection limit
419.12	C17 H23 O12	17	23	0	12	0	NA	NA	419.119	NA	NA	0	0	28987046	0	0	NA mean under detection limit
419.12	C17 H23 O12	17	23	0	12	0	419.12	NA	NA	NA	NA	31832040	0	0	0	0	NA mean under detection limit
419.12	C17 H23 O12	17	23	0	12	0	NA	419.12	NA	NA	NA	0	44676956	0	0	0	NA mean under detection limit
419.12	C17 H23 O12	17	23	0	12	0	NA	NA	NA	419.12	NA	0	0	0	8593962	0	NA mean under detection limit
419.171	C22 H27 O8	22	27	0	8	0	NA	419.171	NA	NA	NA	0	2227560	0	0	0	NA mean under detection limit
420.133	C17 H26 N O9 S	17	26	1	9	1	NA	420.133	NA	NA	NA	0	3131434	0	0	0	NA mean under detection limit
421.114	C20 H21 O10	20	21	0	10	0	NA	NA	421.114	NA	NA	0	0	2110029	0	0	NA mean under detection limit
421.114	C20 H21 O10	20	21	0	10	0	421.114	NA	NA	NA	NA	2452915	0	0	0	0	NA mean under detection limit
421.114	C20 H21 O10	20	21	0	10	0	NA	421.114	NA	NA	NA	0	2165487	0	0	0	NA mean under detection limit
421.15	C21 H25 O9	21	25	0	9	0	421.15	NA	NA	NA	NA	2111420	0	0	0	0	NA mean under detection limit
422.113	C16 H24 N O10 S	16	24	1	10	1	NA	NA	422.113	NA	NA	0	0	3161379	0	0	NA mean under detection limit
422.113	C16 H24 N O10 S	16	24	1	10	1	422.113	NA	NA	NA	NA	3145369	0	0	0	0	NA mean under detection limit
422.113	C16 H24 N O10 S	16	24	1	10	1	NA	422.113	NA	NA	NA	0	3481017	0	0	0	NA mean under detection limit
423.091	C23 H19 O6 S	23	19	0	6	1	423.091	NA	NA	NA	NA	2412923	0	0	0	0	NA mean under detection limit
423.13	C20 H23 O10	20	23	0	10	0	423.13	NA	NA	NA	NA	5797764	0	0	0	0	NA mean under detection limit
423.13	C20 H23 O10	20	23	0	10	0	NA	423.13	NA	NA	NA	0	3647111	0	0	0	NA mean under detection limit
423.13	C20 H23 O10	20	23	0	10	0	NA	NA	NA	423.13	NA	0	0	0	2869466	0	NA mean under detection limit
423.166	C21 H27 O9	21	27	0	9	0	NA	423.166	NA	NA	NA	0	2988687	0	0	0	NA mean under detection limit
424.128	C16 H26 N O10 S	16	26	1	10	1	NA	NA	424.128	NA	NA	0	0	2521815	0	0	NA mean under detection limit
424.128	C16 H26 N O10 S	16	26	1	10	1	424.128	NA	NA	NA	NA	2105962	0	0	0	0	NA mean under detection limit
424.128	C16 H26 N O10 S	16	26	1	10	1	NA	424.128	NA	NA	NA	0	2186578	0	0	0	NA mean under detection limit
425.109	C19 H21 O11	19	21	0	11	0	NA	NA	425.109	NA	NA	0	0	4123565	0	0	NA mean under detection limit
425.109	C19 H21 O11	19	21	0	11	0	425.109	NA	NA	NA	NA	6452557	0	0	0	0	NA mean under detection limit
425.109	C19 H21 O11	19	21	0	11	0	NA	425.109	NA	NA	NA	0	5191707	0	0	0	NA mean under detection limit
425.109	C19 H21 O11	19	21	0	11	0	NA	NA	NA	425.109	NA	0	0	0	2851887	0	NA mean under detection limit
425.145	C20 H25 O10	20	25	0	10	0	NA	425.145	NA	NA	NA	0	3962914	0	0	0	NA mean under detection limit
425.258	C20 H41 O7 S	20	41	0	7	1	NA	NA	NA	NA	425.258	0	0	0	0	2385358	NA mean under detection limit
425.258	C20 H41 O7 S	20	41	0	7	1	NA	NA	NA	NA	425.258	0	0	0	0	3402095	NA mean under detection limit
425.258	C20 H41 O7 S	20	41	0	7	1	NA	NA	NA	NA	425.258	0	0	0	0	3072057	NA mean under detection limit
427.052	C17 H15 O13	17	15	0	13	0	427.052	NA	NA	NA	NA	2460942	0	0	0	0	NA mean under detection limit
427.125	C19 H23 O11	19	23	0	11	0	NA	NA	427.125	NA	NA	0	0	10597738	0	0	NA mean under detection limit
427.125	C19 H23 O11	19	23	0	11	0	427.125	NA	NA	NA	NA	9215775	0	0	0	0	NA mean under detection limit
427.125	C19 H23 O11	19	23	0	11	0	NA	427.125	NA	NA	NA	0	13340088	0	0	0	NA mean under detection limit
427.125	C19 H23 O11	19	23	0	11	0	NA	NA	NA	427.125	NA	0	0	0	2986380	0	NA mean under detection limit
427.161	C20 H27 O10	20	27	0	10	0	NA	427.161	NA	NA	NA	0	4259264	0	0	0	NA mean under detection limit
429.067	C17 H17 O13	17	17	0	13	0	429.067	NA	NA	NA	NA	2202337	0	0	0	0	NA mean under detection limit
429.104	C18 H21 O12	18	21	0	12	0	NA	NA	429.104	NA	NA	0	0	3300132	0	0	NA mean under detection limit
429.104	C18 H21 O12	18	21	0	12	0	429.104	NA	NA	NA	NA	4665577	0	0	0	0	NA mean under detection limit
429.104	C18 H21 O12	18	21	0	12	0	NA	429.104	NA	NA	NA	0	4538194	0	0	0	NA mean under detection limit
429.14	C19 H25 O11	19	25	0	11	0	NA	NA	429.14	NA	NA	0	0	3968812	0	0	NA mean under detection limit
429.14	C19 H25 O11	19	25	0	11	0	429.14	NA	NA	NA	NA	4547826	0	0	0	0	NA mean under detection limit
429.14	C19 H25 O11	19	25	0	11	0	NA	429.14	NA	NA	NA	0	7104346	0	0	0	NA mean under detection limit
429.177	C20 H29 O10	20	29	0	10	0	NA	429.177	NA	NA	NA	0	2988897	0	0	0	NA mean under detection limit
431.047	C16 H15 O14	16	15	0	14	0	431.047	NA	NA	NA	NA	3935915	0	0	0	0	NA mean under detection limit
431.083	C17 H19 O13	17	19	0	13	0	NA	NA	431.083	NA	NA	0	0	4269282	0	0	NA mean under detection limit
431.083	C17 H19 O13	17	19	0	13	0	431.083	NA	NA	NA	NA	4974260	0	0	0	0	NA mean under detection limit
431.083	C17 H19 O13	17	19	0	13	0	NA	431.083	NA	NA	NA	0	3349743	0	0	0	NA mean under detection limit
431.12	C18 H23 O12	18	23	0	12	0	NA	NA	431.119	NA	NA	0	0	7946475	0	0	NA mean under detection limit
431.12	C18 H23 O12	18	23	0	12	0	431.119	NA	NA	NA	NA	22643388	0	0	0	0	NA mean under detection limit
431.12	C18 H23 O12	18	23	0	12	0	NA	431.12	NA	NA	NA	0	8517879	0	0	0	NA mean under detection limit
431.12	C18 H23 O12	18	23	0	12	0	NA	NA	NA	431.12	NA	0	0	0	10691142	0	NA mean under detection limit
431.156	C19 H27 O11	19	27	0	11	0	NA	431.156	NA	NA	NA	0	2598142	0	0	0	NA mean under detection limit
433.062	C16 H17 O14	16	17	0	14	0	NA	NA	433.062	NA	NA	0	0	3154598	0	0	NA mean under detection limit
433.062	C16 H17 O14	16	17	0	14	0	433.062	NA	NA	NA	NA	16139391	0	0	0	0	NA mean under detection limit
433.062	C16 H17 O14	16	17	0	14	0	NA	433.062	NA	NA	NA	0	2634896	0	0	0	NA mean under detection limit
433.062	C16 H17 O14	16	17	0	14	0	NA	NA	NA	433.062	NA	0	0	0	10052508	0	NA mean under detection limit
433.099	C17 H21 O13	17	21	0	13	0	NA	NA	433.099	NA	NA	0	0	6324910	0	0	NA mean under detection limit
433.099	C17 H21 O13	17	21	0	13	0	433.099	NA	NA	NA	NA	10790023	0	0	0	0	NA mean under detection limit
433.099	C17 H21 O13	17	21	0	13	0	NA	433.099	NA	NA	NA	0	6447768	0	0	0	NA mean under detection limit
433.135	C18 H25 O12	18	25	0	12	0	NA	NA	433.135	NA	NA	0	0	14211766	0	0	NA mean under detection limit
433.135	C18 H25 O12	18	25	0	12	0	433.135	NA	NA	NA	NA	12227728	0	0	0	0	NA mean under detection limit
433.135	C18 H25 O12	18	25	0	12	0	NA	433.135	NA	NA	NA	0	21385888	0	0	0	NA mean under detection limit
435.06	C16 H19 O12 S	16	19	0	12	1	435.06	NA	NA	NA	NA	2728527	0	0	0	0	NA mean under detection limit
435.078	C16 H19 O14	16	19	0	14	0	NA	NA	435.078	NA	NA	0	0	2628214	0	0	NA mean under detection limit
435.078	C16 H19 O14	16	19	0	14	0	435.078	NA	NA	NA	NA	26814034	0	0	0	0	NA mean under detection limit
435.078	C16 H19 O14	16	19	0	14	0	NA	435.078	NA	NA	NA	0	4075582	0	0	0	NA mean under detection limit
435.078	C16 H19 O14	16	19	0	14	0	NA	NA	NA	435.078	NA	0	0	0	48346368	0	NA mean under detection limit
435.091	C24 H19 O6 S	24	19	0	6	1	435.091	NA	NA	NA	NA	2633814	0	0	0	0	NA mean under detection limit
435.13	C21 H23 O10	21	23	0	10	0	435.13	NA	NA	NA	NA	2516575	0	0	0	0	NA mean under detection limit
436.128	C17 H26 N O10 S	17	26	1	10	1	NA	NA	436.128	NA	NA	0	0	3174250	0	0	NA mean under detection limit
436.128	C17 H26 N O10 S	17	26	1	10	1	436.128	NA	NA	NA	NA	2374471	0	0	0	0	NA mean under detection limit
436.128	C17 H26 N O10 S	17	26	1	10	1	NA	436.128	NA	NA	NA	0	4696351	0	0	0	NA mean under detection limit
437.145	C21 H25 O10	21	25	0	10	0	NA	NA	437.145	NA	NA	0	0	2186327	0	0	NA mean under detection limit
437.145	C21 H25 O10	21	25	0	10	0	437.145	NA	NA	NA	NA	2482739	0	0	0	0	NA mean under detection limit
437.145	C21 H25 O10	21	25	0	10	0	NA	437.145	NA	NA	NA	0	3541499	0	0	0	NA mean under detection limit
438.144	C17 H28 N O10 S	17	28	1	10	1	NA	438.144	NA	NA	NA	0	3964628	0	0	0	NA mean under detection limit
439.055	C15 H19 O13 S	15	19	0	13	1	439.055	NA	NA	NA	NA	3666414	0	0	0	0	NA mean under detection limit
439.055	C15 H19 O13 S	15	19	0	13	1	NA	NA	NA	439.055	NA	0	0	0	2365386	0	NA mean under detection limit
439.088	C19 H19 O12	19	19	0	12	0	439.088	NA	NA	NA	NA	2433014	0	0	0	0	NA mean under detection limit
439.125	C20 H23 O11	20	23	0	11	0	NA	NA	439.125	NA	NA	0	0	2399271	0	0	NA mean under detection limit
439.125	C20 H23 O11	20	23	0	11	0	439.125	NA	NA	NA	NA	3114494	0	0	0	0	NA mean under detection limit
439.125	C20 H23 O11	20	23	0	11	0	NA	439.125	NA	NA	NA	0	4764586	0	0	0	NA mean under detection limit
439.161	C21 H27 O10	21	27	0	10	0	NA	439.161	NA	NA	NA	0	2188210	0	0	0	NA mean under detection limit
441.071	C15 H21 O13 S	15	21	0	13	1	441.071	NA	NA	NA	NA	41479108	0	0	0	0	NA mean under detection limit
441.071	C15 H21 O13 S	15	21	0	13	1	NA	NA	NA	441.071	NA	0	0	0	28637494	0	NA mean under detection limit
441.14	C20 H25 O11	20	25	0	11	0	NA	NA	441.14	NA	NA	0	0	6486533	0	0	NA mean under detection limit
441.14	C20 H25 O11	20	25	0	11	0	441.14	NA	NA	NA	NA	7267282	0	0	0	0	NA mean under detection limit
441.14	C20 H25 O11	20	25	0	11	0	NA	441.14	NA	NA	NA	0	11827559	0	0	0	NA mean under detection limit
441.14	C20 H25 O11	20	25	0	11	0	NA	NA	NA	441.14	NA	0	0	0	4695363	0	NA mean under detection limit
441.253	C20 H41 O8 S	20	41	0	8	1	NA	NA	NA	NA	441.253	0	0	0	0	6814239	NA mean under detection limit
441.253	C20 H41 O8 S	20	41	0	8	1	NA	NA	NA	NA	441.253	0	0	0	0	6618093	NA mean under detection limit
441.253	C20 H41 O8 S	20	41	0	8	1	NA	NA	NA	NA	441.253	0	0	0	0	8403328	NA mean under detection limit
443.083	C18 H19 O13	18	19	0	13	0	443.083	NA	NA	NA	NA	3895701	0	0	0	0	NA mean under detection limit
443.12	C19 H23 O12	19	23	0	12	0	NA	NA	443.12	NA	NA	0	0	4036573	0	0	NA mean under detection limit
443.12	C19 H23 O12	19	23	0	12	0	443.12	NA	NA	NA	NA	6684061	0	0	0	0	NA mean under detection limit
443.12	C19 H23 O12	19	23	0	12	0	NA	443.12	NA	NA	NA	0	4791074	0	0	0	NA mean under detection limit
443.12	C19 H23 O12	19	23	0	12	0	NA	NA	NA	443.12	NA	0	0	0	2560172	0	NA mean under detection limit
443.156	C20 H27 O11	20	27	0	11	0	NA	443.156	NA	NA	NA	0	4082474	0	0	0	NA mean under detection limit
445.062	C17 H17 O14	17	17	0	14	0	NA	NA	445.062	NA	NA	0	0	6520240	0	0	NA mean under detection limit
445.062	C17 H17 O14	17	17	0	14	0	445.062	NA	NA	NA	NA	15785823	0	0	0	0	NA mean under detection limit
445.062	C17 H17 O14	17	17	0	14	0	NA	445.062	NA	NA	NA	0	5261530	0	0	0	NA mean under detection limit
445.062	C17 H17 O14	17	17	0	14	0	NA	NA	NA	445.062	NA	0	0	0	6239250	0	NA mean under detection limit
445.099	C18 H21 O13	18	21	0	13	0	NA	NA	445.099	NA	NA	0	0	4588985	0	0	NA mean under detection limit
445.099	C18 H21 O13	18	21	0	13	0	445.099	NA	NA	NA	NA	6446952	0	0	0	0	NA mean under detection limit
445.099	C18 H21 O13	18	21	0	13	0	NA	445.099	NA	NA	NA	0	4408546	0	0	0	NA mean under detection limit
445.135	C19 H25 O12	19	25	0	12	0	NA	NA	445.135	NA	NA	0	0	19523010	0	0	NA mean under detection limit
445.135	C19 H25 O12	19	25	0	12	0	445.135	NA	NA	NA	NA	15482736	0	0	0	0	NA mean under detection limit
445.135	C19 H25 O12	19	25	0	12	0	NA	445.135	NA	NA	NA	0	18717930	0	0	0	NA mean under detection limit
445.135	C19 H25 O12	19	25	0	12	0	NA	NA	NA	445.135	NA	0	0	0	2484255	0	NA mean under detection limit
447.078	C17 H19 O14	17	19	0	14	0	NA	NA	447.078	NA	NA	0	0	13047703	0	0	NA mean under detection limit
447.078	C17 H19 O14	17	19	0	14	0	447.078	NA	NA	NA	NA	24400178	0	0	0	0	NA mean under detection limit
447.078	C17 H19 O14	17	19	0	14	0	NA	447.078	NA	NA	NA	0	10292905	0	0	0	NA mean under detection limit
447.078	C17 H19 O14	17	19	0	14	0	NA	NA	NA	447.078	NA	0	0	0	7318919	0	NA mean under detection limit
447.114	C18 H23 O13	18	23	0	13	0	NA	NA	447.114	NA	NA	0	0	6141857	0	0	NA mean under detection limit
447.114	C18 H23 O13	18	23	0	13	0	447.114	NA	NA	NA	NA	5703994	0	0	0	0	NA mean under detection limit
447.114	C18 H23 O13	18	23	0	13	0	NA	447.114	NA	NA	NA	0	8130225	0	0	0	NA mean under detection limit
447.151	C19 H27 O12	19	27	0	12	0	NA	NA	447.151	NA	NA	0	0	18638762	0	0	NA mean under detection limit
447.151	C19 H27 O12	19	27	0	12	0	447.151	NA	NA	NA	NA	4875587	0	0	0	0	NA mean under detection limit
447.151	C19 H27 O12	19	27	0	12	0	NA	447.151	NA	NA	NA	0	17481402	0	0	0	NA mean under detection limit
448.128	C18 H26 N O10 S	18	26	1	10	1	NA	NA	448.128	NA	NA	0	0	2460823	0	0	NA mean under detection limit
448.128	C18 H26 N O10 S	18	26	1	10	1	NA	448.128	NA	NA	NA	0	2466717	0	0	0	NA mean under detection limit
449.094	C17 H21 O14	17	21	0	14	0	NA	NA	449.094	NA	NA	0	0	7065987	0	0	NA mean under detection limit
449.094	C17 H21 O14	17	21	0	14	0	449.094	NA	NA	NA	NA	16253700	0	0	0	0	NA mean under detection limit
449.094	C17 H21 O14	17	21	0	14	0	NA	449.094	NA	NA	NA	0	10291327	0	0	0	NA mean under detection limit
449.094	C17 H21 O14	17	21	0	14	0	NA	NA	NA	449.094	NA	0	0	0	5945088	0	NA mean under detection limit
449.106	C25 H21 O6 S	25	21	0	6	1	NA	NA	449.107	NA	NA	0	0	2386822	0	0	NA mean under detection limit
449.106	C25 H21 O6 S	25	21	0	6	1	449.106	NA	NA	NA	NA	2383111	0	0	0	0	NA mean under detection limit
449.106	C25 H21 O6 S	25	21	0	6	1	NA	449.107	NA	NA	NA	0	2910338	0	0	0	NA mean under detection limit
449.13	C18 H25 O13	18	25	0	13	0	449.13	NA	NA	NA	NA	3087116	0	0	0	0	NA mean under detection limit
449.145	C22 H25 O10	22	25	0	10	0	NA	449.145	NA	NA	NA	0	2209419	0	0	0	NA mean under detection limit
450.144	C18 H28 N O10 S	18	28	1	10	1	NA	450.144	NA	NA	NA	0	3338615	0	0	0	NA mean under detection limit
451.125	C21 H23 O11	21	23	0	11	0	NA	451.125	NA	NA	NA	0	2210400	0	0	0	NA mean under detection limit
451.161	C22 H27 O10	22	27	0	10	0	451.161	NA	NA	NA	NA	3289312	0	0	0	0	NA mean under detection limit
451.161	C22 H27 O10	22	27	0	10	0	NA	451.161	NA	NA	NA	0	3818088	0	0	0	NA mean under detection limit
452.087	C16 H22 N O12 S	16	22	1	12	1	452.087	NA	NA	NA	NA	3251638	0	0	0	0	NA mean under detection limit
452.123	C17 H26 N O11 S	17	26	1	11	1	452.123	NA	NA	NA	NA	4369854	0	0	0	0	NA mean under detection limit
452.123	C17 H26 N O11 S	17	26	1	11	1	NA	452.123	NA	NA	NA	0	2549583	0	0	0	NA mean under detection limit
452.16	C18 H30 N O10 S	18	30	1	10	1	NA	NA	452.16	NA	NA	0	0	2955380	0	0	NA mean under detection limit
452.16	C18 H30 N O10 S	18	30	1	10	1	NA	452.16	NA	NA	NA	0	6054744	0	0	0	NA mean under detection limit
453.071	C16 H21 O13 S	16	21	0	13	1	NA	NA	453.071	NA	NA	0	0	6079829	0	0	NA mean under detection limit
453.071	C16 H21 O13 S	16	21	0	13	1	453.071	NA	NA	NA	NA	10245784	0	0	0	0	NA mean under detection limit
453.071	C16 H21 O13 S	16	21	0	13	1	NA	453.071	NA	NA	NA	0	5809204	0	0	0	NA mean under detection limit
453.101	C24 H21 O7 S	24	21	0	7	1	453.101	NA	NA	NA	NA	2807967	0	0	0	0	NA mean under detection limit
453.104	C20 H21 O12	20	21	0	12	0	NA	NA	453.104	NA	NA	0	0	2239325	0	0	NA mean under detection limit
453.104	C20 H21 O12	20	21	0	12	0	453.104	NA	NA	NA	NA	2767007	0	0	0	0	NA mean under detection limit
453.104	C20 H21 O12	20	21	0	12	0	NA	453.104	NA	NA	NA	0	2855996	0	0	0	NA mean under detection limit
453.14	C21 H25 O11	21	25	0	11	0	NA	NA	453.14	NA	NA	0	0	4265318	0	0	NA mean under detection limit
453.14	C21 H25 O11	21	25	0	11	0	453.14	NA	NA	NA	NA	6297256	0	0	0	0	NA mean under detection limit
453.14	C21 H25 O11	21	25	0	11	0	NA	453.14	NA	NA	NA	0	6927429	0	0	0	NA mean under detection limit
453.14	C21 H25 O11	21	25	0	11	0	NA	NA	NA	453.14	NA	0	0	0	2936319	0	NA mean under detection limit
453.177	C22 H29 O10	22	29	0	10	0	NA	453.177	NA	NA	NA	0	2451533	0	0	0	NA mean under detection limit
454.102	C16 H24 N O12 S	16	24	1	12	1	454.102	NA	NA	NA	NA	5033861	0	0	0	0	NA mean under detection limit
455.05	C15 H19 O14 S	15	19	0	14	1	455.05	NA	NA	NA	NA	2461790	0	0	0	0	NA mean under detection limit
455.086	C16 H23 O13 S	16	23	0	13	1	NA	NA	455.086	NA	NA	0	0	27225928	0	0	NA mean under detection limit
455.086	C16 H23 O13 S	16	23	0	13	1	455.086	NA	NA	NA	NA	44587112	0	0	0	0	NA mean under detection limit
455.086	C16 H23 O13 S	16	23	0	13	1	NA	455.086	NA	NA	NA	0	15267360	0	0	0	NA mean under detection limit
455.086	C16 H23 O13 S	16	23	0	13	1	NA	NA	NA	455.086	NA	0	0	0	2314101	0	NA mean under detection limit
455.12	C20 H23 O12	20	23	0	12	0	455.119	NA	NA	NA	NA	4337774	0	0	0	0	NA mean under detection limit
455.12	C20 H23 O12	20	23	0	12	0	NA	455.119	NA	NA	NA	0	3220008	0	0	0	NA mean under detection limit
455.156	C21 H27 O11	21	27	0	11	0	NA	NA	455.156	NA	NA	0	0	5281626	0	0	NA mean under detection limit
455.156	C21 H27 O11	21	27	0	11	0	455.156	NA	NA	NA	NA	4780151	0	0	0	0	NA mean under detection limit
455.156	C21 H27 O11	21	27	0	11	0	NA	455.156	NA	NA	NA	0	11093553	0	0	0	NA mean under detection limit
457.099	C19 H21 O13	19	21	0	13	0	NA	NA	457.099	NA	NA	0	0	3480893	0	0	NA mean under detection limit
457.099	C19 H21 O13	19	21	0	13	0	457.099	NA	NA	NA	NA	3066419	0	0	0	0	NA mean under detection limit
457.099	C19 H21 O13	19	21	0	13	0	NA	457.099	NA	NA	NA	0	3485716	0	0	0	NA mean under detection limit
457.135	C20 H25 O12	20	25	0	12	0	NA	NA	457.135	NA	NA	0	0	5310790	0	0	NA mean under detection limit
457.135	C20 H25 O12	20	25	0	12	0	457.135	NA	NA	NA	NA	5685820	0	0	0	0	NA mean under detection limit
457.135	C20 H25 O12	20	25	0	12	0	NA	457.135	NA	NA	NA	0	7176222	0	0	0	NA mean under detection limit
457.172	C21 H29 O11	21	29	0	11	0	NA	457.172	NA	NA	NA	0	3440679	0	0	0	NA mean under detection limit
459.078	C18 H19 O14	18	19	0	14	0	NA	NA	459.078	NA	NA	0	0	8512300	0	0	NA mean under detection limit
459.078	C18 H19 O14	18	19	0	14	0	459.078	NA	NA	NA	NA	10605559	0	0	0	0	NA mean under detection limit
459.078	C18 H19 O14	18	19	0	14	0	NA	459.078	NA	NA	NA	0	10680841	0	0	0	NA mean under detection limit
459.078	C18 H19 O14	18	19	0	14	0	NA	NA	NA	459.078	NA	0	0	0	2611840	0	NA mean under detection limit
459.114	C19 H23 O13	19	23	0	13	0	NA	NA	459.114	NA	NA	0	0	5081909	0	0	NA mean under detection limit
459.114	C19 H23 O13	19	23	0	13	0	459.114	NA	NA	NA	NA	4928511	0	0	0	0	NA mean under detection limit
459.114	C19 H23 O13	19	23	0	13	0	NA	459.114	NA	NA	NA	0	6617618	0	0	0	NA mean under detection limit
459.151	C20 H27 O12	20	27	0	12	0	NA	NA	459.151	NA	NA	0	0	14967614	0	0	NA mean under detection limit
459.151	C20 H27 O12	20	27	0	12	0	459.151	NA	NA	NA	NA	7508999	0	0	0	0	NA mean under detection limit
459.151	C20 H27 O12	20	27	0	12	0	NA	459.151	NA	NA	NA	0	26040860	0	0	0	NA mean under detection limit
461.057	C17 H17 O15	17	17	0	15	0	NA	NA	NA	461.057	NA	0	0	0	2234376	0	NA mean under detection limit
461.057	C17 H17 O15	17	17	0	15	0	461.057	NA	NA	NA	NA	2737593	0	0	0	0	NA mean under detection limit
461.094	C18 H21 O14	18	21	0	14	0	NA	NA	461.094	NA	NA	0	0	15848742	0	0	NA mean under detection limit
461.094	C18 H21 O14	18	21	0	14	0	461.094	NA	NA	NA	NA	24509890	0	0	0	0	NA mean under detection limit
461.094	C18 H21 O14	18	21	0	14	0	NA	461.094	NA	NA	NA	0	18131982	0	0	0	NA mean under detection limit
461.094	C18 H21 O14	18	21	0	14	0	NA	NA	NA	461.094	NA	0	0	0	5806095	0	NA mean under detection limit
461.13	C19 H25 O13	19	25	0	13	0	NA	NA	461.13	NA	NA	0	0	6939952	0	0	NA mean under detection limit
461.13	C19 H25 O13	19	25	0	13	0	461.13	NA	NA	NA	NA	8281546	0	0	0	0	NA mean under detection limit
461.13	C19 H25 O13	19	25	0	13	0	NA	461.13	NA	NA	NA	0	7646233	0	0	0	NA mean under detection limit
461.166	C20 H29 O12	20	29	0	12	0	NA	NA	461.166	NA	NA	0	0	10024249	0	0	NA mean under detection limit
461.166	C20 H29 O12	20	29	0	12	0	NA	461.166	NA	NA	NA	0	16657442	0	0	0	NA mean under detection limit
463.073	C17 H19 O15	17	19	0	15	0	NA	NA	NA	463.073	NA	0	0	0	8038811	0	NA mean under detection limit
463.073	C17 H19 O15	17	19	0	15	0	463.073	NA	NA	NA	NA	10424194	0	0	0	0	NA mean under detection limit
463.109	C18 H23 O14	18	23	0	14	0	NA	NA	463.109	NA	NA	0	0	8273698	0	0	NA mean under detection limit
463.109	C18 H23 O14	18	23	0	14	0	463.109	NA	NA	NA	NA	15441802	0	0	0	0	NA mean under detection limit
463.109	C18 H23 O14	18	23	0	14	0	NA	463.109	NA	NA	NA	0	13086238	0	0	0	NA mean under detection limit
463.109	C18 H23 O14	18	23	0	14	0	NA	NA	NA	463.109	NA	0	0	0	3747235	0	NA mean under detection limit
463.122	C26 H23 O6 S	26	23	0	6	1	463.122	NA	NA	NA	NA	3185549	0	0	0	0	NA mean under detection limit
463.146	C19 H27 O13	19	27	0	13	0	NA	NA	463.146	NA	NA	0	0	2737452	0	0	NA mean under detection limit
463.146	C19 H27 O13	19	27	0	13	0	463.146	NA	NA	NA	NA	4721555	0	0	0	0	NA mean under detection limit
463.146	C19 H27 O13	19	27	0	13	0	NA	463.146	NA	NA	NA	0	2539560	0	0	0	NA mean under detection limit
463.161	C23 H27 O10	23	27	0	10	0	463.161	NA	NA	NA	NA	2557846	0	0	0	0	NA mean under detection limit
464.16	C19 H30 N O10 S	19	30	1	10	1	NA	464.16	NA	NA	NA	0	2174260	0	0	0	NA mean under detection limit
465.174	C27 H29 O5 S	27	29	0	5	1	NA	NA	NA	NA	465.174	0	0	0	0	54253868	NA mean under detection limit
465.174	C27 H29 O5 S	27	29	0	5	1	NA	NA	NA	NA	465.174	0	0	0	0	3889501	NA mean under detection limit
465.174	C27 H29 O5 S	27	29	0	5	1	NA	NA	NA	NA	465.174	0	0	0	0	13815874	NA mean under detection limit
466.102	C17 H24 N O12 S	17	24	1	12	1	466.102	NA	NA	NA	NA	2731055	0	0	0	0	NA mean under detection limit
466.139	C18 H28 N O11 S	18	28	1	11	1	NA	NA	466.139	NA	NA	0	0	3477025	0	0	NA mean under detection limit
466.139	C18 H28 N O11 S	18	28	1	11	1	466.139	NA	NA	NA	NA	2900023	0	0	0	0	NA mean under detection limit
466.139	C18 H28 N O11 S	18	28	1	11	1	NA	466.139	NA	NA	NA	0	4414790	0	0	0	NA mean under detection limit
467.086	C17 H23 O13 S	17	23	0	13	1	NA	NA	467.086	NA	NA	0	0	3531538	0	0	NA mean under detection limit
467.086	C17 H23 O13 S	17	23	0	13	1	NA	467.086	NA	NA	NA	0	6269510	0	0	0	NA mean under detection limit
467.12	C21 H23 O12	21	23	0	12	0	467.12	NA	NA	NA	NA	3297044	0	0	0	0	NA mean under detection limit
467.12	C21 H23 O12	21	23	0	12	0	NA	467.119	NA	NA	NA	0	3320398	0	0	0	NA mean under detection limit
467.156	C22 H27 O11	22	27	0	11	0	NA	NA	467.156	NA	NA	0	0	2294564	0	0	NA mean under detection limit
467.156	C22 H27 O11	22	27	0	11	0	467.156	NA	NA	NA	NA	2522397	0	0	0	0	NA mean under detection limit
467.156	C22 H27 O11	22	27	0	11	0	NA	467.156	NA	NA	NA	0	4597336	0	0	0	NA mean under detection limit
468.118	C17 H26 N O12 S	17	26	1	12	1	468.118	NA	NA	NA	NA	3362806	0	0	0	0	NA mean under detection limit
468.155	C18 H30 N O11 S	18	30	1	11	1	NA	468.154	NA	NA	NA	0	2858856	0	0	0	NA mean under detection limit
469.102	C17 H25 O13 S	17	25	0	13	1	NA	NA	469.102	NA	NA	0	0	13851923	0	0	NA mean under detection limit
469.102	C17 H25 O13 S	17	25	0	13	1	NA	469.102	NA	NA	NA	0	28542058	0	0	0	NA mean under detection limit
469.135	C21 H25 O12	21	25	0	12	0	469.135	NA	NA	NA	NA	2619611	0	0	0	0	NA mean under detection limit
469.135	C21 H25 O12	21	25	0	12	0	NA	469.135	NA	NA	NA	0	2762868	0	0	0	NA mean under detection limit
469.172	C22 H29 O11	22	29	0	11	0	NA	NA	469.172	NA	NA	0	0	3175717	0	0	NA mean under detection limit
469.172	C22 H29 O11	22	29	0	11	0	469.172	NA	NA	NA	NA	3712228	0	0	0	0	NA mean under detection limit
469.172	C22 H29 O11	22	29	0	11	0	NA	469.171	NA	NA	NA	0	5629054	0	0	0	NA mean under detection limit
469.172	C22 H29 O11	22	29	0	11	0	NA	NA	NA	469.172	NA	0	0	0	2431608	0	NA mean under detection limit
469.284	C22 H45 O8 S	22	45	0	8	1	NA	469.284	NA	NA	NA	0	2191517	0	0	0	NA mean under detection limit
471.078	C19 H19 O14	19	19	0	14	0	471.078	NA	NA	NA	NA	4231826	0	0	0	0	NA mean under detection limit
471.114	C20 H23 O13	20	23	0	13	0	NA	NA	471.115	NA	NA	0	0	2325269	0	0	NA mean under detection limit
471.114	C20 H23 O13	20	23	0	13	0	471.114	NA	NA	NA	NA	3360410	0	0	0	0	NA mean under detection limit
471.114	C20 H23 O13	20	23	0	13	0	NA	471.114	NA	NA	NA	0	3771030	0	0	0	NA mean under detection limit
471.151	C21 H27 O12	21	27	0	12	0	NA	NA	471.151	NA	NA	0	0	3634974	0	0	NA mean under detection limit
471.151	C21 H27 O12	21	27	0	12	0	471.151	NA	NA	NA	NA	3690146	0	0	0	0	NA mean under detection limit
471.151	C21 H27 O12	21	27	0	12	0	NA	471.151	NA	NA	NA	0	6717088	0	0	0	NA mean under detection limit
473.094	C19 H21 O14	19	21	0	14	0	NA	NA	473.094	NA	NA	0	0	5476624	0	0	NA mean under detection limit
473.094	C19 H21 O14	19	21	0	14	0	473.094	NA	NA	NA	NA	7565402	0	0	0	0	NA mean under detection limit
473.094	C19 H21 O14	19	21	0	14	0	NA	473.094	NA	NA	NA	0	8097981	0	0	0	NA mean under detection limit
473.13	C20 H25 O13	20	25	0	13	0	NA	NA	473.13	NA	NA	0	0	4204825	0	0	NA mean under detection limit
473.13	C20 H25 O13	20	25	0	13	0	473.13	NA	NA	NA	NA	7059554	0	0	0	0	NA mean under detection limit
473.13	C20 H25 O13	20	25	0	13	0	NA	473.13	NA	NA	NA	0	4904135	0	0	0	NA mean under detection limit
473.13	C20 H25 O13	20	25	0	13	0	NA	NA	NA	473.13	NA	0	0	0	4412849	0	NA mean under detection limit
473.166	C21 H29 O12	21	29	0	12	0	NA	NA	473.166	NA	NA	0	0	4507938	0	0	NA mean under detection limit
473.166	C21 H29 O12	21	29	0	12	0	473.166	NA	NA	NA	NA	2823274	0	0	0	0	NA mean under detection limit
473.166	C21 H29 O12	21	29	0	12	0	NA	473.166	NA	NA	NA	0	14444753	0	0	0	NA mean under detection limit
475.073	C18 H19 O15	18	19	0	15	0	NA	NA	475.073	NA	NA	0	0	2141452	0	0	NA mean under detection limit
475.073	C18 H19 O15	18	19	0	15	0	475.073	NA	NA	NA	NA	3118617	0	0	0	0	NA mean under detection limit
475.109	C19 H23 O14	19	23	0	14	0	NA	NA	475.109	NA	NA	0	0	13304597	0	0	NA mean under detection limit
475.109	C19 H23 O14	19	23	0	14	0	475.109	NA	NA	NA	NA	10107426	0	0	0	0	NA mean under detection limit
475.109	C19 H23 O14	19	23	0	14	0	NA	475.109	NA	NA	NA	0	13159155	0	0	0	NA mean under detection limit
475.109	C19 H23 O14	19	23	0	14	0	NA	NA	NA	475.109	NA	0	0	0	2197330	0	NA mean under detection limit
475.146	C20 H27 O13	20	27	0	13	0	NA	NA	475.146	NA	NA	0	0	4935455	0	0	NA mean under detection limit
475.146	C20 H27 O13	20	27	0	13	0	475.146	NA	NA	NA	NA	3434026	0	0	0	0	NA mean under detection limit
475.146	C20 H27 O13	20	27	0	13	0	NA	475.146	NA	NA	NA	0	5516029	0	0	0	NA mean under detection limit
475.182	C21 H31 O12	21	31	0	12	0	NA	475.182	NA	NA	NA	0	2472711	0	0	0	NA mean under detection limit
477.089	C18 H21 O15	18	21	0	15	0	NA	NA	477.089	NA	NA	0	0	3971347	0	0	NA mean under detection limit
477.089	C18 H21 O15	18	21	0	15	0	477.089	NA	NA	NA	NA	9317347	0	0	0	0	NA mean under detection limit
477.089	C18 H21 O15	18	21	0	15	0	NA	477.089	NA	NA	NA	0	3302691	0	0	0	NA mean under detection limit
477.089	C18 H21 O15	18	21	0	15	0	NA	NA	NA	477.089	NA	0	0	0	3169527	0	NA mean under detection limit
477.125	C19 H25 O14	19	25	0	14	0	NA	NA	477.125	NA	NA	0	0	8922396	0	0	NA mean under detection limit
477.125	C19 H25 O14	19	25	0	14	0	477.125	NA	NA	NA	NA	6417387	0	0	0	0	NA mean under detection limit
477.125	C19 H25 O14	19	25	0	14	0	NA	477.125	NA	NA	NA	0	9174317	0	0	0	NA mean under detection limit
477.161	C20 H29 O13	20	29	0	13	0	NA	NA	477.161	NA	NA	0	0	4058406	0	0	NA mean under detection limit
477.161	C20 H29 O13	20	29	0	13	0	NA	477.161	NA	NA	NA	0	3921207	0	0	0	NA mean under detection limit
479.068	C17 H19 O16	17	19	0	16	0	NA	NA	NA	479.068	NA	0	0	0	3031710	0	NA mean under detection limit
479.12	C22 H23 O12	22	23	0	12	0	479.119	NA	NA	NA	NA	2170801	0	0	0	0	NA mean under detection limit
479.19	C28 H31 O5 S	28	31	0	5	1	NA	NA	479.19	NA	NA	0	0	2835249	0	0	NA mean under detection limit
480.118	C18 H26 N O12 S	18	26	1	12	1	480.118	NA	NA	NA	NA	2561686	0	0	0	0	NA mean under detection limit
480.118	C18 H26 N O12 S	18	26	1	12	1	NA	480.118	NA	NA	NA	0	2686082	0	0	0	NA mean under detection limit
480.155	C19 H30 N O11 S	19	30	1	11	1	NA	NA	480.155	NA	NA	0	0	3139627	0	0	NA mean under detection limit
480.155	C19 H30 N O11 S	19	30	1	11	1	NA	480.155	NA	NA	NA	0	4009101	0	0	0	NA mean under detection limit
481.102	C18 H25 O13 S	18	25	0	13	1	481.102	NA	NA	NA	NA	2210679	0	0	0	0	NA mean under detection limit
481.102	C18 H25 O13 S	18	25	0	13	1	NA	481.102	NA	NA	NA	0	4414876	0	0	0	NA mean under detection limit
481.135	C22 H25 O12	22	25	0	12	0	481.135	NA	NA	NA	NA	2429311	0	0	0	0	NA mean under detection limit
481.135	C22 H25 O12	22	25	0	12	0	NA	481.135	NA	NA	NA	0	2601382	0	0	0	NA mean under detection limit
481.172	C23 H29 O11	23	29	0	11	0	NA	NA	481.172	NA	NA	0	0	2697522	0	0	NA mean under detection limit
481.172	C23 H29 O11	23	29	0	11	0	481.172	NA	NA	NA	NA	2896775	0	0	0	0	NA mean under detection limit
481.172	C23 H29 O11	23	29	0	11	0	NA	481.172	NA	NA	NA	0	3335600	0	0	0	NA mean under detection limit
482.134	C18 H28 N O12 S	18	28	1	12	1	482.134	NA	NA	NA	NA	4783204	0	0	0	0	NA mean under detection limit
482.134	C18 H28 N O12 S	18	28	1	12	1	NA	482.134	NA	NA	NA	0	4144837	0	0	0	NA mean under detection limit
482.134	C18 H28 N O12 S	18	28	1	12	1	NA	NA	NA	482.134	NA	0	0	0	3255604	0	NA mean under detection limit
483.081	C17 H23 O14 S	17	23	0	14	1	483.081	NA	NA	NA	NA	3942718	0	0	0	0	NA mean under detection limit
483.114	C21 H23 O13	21	23	0	13	0	483.114	NA	NA	NA	NA	2581318	0	0	0	0	NA mean under detection limit
483.114	C21 H23 O13	21	23	0	13	0	NA	483.114	NA	NA	NA	0	3106782	0	0	0	NA mean under detection limit
483.118	C18 H27 O13 S	18	27	0	13	1	NA	NA	483.118	NA	NA	0	0	3471147	0	0	NA mean under detection limit
483.118	C18 H27 O13 S	18	27	0	13	1	NA	483.118	NA	NA	NA	0	18682848	0	0	0	NA mean under detection limit
483.151	C22 H27 O12	22	27	0	12	0	NA	NA	483.151	NA	NA	0	0	2400051	0	0	NA mean under detection limit
483.151	C22 H27 O12	22	27	0	12	0	483.151	NA	NA	NA	NA	3025230	0	0	0	0	NA mean under detection limit
483.151	C22 H27 O12	22	27	0	12	0	NA	483.151	NA	NA	NA	0	3664873	0	0	0	NA mean under detection limit
483.187	C23 H31 O11	23	31	0	11	0	NA	483.187	NA	NA	NA	0	2947059	0	0	0	NA mean under detection limit
485.094	C20 H21 O14	20	21	0	14	0	NA	NA	485.094	NA	NA	0	0	2377004	0	0	NA mean under detection limit
485.094	C20 H21 O14	20	21	0	14	0	485.094	NA	NA	NA	NA	2566927	0	0	0	0	NA mean under detection limit
485.094	C20 H21 O14	20	21	0	14	0	NA	485.094	NA	NA	NA	0	3486233	0	0	0	NA mean under detection limit
485.13	C21 H25 O13	21	25	0	13	0	NA	NA	485.13	NA	NA	0	0	4601142	0	0	NA mean under detection limit
485.13	C21 H25 O13	21	25	0	13	0	485.13	NA	NA	NA	NA	15938328	0	0	0	0	NA mean under detection limit
485.13	C21 H25 O13	21	25	0	13	0	NA	485.13	NA	NA	NA	0	5629475	0	0	0	NA mean under detection limit
485.13	C21 H25 O13	21	25	0	13	0	NA	NA	NA	485.13	NA	0	0	0	7922624	0	NA mean under detection limit
485.166	C22 H29 O12	22	29	0	12	0	NA	NA	485.166	NA	NA	0	0	2716991	0	0	NA mean under detection limit
485.166	C22 H29 O12	22	29	0	12	0	NA	485.166	NA	NA	NA	0	5801518	0	0	0	NA mean under detection limit
485.279	C22 H45 O9 S	22	45	0	9	1	NA	NA	NA	NA	485.279	0	0	0	0	5684572	NA mean under detection limit
485.279	C22 H45 O9 S	22	45	0	9	1	NA	NA	NA	NA	485.279	0	0	0	0	4273978	NA mean under detection limit
485.279	C22 H45 O9 S	22	45	0	9	1	NA	NA	NA	NA	485.279	0	0	0	0	7370318	NA mean under detection limit
487.073	C19 H19 O15	19	19	0	15	0	487.073	NA	NA	NA	NA	4116700	0	0	0	0	NA mean under detection limit
487.109	C20 H23 O14	20	23	0	14	0	NA	NA	487.109	NA	NA	0	0	5760825	0	0	NA mean under detection limit
487.109	C20 H23 O14	20	23	0	14	0	487.109	NA	NA	NA	NA	7707877	0	0	0	0	NA mean under detection limit
487.109	C20 H23 O14	20	23	0	14	0	NA	487.109	NA	NA	NA	0	7299167	0	0	0	NA mean under detection limit
487.146	C21 H27 O13	21	27	0	13	0	NA	NA	487.146	NA	NA	0	0	4861762	0	0	NA mean under detection limit
487.146	C21 H27 O13	21	27	0	13	0	487.146	NA	NA	NA	NA	5432557	0	0	0	0	NA mean under detection limit
487.146	C21 H27 O13	21	27	0	13	0	NA	487.146	NA	NA	NA	0	6557801	0	0	0	NA mean under detection limit
487.182	C22 H31 O12	22	31	0	12	0	NA	NA	487.182	NA	NA	0	0	2851660	0	0	NA mean under detection limit
487.182	C22 H31 O12	22	31	0	12	0	487.182	NA	NA	NA	NA	2198774	0	0	0	0	NA mean under detection limit
487.182	C22 H31 O12	22	31	0	12	0	NA	487.182	NA	NA	NA	0	10139764	0	0	0	NA mean under detection limit
489.052	C18 H17 O16	18	17	0	16	0	NA	NA	NA	489.052	NA	0	0	0	9189150	0	NA mean under detection limit
489.052	C18 H17 O16	18	17	0	16	0	NA	NA	489.052	NA	NA	0	0	6861108	0	0	NA mean under detection limit
489.052	C18 H17 O16	18	17	0	16	0	489.052	NA	NA	NA	NA	22632108	0	0	0	0	NA mean under detection limit
489.052	C18 H17 O16	18	17	0	16	0	NA	489.052	NA	NA	NA	0	4094608	0	0	0	NA mean under detection limit
489.089	C19 H21 O15	19	21	0	15	0	NA	NA	489.089	NA	NA	0	0	6404413	0	0	NA mean under detection limit
489.089	C19 H21 O15	19	21	0	15	0	489.089	NA	NA	NA	NA	11982517	0	0	0	0	NA mean under detection limit
489.089	C19 H21 O15	19	21	0	15	0	NA	489.089	NA	NA	NA	0	4073114	0	0	0	NA mean under detection limit
489.089	C19 H21 O15	19	21	0	15	0	NA	NA	NA	489.089	NA	0	0	0	4066086	0	NA mean under detection limit
489.125	C20 H25 O14	20	25	0	14	0	NA	NA	489.125	NA	NA	0	0	11874630	0	0	NA mean under detection limit
489.125	C20 H25 O14	20	25	0	14	0	489.125	NA	NA	NA	NA	13932221	0	0	0	0	NA mean under detection limit
489.125	C20 H25 O14	20	25	0	14	0	NA	489.125	NA	NA	NA	0	16169637	0	0	0	NA mean under detection limit
489.125	C20 H25 O14	20	25	0	14	0	NA	NA	NA	489.125	NA	0	0	0	2975534	0	NA mean under detection limit
489.161	C21 H29 O13	21	29	0	13	0	NA	NA	489.161	NA	NA	0	0	5155152	0	0	NA mean under detection limit
489.161	C21 H29 O13	21	29	0	13	0	489.161	NA	NA	NA	NA	3316422	0	0	0	0	NA mean under detection limit
489.161	C21 H29 O13	21	29	0	13	0	NA	489.161	NA	NA	NA	0	7275184	0	0	0	NA mean under detection limit
490.139	C20 H28 N O11 S	20	28	1	11	1	NA	NA	490.139	NA	NA	0	0	2185807	0	0	NA mean under detection limit
490.139	C20 H28 N O11 S	20	28	1	11	1	NA	490.139	NA	NA	NA	0	3188682	0	0	0	NA mean under detection limit
491.068	C18 H19 O16	18	19	0	16	0	NA	NA	NA	491.068	NA	0	0	0	6922460	0	NA mean under detection limit
491.068	C18 H19 O16	18	19	0	16	0	NA	NA	491.068	NA	NA	0	0	2221378	0	0	NA mean under detection limit
491.068	C18 H19 O16	18	19	0	16	0	491.068	NA	NA	NA	NA	8022153	0	0	0	0	NA mean under detection limit
491.104	C19 H23 O15	19	23	0	15	0	NA	NA	491.104	NA	NA	0	0	7488332	0	0	NA mean under detection limit
491.104	C19 H23 O15	19	23	0	15	0	491.104	NA	NA	NA	NA	11491473	0	0	0	0	NA mean under detection limit
491.104	C19 H23 O15	19	23	0	15	0	NA	491.104	NA	NA	NA	0	8680672	0	0	0	NA mean under detection limit
491.104	C19 H23 O15	19	23	0	15	0	NA	NA	NA	491.104	NA	0	0	0	3448036	0	NA mean under detection limit
491.141	C20 H27 O14	20	27	0	14	0	NA	NA	491.141	NA	NA	0	0	8715093	0	0	NA mean under detection limit
491.141	C20 H27 O14	20	27	0	14	0	491.141	NA	NA	NA	NA	25884826	0	0	0	0	NA mean under detection limit
491.141	C20 H27 O14	20	27	0	14	0	NA	491.141	NA	NA	NA	0	12356843	0	0	0	NA mean under detection limit
491.141	C20 H27 O14	20	27	0	14	0	NA	NA	NA	491.141	NA	0	0	0	7481581	0	NA mean under detection limit
491.177	C21 H31 O13	21	31	0	13	0	NA	NA	491.177	NA	NA	0	0	2367326	0	0	NA mean under detection limit
491.177	C21 H31 O13	21	31	0	13	0	NA	491.177	NA	NA	NA	0	3475701	0	0	0	NA mean under detection limit
491.192	C25 H31 O10	25	31	0	10	0	491.192	NA	NA	NA	NA	2800806	0	0	0	0	NA mean under detection limit
492.155	C20 H30 N O11 S	20	30	1	11	1	NA	NA	492.155	NA	NA	0	0	2468446	0	0	NA mean under detection limit
492.155	C20 H30 N O11 S	20	30	1	11	1	NA	492.155	NA	NA	NA	0	3115535	0	0	0	NA mean under detection limit
493.135	C23 H25 O12	23	25	0	12	0	NA	493.135	NA	NA	NA	0	2520874	0	0	0	NA mean under detection limit
494.134	C19 H28 N O12 S	19	28	1	12	1	NA	NA	494.134	NA	NA	0	0	2294372	0	0	NA mean under detection limit
494.134	C19 H28 N O12 S	19	28	1	12	1	494.134	NA	NA	NA	NA	4740966	0	0	0	0	NA mean under detection limit
494.134	C19 H28 N O12 S	19	28	1	12	1	NA	494.134	NA	NA	NA	0	3126345	0	0	0	NA mean under detection limit
494.17	C20 H32 N O11 S	20	32	1	11	1	NA	494.17	NA	NA	NA	0	4773972	0	0	0	NA mean under detection limit
495.081	C18 H23 O14 S	18	23	0	14	1	495.081	NA	NA	NA	NA	2554954	0	0	0	0	NA mean under detection limit
495.118	C19 H27 O13 S	19	27	0	13	1	NA	495.118	NA	NA	NA	0	4242788	0	0	0	NA mean under detection limit
495.151	C23 H27 O12	23	27	0	12	0	NA	NA	495.151	NA	NA	0	0	2340719	0	0	NA mean under detection limit
495.151	C23 H27 O12	23	27	0	12	0	495.151	NA	NA	NA	NA	6175835	0	0	0	0	NA mean under detection limit
495.151	C23 H27 O12	23	27	0	12	0	NA	495.151	NA	NA	NA	0	3980653	0	0	0	NA mean under detection limit
495.151	C23 H27 O12	23	27	0	12	0	NA	NA	NA	495.151	NA	0	0	0	3814506	0	NA mean under detection limit
495.187	C24 H31 O11	24	31	0	11	0	NA	495.187	NA	NA	NA	0	3460472	0	0	0	NA mean under detection limit
496.113	C18 H26 N O13 S	18	26	1	13	1	496.113	NA	NA	NA	NA	3079493	0	0	0	0	NA mean under detection limit
496.149	C19 H30 N O12 S	19	30	1	12	1	NA	NA	496.149	NA	NA	0	0	5134453	0	0	NA mean under detection limit
496.149	C19 H30 N O12 S	19	30	1	12	1	496.149	NA	NA	NA	NA	9325901	0	0	0	0	NA mean under detection limit
496.149	C19 H30 N O12 S	19	30	1	12	1	NA	496.149	NA	NA	NA	0	4942476	0	0	0	NA mean under detection limit
497.097	C18 H25 O14 S	18	25	0	14	1	NA	NA	497.097	NA	NA	0	0	2905453	0	0	NA mean under detection limit
497.097	C18 H25 O14 S	18	25	0	14	1	497.097	NA	NA	NA	NA	2442293	0	0	0	0	NA mean under detection limit
497.097	C18 H25 O14 S	18	25	0	14	1	NA	497.097	NA	NA	NA	0	3383195	0	0	0	NA mean under detection limit
497.13	C22 H25 O13	22	25	0	13	0	NA	NA	497.13	NA	NA	0	0	3819894	0	0	NA mean under detection limit
497.13	C22 H25 O13	22	25	0	13	0	497.13	NA	NA	NA	NA	7812669	0	0	0	0	NA mean under detection limit
497.13	C22 H25 O13	22	25	0	13	0	NA	497.13	NA	NA	NA	0	5381028	0	0	0	NA mean under detection limit
497.13	C22 H25 O13	22	25	0	13	0	NA	NA	NA	497.13	NA	0	0	0	2673190	0	NA mean under detection limit
497.133	C19 H29 O13 S	19	29	0	13	1	NA	497.133	NA	NA	NA	0	5276581	0	0	0	NA mean under detection limit
497.166	C23 H29 O12	23	29	0	12	0	497.166	NA	NA	NA	NA	2661958	0	0	0	0	NA mean under detection limit
497.166	C23 H29 O12	23	29	0	12	0	NA	497.166	NA	NA	NA	0	3943343	0	0	0	NA mean under detection limit
497.203	C24 H33 O11	24	33	0	11	0	NA	497.203	NA	NA	NA	0	2410937	0	0	0	NA mean under detection limit
499.073	C20 H19 O15	20	19	0	15	0	499.073	NA	NA	NA	NA	3015707	0	0	0	0	NA mean under detection limit
499.076	C17 H23 O15 S	17	23	0	15	1	499.076	NA	NA	NA	NA	2480156	0	0	0	0	NA mean under detection limit
499.109	C21 H23 O14	21	23	0	14	0	NA	NA	499.109	NA	NA	0	0	2978686	0	0	NA mean under detection limit
499.109	C21 H23 O14	21	23	0	14	0	499.109	NA	NA	NA	NA	5046308	0	0	0	0	NA mean under detection limit
499.109	C21 H23 O14	21	23	0	14	0	NA	499.109	NA	NA	NA	0	3536344	0	0	0	NA mean under detection limit
499.146	C22 H27 O13	22	27	0	13	0	NA	NA	499.146	NA	NA	0	0	9741191	0	0	NA mean under detection limit
499.146	C22 H27 O13	22	27	0	13	0	499.146	NA	NA	NA	NA	9338925	0	0	0	0	NA mean under detection limit
499.146	C22 H27 O13	22	27	0	13	0	NA	499.146	NA	NA	NA	0	12346850	0	0	0	NA mean under detection limit
499.146	C22 H27 O13	22	27	0	13	0	NA	NA	NA	499.146	NA	0	0	0	2756076	0	NA mean under detection limit
499.182	C23 H31 O12	23	31	0	12	0	NA	499.182	NA	NA	NA	0	4590061	0	0	0	NA mean under detection limit
501.089	C20 H21 O15	20	21	0	15	0	NA	NA	501.089	NA	NA	0	0	3323270	0	0	NA mean under detection limit
501.089	C20 H21 O15	20	21	0	15	0	501.089	NA	NA	NA	NA	4933136	0	0	0	0	NA mean under detection limit
501.089	C20 H21 O15	20	21	0	15	0	NA	501.089	NA	NA	NA	0	3075081	0	0	0	NA mean under detection limit
501.125	C21 H25 O14	21	25	0	14	0	NA	NA	501.125	NA	NA	0	0	4599184	0	0	NA mean under detection limit
501.125	C21 H25 O14	21	25	0	14	0	501.125	NA	NA	NA	NA	6332953	0	0	0	0	NA mean under detection limit
501.125	C21 H25 O14	21	25	0	14	0	NA	501.125	NA	NA	NA	0	7839763	0	0	0	NA mean under detection limit
501.161	C22 H29 O13	22	29	0	13	0	NA	NA	501.161	NA	NA	0	0	5485977	0	0	NA mean under detection limit
501.161	C22 H29 O13	22	29	0	13	0	501.161	NA	NA	NA	NA	4209186	0	0	0	0	NA mean under detection limit
501.161	C22 H29 O13	22	29	0	13	0	NA	501.161	NA	NA	NA	0	8015902	0	0	0	NA mean under detection limit
501.198	C23 H33 O12	23	33	0	12	0	NA	501.198	NA	NA	NA	0	3288104	0	0	0	NA mean under detection limit
503.068	C19 H19 O16	19	19	0	16	0	NA	NA	503.068	NA	NA	0	0	8916879	0	0	NA mean under detection limit
503.068	C19 H19 O16	19	19	0	16	0	503.068	NA	NA	NA	NA	11826178	0	0	0	0	NA mean under detection limit
503.068	C19 H19 O16	19	19	0	16	0	NA	503.068	NA	NA	NA	0	10885686	0	0	0	NA mean under detection limit
503.068	C19 H19 O16	19	19	0	16	0	NA	NA	NA	503.068	NA	0	0	0	2156387	0	NA mean under detection limit
503.104	C20 H23 O15	20	23	0	15	0	NA	NA	503.104	NA	NA	0	0	8302488	0	0	NA mean under detection limit
503.104	C20 H23 O15	20	23	0	15	0	503.104	NA	NA	NA	NA	8854540	0	0	0	0	NA mean under detection limit
503.104	C20 H23 O15	20	23	0	15	0	NA	503.104	NA	NA	NA	0	6937152	0	0	0	NA mean under detection limit
503.141	C21 H27 O14	21	27	0	14	0	NA	NA	503.141	NA	NA	0	0	8429474	0	0	NA mean under detection limit
503.141	C21 H27 O14	21	27	0	14	0	503.141	NA	NA	NA	NA	22807572	0	0	0	0	NA mean under detection limit
503.141	C21 H27 O14	21	27	0	14	0	NA	503.141	NA	NA	NA	0	12405322	0	0	0	NA mean under detection limit
503.141	C21 H27 O14	21	27	0	14	0	NA	NA	NA	503.141	NA	0	0	0	8117108	0	NA mean under detection limit
503.177	C22 H31 O13	22	31	0	13	0	NA	NA	503.177	NA	NA	0	0	2605995	0	0	NA mean under detection limit
503.177	C22 H31 O13	22	31	0	13	0	NA	503.177	NA	NA	NA	0	4685397	0	0	0	NA mean under detection limit
504.155	C21 H30 N O11 S	21	30	1	11	1	NA	504.154	NA	NA	NA	0	2976614	0	0	0	NA mean under detection limit
505.084	C19 H21 O16	19	21	0	16	0	NA	NA	505.084	NA	NA	0	0	9892257	0	0	NA mean under detection limit
505.084	C19 H21 O16	19	21	0	16	0	505.084	NA	NA	NA	NA	37987844	0	0	0	0	NA mean under detection limit
505.084	C19 H21 O16	19	21	0	16	0	NA	505.083	NA	NA	NA	0	7650408	0	0	0	NA mean under detection limit
505.084	C19 H21 O16	19	21	0	16	0	NA	NA	NA	505.084	NA	0	0	0	11263276	0	NA mean under detection limit
505.12	C20 H25 O15	20	25	0	15	0	NA	NA	505.12	NA	NA	0	0	8153515	0	0	NA mean under detection limit
505.12	C20 H25 O15	20	25	0	15	0	505.12	NA	NA	NA	NA	13547022	0	0	0	0	NA mean under detection limit
505.12	C20 H25 O15	20	25	0	15	0	NA	505.12	NA	NA	NA	0	9354354	0	0	0	NA mean under detection limit
505.156	C21 H29 O14	21	29	0	14	0	NA	NA	505.156	NA	NA	0	0	8516020	0	0	NA mean under detection limit
505.156	C21 H29 O14	21	29	0	14	0	505.156	NA	NA	NA	NA	15398423	0	0	0	0	NA mean under detection limit
505.156	C21 H29 O14	21	29	0	14	0	NA	505.156	NA	NA	NA	0	8731772	0	0	0	NA mean under detection limit
507.063	C18 H19 O17	18	19	0	17	0	NA	NA	NA	507.063	NA	0	0	0	4445935	0	NA mean under detection limit
507.081	C19 H23 O14 S	19	23	0	14	1	507.081	NA	NA	NA	NA	3070985	0	0	0	0	NA mean under detection limit
507.099	C19 H23 O16	19	23	0	16	0	NA	NA	507.099	NA	NA	0	0	4916148	0	0	NA mean under detection limit
507.099	C19 H23 O16	19	23	0	16	0	507.099	NA	NA	NA	NA	19826702	0	0	0	0	NA mean under detection limit
507.099	C19 H23 O16	19	23	0	16	0	NA	507.099	NA	NA	NA	0	2256533	0	0	0	NA mean under detection limit
507.099	C19 H23 O16	19	23	0	16	0	NA	NA	NA	507.099	NA	0	0	0	7294711	0	NA mean under detection limit
507.112	C27 H23 O8 S	27	23	0	8	1	507.112	NA	NA	NA	NA	3325969	0	0	0	0	NA mean under detection limit
507.136	C20 H27 O15	20	27	0	15	0	507.136	NA	NA	NA	NA	2631703	0	0	0	0	NA mean under detection limit
507.151	C24 H27 O12	24	27	0	12	0	507.151	NA	NA	NA	NA	2948123	0	0	0	0	NA mean under detection limit
507.151	C24 H27 O12	24	27	0	12	0	NA	507.151	NA	NA	NA	0	2538659	0	0	0	NA mean under detection limit
508.077	C18 H22 N O14 S	18	22	1	14	1	508.077	NA	NA	NA	NA	2905357	0	0	0	0	NA mean under detection limit
508.149	C20 H30 N O12 S	20	30	1	12	1	NA	NA	508.149	NA	NA	0	0	4080841	0	0	NA mean under detection limit
508.149	C20 H30 N O12 S	20	30	1	12	1	508.149	NA	NA	NA	NA	3027744	0	0	0	0	NA mean under detection limit
508.149	C20 H30 N O12 S	20	30	1	12	1	NA	508.149	NA	NA	NA	0	5294005	0	0	0	NA mean under detection limit
509.166	C24 H29 O12	24	29	0	12	0	NA	NA	509.167	NA	NA	0	0	2459093	0	0	NA mean under detection limit
509.166	C24 H29 O12	24	29	0	12	0	509.166	NA	NA	NA	NA	2940459	0	0	0	0	NA mean under detection limit
509.166	C24 H29 O12	24	29	0	12	0	NA	509.167	NA	NA	NA	0	3253450	0	0	0	NA mean under detection limit
510.129	C19 H28 N O13 S	19	28	1	13	1	510.129	NA	NA	NA	NA	2447658	0	0	0	0	NA mean under detection limit
510.165	C20 H32 N O12 S	20	32	1	12	1	NA	NA	510.165	NA	NA	0	0	8584924	0	0	NA mean under detection limit
510.165	C20 H32 N O12 S	20	32	1	12	1	510.165	NA	NA	NA	NA	5151540	0	0	0	0	NA mean under detection limit
510.165	C20 H32 N O12 S	20	32	1	12	1	NA	510.165	NA	NA	NA	0	10678744	0	0	0	NA mean under detection limit
511.076	C18 H23 O15 S	18	23	0	15	1	511.076	NA	NA	NA	NA	14515239	0	0	0	0	NA mean under detection limit
511.076	C18 H23 O15 S	18	23	0	15	1	NA	NA	NA	511.076	NA	0	0	0	4377219	0	NA mean under detection limit
511.146	C23 H27 O13	23	27	0	13	0	NA	NA	511.146	NA	NA	0	0	2501599	0	0	NA mean under detection limit
511.146	C23 H27 O13	23	27	0	13	0	NA	511.146	NA	NA	NA	0	4618976	0	0	0	NA mean under detection limit
511.182	C24 H31 O12	24	31	0	12	0	NA	511.182	NA	NA	NA	0	2511593	0	0	0	NA mean under detection limit
513.092	C18 H25 O15 S	18	25	0	15	1	NA	NA	513.092	NA	NA	0	0	2515936	0	0	NA mean under detection limit
513.092	C18 H25 O15 S	18	25	0	15	1	513.092	NA	NA	NA	NA	92343880	0	0	0	0	NA mean under detection limit
513.092	C18 H25 O15 S	18	25	0	15	1	NA	513.092	NA	NA	NA	0	3223782	0	0	0	NA mean under detection limit
513.092	C18 H25 O15 S	18	25	0	15	1	NA	NA	NA	513.092	NA	0	0	0	41956432	0	NA mean under detection limit
513.125	C22 H25 O14	22	25	0	14	0	NA	513.125	NA	NA	NA	0	3636463	0	0	0	NA mean under detection limit
513.161	C23 H29 O13	23	29	0	13	0	NA	NA	513.161	NA	NA	0	0	5048818	0	0	NA mean under detection limit
513.161	C23 H29 O13	23	29	0	13	0	513.161	NA	NA	NA	NA	7358042	0	0	0	0	NA mean under detection limit
513.161	C23 H29 O13	23	29	0	13	0	NA	513.161	NA	NA	NA	0	9856248	0	0	0	NA mean under detection limit
515.068	C20 H19 O16	20	19	0	16	0	515.068	NA	NA	NA	NA	4126820	0	0	0	0	NA mean under detection limit
515.104	C21 H23 O15	21	23	0	15	0	NA	NA	515.104	NA	NA	0	0	3107827	0	0	NA mean under detection limit
515.104	C21 H23 O15	21	23	0	15	0	515.104	NA	NA	NA	NA	4480110	0	0	0	0	NA mean under detection limit
515.104	C21 H23 O15	21	23	0	15	0	NA	515.104	NA	NA	NA	0	3252982	0	0	0	NA mean under detection limit
515.141	C22 H27 O14	22	27	0	14	0	NA	NA	515.141	NA	NA	0	0	4063228	0	0	NA mean under detection limit
515.141	C22 H27 O14	22	27	0	14	0	515.141	NA	NA	NA	NA	7014520	0	0	0	0	NA mean under detection limit
515.141	C22 H27 O14	22	27	0	14	0	NA	515.141	NA	NA	NA	0	6309631	0	0	0	NA mean under detection limit
515.141	C22 H27 O14	22	27	0	14	0	NA	NA	NA	515.141	NA	0	0	0	3734053	0	NA mean under detection limit
515.177	C23 H31 O13	23	31	0	13	0	NA	NA	515.177	NA	NA	0	0	4000774	0	0	NA mean under detection limit
515.177	C23 H31 O13	23	31	0	13	0	NA	515.177	NA	NA	NA	0	6469385	0	0	0	NA mean under detection limit
517.084	C20 H21 O16	20	21	0	16	0	NA	NA	517.084	NA	NA	0	0	9088508	0	0	NA mean under detection limit
517.084	C20 H21 O16	20	21	0	16	0	517.083	NA	NA	NA	NA	14828181	0	0	0	0	NA mean under detection limit
517.084	C20 H21 O16	20	21	0	16	0	NA	517.084	NA	NA	NA	0	11041012	0	0	0	NA mean under detection limit
517.084	C20 H21 O16	20	21	0	16	0	NA	NA	NA	517.084	NA	0	0	0	6352867	0	NA mean under detection limit
517.12	C21 H25 O15	21	25	0	15	0	NA	NA	517.12	NA	NA	0	0	5336582	0	0	NA mean under detection limit
517.12	C21 H25 O15	21	25	0	15	0	517.12	NA	NA	NA	NA	6496927	0	0	0	0	NA mean under detection limit
517.12	C21 H25 O15	21	25	0	15	0	NA	517.12	NA	NA	NA	0	6689022	0	0	0	NA mean under detection limit
517.12	C21 H25 O15	21	25	0	15	0	NA	NA	NA	517.12	NA	0	0	0	2897899	0	NA mean under detection limit
517.156	C22 H29 O14	22	29	0	14	0	NA	NA	517.156	NA	NA	0	0	13094415	0	0	NA mean under detection limit
517.156	C22 H29 O14	22	29	0	14	0	517.156	NA	NA	NA	NA	12837545	0	0	0	0	NA mean under detection limit
517.156	C22 H29 O14	22	29	0	14	0	NA	517.156	NA	NA	NA	0	12925191	0	0	0	NA mean under detection limit
517.193	C23 H33 O13	23	33	0	13	0	NA	517.193	NA	NA	NA	0	2617104	0	0	0	NA mean under detection limit
519.099	C20 H23 O16	20	23	0	16	0	NA	NA	519.099	NA	NA	0	0	15904784	0	0	NA mean under detection limit
519.099	C20 H23 O16	20	23	0	16	0	519.099	NA	NA	NA	NA	16446671	0	0	0	0	NA mean under detection limit
519.099	C20 H23 O16	20	23	0	16	0	NA	519.099	NA	NA	NA	0	15874804	0	0	0	NA mean under detection limit
519.099	C20 H23 O16	20	23	0	16	0	NA	NA	NA	519.099	NA	0	0	0	4864433	0	NA mean under detection limit
519.136	C21 H27 O15	21	27	0	15	0	NA	NA	519.135	NA	NA	0	0	7147545	0	0	NA mean under detection limit
519.136	C21 H27 O15	21	27	0	15	0	519.136	NA	NA	NA	NA	6886617	0	0	0	0	NA mean under detection limit
519.136	C21 H27 O15	21	27	0	15	0	NA	519.136	NA	NA	NA	0	6595325	0	0	0	NA mean under detection limit
519.172	C22 H31 O14	22	31	0	14	0	NA	NA	519.172	NA	NA	0	0	13344803	0	0	NA mean under detection limit
519.172	C22 H31 O14	22	31	0	14	0	519.172	NA	NA	NA	NA	4664548	0	0	0	0	NA mean under detection limit
519.172	C22 H31 O14	22	31	0	14	0	NA	519.172	NA	NA	NA	0	8866566	0	0	0	NA mean under detection limit
520.149	C21 H30 N O12 S	21	30	1	12	1	NA	NA	520.149	NA	NA	0	0	2270501	0	0	NA mean under detection limit
521.115	C20 H25 O16	20	25	0	16	0	NA	NA	521.115	NA	NA	0	0	6464035	0	0	NA mean under detection limit
521.115	C20 H25 O16	20	25	0	16	0	521.115	NA	NA	NA	NA	7405330	0	0	0	0	NA mean under detection limit
521.115	C20 H25 O16	20	25	0	16	0	NA	521.115	NA	NA	NA	0	6917355	0	0	0	NA mean under detection limit
521.151	C21 H29 O15	21	29	0	15	0	521.151	NA	NA	NA	NA	2509596	0	0	0	0	NA mean under detection limit
522.129	C20 H28 N O13 S	20	28	1	13	1	522.129	NA	NA	NA	NA	3117112	0	0	0	0	NA mean under detection limit
522.165	C21 H32 N O12 S	21	32	1	12	1	NA	NA	522.165	NA	NA	0	0	2473784	0	0	NA mean under detection limit
522.165	C21 H32 N O12 S	21	32	1	12	1	NA	522.165	NA	NA	NA	0	4235758	0	0	0	NA mean under detection limit
523.182	C25 H31 O12	25	31	0	12	0	523.182	NA	NA	NA	NA	2568556	0	0	0	0	NA mean under detection limit
523.182	C25 H31 O12	25	31	0	12	0	NA	523.182	NA	NA	NA	0	2801895	0	0	0	NA mean under detection limit
524.108	C19 H26 N O14 S	19	26	1	14	1	524.108	NA	NA	NA	NA	2281085	0	0	0	0	NA mean under detection limit
524.144	C20 H30 N O13 S	20	30	1	13	1	NA	NA	524.144	NA	NA	0	0	2754881	0	0	NA mean under detection limit
524.144	C20 H30 N O13 S	20	30	1	13	1	524.144	NA	NA	NA	NA	3796615	0	0	0	0	NA mean under detection limit
524.144	C20 H30 N O13 S	20	30	1	13	1	NA	524.144	NA	NA	NA	0	2738129	0	0	0	NA mean under detection limit
524.181	C21 H34 N O12 S	21	34	1	12	1	NA	NA	524.181	NA	NA	0	0	3890506	0	0	NA mean under detection limit
524.181	C21 H34 N O12 S	21	34	1	12	1	524.181	NA	NA	NA	NA	2254482	0	0	0	0	NA mean under detection limit
524.181	C21 H34 N O12 S	21	34	1	12	1	NA	524.181	NA	NA	NA	0	11030489	0	0	0	NA mean under detection limit
525.092	C19 H25 O15 S	19	25	0	15	1	NA	NA	525.092	NA	NA	0	0	8724026	0	0	NA mean under detection limit
525.092	C19 H25 O15 S	19	25	0	15	1	525.092	NA	NA	NA	NA	16587680	0	0	0	0	NA mean under detection limit
525.092	C19 H25 O15 S	19	25	0	15	1	NA	525.092	NA	NA	NA	0	4092086	0	0	0	NA mean under detection limit
525.125	C23 H25 O14	23	25	0	14	0	525.125	NA	NA	NA	NA	2656170	0	0	0	0	NA mean under detection limit
525.125	C23 H25 O14	23	25	0	14	0	NA	525.125	NA	NA	NA	0	2609342	0	0	0	NA mean under detection limit
525.161	C24 H29 O13	24	29	0	13	0	NA	NA	525.161	NA	NA	0	0	2880076	0	0	NA mean under detection limit
525.161	C24 H29 O13	24	29	0	13	0	525.161	NA	NA	NA	NA	4524981	0	0	0	0	NA mean under detection limit
525.161	C24 H29 O13	24	29	0	13	0	NA	525.161	NA	NA	NA	0	4443334	0	0	0	NA mean under detection limit
525.161	C24 H29 O13	24	29	0	13	0	NA	NA	NA	525.161	NA	0	0	0	2285351	0	NA mean under detection limit
526.124	C19 H28 N O14 S	19	28	1	14	1	526.124	NA	NA	NA	NA	8377556	0	0	0	0	NA mean under detection limit
526.124	C19 H28 N O14 S	19	28	1	14	1	NA	NA	NA	526.124	NA	0	0	0	7122951	0	NA mean under detection limit
527.071	C18 H23 O16 S	18	23	0	16	1	527.071	NA	NA	NA	NA	3233264	0	0	0	0	NA mean under detection limit
527.108	C19 H27 O15 S	19	27	0	15	1	NA	NA	527.108	NA	NA	0	0	71112784	0	0	NA mean under detection limit
527.108	C19 H27 O15 S	19	27	0	15	1	527.108	NA	NA	NA	NA	75668984	0	0	0	0	NA mean under detection limit
527.108	C19 H27 O15 S	19	27	0	15	1	NA	527.108	NA	NA	NA	0	26632856	0	0	0	NA mean under detection limit
527.108	C19 H27 O15 S	19	27	0	15	1	NA	NA	NA	527.108	NA	0	0	0	3768556	0	NA mean under detection limit
527.141	C23 H27 O14	23	27	0	14	0	NA	527.141	NA	NA	NA	0	4218528	0	0	0	NA mean under detection limit
527.177	C24 H31 O13	24	31	0	13	0	527.177	NA	NA	NA	NA	3057168	0	0	0	0	NA mean under detection limit
527.177	C24 H31 O13	24	31	0	13	0	NA	527.177	NA	NA	NA	0	8565417	0	0	0	NA mean under detection limit
529.084	C21 H21 O16	21	21	0	16	0	529.083	NA	NA	NA	NA	2765906	0	0	0	0	NA mean under detection limit
529.12	C22 H25 O15	22	25	0	15	0	NA	NA	529.12	NA	NA	0	0	3331677	0	0	NA mean under detection limit
529.12	C22 H25 O15	22	25	0	15	0	529.12	NA	NA	NA	NA	4393053	0	0	0	0	NA mean under detection limit
529.12	C22 H25 O15	22	25	0	15	0	NA	529.12	NA	NA	NA	0	3861621	0	0	0	NA mean under detection limit
529.156	C23 H29 O14	23	29	0	14	0	NA	NA	529.156	NA	NA	0	0	4072039	0	0	NA mean under detection limit
529.156	C23 H29 O14	23	29	0	14	0	529.156	NA	NA	NA	NA	5644392	0	0	0	0	NA mean under detection limit
529.156	C23 H29 O14	23	29	0	14	0	NA	529.156	NA	NA	NA	0	7457918	0	0	0	NA mean under detection limit
529.193	C24 H33 O13	24	33	0	13	0	NA	NA	529.192	NA	NA	0	0	2229872	0	0	NA mean under detection limit
529.193	C24 H33 O13	24	33	0	13	0	NA	529.193	NA	NA	NA	0	3234950	0	0	0	NA mean under detection limit
529.305	C24 H49 O10 S	24	49	0	10	1	NA	NA	529.305	NA	NA	0	0	4046478	0	0	NA mean under detection limit
529.305	C24 H49 O10 S	24	49	0	10	1	529.305	NA	NA	NA	NA	2440854	0	0	0	0	NA mean under detection limit
529.305	C24 H49 O10 S	24	49	0	10	1	NA	529.305	NA	NA	NA	0	3996832	0	0	0	NA mean under detection limit
531.099	C21 H23 O16	21	23	0	16	0	NA	NA	531.099	NA	NA	0	0	10468453	0	0	NA mean under detection limit
531.099	C21 H23 O16	21	23	0	16	0	531.099	NA	NA	NA	NA	12149436	0	0	0	0	NA mean under detection limit
531.099	C21 H23 O16	21	23	0	16	0	NA	531.099	NA	NA	NA	0	13403717	0	0	0	NA mean under detection limit
531.099	C21 H23 O16	21	23	0	16	0	NA	NA	NA	531.099	NA	0	0	0	3511446	0	NA mean under detection limit
531.136	C22 H27 O15	22	27	0	15	0	NA	NA	531.136	NA	NA	0	0	6476911	0	0	NA mean under detection limit
531.136	C22 H27 O15	22	27	0	15	0	531.136	NA	NA	NA	NA	7113416	0	0	0	0	NA mean under detection limit
531.136	C22 H27 O15	22	27	0	15	0	NA	531.136	NA	NA	NA	0	7501390	0	0	0	NA mean under detection limit
531.172	C23 H31 O14	23	31	0	14	0	NA	NA	531.172	NA	NA	0	0	12512376	0	0	NA mean under detection limit
531.172	C23 H31 O14	23	31	0	14	0	531.172	NA	NA	NA	NA	7535315	0	0	0	0	NA mean under detection limit
531.172	C23 H31 O14	23	31	0	14	0	NA	531.172	NA	NA	NA	0	21145174	0	0	0	NA mean under detection limit
531.172	C23 H31 O14	23	31	0	14	0	NA	NA	NA	531.172	NA	0	0	0	2642087	0	NA mean under detection limit
533.042	C19 H17 O18	19	17	0	18	0	NA	NA	NA	533.042	NA	0	0	0	6866532	0	NA mean under detection limit
533.042	C19 H17 O18	19	17	0	18	0	533.042	NA	NA	NA	NA	3727639	0	0	0	0	NA mean under detection limit
533.078	C20 H21 O17	20	21	0	17	0	NA	NA	533.079	NA	NA	0	0	4072044	0	0	NA mean under detection limit
533.078	C20 H21 O17	20	21	0	17	0	533.078	NA	NA	NA	NA	9626914	0	0	0	0	NA mean under detection limit
533.078	C20 H21 O17	20	21	0	17	0	NA	533.078	NA	NA	NA	0	2972690	0	0	0	NA mean under detection limit
533.078	C20 H21 O17	20	21	0	17	0	NA	NA	NA	533.079	NA	0	0	0	4213356	0	NA mean under detection limit
533.115	C21 H25 O16	21	25	0	16	0	NA	NA	533.115	NA	NA	0	0	15847030	0	0	NA mean under detection limit
533.115	C21 H25 O16	21	25	0	16	0	533.115	NA	NA	NA	NA	20235566	0	0	0	0	NA mean under detection limit
533.115	C21 H25 O16	21	25	0	16	0	NA	533.115	NA	NA	NA	0	25307162	0	0	0	NA mean under detection limit
533.115	C21 H25 O16	21	25	0	16	0	NA	NA	NA	533.115	NA	0	0	0	5666421	0	NA mean under detection limit
533.151	C22 H29 O15	22	29	0	15	0	NA	NA	533.151	NA	NA	0	0	6598272	0	0	NA mean under detection limit
533.151	C22 H29 O15	22	29	0	15	0	533.151	NA	NA	NA	NA	11724088	0	0	0	0	NA mean under detection limit
533.151	C22 H29 O15	22	29	0	15	0	NA	533.151	NA	NA	NA	0	11126819	0	0	0	NA mean under detection limit
533.188	C23 H33 O14	23	33	0	14	0	NA	NA	533.188	NA	NA	0	0	17444488	0	0	NA mean under detection limit
533.188	C23 H33 O14	23	33	0	14	0	NA	533.188	NA	NA	NA	0	28420140	0	0	0	NA mean under detection limit
534.165	C22 H32 N O12 S	22	32	1	12	1	NA	534.165	NA	NA	NA	0	2732302	0	0	0	NA mean under detection limit
535.094	C20 H23 O17	20	23	0	17	0	NA	NA	535.094	NA	NA	0	0	4393085	0	0	NA mean under detection limit
535.094	C20 H23 O17	20	23	0	17	0	535.094	NA	NA	NA	NA	19171226	0	0	0	0	NA mean under detection limit
535.094	C20 H23 O17	20	23	0	17	0	NA	535.094	NA	NA	NA	0	3194340	0	0	0	NA mean under detection limit
535.094	C20 H23 O17	20	23	0	17	0	NA	NA	NA	535.094	NA	0	0	0	7524432	0	NA mean under detection limit
535.13	C21 H27 O16	21	27	0	16	0	NA	NA	535.13	NA	NA	0	0	9263238	0	0	NA mean under detection limit
535.13	C21 H27 O16	21	27	0	16	0	535.13	NA	NA	NA	NA	22235044	0	0	0	0	NA mean under detection limit
535.13	C21 H27 O16	21	27	0	16	0	NA	535.13	NA	NA	NA	0	11831789	0	0	0	NA mean under detection limit
535.13	C21 H27 O16	21	27	0	16	0	NA	NA	NA	535.131	NA	0	0	0	6604889	0	NA mean under detection limit
535.143	C29 H27 O8 S	29	27	0	8	1	NA	NA	535.143	NA	NA	0	0	2432137	0	0	NA mean under detection limit
535.143	C29 H27 O8 S	29	27	0	8	1	535.143	NA	NA	NA	NA	2451369	0	0	0	0	NA mean under detection limit
535.167	C22 H31 O15	22	31	0	15	0	NA	NA	535.167	NA	NA	0	0	2722448	0	0	NA mean under detection limit
535.167	C22 H31 O15	22	31	0	15	0	535.167	NA	NA	NA	NA	7262129	0	0	0	0	NA mean under detection limit
535.167	C22 H31 O15	22	31	0	15	0	NA	535.167	NA	NA	NA	0	4014581	0	0	0	NA mean under detection limit
535.182	C26 H31 O12	26	31	0	12	0	535.182	NA	NA	NA	NA	2667445	0	0	0	0	NA mean under detection limit
535.182	C26 H31 O12	26	31	0	12	0	NA	535.182	NA	NA	NA	0	2325497	0	0	0	NA mean under detection limit
536.144	C21 H30 N O13 S	21	30	1	13	1	NA	NA	536.144	NA	NA	0	0	3389839	0	0	NA mean under detection limit
536.144	C21 H30 N O13 S	21	30	1	13	1	536.144	NA	NA	NA	NA	2865381	0	0	0	0	NA mean under detection limit
536.144	C21 H30 N O13 S	21	30	1	13	1	NA	536.144	NA	NA	NA	0	5655255	0	0	0	NA mean under detection limit
536.181	C22 H34 N O12 S	22	34	1	12	1	NA	536.181	NA	NA	NA	0	2495199	0	0	0	NA mean under detection limit
537.198	C26 H33 O12	26	33	0	12	0	NA	537.198	NA	NA	NA	0	2756553	0	0	0	NA mean under detection limit
538.124	C20 H28 N O14 S	20	28	1	14	1	NA	NA	538.124	NA	NA	0	0	2405269	0	0	NA mean under detection limit
538.124	C20 H28 N O14 S	20	28	1	14	1	538.124	NA	NA	NA	NA	4885339	0	0	0	0	NA mean under detection limit
538.124	C20 H28 N O14 S	20	28	1	14	1	NA	538.124	NA	NA	NA	0	2782365	0	0	0	NA mean under detection limit
538.16	C21 H32 N O13 S	21	32	1	13	1	NA	NA	538.16	NA	NA	0	0	4263839	0	0	NA mean under detection limit
538.16	C21 H32 N O13 S	21	32	1	13	1	538.16	NA	NA	NA	NA	5309287	0	0	0	0	NA mean under detection limit
538.16	C21 H32 N O13 S	21	32	1	13	1	NA	538.16	NA	NA	NA	0	5682342	0	0	0	NA mean under detection limit
538.196	C22 H36 N O12 S	22	36	1	12	1	NA	538.196	NA	NA	NA	0	3700910	0	0	0	NA mean under detection limit
539.108	C20 H27 O15 S	20	27	0	15	1	NA	NA	539.108	NA	NA	0	0	14046358	0	0	NA mean under detection limit
539.108	C20 H27 O15 S	20	27	0	15	1	539.108	NA	NA	NA	NA	5010582	0	0	0	0	NA mean under detection limit
539.108	C20 H27 O15 S	20	27	0	15	1	NA	539.108	NA	NA	NA	0	15379839	0	0	0	NA mean under detection limit
539.141	C24 H27 O14	24	27	0	14	0	539.141	NA	NA	NA	NA	3772577	0	0	0	0	NA mean under detection limit
539.141	C24 H27 O14	24	27	0	14	0	NA	539.141	NA	NA	NA	0	2807175	0	0	0	NA mean under detection limit
539.141	C24 H27 O14	24	27	0	14	0	NA	NA	NA	539.141	NA	0	0	0	2884651	0	NA mean under detection limit
539.177	C25 H31 O13	25	31	0	13	0	NA	NA	539.177	NA	NA	0	0	2775208	0	0	NA mean under detection limit
539.177	C25 H31 O13	25	31	0	13	0	539.177	NA	NA	NA	NA	3252396	0	0	0	0	NA mean under detection limit
539.177	C25 H31 O13	25	31	0	13	0	NA	539.177	NA	NA	NA	0	5115279	0	0	0	NA mean under detection limit
540.139	C20 H30 N O14 S	20	30	1	14	1	NA	NA	540.139	NA	NA	0	0	9069987	0	0	NA mean under detection limit
540.139	C20 H30 N O14 S	20	30	1	14	1	540.139	NA	NA	NA	NA	20991458	0	0	0	0	NA mean under detection limit
540.139	C20 H30 N O14 S	20	30	1	14	1	NA	540.139	NA	NA	NA	0	4460140	0	0	0	NA mean under detection limit
540.176	C21 H34 N O13 S	21	34	1	13	1	NA	NA	540.176	NA	NA	0	0	2709933	0	0	NA mean under detection limit
540.176	C21 H34 N O13 S	21	34	1	13	1	NA	540.175	NA	NA	NA	0	2984564	0	0	0	NA mean under detection limit
541.087	C19 H25 O16 S	19	25	0	16	1	541.087	NA	NA	NA	NA	2334484	0	0	0	0	NA mean under detection limit
541.123	C20 H29 O15 S	20	29	0	15	1	NA	NA	541.123	NA	NA	0	0	64038564	0	0	NA mean under detection limit
541.123	C20 H29 O15 S	20	29	0	15	1	541.123	NA	NA	NA	NA	9537312	0	0	0	0	NA mean under detection limit
541.123	C20 H29 O15 S	20	29	0	15	1	NA	541.123	NA	NA	NA	0	86617936	0	0	0	NA mean under detection limit
541.156	C24 H29 O14	24	29	0	14	0	541.156	NA	NA	NA	NA	2839339	0	0	0	0	NA mean under detection limit
541.193	C25 H33 O13	25	33	0	13	0	NA	NA	541.193	NA	NA	0	0	2898614	0	0	NA mean under detection limit
541.193	C25 H33 O13	25	33	0	13	0	541.193	NA	NA	NA	NA	3667767	0	0	0	0	NA mean under detection limit
541.193	C25 H33 O13	25	33	0	13	0	NA	541.193	NA	NA	NA	0	6207325	0	0	0	NA mean under detection limit
543.099	C22 H23 O16	22	23	0	16	0	NA	NA	543.099	NA	NA	0	0	3973287	0	0	NA mean under detection limit
543.099	C22 H23 O16	22	23	0	16	0	543.099	NA	NA	NA	NA	7963043	0	0	0	0	NA mean under detection limit
543.099	C22 H23 O16	22	23	0	16	0	NA	543.099	NA	NA	NA	0	4623634	0	0	0	NA mean under detection limit
543.099	C22 H23 O16	22	23	0	16	0	NA	NA	NA	543.099	NA	0	0	0	3895304	0	NA mean under detection limit
543.136	C23 H27 O15	23	27	0	15	0	NA	NA	543.136	NA	NA	0	0	3522736	0	0	NA mean under detection limit
543.136	C23 H27 O15	23	27	0	15	0	543.136	NA	NA	NA	NA	3781039	0	0	0	0	NA mean under detection limit
543.136	C23 H27 O15	23	27	0	15	0	NA	543.136	NA	NA	NA	0	5726491	0	0	0	NA mean under detection limit
543.172	C24 H31 O14	24	31	0	14	0	NA	NA	543.172	NA	NA	0	0	3806394	0	0	NA mean under detection limit
543.172	C24 H31 O14	24	31	0	14	0	543.172	NA	NA	NA	NA	4102587	0	0	0	0	NA mean under detection limit
543.172	C24 H31 O14	24	31	0	14	0	NA	543.172	NA	NA	NA	0	9085219	0	0	0	NA mean under detection limit
543.208	C25 H35 O13	25	35	0	13	0	NA	543.208	NA	NA	NA	0	3303723	0	0	0	NA mean under detection limit
545.115	C22 H25 O16	22	25	0	16	0	NA	NA	545.115	NA	NA	0	0	8747699	0	0	NA mean under detection limit
545.115	C22 H25 O16	22	25	0	16	0	545.115	NA	NA	NA	NA	8109112	0	0	0	0	NA mean under detection limit
545.115	C22 H25 O16	22	25	0	16	0	NA	545.115	NA	NA	NA	0	12911329	0	0	0	NA mean under detection limit
545.151	C23 H29 O15	23	29	0	15	0	NA	NA	545.151	NA	NA	0	0	5917373	0	0	NA mean under detection limit
545.151	C23 H29 O15	23	29	0	15	0	545.151	NA	NA	NA	NA	9962563	0	0	0	0	NA mean under detection limit
545.151	C23 H29 O15	23	29	0	15	0	NA	545.151	NA	NA	NA	0	9380586	0	0	0	NA mean under detection limit
545.151	C23 H29 O15	23	29	0	15	0	NA	NA	NA	545.151	NA	0	0	0	4352532	0	NA mean under detection limit
545.188	C24 H33 O14	24	33	0	14	0	NA	NA	545.188	NA	NA	0	0	6865606	0	0	NA mean under detection limit
545.188	C24 H33 O14	24	33	0	14	0	545.188	NA	NA	NA	NA	3134543	0	0	0	0	NA mean under detection limit
545.188	C24 H33 O14	24	33	0	14	0	NA	545.188	NA	NA	NA	0	17773298	0	0	0	NA mean under detection limit
547.058	C20 H19 O18	20	19	0	18	0	547.058	NA	NA	NA	NA	2933433	0	0	0	0	NA mean under detection limit
547.094	C21 H23 O17	21	23	0	17	0	NA	NA	547.094	NA	NA	0	0	6923445	0	0	NA mean under detection limit
547.094	C21 H23 O17	21	23	0	17	0	547.094	NA	NA	NA	NA	7532229	0	0	0	0	NA mean under detection limit
547.094	C21 H23 O17	21	23	0	17	0	NA	547.094	NA	NA	NA	0	6001834	0	0	0	NA mean under detection limit
547.13	C22 H27 O16	22	27	0	16	0	NA	NA	547.13	NA	NA	0	0	13049022	0	0	NA mean under detection limit
547.13	C22 H27 O16	22	27	0	16	0	547.13	NA	NA	NA	NA	12322513	0	0	0	0	NA mean under detection limit
547.13	C22 H27 O16	22	27	0	16	0	NA	547.13	NA	NA	NA	0	17708210	0	0	0	NA mean under detection limit
547.13	C22 H27 O16	22	27	0	16	0	NA	NA	NA	547.131	NA	0	0	0	2734100	0	NA mean under detection limit
547.167	C23 H31 O15	23	31	0	15	0	NA	NA	547.167	NA	NA	0	0	7464136	0	0	NA mean under detection limit
547.167	C23 H31 O15	23	31	0	15	0	547.167	NA	NA	NA	NA	6717149	0	0	0	0	NA mean under detection limit
547.167	C23 H31 O15	23	31	0	15	0	NA	547.167	NA	NA	NA	0	8697018	0	0	0	NA mean under detection limit
547.203	C24 H35 O14	24	35	0	14	0	NA	NA	547.203	NA	NA	0	0	3687633	0	0	NA mean under detection limit
547.203	C24 H35 O14	24	35	0	14	0	NA	547.203	NA	NA	NA	0	7894211	0	0	0	NA mean under detection limit
549.073	C20 H21 O18	20	21	0	18	0	NA	NA	NA	549.073	NA	0	0	0	6387219	0	NA mean under detection limit
549.073	C20 H21 O18	20	21	0	18	0	549.073	NA	NA	NA	NA	4719959	0	0	0	0	NA mean under detection limit
549.11	C21 H25 O17	21	25	0	17	0	NA	NA	549.11	NA	NA	0	0	9408191	0	0	NA mean under detection limit
549.11	C21 H25 O17	21	25	0	17	0	549.11	NA	NA	NA	NA	17156452	0	0	0	0	NA mean under detection limit
549.11	C21 H25 O17	21	25	0	17	0	NA	549.11	NA	NA	NA	0	7886461	0	0	0	NA mean under detection limit
549.11	C21 H25 O17	21	25	0	17	0	NA	NA	NA	549.11	NA	0	0	0	2798109	0	NA mean under detection limit
549.146	C22 H29 O16	22	29	0	16	0	NA	NA	549.146	NA	NA	0	0	12848840	0	0	NA mean under detection limit
549.146	C22 H29 O16	22	29	0	16	0	549.146	NA	NA	NA	NA	12220783	0	0	0	0	NA mean under detection limit
549.146	C22 H29 O16	22	29	0	16	0	NA	549.146	NA	NA	NA	0	12662405	0	0	0	NA mean under detection limit
549.182	C23 H33 O15	23	33	0	15	0	NA	NA	549.183	NA	NA	0	0	6440658	0	0	NA mean under detection limit
549.182	C23 H33 O15	23	33	0	15	0	NA	549.182	NA	NA	NA	0	6567566	0	0	0	NA mean under detection limit
550.16	C22 H32 N O13 S	22	32	1	13	1	NA	NA	550.16	NA	NA	0	0	3057614	0	0	NA mean under detection limit
550.16	C22 H32 N O13 S	22	32	1	13	1	NA	550.16	NA	NA	NA	0	4045681	0	0	0	NA mean under detection limit
551.089	C20 H23 O18	20	23	0	18	0	NA	NA	NA	551.089	NA	0	0	0	4526126	0	NA mean under detection limit
551.141	C25 H27 O14	25	27	0	14	0	551.141	NA	NA	NA	NA	2686475	0	0	0	0	NA mean under detection limit
551.213	C27 H35 O12	27	35	0	12	0	NA	551.213	NA	NA	NA	0	2428008	0	0	0	NA mean under detection limit
552.139	C21 H30 N O14 S	21	30	1	14	1	552.139	NA	NA	NA	NA	3331419	0	0	0	0	NA mean under detection limit
552.139	C21 H30 N O14 S	21	30	1	14	1	NA	552.139	NA	NA	NA	0	3773761	0	0	0	NA mean under detection limit
552.176	C22 H34 N O13 S	22	34	1	13	1	NA	NA	552.176	NA	NA	0	0	4039127	0	0	NA mean under detection limit
552.176	C22 H34 N O13 S	22	34	1	13	1	NA	552.176	NA	NA	NA	0	7047498	0	0	0	NA mean under detection limit
553.123	C21 H29 O15 S	21	29	0	15	1	NA	NA	553.123	NA	NA	0	0	5993163	0	0	NA mean under detection limit
553.123	C21 H29 O15 S	21	29	0	15	1	553.123	NA	NA	NA	NA	3028646	0	0	0	0	NA mean under detection limit
553.123	C21 H29 O15 S	21	29	0	15	1	NA	553.123	NA	NA	NA	0	15514153	0	0	0	NA mean under detection limit
553.156	C25 H29 O14	25	29	0	14	0	NA	553.156	NA	NA	NA	0	2954801	0	0	0	NA mean under detection limit
553.193	C26 H33 O13	26	33	0	13	0	NA	553.193	NA	NA	NA	0	3525178	0	0	0	NA mean under detection limit
554.155	C21 H32 N O14 S	21	32	1	14	1	NA	NA	554.155	NA	NA	0	0	11219924	0	0	NA mean under detection limit
554.155	C21 H32 N O14 S	21	32	1	14	1	554.155	NA	NA	NA	NA	7657475	0	0	0	0	NA mean under detection limit
554.155	C21 H32 N O14 S	21	32	1	14	1	NA	554.155	NA	NA	NA	0	17034014	0	0	0	NA mean under detection limit
555.103	C20 H27 O16 S	20	27	0	16	1	NA	NA	555.103	NA	NA	0	0	2898120	0	0	NA mean under detection limit
555.103	C20 H27 O16 S	20	27	0	16	1	555.102	NA	NA	NA	NA	4456773	0	0	0	0	NA mean under detection limit
555.139	C21 H31 O15 S	21	31	0	15	1	NA	NA	555.139	NA	NA	0	0	13075665	0	0	NA mean under detection limit
555.139	C21 H31 O15 S	21	31	0	15	1	NA	555.139	NA	NA	NA	0	66550792	0	0	0	NA mean under detection limit
555.172	C25 H31 O14	25	31	0	14	0	555.172	NA	NA	NA	NA	2615644	0	0	0	0	NA mean under detection limit
555.172	C25 H31 O14	25	31	0	14	0	NA	555.172	NA	NA	NA	0	3011600	0	0	0	NA mean under detection limit
555.208	C26 H35 O13	26	35	0	13	0	NA	555.208	NA	NA	NA	0	2798617	0	0	0	NA mean under detection limit
557.115	C23 H25 O16	23	25	0	16	0	NA	NA	557.115	NA	NA	0	0	4387532	0	0	NA mean under detection limit
557.115	C23 H25 O16	23	25	0	16	0	557.115	NA	NA	NA	NA	3304433	0	0	0	0	NA mean under detection limit
557.115	C23 H25 O16	23	25	0	16	0	NA	557.115	NA	NA	NA	0	5027299	0	0	0	NA mean under detection limit
557.151	C24 H29 O15	24	29	0	15	0	NA	NA	557.151	NA	NA	0	0	3918550	0	0	NA mean under detection limit
557.151	C24 H29 O15	24	29	0	15	0	557.151	NA	NA	NA	NA	9348093	0	0	0	0	NA mean under detection limit
557.151	C24 H29 O15	24	29	0	15	0	NA	557.151	NA	NA	NA	0	4992492	0	0	0	NA mean under detection limit
557.151	C24 H29 O15	24	29	0	15	0	NA	NA	NA	557.151	NA	0	0	0	5590715	0	NA mean under detection limit
557.188	C25 H33 O14	25	33	0	14	0	NA	557.188	NA	NA	NA	0	5641717	0	0	0	NA mean under detection limit
559.094	C22 H23 O17	22	23	0	17	0	559.094	NA	NA	NA	NA	4283030	0	0	0	0	NA mean under detection limit
559.094	C22 H23 O17	22	23	0	17	0	NA	NA	NA	559.094	NA	0	0	0	2559209	0	NA mean under detection limit
559.13	C23 H27 O16	23	27	0	16	0	NA	NA	559.131	NA	NA	0	0	5089488	0	0	NA mean under detection limit
559.13	C23 H27 O16	23	27	0	16	0	559.13	NA	NA	NA	NA	5275298	0	0	0	0	NA mean under detection limit
559.13	C23 H27 O16	23	27	0	16	0	NA	559.13	NA	NA	NA	0	7376846	0	0	0	NA mean under detection limit
559.13	C23 H27 O16	23	27	0	16	0	NA	NA	NA	559.13	NA	0	0	0	2277108	0	NA mean under detection limit
559.167	C24 H31 O15	24	31	0	15	0	NA	NA	559.167	NA	NA	0	0	5437657	0	0	NA mean under detection limit
559.167	C24 H31 O15	24	31	0	15	0	559.167	NA	NA	NA	NA	5988014	0	0	0	0	NA mean under detection limit
559.167	C24 H31 O15	24	31	0	15	0	NA	559.167	NA	NA	NA	0	7440343	0	0	0	NA mean under detection limit
559.203	C25 H35 O14	25	35	0	14	0	NA	559.203	NA	NA	NA	0	8093664	0	0	0	NA mean under detection limit
561.073	C21 H21 O18	21	21	0	18	0	NA	NA	561.073	NA	NA	0	0	10029760	0	0	NA mean under detection limit
561.073	C21 H21 O18	21	21	0	18	0	561.073	NA	NA	NA	NA	26339644	0	0	0	0	NA mean under detection limit
561.073	C21 H21 O18	21	21	0	18	0	NA	561.073	NA	NA	NA	0	6881710	0	0	0	NA mean under detection limit
561.073	C21 H21 O18	21	21	0	18	0	NA	NA	NA	561.073	NA	0	0	0	12239660	0	NA mean under detection limit
561.11	C22 H25 O17	22	25	0	17	0	NA	NA	561.11	NA	NA	0	0	6468297	0	0	NA mean under detection limit
561.11	C22 H25 O17	22	25	0	17	0	561.11	NA	NA	NA	NA	11696457	0	0	0	0	NA mean under detection limit
561.11	C22 H25 O17	22	25	0	17	0	NA	561.11	NA	NA	NA	0	5849527	0	0	0	NA mean under detection limit
561.11	C22 H25 O17	22	25	0	17	0	NA	NA	NA	561.11	NA	0	0	0	4256567	0	NA mean under detection limit
561.146	C23 H29 O16	23	29	0	16	0	NA	NA	561.146	NA	NA	0	0	8026834	0	0	NA mean under detection limit
561.146	C23 H29 O16	23	29	0	16	0	561.146	NA	NA	NA	NA	11233621	0	0	0	0	NA mean under detection limit
561.146	C23 H29 O16	23	29	0	16	0	NA	561.146	NA	NA	NA	0	10887616	0	0	0	NA mean under detection limit
561.146	C23 H29 O16	23	29	0	16	0	NA	NA	NA	561.146	NA	0	0	0	3279682	0	NA mean under detection limit
561.182	C24 H33 O15	24	33	0	15	0	NA	NA	561.183	NA	NA	0	0	5141212	0	0	NA mean under detection limit
561.182	C24 H33 O15	24	33	0	15	0	561.182	NA	NA	NA	NA	2719074	0	0	0	0	NA mean under detection limit
561.182	C24 H33 O15	24	33	0	15	0	NA	561.183	NA	NA	NA	0	6197705	0	0	0	NA mean under detection limit
563.089	C21 H23 O18	21	23	0	18	0	NA	NA	563.089	NA	NA	0	0	3884225	0	0	NA mean under detection limit
563.089	C21 H23 O18	21	23	0	18	0	563.089	NA	NA	NA	NA	9554930	0	0	0	0	NA mean under detection limit
563.089	C21 H23 O18	21	23	0	18	0	NA	563.089	NA	NA	NA	0	3337127	0	0	0	NA mean under detection limit
563.089	C21 H23 O18	21	23	0	18	0	NA	NA	NA	563.089	NA	0	0	0	5715334	0	NA mean under detection limit
563.125	C22 H27 O17	22	27	0	17	0	NA	NA	563.125	NA	NA	0	0	6954186	0	0	NA mean under detection limit
563.125	C22 H27 O17	22	27	0	17	0	563.125	NA	NA	NA	NA	7005183	0	0	0	0	NA mean under detection limit
563.125	C22 H27 O17	22	27	0	17	0	NA	563.125	NA	NA	NA	0	10331056	0	0	0	NA mean under detection limit
563.125	C22 H27 O17	22	27	0	17	0	NA	NA	NA	563.125	NA	0	0	0	2743697	0	NA mean under detection limit
563.162	C23 H31 O16	23	31	0	16	0	NA	NA	563.162	NA	NA	0	0	10751187	0	0	NA mean under detection limit
563.162	C23 H31 O16	23	31	0	16	0	563.162	NA	NA	NA	NA	22096908	0	0	0	0	NA mean under detection limit
563.162	C23 H31 O16	23	31	0	16	0	NA	563.162	NA	NA	NA	0	12428218	0	0	0	NA mean under detection limit
563.162	C23 H31 O16	23	31	0	16	0	NA	NA	NA	563.162	NA	0	0	0	8627612	0	NA mean under detection limit
563.198	C24 H35 O15	24	35	0	15	0	NA	563.198	NA	NA	NA	0	4357059	0	0	0	NA mean under detection limit
564.176	C23 H34 N O13 S	23	34	1	13	1	NA	564.176	NA	NA	NA	0	2745531	0	0	0	NA mean under detection limit
566.155	C22 H32 N O14 S	22	32	1	14	1	566.155	NA	NA	NA	NA	3046423	0	0	0	0	NA mean under detection limit
566.155	C22 H32 N O14 S	22	32	1	14	1	NA	566.155	NA	NA	NA	0	2391737	0	0	0	NA mean under detection limit
566.191	C23 H36 N O13 S	23	36	1	13	1	NA	566.191	NA	NA	NA	0	4400834	0	0	0	NA mean under detection limit
567.139	C22 H31 O15 S	22	31	0	15	1	NA	567.139	NA	NA	NA	0	6033338	0	0	0	NA mean under detection limit
567.172	C26 H31 O14	26	31	0	14	0	567.172	NA	NA	NA	NA	2689911	0	0	0	0	NA mean under detection limit
567.172	C26 H31 O14	26	31	0	14	0	NA	NA	NA	567.172	NA	0	0	0	2454127	0	NA mean under detection limit
568.134	C21 H30 N O15 S	21	30	1	15	1	568.134	NA	NA	NA	NA	2355909	0	0	0	0	NA mean under detection limit
568.171	C22 H34 N O14 S	22	34	1	14	1	NA	NA	568.171	NA	NA	0	0	4907463	0	0	NA mean under detection limit
568.171	C22 H34 N O14 S	22	34	1	14	1	568.17	NA	NA	NA	NA	3627730	0	0	0	0	NA mean under detection limit
568.171	C22 H34 N O14 S	22	34	1	14	1	NA	568.171	NA	NA	NA	0	12740809	0	0	0	NA mean under detection limit
569.118	C21 H29 O16 S	21	29	0	16	1	NA	NA	569.118	NA	NA	0	0	2601653	0	0	NA mean under detection limit
569.151	C25 H29 O15	25	29	0	15	0	569.151	NA	NA	NA	NA	3774503	0	0	0	0	NA mean under detection limit
569.151	C25 H29 O15	25	29	0	15	0	NA	NA	NA	569.151	NA	0	0	0	2451684	0	NA mean under detection limit
569.155	C22 H33 O15 S	22	33	0	15	1	NA	569.155	NA	NA	NA	0	21891536	0	0	0	NA mean under detection limit
569.188	C26 H33 O14	26	33	0	14	0	NA	569.188	NA	NA	NA	0	2334168	0	0	0	NA mean under detection limit
570.113	C20 H28 N O16 S	20	28	1	16	1	NA	NA	NA	570.114	NA	0	0	0	2691099	0	NA mean under detection limit
571.097	C20 H27 O17 S	20	27	0	17	1	571.097	NA	NA	NA	NA	2534604	0	0	0	0	NA mean under detection limit
571.13	C24 H27 O16	24	27	0	16	0	NA	NA	571.131	NA	NA	0	0	2329774	0	0	NA mean under detection limit
571.13	C24 H27 O16	24	27	0	16	0	NA	571.13	NA	NA	NA	0	5989349	0	0	0	NA mean under detection limit
571.167	C25 H31 O15	25	31	0	15	0	NA	NA	571.167	NA	NA	0	0	4609208	0	0	NA mean under detection limit
571.167	C25 H31 O15	25	31	0	15	0	571.167	NA	NA	NA	NA	4201188	0	0	0	0	NA mean under detection limit
571.167	C25 H31 O15	25	31	0	15	0	NA	571.167	NA	NA	NA	0	6931439	0	0	0	NA mean under detection limit
571.203	C26 H35 O14	26	35	0	14	0	NA	571.203	NA	NA	NA	0	2717689	0	0	0	NA mean under detection limit
573.11	C23 H25 O17	23	25	0	17	0	NA	NA	573.11	NA	NA	0	0	2724510	0	0	NA mean under detection limit
573.11	C23 H25 O17	23	25	0	17	0	573.11	NA	NA	NA	NA	3558793	0	0	0	0	NA mean under detection limit
573.146	C24 H29 O16	24	29	0	16	0	NA	NA	573.146	NA	NA	0	0	3212967	0	0	NA mean under detection limit
573.146	C24 H29 O16	24	29	0	16	0	573.146	NA	NA	NA	NA	3407254	0	0	0	0	NA mean under detection limit
573.146	C24 H29 O16	24	29	0	16	0	NA	573.146	NA	NA	NA	0	5514769	0	0	0	NA mean under detection limit
573.182	C25 H33 O15	25	33	0	15	0	NA	NA	573.183	NA	NA	0	0	4488880	0	0	NA mean under detection limit
573.182	C25 H33 O15	25	33	0	15	0	573.182	NA	NA	NA	NA	2682275	0	0	0	0	NA mean under detection limit
573.182	C25 H33 O15	25	33	0	15	0	NA	573.182	NA	NA	NA	0	6239771	0	0	0	NA mean under detection limit
575.089	C22 H23 O18	22	23	0	18	0	NA	NA	575.089	NA	NA	0	0	12687499	0	0	NA mean under detection limit
575.089	C22 H23 O18	22	23	0	18	0	575.089	NA	NA	NA	NA	13122620	0	0	0	0	NA mean under detection limit
575.089	C22 H23 O18	22	23	0	18	0	NA	575.089	NA	NA	NA	0	14917685	0	0	0	NA mean under detection limit
575.089	C22 H23 O18	22	23	0	18	0	NA	NA	NA	575.089	NA	0	0	0	4732055	0	NA mean under detection limit
575.125	C23 H27 O17	23	27	0	17	0	NA	NA	575.125	NA	NA	0	0	7569556	0	0	NA mean under detection limit
575.125	C23 H27 O17	23	27	0	17	0	575.125	NA	NA	NA	NA	7062601	0	0	0	0	NA mean under detection limit
575.125	C23 H27 O17	23	27	0	17	0	NA	575.125	NA	NA	NA	0	7686207	0	0	0	NA mean under detection limit
575.125	C23 H27 O17	23	27	0	17	0	NA	NA	NA	575.125	NA	0	0	0	2334883	0	NA mean under detection limit
575.162	C24 H31 O16	24	31	0	16	0	NA	NA	575.162	NA	NA	0	0	6842525	0	0	NA mean under detection limit
575.162	C24 H31 O16	24	31	0	16	0	575.162	NA	NA	NA	NA	15486037	0	0	0	0	NA mean under detection limit
575.162	C24 H31 O16	24	31	0	16	0	NA	575.162	NA	NA	NA	0	9142346	0	0	0	NA mean under detection limit
575.162	C24 H31 O16	24	31	0	16	0	NA	NA	NA	575.162	NA	0	0	0	7957679	0	NA mean under detection limit
575.198	C25 H35 O15	25	35	0	15	0	NA	NA	575.198	NA	NA	0	0	3154086	0	0	NA mean under detection limit
575.198	C25 H35 O15	25	35	0	15	0	NA	575.198	NA	NA	NA	0	4663380	0	0	0	NA mean under detection limit
577.105	C22 H25 O18	22	25	0	18	0	NA	NA	577.105	NA	NA	0	0	9149056	0	0	NA mean under detection limit
577.105	C22 H25 O18	22	25	0	18	0	577.105	NA	NA	NA	NA	25657084	0	0	0	0	NA mean under detection limit
577.105	C22 H25 O18	22	25	0	18	0	NA	577.105	NA	NA	NA	0	9073273	0	0	0	NA mean under detection limit
577.105	C22 H25 O18	22	25	0	18	0	NA	NA	NA	577.105	NA	0	0	0	9983824	0	NA mean under detection limit
577.141	C23 H29 O17	23	29	0	17	0	NA	NA	577.141	NA	NA	0	0	7510665	0	0	NA mean under detection limit
577.141	C23 H29 O17	23	29	0	17	0	577.141	NA	NA	NA	NA	7896841	0	0	0	0	NA mean under detection limit
577.141	C23 H29 O17	23	29	0	17	0	NA	577.141	NA	NA	NA	0	12468868	0	0	0	NA mean under detection limit
577.177	C24 H33 O16	24	33	0	16	0	NA	NA	577.177	NA	NA	0	0	9509522	0	0	NA mean under detection limit
577.177	C24 H33 O16	24	33	0	16	0	577.177	NA	NA	NA	NA	17760022	0	0	0	0	NA mean under detection limit
577.177	C24 H33 O16	24	33	0	16	0	NA	577.177	NA	NA	NA	0	12116622	0	0	0	NA mean under detection limit
578.191	C24 H36 N O13 S	24	36	1	13	1	NA	578.191	NA	NA	NA	0	2692023	0	0	0	NA mean under detection limit
578.479	C35 H64 N O5	35	64	1	5	0	578.479	NA	NA	NA	NA	2369756	0	0	0	0	NA mean under detection limit
578.479	C35 H64 N O5	35	64	1	5	0	NA	NA	NA	578.479	NA	0	0	0	3417396	0	NA mean under detection limit
579.084	C21 H23 O19	21	23	0	19	0	NA	NA	NA	579.084	NA	0	0	0	12270091	0	NA mean under detection limit
579.084	C21 H23 O19	21	23	0	19	0	579.084	NA	NA	NA	NA	3444143	0	0	0	0	NA mean under detection limit
579.103	C22 H27 O16 S	22	27	0	16	1	579.103	NA	NA	NA	NA	2661814	0	0	0	0	NA mean under detection limit
579.12	C22 H27 O18	22	27	0	18	0	NA	NA	579.12	NA	NA	0	0	10865780	0	0	NA mean under detection limit
579.12	C22 H27 O18	22	27	0	18	0	579.12	NA	NA	NA	NA	43753916	0	0	0	0	NA mean under detection limit
579.12	C22 H27 O18	22	27	0	18	0	NA	579.12	NA	NA	NA	0	4734153	0	0	0	NA mean under detection limit
579.12	C22 H27 O18	22	27	0	18	0	NA	NA	NA	579.12	NA	0	0	0	17472024	0	NA mean under detection limit
579.157	C23 H31 O17	23	31	0	17	0	NA	579.157	NA	NA	NA	0	2414804	0	0	0	NA mean under detection limit
579.172	C27 H31 O14	27	31	0	14	0	579.172	NA	NA	NA	NA	2722254	0	0	0	0	NA mean under detection limit
580.171	C23 H34 N O14 S	23	34	1	14	1	NA	NA	580.171	NA	NA	0	0	3045753	0	0	NA mean under detection limit
580.171	C23 H34 N O14 S	23	34	1	14	1	580.17	NA	NA	NA	NA	3356459	0	0	0	0	NA mean under detection limit
580.171	C23 H34 N O14 S	23	34	1	14	1	NA	580.171	NA	NA	NA	0	4230658	0	0	0	NA mean under detection limit
580.207	C24 H38 N O13 S	24	38	1	13	1	NA	580.207	NA	NA	NA	0	3697165	0	0	0	NA mean under detection limit
581.188	C27 H33 O14	27	33	0	14	0	NA	581.187	NA	NA	NA	0	2682676	0	0	0	NA mean under detection limit
582.113	C21 H28 N O16 S	21	28	1	16	1	582.113	NA	NA	NA	NA	3329491	0	0	0	0	NA mean under detection limit
582.15	C22 H32 N O15 S	22	32	1	15	1	582.15	NA	NA	NA	NA	3219936	0	0	0	0	NA mean under detection limit
582.15	C22 H32 N O15 S	22	32	1	15	1	NA	582.15	NA	NA	NA	0	2414680	0	0	0	NA mean under detection limit
582.186	C23 H36 N O14 S	23	36	1	14	1	NA	NA	582.186	NA	NA	0	0	3707757	0	0	NA mean under detection limit
582.186	C23 H36 N O14 S	23	36	1	14	1	582.186	NA	NA	NA	NA	2558444	0	0	0	0	NA mean under detection limit
582.186	C23 H36 N O14 S	23	36	1	14	1	NA	582.186	NA	NA	NA	0	7024739	0	0	0	NA mean under detection limit
583.097	C21 H27 O17 S	21	27	0	17	1	583.097	NA	NA	NA	NA	15284011	0	0	0	0	NA mean under detection limit
583.097	C21 H27 O17 S	21	27	0	17	1	NA	NA	NA	583.098	NA	0	0	0	6610874	0	NA mean under detection limit
583.134	C22 H31 O16 S	22	31	0	16	1	NA	583.134	NA	NA	NA	0	3275140	0	0	0	NA mean under detection limit
583.167	C26 H31 O15	26	31	0	15	0	NA	NA	583.167	NA	NA	0	0	2395232	0	0	NA mean under detection limit
583.167	C26 H31 O15	26	31	0	15	0	583.167	NA	NA	NA	NA	3178308	0	0	0	0	NA mean under detection limit
583.167	C26 H31 O15	26	31	0	15	0	NA	583.167	NA	NA	NA	0	3579278	0	0	0	NA mean under detection limit
583.17	C23 H35 O15 S	23	35	0	15	1	NA	583.17	NA	NA	NA	0	3844496	0	0	0	NA mean under detection limit
584.129	C21 H30 N O16 S	21	30	1	16	1	584.129	NA	NA	NA	NA	2915988	0	0	0	0	NA mean under detection limit
585.11	C24 H25 O17	24	25	0	17	0	NA	585.11	NA	NA	NA	0	2529255	0	0	0	NA mean under detection limit
585.113	C21 H29 O17 S	21	29	0	17	1	585.113	NA	NA	NA	NA	113666544	0	0	0	0	NA mean under detection limit
585.113	C21 H29 O17 S	21	29	0	17	1	NA	585.113	NA	NA	NA	0	3315688	0	0	0	NA mean under detection limit
585.113	C21 H29 O17 S	21	29	0	17	1	NA	NA	NA	585.113	NA	0	0	0	61620900	0	NA mean under detection limit
585.146	C25 H29 O16	25	29	0	16	0	NA	NA	585.146	NA	NA	0	0	2374220	0	0	NA mean under detection limit
585.146	C25 H29 O16	25	29	0	16	0	NA	585.146	NA	NA	NA	0	4422643	0	0	0	NA mean under detection limit
585.182	C26 H33 O15	26	33	0	15	0	NA	NA	585.183	NA	NA	0	0	3949141	0	0	NA mean under detection limit
585.182	C26 H33 O15	26	33	0	15	0	NA	585.182	NA	NA	NA	0	8928254	0	0	0	NA mean under detection limit
587.089	C23 H23 O18	23	23	0	18	0	587.089	NA	NA	NA	NA	4684961	0	0	0	0	NA mean under detection limit
587.089	C23 H23 O18	23	23	0	18	0	NA	587.089	NA	NA	NA	0	2924116	0	0	0	NA mean under detection limit
587.089	C23 H23 O18	23	23	0	18	0	NA	NA	NA	587.089	NA	0	0	0	4024718	0	NA mean under detection limit
587.125	C24 H27 O17	24	27	0	17	0	NA	NA	587.125	NA	NA	0	0	4190266	0	0	NA mean under detection limit
587.125	C24 H27 O17	24	27	0	17	0	587.125	NA	NA	NA	NA	5899438	0	0	0	0	NA mean under detection limit
587.125	C24 H27 O17	24	27	0	17	0	NA	587.125	NA	NA	NA	0	5520992	0	0	0	NA mean under detection limit
587.162	C25 H31 O16	25	31	0	16	0	NA	NA	587.162	NA	NA	0	0	4826179	0	0	NA mean under detection limit
587.162	C25 H31 O16	25	31	0	16	0	587.162	NA	NA	NA	NA	6419643	0	0	0	0	NA mean under detection limit
587.162	C25 H31 O16	25	31	0	16	0	NA	587.162	NA	NA	NA	0	8429163	0	0	0	NA mean under detection limit
587.162	C25 H31 O16	25	31	0	16	0	NA	NA	NA	587.162	NA	0	0	0	3916201	0	NA mean under detection limit
587.198	C26 H35 O15	26	35	0	15	0	NA	NA	587.198	NA	NA	0	0	4891724	0	0	NA mean under detection limit
587.198	C26 H35 O15	26	35	0	15	0	587.198	NA	NA	NA	NA	2426055	0	0	0	0	NA mean under detection limit
587.198	C26 H35 O15	26	35	0	15	0	NA	587.198	NA	NA	NA	0	10268279	0	0	0	NA mean under detection limit
589.105	C23 H25 O18	23	25	0	18	0	NA	NA	589.105	NA	NA	0	0	12686890	0	0	NA mean under detection limit
589.105	C23 H25 O18	23	25	0	18	0	589.105	NA	NA	NA	NA	16568163	0	0	0	0	NA mean under detection limit
589.105	C23 H25 O18	23	25	0	18	0	NA	589.105	NA	NA	NA	0	22855894	0	0	0	NA mean under detection limit
589.105	C23 H25 O18	23	25	0	18	0	NA	NA	NA	589.105	NA	0	0	0	6582414	0	NA mean under detection limit
589.141	C24 H29 O17	24	29	0	17	0	NA	NA	589.141	NA	NA	0	0	7308851	0	0	NA mean under detection limit
589.141	C24 H29 O17	24	29	0	17	0	589.141	NA	NA	NA	NA	7538544	0	0	0	0	NA mean under detection limit
589.141	C24 H29 O17	24	29	0	17	0	NA	589.141	NA	NA	NA	0	13664481	0	0	0	NA mean under detection limit
589.177	C25 H33 O16	25	33	0	16	0	NA	NA	589.177	NA	NA	0	0	14571068	0	0	NA mean under detection limit
589.177	C25 H33 O16	25	33	0	16	0	589.177	NA	NA	NA	NA	10907516	0	0	0	0	NA mean under detection limit
589.177	C25 H33 O16	25	33	0	16	0	NA	589.177	NA	NA	NA	0	16113900	0	0	0	NA mean under detection limit
589.214	C26 H37 O15	26	37	0	15	0	NA	589.214	NA	NA	NA	0	3172600	0	0	0	NA mean under detection limit
591.12	C23 H27 O18	23	27	0	18	0	NA	NA	591.12	NA	NA	0	0	17258534	0	0	NA mean under detection limit
591.12	C23 H27 O18	23	27	0	18	0	591.12	NA	NA	NA	NA	19108388	0	0	0	0	NA mean under detection limit
591.12	C23 H27 O18	23	27	0	18	0	NA	591.12	NA	NA	NA	0	19653470	0	0	0	NA mean under detection limit
591.12	C23 H27 O18	23	27	0	18	0	NA	NA	NA	591.12	NA	0	0	0	4729751	0	NA mean under detection limit
591.157	C24 H31 O17	24	31	0	17	0	NA	NA	591.157	NA	NA	0	0	7102511	0	0	NA mean under detection limit
591.157	C24 H31 O17	24	31	0	17	0	591.157	NA	NA	NA	NA	5966386	0	0	0	0	NA mean under detection limit
591.157	C24 H31 O17	24	31	0	17	0	NA	591.157	NA	NA	NA	0	11158378	0	0	0	NA mean under detection limit
591.193	C25 H35 O16	25	35	0	16	0	NA	NA	591.193	NA	NA	0	0	22124600	0	0	NA mean under detection limit
591.193	C25 H35 O16	25	35	0	16	0	591.193	NA	NA	NA	NA	6363711	0	0	0	0	NA mean under detection limit
591.193	C25 H35 O16	25	35	0	16	0	NA	591.193	NA	NA	NA	0	15803254	0	0	0	NA mean under detection limit
592.171	C24 H34 N O14 S	24	34	1	14	1	NA	592.171	NA	NA	NA	0	3023027	0	0	0	NA mean under detection limit
593.1	C22 H25 O19	22	25	0	19	0	593.1	NA	NA	NA	NA	5606619	0	0	0	0	NA mean under detection limit
593.1	C22 H25 O19	22	25	0	19	0	NA	NA	NA	593.1	NA	0	0	0	3101338	0	NA mean under detection limit
593.136	C23 H29 O18	23	29	0	18	0	NA	NA	593.136	NA	NA	0	0	22870564	0	0	NA mean under detection limit
593.136	C23 H29 O18	23	29	0	18	0	593.136	NA	NA	NA	NA	18830568	0	0	0	0	NA mean under detection limit
593.136	C23 H29 O18	23	29	0	18	0	NA	593.136	NA	NA	NA	0	23102958	0	0	0	NA mean under detection limit
593.136	C23 H29 O18	23	29	0	18	0	NA	NA	NA	593.136	NA	0	0	0	2926249	0	NA mean under detection limit
593.172	C24 H33 O17	24	33	0	17	0	NA	NA	593.172	NA	NA	0	0	2557486	0	0	NA mean under detection limit
593.172	C24 H33 O17	24	33	0	17	0	NA	593.172	NA	NA	NA	0	3061243	0	0	0	NA mean under detection limit
594.186	C24 H36 N O14 S	24	36	1	14	1	NA	NA	594.186	NA	NA	0	0	3373873	0	0	NA mean under detection limit
594.186	C24 H36 N O14 S	24	36	1	14	1	NA	594.186	NA	NA	NA	0	6494024	0	0	0	NA mean under detection limit
595.134	C23 H31 O16 S	23	31	0	16	1	NA	595.134	NA	NA	NA	0	2722944	0	0	0	NA mean under detection limit
595.203	C28 H35 O14	28	35	0	14	0	595.203	NA	NA	NA	NA	2785211	0	0	0	0	NA mean under detection limit
595.203	C28 H35 O14	28	35	0	14	0	NA	595.203	NA	NA	NA	0	3073175	0	0	0	NA mean under detection limit
596.129	C22 H30 N O16 S	22	30	1	16	1	596.129	NA	NA	NA	NA	3471616	0	0	0	0	NA mean under detection limit
596.129	C22 H30 N O16 S	22	30	1	16	1	NA	596.129	NA	NA	NA	0	2821578	0	0	0	NA mean under detection limit
596.165	C23 H34 N O15 S	23	34	1	15	1	596.165	NA	NA	NA	NA	4213005	0	0	0	0	NA mean under detection limit
596.165	C23 H34 N O15 S	23	34	1	15	1	NA	596.165	NA	NA	NA	0	4327894	0	0	0	NA mean under detection limit
596.202	C24 H38 N O14 S	24	38	1	14	1	NA	NA	596.202	NA	NA	0	0	3499319	0	0	NA mean under detection limit
596.202	C24 H38 N O14 S	24	38	1	14	1	NA	596.202	NA	NA	NA	0	6564323	0	0	0	NA mean under detection limit
597.113	C22 H29 O17 S	22	29	0	17	1	NA	NA	597.113	NA	NA	0	0	8113698	0	0	NA mean under detection limit
597.113	C22 H29 O17 S	22	29	0	17	1	597.113	NA	NA	NA	NA	18913880	0	0	0	0	NA mean under detection limit
597.113	C22 H29 O17 S	22	29	0	17	1	NA	597.113	NA	NA	NA	0	4365074	0	0	0	NA mean under detection limit
597.182	C27 H33 O15	27	33	0	15	0	597.183	NA	NA	NA	NA	4285041	0	0	0	0	NA mean under detection limit
597.182	C27 H33 O15	27	33	0	15	0	NA	597.183	NA	NA	NA	0	4293417	0	0	0	NA mean under detection limit
599.092	C21 H27 O18 S	21	27	0	18	1	599.092	NA	NA	NA	NA	2916621	0	0	0	0	NA mean under detection limit
599.129	C22 H31 O17 S	22	31	0	17	1	NA	NA	599.129	NA	NA	0	0	67264560	0	0	NA mean under detection limit
599.129	C22 H31 O17 S	22	31	0	17	1	599.129	NA	NA	NA	NA	86474008	0	0	0	0	NA mean under detection limit
599.129	C22 H31 O17 S	22	31	0	17	1	NA	599.129	NA	NA	NA	0	25750966	0	0	0	NA mean under detection limit
599.129	C22 H31 O17 S	22	31	0	17	1	NA	NA	NA	599.129	NA	0	0	0	5539824	0	NA mean under detection limit
599.131	C18 H31 O22	18	31	0	22	0	NA	599.131	NA	NA	NA	0	3919286	0	0	0	NA mean under detection limit
599.198	C27 H35 O15	27	35	0	15	0	NA	599.198	NA	NA	NA	0	6063565	0	0	0	NA mean under detection limit
601.105	C24 H25 O18	24	25	0	18	0	NA	NA	601.105	NA	NA	0	0	2675256	0	0	NA mean under detection limit
601.105	C24 H25 O18	24	25	0	18	0	601.105	NA	NA	NA	NA	2741198	0	0	0	0	NA mean under detection limit
601.105	C24 H25 O18	24	25	0	18	0	NA	601.105	NA	NA	NA	0	4028496	0	0	0	NA mean under detection limit
601.141	C25 H29 O17	25	29	0	17	0	NA	NA	601.141	NA	NA	0	0	3117633	0	0	NA mean under detection limit
601.141	C25 H29 O17	25	29	0	17	0	601.141	NA	NA	NA	NA	3069914	0	0	0	0	NA mean under detection limit
601.141	C25 H29 O17	25	29	0	17	0	NA	601.141	NA	NA	NA	0	5496925	0	0	0	NA mean under detection limit
601.177	C26 H33 O16	26	33	0	16	0	NA	NA	601.178	NA	NA	0	0	4131403	0	0	NA mean under detection limit
601.177	C26 H33 O16	26	33	0	16	0	601.177	NA	NA	NA	NA	3093479	0	0	0	0	NA mean under detection limit
601.177	C26 H33 O16	26	33	0	16	0	NA	601.177	NA	NA	NA	0	7131241	0	0	0	NA mean under detection limit
601.214	C27 H37 O15	27	37	0	15	0	NA	601.214	NA	NA	NA	0	3654773	0	0	0	NA mean under detection limit
601.323	C30 H49 O12	30	49	0	12	0	601.323	NA	NA	NA	NA	4579354	0	0	0	0	NA mean under detection limit
603.12	C24 H27 O18	24	27	0	18	0	NA	NA	603.12	NA	NA	0	0	8303697	0	0	NA mean under detection limit
603.12	C24 H27 O18	24	27	0	18	0	603.12	NA	NA	NA	NA	9650831	0	0	0	0	NA mean under detection limit
603.12	C24 H27 O18	24	27	0	18	0	NA	603.12	NA	NA	NA	0	14140157	0	0	0	NA mean under detection limit
603.12	C24 H27 O18	24	27	0	18	0	NA	NA	NA	603.12	NA	0	0	0	3089976	0	NA mean under detection limit
603.157	C25 H31 O17	25	31	0	17	0	NA	NA	603.157	NA	NA	0	0	3897435	0	0	NA mean under detection limit
603.157	C25 H31 O17	25	31	0	17	0	603.157	NA	NA	NA	NA	3953308	0	0	0	0	NA mean under detection limit
603.157	C25 H31 O17	25	31	0	17	0	NA	603.157	NA	NA	NA	0	9736969	0	0	0	NA mean under detection limit
603.193	C26 H35 O16	26	35	0	16	0	NA	NA	603.193	NA	NA	0	0	9122916	0	0	NA mean under detection limit
603.193	C26 H35 O16	26	35	0	16	0	603.193	NA	NA	NA	NA	5571240	0	0	0	0	NA mean under detection limit
603.193	C26 H35 O16	26	35	0	16	0	NA	603.193	NA	NA	NA	0	15913750	0	0	0	NA mean under detection limit
605.063	C22 H21 O20	22	21	0	20	0	NA	NA	NA	605.063	NA	0	0	0	11489611	0	NA mean under detection limit
605.063	C22 H21 O20	22	21	0	20	0	NA	NA	605.063	NA	NA	0	0	2904670	0	0	NA mean under detection limit
605.063	C22 H21 O20	22	21	0	20	0	605.063	NA	NA	NA	NA	14947638	0	0	0	0	NA mean under detection limit
605.063	C22 H21 O20	22	21	0	20	0	NA	605.063	NA	NA	NA	0	2508181	0	0	0	NA mean under detection limit
605.1	C23 H25 O19	23	25	0	19	0	NA	NA	605.1	NA	NA	0	0	3575399	0	0	NA mean under detection limit
605.1	C23 H25 O19	23	25	0	19	0	605.1	NA	NA	NA	NA	9717059	0	0	0	0	NA mean under detection limit
605.1	C23 H25 O19	23	25	0	19	0	NA	NA	NA	605.1	NA	0	0	0	5624154	0	NA mean under detection limit
605.136	C24 H29 O18	24	29	0	18	0	NA	NA	605.136	NA	NA	0	0	11724401	0	0	NA mean under detection limit
605.136	C24 H29 O18	24	29	0	18	0	605.136	NA	NA	NA	NA	12977487	0	0	0	0	NA mean under detection limit
605.136	C24 H29 O18	24	29	0	18	0	NA	605.136	NA	NA	NA	0	20952494	0	0	0	NA mean under detection limit
605.136	C24 H29 O18	24	29	0	18	0	NA	NA	NA	605.136	NA	0	0	0	4465001	0	NA mean under detection limit
605.172	C25 H33 O17	25	33	0	17	0	NA	NA	605.172	NA	NA	0	0	5576315	0	0	NA mean under detection limit
605.172	C25 H33 O17	25	33	0	17	0	605.172	NA	NA	NA	NA	8852828	0	0	0	0	NA mean under detection limit
605.172	C25 H33 O17	25	33	0	17	0	NA	605.172	NA	NA	NA	0	8095162	0	0	0	NA mean under detection limit
605.172	C25 H33 O17	25	33	0	17	0	NA	NA	NA	605.172	NA	0	0	0	2847096	0	NA mean under detection limit
605.209	C26 H37 O16	26	37	0	16	0	NA	NA	605.209	NA	NA	0	0	16631429	0	0	NA mean under detection limit
605.209	C26 H37 O16	26	37	0	16	0	NA	605.209	NA	NA	NA	0	31299014	0	0	0	NA mean under detection limit
607.079	C22 H23 O20	22	23	0	20	0	NA	NA	NA	607.079	NA	0	0	0	3538047	0	NA mean under detection limit
607.115	C23 H27 O19	23	27	0	19	0	NA	NA	607.115	NA	NA	0	0	3310736	0	0	NA mean under detection limit
607.115	C23 H27 O19	23	27	0	19	0	607.115	NA	NA	NA	NA	13010947	0	0	0	0	NA mean under detection limit
607.115	C23 H27 O19	23	27	0	19	0	NA	607.115	NA	NA	NA	0	3363925	0	0	0	NA mean under detection limit
607.115	C23 H27 O19	23	27	0	19	0	NA	NA	NA	607.115	NA	0	0	0	4514958	0	NA mean under detection limit
607.152	C24 H31 O18	24	31	0	18	0	NA	NA	607.152	NA	NA	0	0	12535961	0	0	NA mean under detection limit
607.152	C24 H31 O18	24	31	0	18	0	607.152	NA	NA	NA	NA	9435152	0	0	0	0	NA mean under detection limit
607.152	C24 H31 O18	24	31	0	18	0	NA	607.152	NA	NA	NA	0	26417250	0	0	0	NA mean under detection limit
607.152	C24 H31 O18	24	31	0	18	0	NA	NA	NA	607.152	NA	0	0	0	2929820	0	NA mean under detection limit
607.188	C25 H35 O17	25	35	0	17	0	607.188	NA	NA	NA	NA	5388317	0	0	0	0	NA mean under detection limit
607.188	C25 H35 O17	25	35	0	17	0	NA	607.188	NA	NA	NA	0	2515054	0	0	0	NA mean under detection limit
608.129	C23 H30 N O16 S	23	30	1	16	1	NA	608.129	NA	NA	NA	0	2588082	0	0	0	NA mean under detection limit
608.202	C25 H38 N O14 S	25	38	1	14	1	NA	608.202	NA	NA	NA	0	3429836	0	0	0	NA mean under detection limit
610.145	C23 H32 N O16 S	23	32	1	16	1	610.145	NA	NA	NA	NA	4044837	0	0	0	0	NA mean under detection limit
610.145	C23 H32 N O16 S	23	32	1	16	1	NA	610.145	NA	NA	NA	0	2732138	0	0	0	NA mean under detection limit
610.181	C24 H36 N O15 S	24	36	1	15	1	NA	NA	610.181	NA	NA	0	0	3205095	0	0	NA mean under detection limit
610.181	C24 H36 N O15 S	24	36	1	15	1	610.181	NA	NA	NA	NA	3348529	0	0	0	0	NA mean under detection limit
610.181	C24 H36 N O15 S	24	36	1	15	1	NA	610.181	NA	NA	NA	0	4258935	0	0	0	NA mean under detection limit
610.217	C25 H40 N O14 S	25	40	1	14	1	NA	610.217	NA	NA	NA	0	3779716	0	0	0	NA mean under detection limit
611.129	C23 H31 O17 S	23	31	0	17	1	NA	NA	611.129	NA	NA	0	0	8457460	0	0	NA mean under detection limit
611.129	C23 H31 O17 S	23	31	0	17	1	611.129	NA	NA	NA	NA	3809660	0	0	0	0	NA mean under detection limit
611.129	C23 H31 O17 S	23	31	0	17	1	NA	611.129	NA	NA	NA	0	9801151	0	0	0	NA mean under detection limit
611.162	C27 H31 O16	27	31	0	16	0	NA	NA	NA	611.162	NA	0	0	0	2471679	0	NA mean under detection limit
612.16	C23 H34 N O16 S	23	34	1	16	1	612.16	NA	NA	NA	NA	3236579	0	0	0	0	NA mean under detection limit
613.144	C23 H33 O17 S	23	33	0	17	1	NA	NA	613.144	NA	NA	0	0	51867448	0	0	NA mean under detection limit
613.144	C23 H33 O17 S	23	33	0	17	1	613.144	NA	NA	NA	NA	9429050	0	0	0	0	NA mean under detection limit
613.144	C23 H33 O17 S	23	33	0	17	1	NA	613.144	NA	NA	NA	0	59162744	0	0	0	NA mean under detection limit
613.147	C19 H33 O22	19	33	0	22	0	NA	NA	613.147	NA	NA	0	0	8081208	0	0	NA mean under detection limit
613.147	C19 H33 O22	19	33	0	22	0	NA	613.147	NA	NA	NA	0	8421498	0	0	0	NA mean under detection limit
615.12	C25 H27 O18	25	27	0	18	0	NA	NA	615.12	NA	NA	0	0	2548088	0	0	NA mean under detection limit
615.12	C25 H27 O18	25	27	0	18	0	615.12	NA	NA	NA	NA	2767594	0	0	0	0	NA mean under detection limit
615.12	C25 H27 O18	25	27	0	18	0	NA	615.12	NA	NA	NA	0	3353383	0	0	0	NA mean under detection limit
615.157	C26 H31 O17	26	31	0	17	0	NA	NA	615.157	NA	NA	0	0	2664835	0	0	NA mean under detection limit
615.157	C26 H31 O17	26	31	0	17	0	NA	615.157	NA	NA	NA	0	3600179	0	0	0	NA mean under detection limit
615.193	C27 H35 O16	27	35	0	16	0	615.193	NA	NA	NA	NA	2792195	0	0	0	0	NA mean under detection limit
615.193	C27 H35 O16	27	35	0	16	0	NA	615.193	NA	NA	NA	0	4741952	0	0	0	NA mean under detection limit
617.1	C24 H25 O19	24	25	0	19	0	617.099	NA	NA	NA	NA	2766234	0	0	0	0	NA mean under detection limit
617.136	C25 H29 O18	25	29	0	18	0	NA	NA	617.136	NA	NA	0	0	5092304	0	0	NA mean under detection limit
617.136	C25 H29 O18	25	29	0	18	0	617.136	NA	NA	NA	NA	4875686	0	0	0	0	NA mean under detection limit
617.136	C25 H29 O18	25	29	0	18	0	NA	617.136	NA	NA	NA	0	7927267	0	0	0	NA mean under detection limit
617.172	C26 H33 O17	26	33	0	17	0	NA	NA	617.172	NA	NA	0	0	2602971	0	0	NA mean under detection limit
617.172	C26 H33 O17	26	33	0	17	0	617.172	NA	NA	NA	NA	5285299	0	0	0	0	NA mean under detection limit
617.172	C26 H33 O17	26	33	0	17	0	NA	617.172	NA	NA	NA	0	4693487	0	0	0	NA mean under detection limit
617.172	C26 H33 O17	26	33	0	17	0	NA	NA	NA	617.172	NA	0	0	0	3877008	0	NA mean under detection limit
617.209	C27 H37 O16	27	37	0	16	0	NA	NA	617.209	NA	NA	0	0	3452902	0	0	NA mean under detection limit
617.209	C27 H37 O16	27	37	0	16	0	NA	617.209	NA	NA	NA	0	8390140	0	0	0	NA mean under detection limit
619.079	C23 H23 O20	23	23	0	20	0	NA	NA	619.079	NA	NA	0	0	3566109	0	0	NA mean under detection limit
619.079	C23 H23 O20	23	23	0	20	0	619.079	NA	NA	NA	NA	5673033	0	0	0	0	NA mean under detection limit
619.079	C23 H23 O20	23	23	0	20	0	NA	619.079	NA	NA	NA	0	4849797	0	0	0	NA mean under detection limit
619.115	C24 H27 O19	24	27	0	19	0	NA	NA	619.115	NA	NA	0	0	3070504	0	0	NA mean under detection limit
619.115	C24 H27 O19	24	27	0	19	0	619.115	NA	NA	NA	NA	5048405	0	0	0	0	NA mean under detection limit
619.115	C24 H27 O19	24	27	0	19	0	NA	619.115	NA	NA	NA	0	4708497	0	0	0	NA mean under detection limit
619.152	C25 H31 O18	25	31	0	18	0	NA	NA	619.152	NA	NA	0	0	6997555	0	0	NA mean under detection limit
619.152	C25 H31 O18	25	31	0	18	0	619.152	NA	NA	NA	NA	6371426	0	0	0	0	NA mean under detection limit
619.152	C25 H31 O18	25	31	0	18	0	NA	619.152	NA	NA	NA	0	10827934	0	0	0	NA mean under detection limit
619.188	C26 H35 O17	26	35	0	17	0	NA	NA	619.188	NA	NA	0	0	4353598	0	0	NA mean under detection limit
619.188	C26 H35 O17	26	35	0	17	0	619.188	NA	NA	NA	NA	3650670	0	0	0	0	NA mean under detection limit
619.188	C26 H35 O17	26	35	0	17	0	NA	619.188	NA	NA	NA	0	5208235	0	0	0	NA mean under detection limit
619.224	C27 H39 O16	27	39	0	16	0	NA	619.224	NA	NA	NA	0	7579831	0	0	0	NA mean under detection limit
621.094	C23 H25 O20	23	25	0	20	0	621.094	NA	NA	NA	NA	8387331	0	0	0	0	NA mean under detection limit
621.094	C23 H25 O20	23	25	0	20	0	NA	NA	NA	621.095	NA	0	0	0	6859460	0	NA mean under detection limit
621.131	C24 H29 O19	24	29	0	19	0	NA	NA	621.131	NA	NA	0	0	5423255	0	0	NA mean under detection limit
621.131	C24 H29 O19	24	29	0	19	0	621.131	NA	NA	NA	NA	7947024	0	0	0	0	NA mean under detection limit
621.131	C24 H29 O19	24	29	0	19	0	NA	621.131	NA	NA	NA	0	5657420	0	0	0	NA mean under detection limit
621.131	C24 H29 O19	24	29	0	19	0	NA	NA	NA	621.131	NA	0	0	0	3119827	0	NA mean under detection limit
621.167	C25 H33 O18	25	33	0	18	0	NA	NA	621.167	NA	NA	0	0	5003426	0	0	NA mean under detection limit
621.167	C25 H33 O18	25	33	0	18	0	621.167	NA	NA	NA	NA	4031261	0	0	0	0	NA mean under detection limit
621.167	C25 H33 O18	25	33	0	18	0	NA	621.167	NA	NA	NA	0	12147544	0	0	0	NA mean under detection limit
621.204	C26 H37 O17	26	37	0	17	0	NA	NA	621.204	NA	NA	0	0	3992749	0	0	NA mean under detection limit
621.204	C26 H37 O17	26	37	0	17	0	NA	621.203	NA	NA	NA	0	4442981	0	0	0	NA mean under detection limit
623.11	C23 H27 O20	23	27	0	20	0	623.11	NA	NA	NA	NA	7933373	0	0	0	0	NA mean under detection limit
623.11	C23 H27 O20	23	27	0	20	0	NA	NA	NA	623.11	NA	0	0	0	11935215	0	NA mean under detection limit
624.16	C24 H34 N O16 S	24	34	1	16	1	NA	624.16	NA	NA	NA	0	2572131	0	0	0	NA mean under detection limit
624.197	C25 H38 N O15 S	25	38	1	15	1	NA	624.197	NA	NA	NA	0	3470192	0	0	0	NA mean under detection limit
625.144	C24 H33 O17 S	24	33	0	17	1	NA	NA	625.144	NA	NA	0	0	4226453	0	0	NA mean under detection limit
625.144	C24 H33 O17 S	24	33	0	17	1	NA	625.144	NA	NA	NA	0	11620534	0	0	0	NA mean under detection limit
626.212	C25 H40 N O15 S	25	40	1	15	1	NA	626.212	NA	NA	NA	0	2770469	0	0	0	NA mean under detection limit
627.124	C23 H31 O18 S	23	31	0	18	1	627.124	NA	NA	NA	NA	2484006	0	0	0	0	NA mean under detection limit
627.16	C24 H35 O17 S	24	35	0	17	1	NA	NA	627.16	NA	NA	0	0	14229547	0	0	NA mean under detection limit
627.16	C24 H35 O17 S	24	35	0	17	1	NA	627.16	NA	NA	NA	0	60117868	0	0	0	NA mean under detection limit
627.163	C20 H35 O22	20	35	0	22	0	NA	627.162	NA	NA	NA	0	9130859	0	0	0	NA mean under detection limit
629.136	C26 H29 O18	26	29	0	18	0	NA	NA	629.136	NA	NA	0	0	3036867	0	0	NA mean under detection limit
629.136	C26 H29 O18	26	29	0	18	0	629.136	NA	NA	NA	NA	2565595	0	0	0	0	NA mean under detection limit
629.172	C27 H33 O17	27	33	0	17	0	629.172	NA	NA	NA	NA	5848552	0	0	0	0	NA mean under detection limit
629.172	C27 H33 O17	27	33	0	17	0	NA	629.172	NA	NA	NA	0	3302939	0	0	0	NA mean under detection limit
629.172	C27 H33 O17	27	33	0	17	0	NA	NA	NA	629.172	NA	0	0	0	6508373	0	NA mean under detection limit
629.209	C28 H37 O16	28	37	0	16	0	NA	629.209	NA	NA	NA	0	3679783	0	0	0	NA mean under detection limit
631.079	C24 H23 O20	24	23	0	20	0	NA	NA	NA	631.079	NA	0	0	0	2608701	0	NA mean under detection limit
631.115	C25 H27 O19	25	27	0	19	0	631.115	NA	NA	NA	NA	3756163	0	0	0	0	NA mean under detection limit
631.115	C25 H27 O19	25	27	0	19	0	NA	NA	NA	631.115	NA	0	0	0	2766411	0	NA mean under detection limit
631.152	C26 H31 O18	26	31	0	18	0	NA	NA	631.152	NA	NA	0	0	3325303	0	0	NA mean under detection limit
631.152	C26 H31 O18	26	31	0	18	0	631.151	NA	NA	NA	NA	4032655	0	0	0	0	NA mean under detection limit
631.152	C26 H31 O18	26	31	0	18	0	NA	631.152	NA	NA	NA	0	6629564	0	0	0	NA mean under detection limit
631.188	C27 H35 O17	27	35	0	17	0	NA	NA	631.188	NA	NA	0	0	3592579	0	0	NA mean under detection limit
631.188	C27 H35 O17	27	35	0	17	0	631.188	NA	NA	NA	NA	4105372	0	0	0	0	NA mean under detection limit
631.188	C27 H35 O17	27	35	0	17	0	NA	631.188	NA	NA	NA	0	3569864	0	0	0	NA mean under detection limit
631.224	C28 H39 O16	28	39	0	16	0	NA	NA	631.224	NA	NA	0	0	2582928	0	0	NA mean under detection limit
631.224	C28 H39 O16	28	39	0	16	0	NA	631.224	NA	NA	NA	0	4624597	0	0	0	NA mean under detection limit
633.094	C24 H25 O20	24	25	0	20	0	NA	NA	633.095	NA	NA	0	0	7772192	0	0	NA mean under detection limit
633.094	C24 H25 O20	24	25	0	20	0	633.094	NA	NA	NA	NA	17935146	0	0	0	0	NA mean under detection limit
633.094	C24 H25 O20	24	25	0	20	0	NA	633.094	NA	NA	NA	0	9321293	0	0	0	NA mean under detection limit
633.094	C24 H25 O20	24	25	0	20	0	NA	NA	NA	633.094	NA	0	0	0	11410761	0	NA mean under detection limit
633.131	C25 H29 O19	25	29	0	19	0	NA	NA	633.131	NA	NA	0	0	5031981	0	0	NA mean under detection limit
633.131	C25 H29 O19	25	29	0	19	0	633.131	NA	NA	NA	NA	7291702	0	0	0	0	NA mean under detection limit
633.131	C25 H29 O19	25	29	0	19	0	NA	633.131	NA	NA	NA	0	7318361	0	0	0	NA mean under detection limit
633.131	C25 H29 O19	25	29	0	19	0	NA	NA	NA	633.131	NA	0	0	0	4390231	0	NA mean under detection limit
633.167	C26 H33 O18	26	33	0	18	0	NA	NA	633.167	NA	NA	0	0	6023226	0	0	NA mean under detection limit
633.167	C26 H33 O18	26	33	0	18	0	633.167	NA	NA	NA	NA	7899971	0	0	0	0	NA mean under detection limit
633.167	C26 H33 O18	26	33	0	18	0	NA	633.167	NA	NA	NA	0	9206629	0	0	0	NA mean under detection limit
633.167	C26 H33 O18	26	33	0	18	0	NA	NA	NA	633.167	NA	0	0	0	3498341	0	NA mean under detection limit
633.204	C27 H37 O17	27	37	0	17	0	NA	NA	633.204	NA	NA	0	0	5089351	0	0	NA mean under detection limit
633.204	C27 H37 O17	27	37	0	17	0	NA	633.204	NA	NA	NA	0	7046002	0	0	0	NA mean under detection limit
635.11	C24 H27 O20	24	27	0	20	0	NA	NA	635.11	NA	NA	0	0	7025392	0	0	NA mean under detection limit
635.11	C24 H27 O20	24	27	0	20	0	635.11	NA	NA	NA	NA	12443100	0	0	0	0	NA mean under detection limit
635.11	C24 H27 O20	24	27	0	20	0	NA	635.11	NA	NA	NA	0	7171571	0	0	0	NA mean under detection limit
635.11	C24 H27 O20	24	27	0	20	0	NA	NA	NA	635.11	NA	0	0	0	4780111	0	NA mean under detection limit
635.147	C25 H31 O19	25	31	0	19	0	NA	NA	635.146	NA	NA	0	0	7127806	0	0	NA mean under detection limit
635.147	C25 H31 O19	25	31	0	19	0	635.146	NA	NA	NA	NA	6510057	0	0	0	0	NA mean under detection limit
635.147	C25 H31 O19	25	31	0	19	0	NA	635.146	NA	NA	NA	0	10862079	0	0	0	NA mean under detection limit
635.183	C26 H35 O18	26	35	0	18	0	NA	NA	635.183	NA	NA	0	0	4217611	0	0	NA mean under detection limit
635.183	C26 H35 O18	26	35	0	18	0	635.183	NA	NA	NA	NA	19705334	0	0	0	0	NA mean under detection limit
635.183	C26 H35 O18	26	35	0	18	0	NA	635.183	NA	NA	NA	0	7058955	0	0	0	NA mean under detection limit
635.183	C26 H35 O18	26	35	0	18	0	NA	NA	NA	635.183	NA	0	0	0	11833451	0	NA mean under detection limit
635.219	C27 H39 O17	27	39	0	17	0	NA	635.219	NA	NA	NA	0	4900375	0	0	0	NA mean under detection limit
637.126	C24 H29 O20	24	29	0	20	0	637.126	NA	NA	NA	NA	4640911	0	0	0	0	NA mean under detection limit
637.126	C24 H29 O20	24	29	0	20	0	NA	637.126	NA	NA	NA	0	3662997	0	0	0	NA mean under detection limit
637.126	C24 H29 O20	24	29	0	20	0	NA	NA	NA	637.126	NA	0	0	0	2735953	0	NA mean under detection limit
638.176	C25 H36 N O16 S	25	36	1	16	1	NA	NA	638.176	NA	NA	0	0	2585425	0	0	NA mean under detection limit
638.176	C25 H36 N O16 S	25	36	1	16	1	638.176	NA	NA	NA	NA	4084215	0	0	0	0	NA mean under detection limit
638.176	C25 H36 N O16 S	25	36	1	16	1	NA	638.176	NA	NA	NA	0	4381171	0	0	0	NA mean under detection limit
638.212	C26 H40 N O15 S	26	40	1	15	1	NA	NA	638.212	NA	NA	0	0	2580319	0	0	NA mean under detection limit
638.212	C26 H40 N O15 S	26	40	1	15	1	NA	638.212	NA	NA	NA	0	4794879	0	0	0	NA mean under detection limit
639.16	C25 H35 O17 S	25	35	0	17	1	NA	639.16	NA	NA	NA	0	9220922	0	0	0	NA mean under detection limit
639.193	C29 H35 O16	29	35	0	16	0	639.193	NA	NA	NA	NA	2855764	0	0	0	0	NA mean under detection limit
639.193	C29 H35 O16	29	35	0	16	0	NA	NA	NA	639.193	NA	0	0	0	3281509	0	NA mean under detection limit
640.155	C24 H34 N O17 S	24	34	1	17	1	640.155	NA	NA	NA	NA	2608286	0	0	0	0	NA mean under detection limit
640.155	C24 H34 N O17 S	24	34	1	17	1	NA	640.155	NA	NA	NA	0	2650245	0	0	0	NA mean under detection limit
640.192	C25 H38 N O16 S	25	38	1	16	1	NA	NA	640.192	NA	NA	0	0	2737729	0	0	NA mean under detection limit
640.192	C25 H38 N O16 S	25	38	1	16	1	640.192	NA	NA	NA	NA	4543659	0	0	0	0	NA mean under detection limit
640.192	C25 H38 N O16 S	25	38	1	16	1	NA	640.192	NA	NA	NA	0	4594833	0	0	0	NA mean under detection limit
641.172	C28 H33 O17	28	33	0	17	0	641.172	NA	NA	NA	NA	3718652	0	0	0	0	NA mean under detection limit
641.172	C28 H33 O17	28	33	0	17	0	NA	NA	NA	641.172	NA	0	0	0	2970966	0	NA mean under detection limit
641.176	C25 H37 O17 S	25	37	0	17	1	NA	641.176	NA	NA	NA	0	39527896	0	0	0	NA mean under detection limit
643.119	C23 H31 O19 S	23	31	0	19	1	643.119	NA	NA	NA	NA	2761883	0	0	0	0	NA mean under detection limit
643.152	C27 H31 O18	27	31	0	18	0	NA	643.152	NA	NA	NA	0	3273828	0	0	0	NA mean under detection limit
643.188	C28 H35 O17	28	35	0	17	0	NA	NA	643.188	NA	NA	0	0	2786995	0	0	NA mean under detection limit
643.188	C28 H35 O17	28	35	0	17	0	643.188	NA	NA	NA	NA	4040883	0	0	0	0	NA mean under detection limit
643.188	C28 H35 O17	28	35	0	17	0	NA	643.188	NA	NA	NA	0	5312625	0	0	0	NA mean under detection limit
643.224	C29 H39 O16	29	39	0	16	0	NA	643.224	NA	NA	NA	0	3271805	0	0	0	NA mean under detection limit
645.131	C26 H29 O19	26	29	0	19	0	NA	NA	645.131	NA	NA	0	0	3384735	0	0	NA mean under detection limit
645.131	C26 H29 O19	26	29	0	19	0	645.131	NA	NA	NA	NA	3013459	0	0	0	0	NA mean under detection limit
645.131	C26 H29 O19	26	29	0	19	0	NA	645.131	NA	NA	NA	0	5008113	0	0	0	NA mean under detection limit
645.167	C27 H33 O18	27	33	0	18	0	NA	NA	645.167	NA	NA	0	0	3916205	0	0	NA mean under detection limit
645.167	C27 H33 O18	27	33	0	18	0	645.167	NA	NA	NA	NA	3269471	0	0	0	0	NA mean under detection limit
645.167	C27 H33 O18	27	33	0	18	0	NA	645.167	NA	NA	NA	0	6136573	0	0	0	NA mean under detection limit
645.204	C28 H37 O17	28	37	0	17	0	NA	NA	645.204	NA	NA	0	0	3481019	0	0	NA mean under detection limit
645.204	C28 H37 O17	28	37	0	17	0	NA	645.204	NA	NA	NA	0	5513993	0	0	0	NA mean under detection limit
645.24	C29 H41 O16	29	41	0	16	0	NA	645.24	NA	NA	NA	0	3989269	0	0	0	NA mean under detection limit
647.11	C25 H27 O20	25	27	0	20	0	NA	NA	647.11	NA	NA	0	0	9911457	0	0	NA mean under detection limit
647.11	C25 H27 O20	25	27	0	20	0	647.11	NA	NA	NA	NA	13012482	0	0	0	0	NA mean under detection limit
647.11	C25 H27 O20	25	27	0	20	0	NA	647.11	NA	NA	NA	0	13671804	0	0	0	NA mean under detection limit
647.11	C25 H27 O20	25	27	0	20	0	NA	NA	NA	647.11	NA	0	0	0	4651572	0	NA mean under detection limit
647.147	C26 H31 O19	26	31	0	19	0	NA	NA	647.147	NA	NA	0	0	5602479	0	0	NA mean under detection limit
647.147	C26 H31 O19	26	31	0	19	0	647.147	NA	NA	NA	NA	6299151	0	0	0	0	NA mean under detection limit
647.147	C26 H31 O19	26	31	0	19	0	NA	647.146	NA	NA	NA	0	8084872	0	0	0	NA mean under detection limit
647.147	C26 H31 O19	26	31	0	19	0	NA	NA	NA	647.147	NA	0	0	0	2660930	0	NA mean under detection limit
647.183	C27 H35 O18	27	35	0	18	0	NA	NA	647.183	NA	NA	0	0	6761662	0	0	NA mean under detection limit
647.183	C27 H35 O18	27	35	0	18	0	647.183	NA	NA	NA	NA	13635099	0	0	0	0	NA mean under detection limit
647.183	C27 H35 O18	27	35	0	18	0	NA	647.183	NA	NA	NA	0	8764820	0	0	0	NA mean under detection limit
647.183	C27 H35 O18	27	35	0	18	0	NA	NA	NA	647.183	NA	0	0	0	7725648	0	NA mean under detection limit
647.219	C28 H39 O17	28	39	0	17	0	NA	NA	647.219	NA	NA	0	0	3652812	0	0	NA mean under detection limit
647.219	C28 H39 O17	28	39	0	17	0	NA	647.219	NA	NA	NA	0	6098336	0	0	0	NA mean under detection limit
649.089	C24 H25 O21	24	25	0	21	0	649.089	NA	NA	NA	NA	2886838	0	0	0	0	NA mean under detection limit
649.126	C25 H29 O20	25	29	0	20	0	NA	NA	649.126	NA	NA	0	0	9326520	0	0	NA mean under detection limit
649.126	C25 H29 O20	25	29	0	20	0	649.126	NA	NA	NA	NA	24281282	0	0	0	0	NA mean under detection limit
649.126	C25 H29 O20	25	29	0	20	0	NA	649.126	NA	NA	NA	0	13672465	0	0	0	NA mean under detection limit
649.126	C25 H29 O20	25	29	0	20	0	NA	NA	NA	649.126	NA	0	0	0	9098560	0	NA mean under detection limit
649.162	C26 H33 O19	26	33	0	19	0	NA	NA	649.162	NA	NA	0	0	6037447	0	0	NA mean under detection limit
649.162	C26 H33 O19	26	33	0	19	0	649.162	NA	NA	NA	NA	8581327	0	0	0	0	NA mean under detection limit
649.162	C26 H33 O19	26	33	0	19	0	NA	649.162	NA	NA	NA	0	10674205	0	0	0	NA mean under detection limit
649.199	C27 H37 O18	27	37	0	18	0	NA	NA	649.199	NA	NA	0	0	6232021	0	0	NA mean under detection limit
649.199	C27 H37 O18	27	37	0	18	0	649.198	NA	NA	NA	NA	16613596	0	0	0	0	NA mean under detection limit
649.199	C27 H37 O18	27	37	0	18	0	NA	649.199	NA	NA	NA	0	6733866	0	0	0	NA mean under detection limit
649.235	C28 H41 O17	28	41	0	17	0	NA	649.235	NA	NA	NA	0	3186741	0	0	0	NA mean under detection limit
650.5	C38 H68 N O7	38	68	1	7	0	650.5	NA	NA	NA	NA	4940453	0	0	0	0	NA mean under detection limit
650.5	C38 H68 N O7	38	68	1	7	0	NA	NA	NA	650.5	NA	0	0	0	7788376	0	NA mean under detection limit
651.105	C24 H27 O21	24	27	0	21	0	651.105	NA	NA	NA	NA	6677370	0	0	0	0	NA mean under detection limit
651.105	C24 H27 O21	24	27	0	21	0	NA	NA	NA	651.105	NA	0	0	0	8362053	0	NA mean under detection limit
651.124	C25 H31 O18 S	25	31	0	18	1	651.124	NA	NA	NA	NA	3220353	0	0	0	0	NA mean under detection limit
651.141	C25 H31 O20	25	31	0	20	0	NA	NA	651.141	NA	NA	0	0	2488022	0	0	NA mean under detection limit
651.141	C25 H31 O20	25	31	0	20	0	651.141	NA	NA	NA	NA	9945991	0	0	0	0	NA mean under detection limit
651.141	C25 H31 O20	25	31	0	20	0	NA	651.142	NA	NA	NA	0	5896871	0	0	0	NA mean under detection limit
651.141	C25 H31 O20	25	31	0	20	0	NA	NA	NA	651.141	NA	0	0	0	4178003	0	NA mean under detection limit
652.119	C24 H30 N O18 S	24	30	1	18	1	NA	NA	NA	652.119	NA	0	0	0	2721236	0	NA mean under detection limit
652.192	C26 H38 N O16 S	26	38	1	16	1	NA	652.192	NA	NA	NA	0	3625982	0	0	0	NA mean under detection limit
652.228	C27 H42 N O15 S	27	42	1	15	1	NA	652.228	NA	NA	NA	0	3589130	0	0	0	NA mean under detection limit
653.176	C26 H37 O17 S	26	37	0	17	1	NA	653.176	NA	NA	NA	0	3272001	0	0	0	NA mean under detection limit
654.135	C24 H32 N O18 S	24	32	1	18	1	654.134	NA	NA	NA	NA	3208109	0	0	0	0	NA mean under detection limit
654.171	C25 H36 N O17 S	25	36	1	17	1	NA	654.171	NA	NA	NA	0	2695815	0	0	0	NA mean under detection limit
654.207	C26 H40 N O16 S	26	40	1	16	1	NA	NA	654.207	NA	NA	0	0	3014557	0	0	NA mean under detection limit
654.207	C26 H40 N O16 S	26	40	1	16	1	654.207	NA	NA	NA	NA	2875335	0	0	0	0	NA mean under detection limit
654.207	C26 H40 N O16 S	26	40	1	16	1	NA	654.207	NA	NA	NA	0	5293715	0	0	0	NA mean under detection limit
655.119	C24 H31 O19 S	24	31	0	19	1	655.119	NA	NA	NA	NA	16738573	0	0	0	0	NA mean under detection limit
655.119	C24 H31 O19 S	24	31	0	19	1	NA	NA	NA	655.119	NA	0	0	0	7177856	0	NA mean under detection limit
655.155	C25 H35 O18 S	25	35	0	18	1	NA	655.155	NA	NA	NA	0	3469257	0	0	0	NA mean under detection limit
655.191	C26 H39 O17 S	26	39	0	17	1	NA	655.191	NA	NA	NA	0	8902613	0	0	0	NA mean under detection limit
657.131	C27 H29 O19	27	29	0	19	0	NA	NA	NA	657.131	NA	0	0	0	6468017	0	NA mean under detection limit
657.134	C24 H33 O19 S	24	33	0	19	1	657.134	NA	NA	NA	NA	99601376	0	0	0	0	NA mean under detection limit
657.134	C24 H33 O19 S	24	33	0	19	1	NA	657.134	NA	NA	NA	0	3400273	0	0	0	NA mean under detection limit
657.134	C24 H33 O19 S	24	33	0	19	1	NA	NA	NA	657.134	NA	0	0	0	70562224	0	NA mean under detection limit
657.137	C20 H33 O24	20	33	0	24	0	657.137	NA	NA	NA	NA	15731684	0	0	0	0	NA mean under detection limit
657.167	C28 H33 O18	28	33	0	18	0	NA	657.167	NA	NA	NA	0	2771548	0	0	0	NA mean under detection limit
657.204	C29 H37 O17	29	37	0	17	0	NA	NA	657.204	NA	NA	0	0	2887760	0	0	NA mean under detection limit
657.204	C29 H37 O17	29	37	0	17	0	NA	657.204	NA	NA	NA	0	5298792	0	0	0	NA mean under detection limit
657.204	C29 H37 O17	29	37	0	17	0	NA	NA	NA	657.204	NA	0	0	0	2980303	0	NA mean under detection limit
659.11	C26 H27 O20	26	27	0	20	0	659.11	NA	NA	NA	NA	4163250	0	0	0	0	NA mean under detection limit
659.147	C27 H31 O19	27	31	0	19	0	NA	NA	659.146	NA	NA	0	0	3482462	0	0	NA mean under detection limit
659.147	C27 H31 O19	27	31	0	19	0	659.147	NA	NA	NA	NA	2706111	0	0	0	0	NA mean under detection limit
659.147	C27 H31 O19	27	31	0	19	0	NA	659.146	NA	NA	NA	0	5493989	0	0	0	NA mean under detection limit
659.183	C28 H35 O18	28	35	0	18	0	NA	NA	659.183	NA	NA	0	0	3054445	0	0	NA mean under detection limit
659.183	C28 H35 O18	28	35	0	18	0	659.183	NA	NA	NA	NA	4243149	0	0	0	0	NA mean under detection limit
659.183	C28 H35 O18	28	35	0	18	0	NA	659.183	NA	NA	NA	0	5221617	0	0	0	NA mean under detection limit
659.183	C28 H35 O18	28	35	0	18	0	NA	NA	NA	659.183	NA	0	0	0	3168512	0	NA mean under detection limit
659.219	C29 H39 O17	29	39	0	17	0	NA	NA	659.219	NA	NA	0	0	3137404	0	0	NA mean under detection limit
659.219	C29 H39 O17	29	39	0	17	0	NA	659.219	NA	NA	NA	0	5604605	0	0	0	NA mean under detection limit
661.126	C26 H29 O20	26	29	0	20	0	NA	NA	661.126	NA	NA	0	0	7930493	0	0	NA mean under detection limit
661.126	C26 H29 O20	26	29	0	20	0	661.126	NA	NA	NA	NA	11653526	0	0	0	0	NA mean under detection limit
661.126	C26 H29 O20	26	29	0	20	0	NA	661.126	NA	NA	NA	0	15175535	0	0	0	NA mean under detection limit
661.126	C26 H29 O20	26	29	0	20	0	NA	NA	NA	661.126	NA	0	0	0	4857905	0	NA mean under detection limit
661.162	C27 H33 O19	27	33	0	19	0	NA	NA	661.162	NA	NA	0	0	4686476	0	0	NA mean under detection limit
661.162	C27 H33 O19	27	33	0	19	0	661.162	NA	NA	NA	NA	5206436	0	0	0	0	NA mean under detection limit
661.162	C27 H33 O19	27	33	0	19	0	NA	661.162	NA	NA	NA	0	7214971	0	0	0	NA mean under detection limit
661.199	C28 H37 O18	28	37	0	18	0	NA	NA	661.199	NA	NA	0	0	8127130	0	0	NA mean under detection limit
661.199	C28 H37 O18	28	37	0	18	0	661.199	NA	NA	NA	NA	6697394	0	0	0	0	NA mean under detection limit
661.199	C28 H37 O18	28	37	0	18	0	NA	661.199	NA	NA	NA	0	8621959	0	0	0	NA mean under detection limit
661.235	C29 H41 O17	29	41	0	17	0	NA	661.235	NA	NA	NA	0	3860371	0	0	0	NA mean under detection limit
663.141	C26 H31 O20	26	31	0	20	0	NA	NA	663.141	NA	NA	0	0	11437482	0	0	NA mean under detection limit
663.141	C26 H31 O20	26	31	0	20	0	663.141	NA	NA	NA	NA	10040451	0	0	0	0	NA mean under detection limit
663.141	C26 H31 O20	26	31	0	20	0	NA	663.141	NA	NA	NA	0	14635526	0	0	0	NA mean under detection limit
663.141	C26 H31 O20	26	31	0	20	0	NA	NA	NA	663.141	NA	0	0	0	3925905	0	NA mean under detection limit
663.178	C27 H35 O19	27	35	0	19	0	NA	NA	663.178	NA	NA	0	0	4462009	0	0	NA mean under detection limit
663.178	C27 H35 O19	27	35	0	19	0	663.178	NA	NA	NA	NA	4570257	0	0	0	0	NA mean under detection limit
663.178	C27 H35 O19	27	35	0	19	0	NA	663.178	NA	NA	NA	0	7930387	0	0	0	NA mean under detection limit
663.214	C28 H39 O18	28	39	0	18	0	NA	NA	663.214	NA	NA	0	0	10847687	0	0	NA mean under detection limit
663.214	C28 H39 O18	28	39	0	18	0	663.214	NA	NA	NA	NA	6022303	0	0	0	0	NA mean under detection limit
663.214	C28 H39 O18	28	39	0	18	0	NA	663.214	NA	NA	NA	0	5769758	0	0	0	NA mean under detection limit
665.121	C25 H29 O21	25	29	0	21	0	NA	NA	665.121	NA	NA	0	0	3017928	0	0	NA mean under detection limit
665.121	C25 H29 O21	25	29	0	21	0	665.121	NA	NA	NA	NA	5468012	0	0	0	0	NA mean under detection limit
665.121	C25 H29 O21	25	29	0	21	0	NA	665.121	NA	NA	NA	0	4112531	0	0	0	NA mean under detection limit
665.157	C26 H33 O20	26	33	0	20	0	NA	NA	665.157	NA	NA	0	0	4245718	0	0	NA mean under detection limit
665.157	C26 H33 O20	26	33	0	20	0	665.157	NA	NA	NA	NA	4046714	0	0	0	0	NA mean under detection limit
665.157	C26 H33 O20	26	33	0	20	0	NA	665.157	NA	NA	NA	0	5239967	0	0	0	NA mean under detection limit
666.207	C27 H40 N O16 S	27	40	1	16	1	NA	666.207	NA	NA	NA	0	4208122	0	0	0	NA mean under detection limit
667.676	C47 H87 O	47	87	0	1	0	NA	NA	NA	667.676	NA	0	0	0	4066161	0	NA mean under detection limit
668.15	C25 H34 N O18 S	25	34	1	18	1	668.15	NA	NA	NA	NA	2789361	0	0	0	0	NA mean under detection limit
668.187	C26 H38 N O17 S	26	38	1	17	1	668.186	NA	NA	NA	NA	3276799	0	0	0	0	NA mean under detection limit
668.187	C26 H38 N O17 S	26	38	1	17	1	NA	668.186	NA	NA	NA	0	3799178	0	0	0	NA mean under detection limit
668.223	C27 H42 N O16 S	27	42	1	16	1	NA	NA	668.223	NA	NA	0	0	2771366	0	0	NA mean under detection limit
668.223	C27 H42 N O16 S	27	42	1	16	1	NA	668.223	NA	NA	NA	0	4794519	0	0	0	NA mean under detection limit
669.134	C25 H33 O19 S	25	33	0	19	1	NA	NA	669.134	NA	NA	0	0	6227731	0	0	NA mean under detection limit
669.134	C25 H33 O19 S	25	33	0	19	1	669.134	NA	NA	NA	NA	13352302	0	0	0	0	NA mean under detection limit
669.134	C25 H33 O19 S	25	33	0	19	1	NA	669.134	NA	NA	NA	0	3592645	0	0	0	NA mean under detection limit
670.166	C25 H36 N O18 S	25	36	1	18	1	NA	NA	NA	670.166	NA	0	0	0	2612210	0	NA mean under detection limit
671.15	C25 H35 O19 S	25	35	0	19	1	NA	NA	671.15	NA	NA	0	0	45056564	0	0	NA mean under detection limit
671.15	C25 H35 O19 S	25	35	0	19	1	671.15	NA	NA	NA	NA	67264640	0	0	0	0	NA mean under detection limit
671.15	C25 H35 O19 S	25	35	0	19	1	NA	671.15	NA	NA	NA	0	17935462	0	0	0	NA mean under detection limit
671.15	C25 H35 O19 S	25	35	0	19	1	NA	NA	NA	671.15	NA	0	0	0	4938180	0	NA mean under detection limit
671.152	C21 H35 O24	21	35	0	24	0	671.153	NA	NA	NA	NA	10903684	0	0	0	0	NA mean under detection limit
671.219	C30 H39 O17	30	39	0	17	0	NA	671.219	NA	NA	NA	0	4453501	0	0	0	NA mean under detection limit
673.126	C27 H29 O20	27	29	0	20	0	673.126	NA	NA	NA	NA	2698132	0	0	0	0	NA mean under detection limit
673.126	C27 H29 O20	27	29	0	20	0	NA	673.126	NA	NA	NA	0	2585339	0	0	0	NA mean under detection limit
673.162	C28 H33 O19	28	33	0	19	0	NA	673.162	NA	NA	NA	0	3997447	0	0	0	NA mean under detection limit
673.199	C29 H37 O18	29	37	0	18	0	NA	NA	673.199	NA	NA	0	0	2795873	0	0	NA mean under detection limit
673.199	C29 H37 O18	29	37	0	18	0	NA	673.198	NA	NA	NA	0	3809043	0	0	0	NA mean under detection limit
673.235	C30 H41 O17	30	41	0	17	0	NA	673.235	NA	NA	NA	0	2757408	0	0	0	NA mean under detection limit
675.141	C27 H31 O20	27	31	0	20	0	NA	NA	675.142	NA	NA	0	0	4730974	0	0	NA mean under detection limit
675.141	C27 H31 O20	27	31	0	20	0	675.141	NA	NA	NA	NA	7104192	0	0	0	0	NA mean under detection limit
675.141	C27 H31 O20	27	31	0	20	0	NA	675.141	NA	NA	NA	0	9654689	0	0	0	NA mean under detection limit
675.141	C27 H31 O20	27	31	0	20	0	NA	NA	NA	675.141	NA	0	0	0	3797349	0	NA mean under detection limit
675.178	C28 H35 O19	28	35	0	19	0	NA	NA	675.178	NA	NA	0	0	3535980	0	0	NA mean under detection limit
675.178	C28 H35 O19	28	35	0	19	0	675.178	NA	NA	NA	NA	2753231	0	0	0	0	NA mean under detection limit
675.178	C28 H35 O19	28	35	0	19	0	NA	675.178	NA	NA	NA	0	5540270	0	0	0	NA mean under detection limit
675.214	C29 H39 O18	29	39	0	18	0	NA	NA	675.214	NA	NA	0	0	5509242	0	0	NA mean under detection limit
675.214	C29 H39 O18	29	39	0	18	0	675.214	NA	NA	NA	NA	2935518	0	0	0	0	NA mean under detection limit
675.214	C29 H39 O18	29	39	0	18	0	NA	675.214	NA	NA	NA	0	10654138	0	0	0	NA mean under detection limit
677.084	C25 H25 O22	25	25	0	22	0	NA	NA	677.084	NA	NA	0	0	2571091	0	0	NA mean under detection limit
677.084	C25 H25 O22	25	25	0	22	0	677.084	NA	NA	NA	NA	12192219	0	0	0	0	NA mean under detection limit
677.084	C25 H25 O22	25	25	0	22	0	NA	NA	NA	677.084	NA	0	0	0	9971012	0	NA mean under detection limit
677.121	C26 H29 O21	26	29	0	21	0	NA	NA	677.12	NA	NA	0	0	2944865	0	0	NA mean under detection limit
677.121	C26 H29 O21	26	29	0	21	0	677.121	NA	NA	NA	NA	6992363	0	0	0	0	NA mean under detection limit
677.121	C26 H29 O21	26	29	0	21	0	NA	677.121	NA	NA	NA	0	3250239	0	0	0	NA mean under detection limit
677.121	C26 H29 O21	26	29	0	21	0	NA	NA	NA	677.121	NA	0	0	0	4298071	0	NA mean under detection limit
677.157	C27 H33 O20	27	33	0	20	0	NA	NA	677.157	NA	NA	0	0	7019375	0	0	NA mean under detection limit
677.157	C27 H33 O20	27	33	0	20	0	677.157	NA	NA	NA	NA	8641017	0	0	0	0	NA mean under detection limit
677.157	C27 H33 O20	27	33	0	20	0	NA	677.157	NA	NA	NA	0	12051532	0	0	0	NA mean under detection limit
677.157	C27 H33 O20	27	33	0	20	0	NA	NA	NA	677.157	NA	0	0	0	3123561	0	NA mean under detection limit
677.193	C28 H37 O19	28	37	0	19	0	NA	NA	677.193	NA	NA	0	0	3252093	0	0	NA mean under detection limit
677.193	C28 H37 O19	28	37	0	19	0	677.193	NA	NA	NA	NA	6896137	0	0	0	0	NA mean under detection limit
677.193	C28 H37 O19	28	37	0	19	0	NA	677.193	NA	NA	NA	0	5682264	0	0	0	NA mean under detection limit
677.193	C28 H37 O19	28	37	0	19	0	NA	NA	NA	677.194	NA	0	0	0	4042108	0	NA mean under detection limit
677.23	C29 H41 O18	29	41	0	18	0	NA	NA	677.23	NA	NA	0	0	13065099	0	0	NA mean under detection limit
677.23	C29 H41 O18	29	41	0	18	0	NA	677.23	NA	NA	NA	0	21247076	0	0	0	NA mean under detection limit
679.1	C25 H27 O22	25	27	0	22	0	679.1	NA	NA	NA	NA	3192098	0	0	0	0	NA mean under detection limit
679.1	C25 H27 O22	25	27	0	22	0	NA	NA	NA	679.1	NA	0	0	0	4467045	0	NA mean under detection limit
679.136	C26 H31 O21	26	31	0	21	0	NA	NA	679.136	NA	NA	0	0	2780779	0	0	NA mean under detection limit
679.136	C26 H31 O21	26	31	0	21	0	679.136	NA	NA	NA	NA	6366513	0	0	0	0	NA mean under detection limit
679.136	C26 H31 O21	26	31	0	21	0	NA	679.136	NA	NA	NA	0	4474606	0	0	0	NA mean under detection limit
679.136	C26 H31 O21	26	31	0	21	0	NA	NA	NA	679.136	NA	0	0	0	3443064	0	NA mean under detection limit
679.173	C27 H35 O20	27	35	0	20	0	NA	NA	679.173	NA	NA	0	0	3765881	0	0	NA mean under detection limit
679.173	C27 H35 O20	27	35	0	20	0	679.173	NA	NA	NA	NA	4648257	0	0	0	0	NA mean under detection limit
679.173	C27 H35 O20	27	35	0	20	0	NA	679.173	NA	NA	NA	0	5979898	0	0	0	NA mean under detection limit
679.179	C20 H39 O25	20	39	0	25	0	679.179	NA	NA	NA	NA	2611523	0	0	0	0	NA mean under detection limit
679.209	C28 H39 O19	28	39	0	19	0	679.209	NA	NA	NA	NA	3896656	0	0	0	0	NA mean under detection limit
680.223	C28 H42 N O16 S	28	42	1	16	1	NA	680.223	NA	NA	NA	0	2911330	0	0	0	NA mean under detection limit
682.166	C26 H36 N O18 S	26	36	1	18	1	NA	682.166	NA	NA	NA	0	2771710	0	0	0	NA mean under detection limit
682.202	C27 H40 N O17 S	27	40	1	17	1	682.202	NA	NA	NA	NA	3192392	0	0	0	0	NA mean under detection limit
682.239	C28 H44 N O16 S	28	44	1	16	1	NA	682.238	NA	NA	NA	0	3267351	0	0	0	NA mean under detection limit
683.15	C26 H35 O19 S	26	35	0	19	1	NA	NA	683.15	NA	NA	0	0	8295517	0	0	NA mean under detection limit
683.15	C26 H35 O19 S	26	35	0	19	1	683.15	NA	NA	NA	NA	4338658	0	0	0	0	NA mean under detection limit
683.15	C26 H35 O19 S	26	35	0	19	1	NA	683.15	NA	NA	NA	0	6777939	0	0	0	NA mean under detection limit
684.182	C26 H38 N O18 S	26	38	1	18	1	684.181	NA	NA	NA	NA	4320676	0	0	0	0	NA mean under detection limit
685.166	C26 H37 O19 S	26	37	0	19	1	NA	NA	685.166	NA	NA	0	0	44832584	0	0	NA mean under detection limit
685.166	C26 H37 O19 S	26	37	0	19	1	685.166	NA	NA	NA	NA	8689493	0	0	0	0	NA mean under detection limit
685.166	C26 H37 O19 S	26	37	0	19	1	NA	685.165	NA	NA	NA	0	43605776	0	0	0	NA mean under detection limit
685.235	C31 H41 O17	31	41	0	17	0	NA	685.235	NA	NA	NA	0	2723624	0	0	0	NA mean under detection limit
687.141	C28 H31 O20	28	31	0	20	0	NA	687.141	NA	NA	NA	0	2799045	0	0	0	NA mean under detection limit
689.157	C28 H33 O20	28	33	0	20	0	NA	NA	689.157	NA	NA	0	0	3529966	0	0	NA mean under detection limit
689.157	C28 H33 O20	28	33	0	20	0	689.157	NA	NA	NA	NA	4531802	0	0	0	0	NA mean under detection limit
689.157	C28 H33 O20	28	33	0	20	0	NA	689.157	NA	NA	NA	0	5921933	0	0	0	NA mean under detection limit
689.193	C29 H37 O19	29	37	0	19	0	689.193	NA	NA	NA	NA	3214954	0	0	0	0	NA mean under detection limit
689.193	C29 H37 O19	29	37	0	19	0	NA	689.193	NA	NA	NA	0	3227802	0	0	0	NA mean under detection limit
689.23	C30 H41 O18	30	41	0	18	0	NA	NA	689.23	NA	NA	0	0	2692360	0	0	NA mean under detection limit
689.23	C30 H41 O18	30	41	0	18	0	NA	689.23	NA	NA	NA	0	5811367	0	0	0	NA mean under detection limit
691.1	C26 H27 O22	26	27	0	22	0	NA	NA	691.1	NA	NA	0	0	5414813	0	0	NA mean under detection limit
691.1	C26 H27 O22	26	27	0	22	0	691.1	NA	NA	NA	NA	8571355	0	0	0	0	NA mean under detection limit
691.1	C26 H27 O22	26	27	0	22	0	NA	691.1	NA	NA	NA	0	6747970	0	0	0	NA mean under detection limit
691.136	C27 H31 O21	27	31	0	21	0	NA	NA	691.137	NA	NA	0	0	3633065	0	0	NA mean under detection limit
691.136	C27 H31 O21	27	31	0	21	0	691.136	NA	NA	NA	NA	4530668	0	0	0	0	NA mean under detection limit
691.136	C27 H31 O21	27	31	0	21	0	NA	691.136	NA	NA	NA	0	3923791	0	0	0	NA mean under detection limit
691.173	C28 H35 O20	28	35	0	20	0	NA	NA	691.173	NA	NA	0	0	5359542	0	0	NA mean under detection limit
691.173	C28 H35 O20	28	35	0	20	0	691.173	NA	NA	NA	NA	4958717	0	0	0	0	NA mean under detection limit
691.173	C28 H35 O20	28	35	0	20	0	NA	691.173	NA	NA	NA	0	9164636	0	0	0	NA mean under detection limit
691.209	C29 H39 O19	29	39	0	19	0	NA	NA	691.209	NA	NA	0	0	3256259	0	0	NA mean under detection limit
691.209	C29 H39 O19	29	39	0	19	0	691.209	NA	NA	NA	NA	3017230	0	0	0	0	NA mean under detection limit
691.209	C29 H39 O19	29	39	0	19	0	NA	691.209	NA	NA	NA	0	3536745	0	0	0	NA mean under detection limit
691.245	C30 H43 O18	30	43	0	18	0	NA	NA	691.245	NA	NA	0	0	4102096	0	0	NA mean under detection limit
691.245	C30 H43 O18	30	43	0	18	0	NA	691.245	NA	NA	NA	0	9574262	0	0	0	NA mean under detection limit
691.427	C35 H63 O13	35	63	0	13	0	NA	NA	NA	691.428	NA	0	0	0	2797963	0	NA mean under detection limit
693.116	C26 H29 O22	26	29	0	22	0	NA	NA	693.115	NA	NA	0	0	2900571	0	0	NA mean under detection limit
693.116	C26 H29 O22	26	29	0	22	0	693.115	NA	NA	NA	NA	12563854	0	0	0	0	NA mean under detection limit
693.116	C26 H29 O22	26	29	0	22	0	NA	NA	NA	693.116	NA	0	0	0	8903117	0	NA mean under detection limit
693.152	C27 H33 O21	27	33	0	21	0	NA	NA	693.152	NA	NA	0	0	5102183	0	0	NA mean under detection limit
693.152	C27 H33 O21	27	33	0	21	0	693.152	NA	NA	NA	NA	6987167	0	0	0	0	NA mean under detection limit
693.152	C27 H33 O21	27	33	0	21	0	NA	693.152	NA	NA	NA	0	6212133	0	0	0	NA mean under detection limit
693.188	C28 H37 O20	28	37	0	20	0	NA	NA	693.188	NA	NA	0	0	2664564	0	0	NA mean under detection limit
693.188	C28 H37 O20	28	37	0	20	0	NA	693.188	NA	NA	NA	0	4057650	0	0	0	NA mean under detection limit
693.225	C29 H41 O19	29	41	0	19	0	NA	NA	693.225	NA	NA	0	0	3493504	0	0	NA mean under detection limit
693.225	C29 H41 O19	29	41	0	19	0	NA	693.225	NA	NA	NA	0	2845247	0	0	0	NA mean under detection limit
695.095	C25 H27 O23	25	27	0	23	0	NA	NA	NA	695.095	NA	0	0	0	3430120	0	NA mean under detection limit
695.131	C26 H31 O22	26	31	0	22	0	695.131	NA	NA	NA	NA	4794703	0	0	0	0	NA mean under detection limit
695.131	C26 H31 O22	26	31	0	22	0	NA	NA	NA	695.131	NA	0	0	0	3773184	0	NA mean under detection limit
696.182	C27 H38 N O18 S	27	38	1	18	1	NA	696.181	NA	NA	NA	0	2620019	0	0	0	NA mean under detection limit
696.218	C28 H42 N O17 S	28	42	1	17	1	NA	696.218	NA	NA	NA	0	3673728	0	0	0	NA mean under detection limit
697.166	C27 H37 O19 S	27	37	0	19	1	NA	NA	697.166	NA	NA	0	0	4542405	0	0	NA mean under detection limit
697.166	C27 H37 O19 S	27	37	0	19	1	NA	697.165	NA	NA	NA	0	10219484	0	0	0	NA mean under detection limit
698.197	C27 H40 N O18 S	27	40	1	18	1	NA	NA	698.197	NA	NA	0	0	2819362	0	0	NA mean under detection limit
698.197	C27 H40 N O18 S	27	40	1	18	1	NA	698.197	NA	NA	NA	0	3488089	0	0	0	NA mean under detection limit
699.145	C26 H35 O20 S	26	35	0	20	1	699.145	NA	NA	NA	NA	4116722	0	0	0	0	NA mean under detection limit
699.16	C30 H35 O17 S	30	35	0	17	1	NA	NA	NA	699.16	NA	0	0	0	3339706	0	NA mean under detection limit
699.181	C27 H39 O19 S	27	39	0	19	1	NA	NA	699.181	NA	NA	0	0	18049646	0	0	NA mean under detection limit
699.181	C27 H39 O19 S	27	39	0	19	1	NA	699.181	NA	NA	NA	0	62747336	0	0	0	NA mean under detection limit
699.184	C23 H39 O24	23	39	0	24	0	NA	NA	NA	699.183	NA	0	0	0	5480906	0	NA mean under detection limit
701.157	C29 H33 O20	29	33	0	20	0	NA	701.157	NA	NA	NA	0	2965928	0	0	0	NA mean under detection limit
701.193	C30 H37 O19	30	37	0	19	0	701.193	NA	NA	NA	NA	4414700	0	0	0	0	NA mean under detection limit
701.193	C30 H37 O19	30	37	0	19	0	NA	NA	NA	701.194	NA	0	0	0	6952779	0	NA mean under detection limit
701.23	C31 H41 O18	31	41	0	18	0	NA	701.23	NA	NA	NA	0	3221955	0	0	0	NA mean under detection limit
703.136	C28 H31 O21	28	31	0	21	0	703.136	NA	NA	NA	NA	3437756	0	0	0	0	NA mean under detection limit
703.136	C28 H31 O21	28	31	0	21	0	NA	703.136	NA	NA	NA	0	3415187	0	0	0	NA mean under detection limit
703.136	C28 H31 O21	28	31	0	21	0	NA	NA	NA	703.136	NA	0	0	0	2843826	0	NA mean under detection limit
703.173	C29 H35 O20	29	35	0	20	0	NA	NA	703.173	NA	NA	0	0	3001256	0	0	NA mean under detection limit
703.173	C29 H35 O20	29	35	0	20	0	703.173	NA	NA	NA	NA	2715854	0	0	0	0	NA mean under detection limit
703.173	C29 H35 O20	29	35	0	20	0	NA	703.173	NA	NA	NA	0	5306528	0	0	0	NA mean under detection limit
703.209	C30 H39 O19	30	39	0	19	0	703.209	NA	NA	NA	NA	2785505	0	0	0	0	NA mean under detection limit
703.209	C30 H39 O19	30	39	0	19	0	NA	703.209	NA	NA	NA	0	3793070	0	0	0	NA mean under detection limit
703.245	C31 H43 O18	31	43	0	18	0	NA	703.245	NA	NA	NA	0	4137148	0	0	0	NA mean under detection limit
705.116	C27 H29 O22	27	29	0	22	0	NA	NA	705.116	NA	NA	0	0	7166514	0	0	NA mean under detection limit
705.116	C27 H29 O22	27	29	0	22	0	705.116	NA	NA	NA	NA	16121001	0	0	0	0	NA mean under detection limit
705.116	C27 H29 O22	27	29	0	22	0	NA	705.116	NA	NA	NA	0	11979652	0	0	0	NA mean under detection limit
705.116	C27 H29 O22	27	29	0	22	0	NA	NA	NA	705.116	NA	0	0	0	11909702	0	NA mean under detection limit
705.152	C28 H33 O21	28	33	0	21	0	NA	NA	705.152	NA	NA	0	0	4772414	0	0	NA mean under detection limit
705.152	C28 H33 O21	28	33	0	21	0	705.152	NA	NA	NA	NA	5586108	0	0	0	0	NA mean under detection limit
705.152	C28 H33 O21	28	33	0	21	0	NA	705.152	NA	NA	NA	0	7840658	0	0	0	NA mean under detection limit
705.152	C28 H33 O21	28	33	0	21	0	NA	NA	NA	705.152	NA	0	0	0	4573793	0	NA mean under detection limit
705.188	C29 H37 O20	29	37	0	20	0	NA	NA	705.189	NA	NA	0	0	4993610	0	0	NA mean under detection limit
705.188	C29 H37 O20	29	37	0	20	0	705.188	NA	NA	NA	NA	8096975	0	0	0	0	NA mean under detection limit
705.188	C29 H37 O20	29	37	0	20	0	NA	705.188	NA	NA	NA	0	7664544	0	0	0	NA mean under detection limit
705.188	C29 H37 O20	29	37	0	20	0	NA	NA	NA	705.188	NA	0	0	0	4899451	0	NA mean under detection limit
705.225	C30 H41 O19	30	41	0	19	0	NA	NA	705.225	NA	NA	0	0	5454422	0	0	NA mean under detection limit
705.225	C30 H41 O19	30	41	0	19	0	NA	705.225	NA	NA	NA	0	6689710	0	0	0	NA mean under detection limit
707.131	C27 H31 O22	27	31	0	22	0	NA	NA	707.131	NA	NA	0	0	6696148	0	0	NA mean under detection limit
707.131	C27 H31 O22	27	31	0	22	0	707.131	NA	NA	NA	NA	11329715	0	0	0	0	NA mean under detection limit
[truncated: 570 more rows]
